# Supplementary material for: Extreme environmental adaptation mechanisms of Antarctic bryophytes are mainly the activation of antioxidants, secondary metabolites and photosynthetic pathways
Source: BMC Plant Biol. 2023 Aug 22;23:399. doi: 10.1186/s12870-023-04366-w (PMC10464054; doi:10.1186/s12870-023-04366-w)
Supplement: Supplementary file 1 — Additional file 1. [file 12870_2023_4366_MOESM1_ESM.xls]

## Sheet: file1
gene_id	Length	NR Identity	NR Evalue	NR ID	NR Description	NT Identity	NT Evalue	NT ID	NT Description	KO ID	KO Name	KO Description	KO Ec	KO Pathway	Swissprot Identity	Swissprot Evalue	Swissprot ID	Swissprot Description	PFAM ID:PFAM Description	Gene Ontology Biological Pathway	BP Description	Gene Ontology Cellular Component	CC Description	Gene Ontology Molecular Function	MF Description	KOG ID	KOG Description
transcript_HQ_TX_pn_transcript25606/f2p0/2509	2509	92.9	5.7e-242	XP_001784242.1	predicted protein [Physcomitrella patens]	77.769	0	XM_001759144.1	Physcomitrella patens subsp. patens predicted protein (PHYPADRAFT_179535) mRNA, complete cds	K00975	glgC	glucose-1-phosphate adenylyltransferase	2.7.7.27	ko00500; Metabolism; Carbohydrate metabolism; Starch and sucrose metabolism | ko00520; Metabolism; Carbohydrate metabolism; Amino sugar and nucleotide sugar metabolism | ko02026; Cellular Processes; Cellular community - prokaryotes; Biofilm formation - Escherichia coli	71.5	7.3e-187	sp|P55230|GLGL2_ARATH	Glucose-1-phosphate adenylyltransferase large subunit 2, chloroplastic OS=Arabidopsis thaliana GN=APL2 PE=1 SV=2	PF07959:L-fucokinase;PF00483:Nucleotidyl transferase	GO:0009058	biosynthetic process	--	--	GO:0016779//GO:0016772	nucleotidyltransferase activity//transferase activity, transferring phosphorus-containing groups	At1g27680	GDP-mannose pyrophosphorylase/mannose-1-phosphate guanylyltransferase
transcript_HQ_TX_pn_transcript38071/f4p0/2157	2157	46.6	6e-75	XP_001767938.1	predicted protein [Physcomitrella patens]	79.245	2.51e-20	XM_010560275.1	PREDICTED: Tarenaya hassleriana transcription factor HEC1 (LOC104827166), mRNA	-	-	-	-	-	84.6	2.6e-23	sp|Q9FHA7|HEC1_ARATH	Transcription factor HEC1 OS=Arabidopsis thaliana GN=HEC1 PE=1 SV=1	PF00010:Helix-loop-helix DNA-binding domain	--	--	--	--	GO:0046983	protein dimerization activity	--	--
transcript_HQ_TX_pn_transcript39449/f3p0/2125	2125	--	--	--	--	--	--	--	--	--	--	--	--	--	--	--	--	--	--	--	--	--	--	--	--	--	--
transcript_HQ_TX_pn_transcript52421/f2p0/1816	1816	70.4	9.8e-111	XP_001764830.1	predicted protein [Physcomitrella patens]	--	--	--	--	--	--	--	--	--	33.3	1.1e-38	sp|O74745|ANP1_SCHPO	Mannan polymerase II complex anp1 subunit OS=Schizosaccharomyces pombe (strain 972 / ATCC 24843) GN=anp1 PE=3 SV=1	--	--	--	--	--	--	--	--	--
transcript_HQ_TX_pn_transcript16070/f2p0/2866	2866	--	--	--	--	--	--	--	--	--	--	--	--	--	--	--	--	--	--	--	--	--	--	--	--	--	--
transcript_HQ_TX_pn_transcript49089/f6p0/1903	1903	77.1	1.2e-207	XP_001784456.1	predicted protein [Physcomitrella patens]	--	--	--	--	K01369	LGMN	legumain	3.4.22.34	ko04142; Cellular Processes; Transport and catabolism; Lysosome | ko04612; Organismal Systems; Immune system; Antigen processing and presentation	59.5	9.9e-160	sp|Q39119|VPEG_ARATH	Vacuolar-processing enzyme gamma-isozyme OS=Arabidopsis thaliana GN=At4g32940 PE=2 SV=2	PF01650:Peptidase C13 family;PF05985:Ethanolamine ammonia-lyase light chain (EutC)	GO:0006508//GO:0006520	proteolysis//cellular amino acid metabolic process	--	--	GO:0008233//GO:0008851	peptidase activity//ethanolamine ammonia-lyase activity	At4g32940	Asparaginyl peptidases
transcript_HQ_TX_pn_transcript75844/f2p0/720	720	--	--	--	--	--	--	--	--	--	--	--	--	--	--	--	--	--	PF02496:ABA/WDS induced protein	GO:0006950	response to stress	--	--	--	--	--	--
transcript_HQ_TX_pn_transcript24021/f2p0/2564	2564	81.4	1.4e-65	XP_001759014.1	predicted protein [Physcomitrella patens]	81.829	0	XM_001758962.1	Physcomitrella patens subsp. patens predicted protein (PHYPADRAFT_206822) mRNA, complete cds	K17263	CAND1	cullin-associated NEDD8-dissociated protein 1	-	-	62.5	2.3e-50	sp|Q8L5Y6|CAND1_ARATH	Cullin-associated NEDD8-dissociated protein 1 OS=Arabidopsis thaliana GN=CAND1 PE=1 SV=1	PF07722:Peptidase C26	GO:0006541	glutamine metabolic process	--	--	GO:0016787	hydrolase activity	At2g02560	TATA-binding protein-interacting protein
transcript_HQ_TX_pn_transcript19404/f23p0/2667	2667	79.2	4.4e-184	XP_001770840.1	predicted protein [Physcomitrella patens]	--	--	--	--	-	-	-	-	-	39.8	2.9e-72	sp|Q8S4W7|GAI1_VITVI	DELLA protein GAI1 OS=Vitis vinifera GN=GAI1 PE=2 SV=1	PF02272:DHHA1 domain	--	--	--	--	GO:0003676	nucleic acid binding	--	--
transcript_HQ_TX_pn_transcript56126/f6p0/1716	1716	86.6	1.1e-188	XP_001754012.1	predicted protein [Physcomitrella patens]	--	--	--	--	-	-	-	-	-	64.2	6.9e-136	sp|O80632|MTP11_ARATH	Metal tolerance protein 11 OS=Arabidopsis thaliana GN=MTP11 PE=2 SV=1	PF01545:Cation efflux family	GO:0055085//GO:0006812	transmembrane transport//cation transport	GO:0016021	integral component of membrane	GO:0008324	cation transmembrane transporter activity	At2g39450	Mitochondrial Fe2+ transporter MMT1 and related transporters (cation diffusion facilitator superfamily)
transcript_HQ_TX_pn_transcript42097/f5p0/2097	2097	97	2.4e-302	AHI15954.1	flavonoid 3'-hydroxylase [Pohlia nutans]	99.731	0	KF835379.1	Pohlia nutans isolate MFC85494 flavonoid 3'-hydroxylase mRNA, complete cds	K05280	E1.14.13.21	flavonoid 3'-monooxygenase	1.14.13.21	ko00941; Metabolism; Biosynthesis of other secondary metabolites; Flavonoid biosynthesis | ko00944; Metabolism; Biosynthesis of other secondary metabolites; Flavone and flavonol biosynthesis	34.3	1.8e-74	sp|Q9SD85|F3PH_ARATH	Flavonoid 3'-monooxygenase OS=Arabidopsis thaliana GN=CYP75B1 PE=1 SV=1	PF00067:Cytochrome P450	GO:0055114	oxidation-reduction process	--	--	GO:0020037//GO:0016705//GO:0005506	heme binding//oxidoreductase activity, acting on paired donors, with incorporation or reduction of molecular oxygen//iron ion binding	At5g07990	Cytochrome P450 CYP2 subfamily
transcript_HQ_TX_pn_transcript47834/f17p0/1873	1873	52.3	1.6e-95	XP_001772959.1	predicted protein [Physcomitrella patens]	--	--	--	--	-	-	-	-	-	37.7	3.8e-71	sp|Q766C3|NEP1_NEPGR	Aspartic proteinase nepenthesin-1 OS=Nepenthes gracilis GN=nep1 PE=1 SV=1	--	--	--	--	--	--	--	At1g25510	Aspartyl protease
transcript_HQ_TX_pn_transcript69755/f2p0/1220	1220	--	--	--	--	--	--	--	--	--	--	--	--	--	--	--	--	--	--	--	--	--	--	--	--	--	--
transcript_HQ_TX_pn_transcript19742/f7p0/2608	2608	68.2	2.2e-241	XP_001775500.1	PLC2 phosphlipase C protein [Physcomitrella patens]	77.696	7.49e-106	XM_001775448.1	Physcomitrella patens subsp. patens PLC2 phosphlipase C protein (PLC2) mRNA, complete cds	K05857	PLCD	phosphatidylinositol phospholipase C, delta	3.1.4.11	ko00562; Metabolism; Carbohydrate metabolism; Inositol phosphate metabolism | ko04020; Environmental Information Processing; Signal transduction; Calcium signaling pathway | ko04070; Environmental Information Processing; Signal transduction; Phosphatidylinositol signaling system | ko04919; Organismal Systems; Endocrine system; Thyroid hormone signaling pathway | ko04933; Human Diseases; Endocrine…	48.1	1.8e-143	sp|Q8GV43|PLCD6_ARATH	Phosphoinositide phospholipase C 6 OS=Arabidopsis thaliana GN=PLC6 PE=2 SV=2	PF00168:C2 domain;PF00387:Phosphatidylinositol-specific phospholipase C, Y domain	GO:0007165//GO:0035556//GO:0006629	signal transduction//intracellular signal transduction//lipid metabolic process	--	--	GO:0005515//GO:0004435	protein binding//phosphatidylinositol phospholipase C activity	At5g58700	Phosphoinositide-specific phospholipase C
transcript_HQ_TX_pn_transcript30353/f2p0/2365	2365	37.1	2.2e-41	XP_001765732.1	predicted protein [Physcomitrella patens]	--	--	--	--	-	-	-	-	-	33.5	2.3e-25	sp|P25848|PHY1_CERPU	Light-sensor Protein kinase OS=Ceratodon purpureus GN=PHY1 PE=3 SV=3	PF07714:Protein tyrosine kinase;PF00069:Protein kinase domain	GO:0006468	protein phosphorylation	--	--	GO:0004672//GO:0005524	protein kinase activity//ATP binding	At1g62400	Tyrosine kinase specific for activated (GTP-bound) p21cdc42Hs
transcript_HQ_TX_pn_transcript4437/f6p0/3726	3726	82.9	1.6e-288	XP_001763082.1	predicted protein [Physcomitrella patens]	86.295	0	XM_001763030.1	Physcomitrella patens subsp. patens predicted protein (PHYPADRAFT_126406) mRNA, partial cds	-	-	-	-	-	48.9	5.3e-157	sp|Q9LJR3|SPA3_ARATH	Protein SPA1-RELATED 3 OS=Arabidopsis thaliana GN=SPA3 PE=1 SV=1	PF00400:WD domain, G-beta repeat	--	--	--	--	GO:0005515	protein binding	--	--
transcript_HQ_TX_pn_transcript61638/f3p0/1557	1558	69.9	3.2e-110	XP_001766342.1	predicted protein [Physcomitrella patens]	--	--	--	--	-	-	-	-	-	--	--	--	--	--	--	--	--	--	--	--	--	--
transcript_HQ_TX_pn_transcript18690/f4p0/2656	2656	62.7	1.3e-220	XP_001776621.1	predicted protein [Physcomitrella patens]	76.462	0	AB979874.1	Physcomitrella patens PpPPR_45 mRNA for pentatricopeptide repeat protein, complete cds	-	-	-	-	-	43.1	2.8e-152	sp|Q7Y211|PP285_ARATH	Pentatricopeptide repeat-containing protein At3g57430, chloroplastic OS=Arabidopsis thaliana GN=PCMP-H81 PE=2 SV=2	PF14432:DYW family of nucleic acid deaminases	--	--	--	--	GO:0008270	zinc ion binding	At3g57430	FOG: PPR repeat
transcript_HQ_TX_pn_transcript68690/f4p0/1271	1271	72.3	1.2e-46	XP_001753258.1	predicted protein [Physcomitrella patens]	--	--	--	--	-	-	-	-	-	--	--	--	--	--	--	--	--	--	--	--	--	--
transcript_HQ_TX_pn_transcript4561/f2p0/3781	3777	82.8	0	XP_001753833.1	predicted protein [Physcomitrella patens]	82.834	0	XM_001753781.1	Physcomitrella patens subsp. patens predicted protein (PHYPADRAFT_175123) mRNA, complete cds	-	-	-	-	-	47.1	3.3e-215	sp|Q9S7Q2|PP124_ARATH	Pentatricopeptide repeat-containing protein At1g74850, chloroplastic OS=Arabidopsis thaliana GN=PTAC2 PE=2 SV=1	PF13176:Tetratricopeptide repeat;PF13762:Mitochondrial splicing apparatus component	GO:0000372	Group I intron splicing	GO:0030529	intracellular ribonucleoprotein complex	GO:0005515	protein binding	At1g74850	FOG: PPR repeat
transcript_HQ_TX_pn_transcript72473/f2p0/1051	1051	47.5	1.6e-36	EYU46631.1	hypothetical protein MIMGU_mgv1a014352mg [Erythranthe guttata]	--	--	--	--	-	-	-	-	-	43.4	9.3e-35	sp|P33490|ABP1_TOBAC	Auxin-binding protein T85 OS=Nicotiana tabacum GN=T85 PE=3 SV=1	PF06560:Glucose-6-phosphate isomerase (GPI);PF02041:Auxin binding protein;PF00190:Cupin	GO:0006094//GO:0006096	gluconeogenesis//glycolytic process	GO:0005737	cytoplasm	GO:0004347//GO:0045735//GO:0004872	glucose-6-phosphate isomerase activity//nutrient reservoir activity//receptor activity	--	--
transcript_HQ_TX_pn_transcript66667/f2p0/1385	1385	--	--	--	--	--	--	--	--	--	--	--	--	--	--	--	--	--	--	--	--	--	--	--	--	--	--
transcript_HQ_TX_pn_transcript63224/f3p0/1490	1490	49.4	4.4e-85	XP_001762511.1	predicted protein [Physcomitrella patens]	--	--	--	--	K09580	PDIA1, P4HB	protein disulfide-isomerase A1	5.3.4.1	ko04141; Genetic Information Processing; Folding, sorting and degradation; Protein processing in endoplasmic reticulum	42.6	2.8e-77	sp|Q0JD42|PDI52_ORYSJ	Protein disulfide isomerase-like 5-2 OS=Oryza sativa subsp. japonica GN=PDIL5-2 PE=2 SV=2	PF00578:AhpC/TSA family;PF01216:Calsequestrin;PF00085:Thioredoxin	GO:0055114//GO:0045454	oxidation-reduction process//cell redox homeostasis	--	--	GO:0016491//GO:0005509//GO:0016209	oxidoreductase activity//calcium ion binding//antioxidant activity	At1g35620	Protein disulfide isomerase (prolyl 4-hydroxylase beta subunit)
transcript_HQ_TX_pn_transcript20168/f7p0/2670	2670	84.5	0	XP_001785411.1	SM/Sec1-family protein [Physcomitrella patens]	84.437	0	XM_001785359.1	Physcomitrella patens subsp. patens SM/Sec1-family protein (SEC1A) mRNA, complete cds	K15292	STXBP1, MUNC18-1	syntaxin-binding protein 1	-	ko04721; Organismal Systems; Nervous system; Synaptic vesicle cycle	55.4	8.9e-199	sp|Q9C5X3|KEULE_ARATH	SNARE-interacting protein KEULE OS=Arabidopsis thaliana GN=KEU PE=1 SV=2	PF00995:Sec1 family	GO:0006904//GO:0016192	vesicle docking involved in exocytosis//vesicle-mediated transport	--	--	--	--	At1g12360	Vesicle trafficking protein Sec1
transcript_HQ_TX_pn_transcript45132/f2p0/1943	1943	81.3	2.6e-29	XP_001771508.1	predicted protein [Physcomitrella patens]	78.319	7.99e-30	XM_001771456.1	Physcomitrella patens subsp. patens predicted protein (PHYPADRAFT_19743) mRNA, partial cds	-	-	-	-	-	37.4	1.2e-11	sp|Q852U6|RHY1A_ARATH	Probable E3 ubiquitin-protein ligase RHY1A OS=Arabidopsis thaliana GN=RHY1A PE=2 SV=1	PF17123:RING-like zinc finger;PF00097:Zinc finger, C3HC4 type (RING finger);PF00628:PHD-finger;PF14634:zinc-RING finger domain;PF17122:Zinc-finger;PF12861:Anaphase-promoting complex subunit 11 RING-H2 finger;PF13639:Ring finger domain;PF12678:RING-H2 zinc finger domain	--	--	GO:0005680	anaphase-promoting complex	GO:0008270//GO:0046872//GO:0005515//GO:0004842	zinc ion binding//metal ion binding//protein binding//ubiquitin-protein transferase activity	At2g15580	FOG: Predicted E3 ubiquitin ligase
transcript_HQ_TX_pn_transcript64064/f2p0/1473	1473	63.1	3.5e-82	XP_001767608.1	predicted protein [Physcomitrella patens]	--	--	--	--	-	-	-	-	-	31.5	1.5e-46	sp|Q9M1Y1|SKI20_ARATH	F-box/kelch-repeat protein SKIP20 OS=Arabidopsis thaliana GN=SKIP20 PE=1 SV=1	PF01344:Kelch motif;PF12937:F-box-like;PF00646:F-box domain;PF07646:Kelch motif	--	--	--	--	GO:0005515	protein binding	At3g59940	FOG: Kelch repeat
transcript_HQ_TX_pn_transcript52118/f4p0/1824	1824	89.5	5.9e-164	XP_001782018.1	predicted protein [Physcomitrella patens]	84.746	0	XM_001781966.1	Physcomitrella patens subsp. patens predicted protein (PHYPADRAFT_110541) mRNA, complete cds	K01792	E5.1.3.15	glucose-6-phosphate 1-epimerase	5.1.3.15	ko00010; Metabolism; Carbohydrate metabolism; Glycolysis / Gluconeogenesis	68.6	2.6e-117	sp|Q40784|AAPC_CENCI	Putative glucose-6-phosphate 1-epimerase OS=Cenchrus ciliaris PE=2 SV=1	PF01263:Aldose 1-epimerase	GO:0005975	carbohydrate metabolic process	--	--	GO:0016853	isomerase activity	At5g57330	Uncharacterized enzymes related to aldose 1-epimerase
transcript_HQ_TX_pn_transcript11096/f12p0/3123	3123	93.6	1.1e-141	XP_001769312.1	predicted protein [Physcomitrella patens]	85.624	0	XM_001769260.1	Physcomitrella patens subsp. patens predicted protein (PHYPADRAFT_134606) mRNA, complete cds	-	-	-	-	-	31.1	4.4e-32	sp|O07427|MGLL_MYCTU	Monoacylglycerol lipase OS=Mycobacterium tuberculosis (strain ATCC 25618 / H37Rv) GN=Rv0183 PE=1 SV=2	PF02129:X-Pro dipeptidyl-peptidase (S15 family);PF00975:Thioesterase domain;PF02230:Phospholipase/Carboxylesterase;PF07819:PGAP1-like protein;PF01764:Lipase (class 3);PF00326:Prolyl oligopeptidase family	GO:0006629//GO:0006508//GO:0009058	lipid metabolic process//proteolysis//biosynthetic process	--	--	GO:0008236//GO:0016788//GO:0016787	serine-type peptidase activity//hydrolase activity, acting on ester bonds//hydrolase activity	At5g11650	Lysophospholipase
transcript_HQ_TX_pn_transcript57171/f2p0/1657	1657	74.2	4.8e-181	XP_001783649.1	predicted protein [Physcomitrella patens]	72.461	1.13e-32	AK366222.1	Hordeum vulgare subsp. vulgare mRNA for predicted protein, partial cds, clone: NIASHv2041D18	K00736	MGAT2	alpha-1,6-mannosyl-glycoprotein beta-1,2-N-acetylglucosaminyltransferase	2.4.1.143	ko00510; Metabolism; Glycan biosynthesis and metabolism; N-Glycan biosynthesis | ko00513; Metabolism; Glycan biosynthesis and metabolism; Various types of N-glycan biosynthesis	32.9	3.3e-50	sp|Q09326|MGAT2_RAT	Alpha-1,6-mannosyl-glycoprotein 2-beta-N-acetylglucosaminyltransferase OS=Rattus norvegicus GN=Mgat2 PE=1 SV=1	PF05060:N-acetylglucosaminyltransferase II (MGAT2)	GO:0009312	oligosaccharide biosynthetic process	GO:0016021//GO:0005795	integral component of membrane//Golgi stack	GO:0008455	alpha-1,6-mannosylglycoprotein 2-beta-N-acetylglucosaminyltransferase activity	At2g05320	N-acetylglucosaminyltransferase
transcript_HQ_TX_pn_transcript37817/f4p0/1988	1987	70.9	4e-142	XP_001768694.1	predicted protein [Physcomitrella patens]	74.138	2.82e-59	EF087382.1	Picea sitchensis clone WS02750_F21 unknown mRNA	-	-	-	-	-	30.8	4.2e-12	sp|Q8U4K7|PGK2_PYRFU	2-phosphoglycerate kinase OS=Pyrococcus furiosus (strain ATCC 43587 / DSM 3638 / JCM 8422 / Vc1) GN=pgk2 PE=3 SV=1	PF06414:Zeta toxin;PF00485:Phosphoribulokinase / Uridine kinase family;PF02224:Cytidylate kinase	GO:0006139//GO:0008152	nucleobase-containing compound metabolic process//metabolic process	--	--	GO:0016301//GO:0004127//GO:0005524	kinase activity//cytidylate kinase activity//ATP binding	--	--
transcript_HQ_TX_pn_transcript50828/f12p0/1803	1803	76.2	3.8e-91	XP_001773379.1	predicted protein [Physcomitrella patens]	--	--	--	--	-	-	-	-	-	--	--	--	--	PF01080:Presenilin	GO:0016485	protein processing	GO:0016021	integral component of membrane	GO:0004190	aspartic-type endopeptidase activity	--	--
transcript_HQ_TX_pn_transcript24500/f2p0/2548	2548	51.1	4.6e-114	BAL46028.1	Dof transcription factor [Physcomitrella patens]	80.978	8.14e-31	XM_016107267.1	PREDICTED: Arachis duranensis cyclic dof factor 2 (LOC107486705), mRNA	-	-	-	-	-	82	8.6e-26	sp|Q8LFV3|CDF3_ARATH	Cyclic dof factor 3 OS=Arabidopsis thaliana GN=CDF3 PE=1 SV=2	PF02701:Dof domain, zinc finger	GO:0006355	regulation of transcription, DNA-templated	--	--	GO:0003677	DNA binding	--	--
transcript_HQ_TX_pn_transcript20973/f5p0/2564	2564	--	--	--	--	--	--	--	--	--	--	--	--	--	--	--	--	--	--	--	--	--	--	--	--	--	--
transcript_HQ_TX_pn_transcript76578/f2p0/601	601	48	2.2e-27	XP_001754974.1	predicted protein [Physcomitrella patens]	--	--	--	--	K03541	psbR	photosystem II 10kDa protein	-	ko00195; Metabolism; Energy metabolism; Photosynthesis	46.9	3.1e-27	sp|Q40070|PSBR_HORVU	Photosystem II 10 kDa polypeptide, chloroplastic OS=Hordeum vulgare GN=PSBR PE=3 SV=1	PF04725:Photosystem II 10 kDa polypeptide PsbR	GO:0015979	photosynthesis	GO:0009523//GO:0042651//GO:0009654	photosystem II//thylakoid membrane//photosystem II oxygen evolving complex	--	--	--	--
transcript_HQ_TX_pn_transcript65768/f6p0/1364	1364	70.4	2.7e-161	XP_001765832.1	predicted protein [Physcomitrella patens]	--	--	--	--	K20884	FHY	riboflavin kinase / FMN hydrolase [EC:2.7.1.26 3.1.3.102]	2.7.1.26,3.1.3.102	ko00740; Metabolism; Metabolism of cofactors and vitamins; Riboflavin metabolism	50.3	1.8e-110	sp|Q84MD8|FHYRK_ARATH	Bifunctional riboflavin kinase/FMN phosphatase OS=Arabidopsis thaliana GN=FHY PE=1 SV=1	PF01687:Riboflavin kinase	GO:0009231	riboflavin biosynthetic process	--	--	GO:0008531	riboflavin kinase activity	At4g21470_2	Riboflavin kinase
transcript_HQ_TX_pn_transcript10315/f6p0/3154	3154	90.2	1.9e-149	XP_001774529.1	predicted protein [Physcomitrella patens]	84.284	0	XM_001774477.1	Physcomitrella patens subsp. patens predicted protein (PHYPADRAFT_141468) mRNA, complete cds	K00276	AOC3, AOC2, tynA	primary-amine oxidase	1.4.3.21	ko00260; Metabolism; Amino acid metabolism; Glycine, serine and threonine metabolism | ko00350; Metabolism; Amino acid metabolism; Tyrosine metabolism | ko00360; Metabolism; Amino acid metabolism; Phenylalanine metabolism | ko00410; Metabolism; Metabolism of other amino acids; beta-Alanine metabolism | ko00950; Metabolism; Biosynthesis of other secondary metabolites; Isoquinoline alkaloid biosynt…	50.6	9.9e-40	sp|Q07123|AMO2_ARTS1	Copper methylamine oxidase OS=Arthrobacter sp. (strain P1) GN=maoII PE=1 SV=1	PF01179:Copper amine oxidase, enzyme domain;PF02727:Copper amine oxidase, N2 domain;PF02728:Copper amine oxidase, N3 domain	GO:0055114//GO:0009308	oxidation-reduction process//amine metabolic process	--	--	GO:0008131//GO:0048038//GO:0005507	primary amine oxidase activity//quinone binding//copper ion binding	At2g42490	Copper amine oxidase
transcript_HQ_TX_pn_transcript31720/f2p0/2325	2325	67.4	2.8e-118	XP_001755384.1	predicted protein [Physcomitrella patens]	--	--	--	--	-	-	-	-	-	41.8	8.9e-54	sp|Q4V3C1|MED8_ARATH	Mediator of RNA polymerase II transcription subunit 8 OS=Arabidopsis thaliana GN=MED8 PE=1 SV=1	PF02862:DDHD domain	--	--	--	--	GO:0046872	metal ion binding	--	--
transcript_HQ_TX_pn_transcript37768/f4p0/2170	2170	32.7	1.1e-28	XP_001761650.1	predicted protein [Physcomitrella patens]	--	--	--	--	-	-	-	-	-	--	--	--	--	PF00646:F-box domain;PF12937:F-box-like	--	--	--	--	GO:0005515	protein binding	--	--
transcript_HQ_TX_pn_transcript43267/f5p0/2009	2009	46.8	3.7e-95	XP_002989549.1	hypothetical protein SELMODRAFT_428089 [Selaginella moellendorffii]	--	--	--	--	-	-	-	-	-	--	--	--	--	--	--	--	--	--	--	--	--	--
transcript_HQ_TX_pn_transcript69783/f7p0/1205	1205	86.6	1e-140	XP_001783747.1	predicted protein [Physcomitrella patens]	82.034	0	XM_001783695.1	Physcomitrella patens subsp. patens predicted protein (PHYPADRAFT_199581) mRNA, complete cds	-	-	-	-	-	75.6	3.5e-118	sp|Q9FM19|HIR1_ARATH	Hypersensitive-induced response protein 1 OS=Arabidopsis thaliana GN=HIR1 PE=1 SV=1	--	--	--	--	--	--	--	At5g62740	Prohibitins and stomatins of the PID superfamily
transcript_HQ_TX_pn_transcript59922/f2p0/1620	1620	85.1	3.5e-208	XP_001783582.1	predicted protein [Physcomitrella patens]	73.626	2.32e-49	XM_003535203.3	PREDICTED: Glycine max threonine dehydratase biosynthetic, chloroplastic (LOC100777200), mRNA	K01754	E4.3.1.19, ilvA, tdcB	threonine dehydratase	4.3.1.19	ko01200; Metabolism; Global and overview maps; Carbon metabolism | ko01230; Metabolism; Global and overview maps; Biosynthesis of amino acids | ko00260; Metabolism; Amino acid metabolism; Glycine, serine and threonine metabolism | ko00290; Metabolism; Amino acid metabolism; Valine, leucine and isoleucine biosynthesis	63.6	3e-157	sp|Q9ZSS6|THD1_ARATH	Threonine dehydratase biosynthetic, chloroplastic OS=Arabidopsis thaliana GN=OMR1 PE=1 SV=1	--	--	--	--	--	--	--	At3g10050	Threonine/serine dehydratases
transcript_HQ_TX_pn_transcript27577/f10p0/2370	2371	89.3	1.6e-214	XP_001751477.1	predicted protein [Physcomitrella patens]	80.136	0	XM_001751425.1	Physcomitrella patens subsp. patens predicted protein (PHYPADRAFT_173800) mRNA, complete cds	K00671	E2.3.1.97, NMT	glycylpeptide N-tetradecanoyltransferase	2.3.1.97	-	70.5	8.2e-172	sp|Q9LTR9|NMT1_ARATH	Glycylpeptide N-tetradecanoyltransferase 1 OS=Arabidopsis thaliana GN=NMT1 PE=1 SV=2	PF02799:Myristoyl-CoA:protein N-myristoyltransferase, C-terminal domain;PF01233:Myristoyl-CoA:protein N-myristoyltransferase, N-terminal domain	--	--	--	--	GO:0004379	glycylpeptide N-tetradecanoyltransferase activity	Hs10835073	N-myristoyl transferase
transcript_HQ_TX_pn_transcript38323/f11p0/2147	2147	34.7	5.9e-22	APB88777.1	terpene synthase 3 [Anomodon rostratus]	--	--	--	--	--	--	--	--	--	--	--	--	--	--	--	--	--	--	--	--	--	--
transcript_HQ_TX_pn_transcript68100/f10p0/1288	1288	54.2	3.4e-81	XP_001781580.1	predicted protein [Physcomitrella patens]	92.453	1.5e-10	XM_004965510.1	PREDICTED: Setaria italica peroxidase P7-like (LOC101783109), mRNA	K00430	E1.11.1.7	peroxidase	1.11.1.7	ko00940; Metabolism; Biosynthesis of other secondary metabolites; Phenylpropanoid biosynthesis	45.6	8.7e-67	sp|P17180|PER3_ARMRU	Peroxidase C3 OS=Armoracia rusticana GN=PRXC3 PE=3 SV=1	PF00141:Peroxidase	GO:0006979//GO:0055114	response to oxidative stress//oxidation-reduction process	--	--	GO:0004601//GO:0020037	peroxidase activity//heme binding	--	--
transcript_HQ_TX_pn_transcript19270/f4p0/2774	2775	71.8	1.7e-255	XP_001751910.1	predicted protein [Physcomitrella patens]	--	--	--	--	K19327	ANO10, TMEM16K	anoctamin-10	-	-	42.9	1.7e-139	sp|Q0JJZ6|CACLC_ORYSJ	Anoctamin-like protein Os01g0706700 OS=Oryza sativa subsp. japonica GN=Os01g0706700 PE=2 SV=1	PF16178:Dimerisation domain of Ca+-activated chloride-channel, anoctamin	--	--	--	--	GO:0046983	protein dimerization activity	At1g73020	Protein required for meiotic chromosome segregation
transcript_HQ_TX_pn_transcript53670/f2p0/1786	1787	62.3	4e-80	XP_001774405.1	single myb histone protein [Physcomitrella patens]	90.728	3.32e-48	XM_001751471.1	Physcomitrella patens subsp. patens single myb histone protein (SMH1502) mRNA, complete cds	K09422	MYBP	myb proto-oncogene protein, plant	-	-	48.4	2.5e-27	sp|Q8W119|SMH4_MAIZE	Single myb histone 4 OS=Zea mays GN=SMH4 PE=2 SV=1	PF15091:Domain of unknown function (DUF4554);PF00538:linker histone H1 and H5 family	GO:0006334//GO:0042138	nucleosome assembly//meiotic DNA double-strand break formation	GO:0005634//GO:0000786	nucleus//nucleosome	GO:0003677	DNA binding	--	--
transcript_HQ_TX_pn_transcript44519/f9p0/1959	1959	88.2	1.3e-262	AHI15953.1	flavonoid 3',5'-hydroxylase [Pohlia nutans]	97.004	0	KF835378.1	Pohlia nutans isolate MFC53800 flavonoid 3',5'-hydroxylase mRNA, complete cds	-	-	-	-	-	39.1	3.9e-87	sp|Q9SBQ9|F3PH_PETHY	Flavonoid 3'-monooxygenase OS=Petunia hybrida GN=CYP75B2 PE=2 SV=1	PF00067:Cytochrome P450	GO:0055114	oxidation-reduction process	--	--	GO:0020037//GO:0005506//GO:0016705	heme binding//iron ion binding//oxidoreductase activity, acting on paired donors, with incorporation or reduction of molecular oxygen	At5g07990	Cytochrome P450 CYP2 subfamily
transcript_HQ_TX_pn_transcript25958/f2p0/2498	2498	75.8	1.7e-209	XP_001767312.1	predicted protein [Physcomitrella patens]	--	--	--	--	-	-	-	-	-	30.3	1.1e-46	sp|O33804|MURF_STRTO	UDP-N-acetylmuramoyl-tripeptide--D-alanyl-D-alanine ligase OS=Streptomyces toyocaensis GN=murF PE=3 SV=2	PF08245:Mur ligase middle domain;PF02875:Mur ligase family, glutamate ligase domain	GO:0009058	biosynthetic process	--	--	GO:0005524//GO:0016874	ATP binding//ligase activity	--	--
transcript_HQ_TX_pn_transcript18646/f2p0/2742	2742	51.1	4.9e-114	BAL46028.1	Dof transcription factor [Physcomitrella patens]	80.978	8.76e-31	XM_016107267.1	PREDICTED: Arachis duranensis cyclic dof factor 2 (LOC107486705), mRNA	-	-	-	-	-	82	9.3e-26	sp|Q8LFV3|CDF3_ARATH	Cyclic dof factor 3 OS=Arabidopsis thaliana GN=CDF3 PE=1 SV=2	PF02701:Dof domain, zinc finger	GO:0006355	regulation of transcription, DNA-templated	--	--	GO:0003677	DNA binding	--	--
transcript_HQ_TX_pn_transcript3078/f2p0/4031	4032	78.2	0	XP_001759682.1	predicted protein [Physcomitrella patens]	71.263	7.67e-38	XM_019566126.1	PREDICTED: Lupinus angustifolius leucine--tRNA ligase, cytoplasmic-like (LOC109331555), mRNA	K01869	LARS, leuS	leucyl-tRNA synthetase	6.1.1.4	ko00970; Genetic Information Processing; Translation; Aminoacyl-tRNA biosynthesis	61.4	0	sp|F4I116|SYLC_ARATH	Leucine--tRNA ligase, cytoplasmic OS=Arabidopsis thaliana GN=At1g09620 PE=1 SV=1	PF08264:Anticodon-binding domain of tRNA;PF09334:tRNA synthetases class I (M);PF00133:tRNA synthetases class I (I, L, M and V)	GO:0006418	tRNA aminoacylation for protein translation	--	--	GO:0000166//GO:0005524//GO:0004812	nucleotide binding//ATP binding//aminoacyl-tRNA ligase activity	At1g09620	Leucyl-tRNA synthetase
transcript_HQ_TX_pn_transcript40879/f3p0/2111	2111	69.4	5e-167	XP_001764534.1	predicted protein [Physcomitrella patens]	--	--	--	--	K10631	TOPORS	E3 ubiquitin-protein ligase Topors	2.3.2.27	-	45.8	8.7e-48	sp|Q8N9I9|DTX3_HUMAN	Probable E3 ubiquitin-protein ligase DTX3 OS=Homo sapiens GN=DTX3 PE=1 SV=2	PF17123:RING-like zinc finger;PF00097:Zinc finger, C3HC4 type (RING finger);PF16685:zinc RING finger of MSL2;PF04216:Protein involved in formate dehydrogenase formation;PF17121:Zinc finger, C3HC4 type (RING finger);PF11789:Zinc-finger of the MIZ type in Nse subunit;PF14634:zinc-RING finger domain;PF13639:Ring finger domain;PF12861:Anaphase-promoting complex subunit 11 RING-H2 finger;PF12678:RING-…	--	--	GO:0005680//GO:0005737	anaphase-promoting complex//cytoplasm	GO:0061630//GO:0005515//GO:0046872//GO:0004842//GO:0008270	ubiquitin protein ligase activity//protein binding//metal ion binding//ubiquitin-protein transferase activity//zinc ion binding	--	--
transcript_HQ_TX_pn_transcript51187/f13p0/1818	1818	64	2.8e-105	XP_001758316.1	predicted protein [Physcomitrella patens]	--	--	--	--	K18693	DPP1	diacylglycerol diphosphate phosphatase / phosphatidate phosphatase [EC:3.1.3.81 3.1.3.4]	3.1.3.81,3.1.3.4	ko00561; Metabolism; Lipid metabolism; Glycerolipid metabolism | ko00564; Metabolism; Lipid metabolism; Glycerophospholipid metabolism	40.5	1.4e-57	sp|Q8LFD1|LPP3_ARATH	Putative lipid phosphate phosphatase 3, chloroplastic OS=Arabidopsis thaliana GN=LPP3 PE=2 SV=1	--	--	--	--	--	--	--	At3g02600	Lipid phosphate phosphatase and related enzymes of the PAP2 family
transcript_HQ_TX_pn_transcript57573/f13p0/1677	1677	70.8	1.7e-165	XP_001784976.1	predicted protein [Physcomitrella patens]	--	--	--	--	-	-	-	-	-	--	--	--	--	--	--	--	--	--	--	--	--	--
transcript_HQ_TX_pn_transcript12817/f3p0/3083	3083	94.8	0	XP_001759255.1	predicted protein [Physcomitrella patens]	84.93	0	XM_001759203.1	Physcomitrella patens subsp. patens predicted protein (PHYPADRAFT_179471) mRNA, complete cds	K00276	AOC3, AOC2, tynA	primary-amine oxidase	1.4.3.21	ko00260; Metabolism; Amino acid metabolism; Glycine, serine and threonine metabolism | ko00350; Metabolism; Amino acid metabolism; Tyrosine metabolism | ko00360; Metabolism; Amino acid metabolism; Phenylalanine metabolism | ko00410; Metabolism; Metabolism of other amino acids; beta-Alanine metabolism | ko00950; Metabolism; Biosynthesis of other secondary metabolites; Isoquinoline alkaloid biosynt…	42	3.2e-144	sp|Q07121|AMO1_ARTS1	Primary amine oxidase OS=Arthrobacter sp. (strain P1) GN=maoI PE=1 SV=1	PF01179:Copper amine oxidase, enzyme domain;PF02727:Copper amine oxidase, N2 domain;PF02728:Copper amine oxidase, N3 domain	GO:0009308//GO:0055114	amine metabolic process//oxidation-reduction process	--	--	GO:0005507//GO:0008131//GO:0048038	copper ion binding//primary amine oxidase activity//quinone binding	At2g42490	Copper amine oxidase
transcript_HQ_TX_pn_transcript46556/f3p0/1961	1961	59.1	1.7e-172	AHI15953.1	flavonoid 3',5'-hydroxylase [Pohlia nutans]	--	--	--	--	-	-	-	-	-	37.8	5.5e-81	sp|Q42798|C93A1_SOYBN	3,9-dihydroxypterocarpan 6A-monooxygenase OS=Glycine max GN=CYP93A1 PE=1 SV=1	PF00067:Cytochrome P450	GO:0055114	oxidation-reduction process	--	--	GO:0020037//GO:0005506//GO:0016705	heme binding//iron ion binding//oxidoreductase activity, acting on paired donors, with incorporation or reduction of molecular oxygen	At5g07990	Cytochrome P450 CYP2 subfamily
transcript_HQ_TX_pn_transcript43214/f5p0/2037	2037	68.3	1e-209	XP_001763494.1	predicted protein [Physcomitrella patens]	--	--	--	--	K00486	KMO	kynurenine 3-monooxygenase	1.14.13.9	ko00380; Metabolism; Amino acid metabolism; Tryptophan metabolism	24.3	1.8e-18	sp|A5IG23|KMO_LEGPC	Kynurenine 3-monooxygenase OS=Legionella pneumophila (strain Corby) GN=kmo PE=3 SV=1	PF08491:Squalene epoxidase;PF00899:ThiF family;PF00070:Pyridine nucleotide-disulphide oxidoreductase;PF07992:Pyridine nucleotide-disulphide oxidoreductase;PF02737:3-hydroxyacyl-CoA dehydrogenase, NAD binding domain;PF01494:FAD binding domain;PF01134:Glucose inhibited division protein A;PF02558:Ketopantoate reductase PanE/ApbA;PF01266:FAD dependent oxidoreductase	GO:0006631//GO:0008033//GO:0055114	fatty acid metabolic process//tRNA processing//oxidation-reduction process	GO:0016021	integral component of membrane	GO:0008641//GO:0004506//GO:0003857//GO:0008677//GO:0071949//GO:0016491//GO:0050660	small protein activating enzyme activity//squalene monooxygenase activity//3-hydroxyacyl-CoA dehydrogenase activity//2-dehydropantoate 2-reductase activity//FAD binding//oxidoreductase activity//flavin adenine dinucleotide binding	CE06267	Kynurenine 3-monooxygenase and related flavoprotein monooxygenases
transcript_HQ_TX_pn_transcript20709/f24p0/2590	2590	82.8	0	XP_001779396.1	predicted protein [Physcomitrella patens]	80	0	XM_001779344.1	Physcomitrella patens subsp. patens predicted protein (PHYPADRAFT_223402) mRNA, complete cds	K20989	DUR3	urea-proton symporter	-	-	67.4	4.3e-267	sp|F4KD71|DUR3_ARATH	Urea-proton symporter DUR3 OS=Arabidopsis thaliana GN=DUR3 PE=1 SV=1	PF00474:Sodium:solute symporter family	GO:0055085//GO:0006810	transmembrane transport//transport	GO:0016020	membrane	GO:0005215	transporter activity	At5g45380	Urea transporter
transcript_HQ_TX_pn_transcript20903/f2p0/2678	2678	94.7	3.2e-73	XP_001762564.1	predicted protein [Physcomitrella patens]	88.358	1.98e-161	XM_001774712.1	Physcomitrella patens subsp. patens predicted protein (PHYPADRAFT_192539) mRNA, complete cds	K13171	SRRM1, SRM160	serine/arginine repetitive matrix protein 1	-	ko03013; Genetic Information Processing; Translation; RNA transport | ko03015; Genetic Information Processing; Translation; mRNA surveillance pathway	56	3.2e-39	sp|Q8IYB3|SRRM1_HUMAN	Serine/arginine repetitive matrix protein 1 OS=Homo sapiens GN=SRRM1 PE=1 SV=2	PF01480:PWI domain	GO:0006397	mRNA processing	--	--	--	--	At2g29210	Splicing coactivator SRm160/300, subunit SRm160 (contains PWI domain)
transcript_HQ_TX_pn_transcript71881/f4p0/1055	1053	53	6e-36	XP_001755623.1	predicted protein [Physcomitrella patens]	78.325	5.57e-24	XM_001755571.1	Physcomitrella patens subsp. patens predicted protein (PHYPADRAFT_160098) mRNA, complete cds	-	-	-	-	-	--	--	--	--	--	--	--	--	--	--	--	--	--
transcript_HQ_TX_pn_transcript7749/f7p0/3316	3316	57.1	8.2e-156	CAA71838.1	photoreceptor, partial [Ceratodon purpureus]	--	--	--	--	-	-	-	-	-	58	8e-157	sp|P25848|PHY1_CERPU	Light-sensor Protein kinase OS=Ceratodon purpureus GN=PHY1 PE=3 SV=3	PF06293:Lipopolysaccharide kinase (Kdo/WaaP) family;PF07714:Protein tyrosine kinase;PF13676:TIR domain;PF00069:Protein kinase domain;PF01582:TIR domain	GO:0006468//GO:0007165	protein phosphorylation//signal transduction	GO:0016020	membrane	GO:0016773//GO:0004672//GO:0005524//GO:0005515	phosphotransferase activity, alcohol group as acceptor//protein kinase activity//ATP binding//protein binding	At1g64300	Tyrosine kinase specific for activated (GTP-bound) p21cdc42Hs
transcript_HQ_TX_pn_transcript55960/f2p0/1715	1716	42.3	6.8e-45	XP_001765732.1	predicted protein [Physcomitrella patens]	--	--	--	--	-	-	-	-	-	35.5	1.4e-24	sp|P25848|PHY1_CERPU	Light-sensor Protein kinase OS=Ceratodon purpureus GN=PHY1 PE=3 SV=3	PF00069:Protein kinase domain;PF01842:ACT domain;PF07714:Protein tyrosine kinase	GO:0008152//GO:0006468	metabolic process//protein phosphorylation	--	--	GO:0004672//GO:0005524//GO:0016597	protein kinase activity//ATP binding//amino acid binding	At5g41730	Tyrosine kinase specific for activated (GTP-bound) p21cdc42Hs
transcript_HQ_TX_pn_transcript36906/f2p0/2189	2189	61.2	6.9e-26	XP_001761065.1	predicted protein [Physcomitrella patens]	--	--	--	--	-	-	-	-	-	36.9	9.4e-13	sp|F4KD68|WTR43_ARATH	WAT1-related protein At5g45370 OS=Arabidopsis thaliana GN=At5g45370 PE=2 SV=1	PF00892:EamA-like transporter family	--	--	GO:0016021//GO:0016020	integral component of membrane//membrane	--	--	--	--
transcript_HQ_TX_pn_transcript57577/f2p0/1683	1683	40.3	2.2e-24	XP_001762915.1	predicted protein [Physcomitrella patens]	--	--	--	--	-	-	-	-	-	--	--	--	--	PF02025:Interleukin 5	GO:0006955	immune response	GO:0005576	extracellular region	GO:0005137//GO:0008083	interleukin-5 receptor binding//growth factor activity	--	--
transcript_HQ_TX_pn_transcript44844/f4p0/1969	1969	93.2	2.8e-284	AHI15943.1	flavonoid 3'-hydroxylase [Pohlia nutans]	99.27	0	KF835368.1	Pohlia nutans isolate MFC07506 flavonoid 3'-hydroxylase mRNA, complete cds	-	-	-	-	-	34.9	1.9e-73	sp|Q9SD85|F3PH_ARATH	Flavonoid 3'-monooxygenase OS=Arabidopsis thaliana GN=CYP75B1 PE=1 SV=1	PF00067:Cytochrome P450	GO:0055114	oxidation-reduction process	--	--	GO:0005506//GO:0016705//GO:0020037	iron ion binding//oxidoreductase activity, acting on paired donors, with incorporation or reduction of molecular oxygen//heme binding	At5g07990	Cytochrome P450 CYP2 subfamily
transcript_HQ_TX_pn_transcript2487/f2p0/4120	4118	67.7	0	XP_001752321.1	predicted protein [Physcomitrella patens]	--	--	--	--	-	-	-	-	-	26.1	7.4e-43	sp|Q9LM76|PUB44_ARATH	U-box domain-containing protein 44 OS=Arabidopsis thaliana GN=PUB44 PE=1 SV=1	PF00514:Armadillo/beta-catenin-like repeat;PF04564:U-box domain;PF11698:V-ATPase subunit H;PF11789:Zinc-finger of the MIZ type in Nse subunit;PF02985:HEAT repeat	GO:0015991//GO:0016567	ATP hydrolysis coupled proton transport//protein ubiquitination	GO:0000221	vacuolar proton-transporting V-type ATPase, V1 domain	GO:0008270//GO:0004842//GO:0005515//GO:0016820	zinc ion binding//ubiquitin-protein transferase activity//protein binding//hydrolase activity, acting on acid anhydrides, catalyzing transmembrane movement of substances	At1g20780	FOG: Armadillo/beta-catenin-like repeats
transcript_HQ_TX_pn_transcript46461/f3p0/1934	1934	62	3.7e-108	XP_001758535.1	predicted protein [Physcomitrella patens]	80.713	3.96e-162	XM_001758483.1	Physcomitrella patens subsp. patens predicted protein (PHYPADRAFT_161477) mRNA, complete cds	-	-	-	-	-	59.7	8.5e-26	sp|Q94A57|PHL2_ARATH	Protein PHR1-LIKE 2 OS=Arabidopsis thaliana GN=PHL2 PE=1 SV=1	--	--	--	--	--	--	--	--	--
transcript_HQ_TX_pn_transcript29907/f15p0/2345	2345	66.4	5.3e-234	XP_001754160.1	predicted protein [Physcomitrella patens]	86.905	2.75e-15	AJ512819.1	Triticum aestivum stB1.1b gene for sulphate transporter, exons 1-14, genome B	K17470	SULTR1	sulfate transporter 1, high-affinity	-	-	52.2	3.2e-176	sp|Q9SAY1|SUT11_ARATH	Sulfate transporter 1.1 OS=Arabidopsis thaliana GN=SULTR1;1 PE=1 SV=2	PF00916:Sulfate permease family	GO:0008272	sulfate transport	GO:0016021	integral component of membrane	GO:0015116	sulfate transmembrane transporter activity	At4g08620	Sulfate/bicarbonate/oxalate exchanger SAT-1 and related transporters (SLC26 family)
transcript_HQ_TX_pn_transcript51137/f7p0/1819	1819	75.4	5.1e-184	XP_001751301.1	predicted protein [Physcomitrella patens]	74.419	2.11e-20	XM_014664627.1	PREDICTED: Vigna radiata var. radiata putative 12-oxophytodienoate reductase 11 (LOC106777106), mRNA	K05894	OPR	12-oxophytodienoic acid reductase	1.3.1.42	ko00592; Metabolism; Lipid metabolism; alpha-Linolenic acid metabolism	61.9	1.9e-131	sp|B9FSC8|OPR11_ORYSJ	Putative 12-oxophytodienoate reductase 11 OS=Oryza sativa subsp. japonica GN=OPR11 PE=2 SV=1	PF00724:NADH:flavin oxidoreductase / NADH oxidase family	GO:0055114	oxidation-reduction process	--	--	GO:0016491//GO:0010181	oxidoreductase activity//FMN binding	At1g76680	NADH:flavin oxidoreductase/12-oxophytodienoate reductase
transcript_HQ_TX_pn_transcript52487/f2p0/1814	1814	91.5	1.5e-175	XP_001772550.1	predicted protein [Physcomitrella patens]	82.615	0	XM_001772498.1	Physcomitrella patens subsp. patens predicted protein (PHYPADRAFT_190808) mRNA, complete cds	K00948	PRPS, prsA	ribose-phosphate pyrophosphokinase	2.7.6.1	ko01200; Metabolism; Global and overview maps; Carbon metabolism | ko01230; Metabolism; Global and overview maps; Biosynthesis of amino acids | ko00030; Metabolism; Carbohydrate metabolism; Pentose phosphate pathway | ko00230; Metabolism; Nucleotide metabolism; Purine metabolism	87.7	4.1e-155	sp|Q9XG98|KPRS1_SPIOL	Ribose-phosphate pyrophosphokinase 1 OS=Spinacia oleracea GN=PRS1 PE=2 SV=1	PF14572:Phosphoribosyl synthetase-associated domain;PF00156:Phosphoribosyl transferase domain	GO:0009116//GO:0009165	nucleoside metabolic process//nucleotide biosynthetic process	--	--	GO:0004749//GO:0000287	ribose phosphate diphosphokinase activity//magnesium ion binding	At2g44530	Ribose-phosphate pyrophosphokinase
transcript_HQ_TX_pn_transcript53183/f11p0/1780	1780	88.1	1.8e-165	XP_001753698.1	predicted protein [Physcomitrella patens]	87.069	0	XM_001753646.1	Physcomitrella patens subsp. patens predicted protein (PHYPADRAFT_114476) mRNA, complete cds	K03146	THI4, THI1	thiamine thiazole synthase	-	ko00730; Metabolism; Metabolism of cofactors and vitamins; Thiamine metabolism	88.1	1.7e-166	sp|A9RHW6|THI43_PHYPA	Thiamine thiazole synthase 3, chloroplastic OS=Physcomitrella patens subsp. patens GN=THI1-3 PE=3 SV=1	PF07992:Pyridine nucleotide-disulphide oxidoreductase;PF12831:FAD dependent oxidoreductase;PF00732:GMC oxidoreductase;PF01494:FAD binding domain;PF00070:Pyridine nucleotide-disulphide oxidoreductase;PF01266:FAD dependent oxidoreductase;PF01134:Glucose inhibited division protein A	GO:0055114//GO:0008033	oxidation-reduction process//tRNA processing	--	--	GO:0071949//GO:0050660//GO:0016491//GO:0016614	FAD binding//flavin adenine dinucleotide binding//oxidoreductase activity//oxidoreductase activity, acting on CH-OH group of donors	At5g54770	Protein involved in thiamine biosynthesis and DNA damage tolerance
transcript_HQ_TX_pn_transcript40745/f3p0/2101	2101	75.4	1.7e-199	XP_001777279.1	predicted protein [Physcomitrella patens]	--	--	--	--	K14684	SLC25A23S	solute carrier family 25 (mitochondrial phosphate transporter), member 23/24/25/41	-	-	37.5	1.6e-78	sp|Q9BV35|SCMC3_HUMAN	Calcium-binding mitochondrial carrier protein SCaMC-3 OS=Homo sapiens GN=SLC25A23 PE=1 SV=2	PF13499:EF-hand domain pair;PF10591:Secreted protein acidic and rich in cysteine Ca binding region;PF12763:Cytoskeletal-regulatory complex EF hand;PF13833:EF-hand domain pair;PF13202:EF hand;PF13405:EF-hand domain;PF00036:EF hand	GO:0007165	signal transduction	GO:0005578	proteinaceous extracellular matrix	GO:0005509//GO:0005515	calcium ion binding//protein binding	At5g07320	Predicted mitochondrial carrier protein
transcript_HQ_TX_pn_transcript52788/f2p0/1806	1806	56	1.8e-128	OAE22888.1	hypothetical protein AXG93_3544s1000 [Marchantia polymorpha subsp. polymorpha]	86.214	4.87e-146	XM_001771184.1	Physcomitrella patens subsp. patens predicted protein (PHYPADRAFT_17883) mRNA, partial cds	-	-	-	-	-	53.9	1.1e-43	sp|Q93W77|NIFU1_ARATH	NifU-like protein 1, chloroplastic OS=Arabidopsis thaliana GN=NIFU1 PE=1 SV=1	PF01106:NifU-like domain	GO:0016226	iron-sulfur cluster assembly	--	--	GO:0051536//GO:0005506	iron-sulfur cluster binding//iron ion binding	At4g01940	NifU-like domain-containing proteins
transcript_HQ_TX_pn_transcript41649/f5p0/2071	2070	76.3	1.8e-193	XP_001761481.1	predicted protein [Physcomitrella patens]	77.099	1.42e-32	XM_010463209.2	PREDICTED: Camelina sativa cysteine proteinase RD21A-like (LOC104742230), mRNA	-	-	-	-	-	54.8	1.3e-133	sp|P43297|RD21A_ARATH	Cysteine proteinase RD21A OS=Arabidopsis thaliana GN=RD21A PE=1 SV=1	PF03051:Peptidase C1-like family;PF00112:Papain family cysteine protease	GO:0006508	proteolysis	--	--	GO:0004197//GO:0008234	cysteine-type endopeptidase activity//cysteine-type peptidase activity	At1g47128_1	Cysteine proteinase Cathepsin L
transcript_HQ_TX_pn_transcript73722/f3p0/954	954	93.7	6.6e-66	XP_001756273.1	predicted protein [Physcomitrella patens]	--	--	--	--	-	-	-	-	-	60.2	2.3e-40	sp|Q9FN32|YIPL7_ARATH	Protein yippee-like At5g53940 OS=Arabidopsis thaliana GN=At5g53940 PE=2 SV=1	--	--	--	--	--	--	--	At2g40110	Predicted Yippee-type zinc-binding protein
transcript_HQ_TX_pn_transcript26772/f4p0/2470	2470	87.9	2.5e-306	XP_001754468.1	predicted protein [Physcomitrella patens]	77.921	0	XM_001754416.1	Physcomitrella patens subsp. patens predicted protein (PHYPADRAFT_115350) mRNA, complete cds	K00111	glpA, glpD	glycerol-3-phosphate dehydrogenase	1.1.5.3	ko00564; Metabolism; Lipid metabolism; Glycerophospholipid metabolism	65.8	2.1e-239	sp|Q9SS48|SDP6_ARATH	Glycerol-3-phosphate dehydrogenase SDP6, mitochondrial OS=Arabidopsis thaliana GN=SDP6 PE=1 SV=1	PF12831:FAD dependent oxidoreductase;PF07992:Pyridine nucleotide-disulphide oxidoreductase;PF02737:3-hydroxyacyl-CoA dehydrogenase, NAD binding domain;PF01134:Glucose inhibited division protein A;PF00070:Pyridine nucleotide-disulphide oxidoreductase;PF01266:FAD dependent oxidoreductase;PF01494:FAD binding domain	GO:0006631//GO:0008033//GO:0055114	fatty acid metabolic process//tRNA processing//oxidation-reduction process	--	--	GO:0071949//GO:0003857//GO:0016491//GO:0050660	FAD binding//3-hydroxyacyl-CoA dehydrogenase activity//oxidoreductase activity//flavin adenine dinucleotide binding	At3g10370	Glycerol-3-phosphate dehydrogenase
transcript_HQ_TX_pn_transcript67095/f2p0/1354	1354	77.8	5e-128	XP_001760386.1	predicted protein [Physcomitrella patens]	--	--	--	--	-	-	-	-	-	49.4	6.5e-65	sp|P22242|DRPE_CRAPL	Desiccation-related protein PCC13-62 OS=Craterostigma plantagineum PE=2 SV=1	--	--	--	--	--	--	--	--	--
transcript_HQ_TX_pn_transcript70699/f2p0/1166	1166	95.2	7.3e-83	AAC04626.1	centrin [Marsilea vestita]	79.826	5.64e-89	X69220.1	S.dubia mRNA for caltractin	K16465	CETN1	centrin-1	-	-	92.9	1.1e-79	sp|Q06827|CATR_SCHDU	Caltractin OS=Scherffelia dubia PE=1 SV=1	PF12763:Cytoskeletal-regulatory complex EF hand;PF13202:EF hand;PF13499:EF-hand domain pair;PF13833:EF-hand domain pair;PF04963:Sigma-54 factor, core binding domain;PF10591:Secreted protein acidic and rich in cysteine Ca binding region;PF00036:EF hand;PF13405:EF-hand domain	GO:0007165//GO:0006352	signal transduction//DNA-templated transcription, initiation	GO:0005578	proteinaceous extracellular matrix	GO:0003677//GO:0005515//GO:0005509	DNA binding//protein binding//calcium ion binding	Hs4757902	Ca2+-binding protein (centrin/caltractin), EF-Hand superfamily protein
transcript_HQ_TX_pn_transcript58123/f5p0/1625	1625	82	8.7e-143	XP_001759531.1	predicted protein [Physcomitrella patens]	--	--	--	--	K10251	HSD17B12, KAR, IFA38	17beta-estradiol 17-dehydrogenase / very-long-chain 3-oxoacyl-CoA reductase [EC:1.1.1.62 1.1.1.330]	1.1.1.62,1.1.1.330	ko01212; Metabolism; Global and overview maps; Fatty acid metabolism | ko00062; Metabolism; Lipid metabolism; Fatty acid elongation | ko00140; Metabolism; Lipid metabolism; Steroid hormone biosynthesis | ko01040; Metabolism; Lipid metabolism; Biosynthesis of unsaturated fatty acids	49	3.5e-81	sp|Q8L9C4|KCR1_ARATH	Very-long-chain 3-oxoacyl-CoA reductase 1 OS=Arabidopsis thaliana GN=KCR1 PE=1 SV=1	PF00817:impB/mucB/samB family;PF01370:NAD dependent epimerase/dehydratase family;PF02558:Ketopantoate reductase PanE/ApbA	GO:0055114//GO:0006281	oxidation-reduction process//DNA repair	--	--	GO:0003824//GO:0008677//GO:0050662	catalytic activity//2-dehydropantoate 2-reductase activity//coenzyme binding	--	--
transcript_HQ_TX_pn_transcript27053/f7p0/2464	2464	63	5.9e-135	XP_001757346.1	predicted protein [Physcomitrella patens]	78.921	2.96e-179	XM_001757294.1	Physcomitrella patens subsp. patens predicted protein (PHYPADRAFT_70176) mRNA, complete cds	-	-	-	-	-	63.9	7.5e-43	sp|Q94A57|PHL2_ARATH	Protein PHR1-LIKE 2 OS=Arabidopsis thaliana GN=PHL2 PE=1 SV=1	--	--	--	--	--	--	--	--	--
transcript_HQ_TX_pn_transcript4892/f5p0/3700	3700	30.5	1.4e-42	XP_001773049.1	predicted protein [Physcomitrella patens]	--	--	--	--	-	-	-	-	-	33.9	3.2e-37	sp|P25848|PHY1_CERPU	Light-sensor Protein kinase OS=Ceratodon purpureus GN=PHY1 PE=3 SV=3	PF07714:Protein tyrosine kinase;PF00069:Protein kinase domain	GO:0006468	protein phosphorylation	--	--	GO:0005524//GO:0004672	ATP binding//protein kinase activity	At3g46930	Tyrosine kinase specific for activated (GTP-bound) p21cdc42Hs
transcript_HQ_TX_pn_transcript50683/f6p0/1851	1851	35.9	1.6e-68	XP_002980421.1	hypothetical protein SELMODRAFT_112223 [Selaginella moellendorffii]	--	--	--	--	K09843	E1.14.13.93	(+)-abscisic acid 8'-hydroxylase	1.14.13.93	ko00906; Metabolism; Metabolism of terpenoids and polyketides; Carotenoid biosynthesis	33.1	1.3e-60	sp|Q949P1|ABAH1_ARATH	Abscisic acid 8'-hydroxylase 1 OS=Arabidopsis thaliana GN=CYP707A1 PE=2 SV=1	PF00067:Cytochrome P450	GO:0055114	oxidation-reduction process	--	--	GO:0020037//GO:0005506//GO:0016705	heme binding//iron ion binding//oxidoreductase activity, acting on paired donors, with incorporation or reduction of molecular oxygen	At3g19270	Cytochrome P450 CYP4/CYP19/CYP26 subfamilies
transcript_HQ_TX_pn_transcript66699/f2p0/1352	1351	--	--	--	--	--	--	--	--	--	--	--	--	--	--	--	--	--	--	--	--	--	--	--	--	--	--
transcript_HQ_TX_pn_transcript44708/f4p0/1987	1987	39.2	2.6e-40	XP_001765732.1	predicted protein [Physcomitrella patens]	--	--	--	--	-	-	-	-	-	32	2e-22	sp|P25848|PHY1_CERPU	Light-sensor Protein kinase OS=Ceratodon purpureus GN=PHY1 PE=3 SV=3	PF07714:Protein tyrosine kinase;PF06293:Lipopolysaccharide kinase (Kdo/WaaP) family;PF00069:Protein kinase domain	GO:0006468	protein phosphorylation	GO:0016020	membrane	GO:0005524//GO:0016773//GO:0004672	ATP binding//phosphotransferase activity, alcohol group as acceptor//protein kinase activity	At1g62400	Tyrosine kinase specific for activated (GTP-bound) p21cdc42Hs
transcript_HQ_TX_pn_transcript20254/f2p0/2699	2699	68.2	2.2e-154	XP_001768983.1	predicted protein [Physcomitrella patens]	82.026	1.98e-166	XM_001785796.1	Physcomitrella patens subsp. patens predicted protein (PHYPADRAFT_4214) mRNA, partial cds	-	-	-	-	-	39	3.7e-75	sp|Q8L7E9|MCAC1_ARATH	Protein MID1-COMPLEMENTING ACTIVITY 1 OS=Arabidopsis thaliana GN=MCA1 PE=1 SV=1	--	--	--	--	--	--	--	--	--
transcript_HQ_TX_pn_transcript36448/f2p0/2152	2152	69.4	5.6e-214	AHI15954.1	flavonoid 3'-hydroxylase [Pohlia nutans]	83.995	0	KF835379.1	Pohlia nutans isolate MFC85494 flavonoid 3'-hydroxylase mRNA, complete cds	K05280	E1.14.13.21	flavonoid 3'-monooxygenase	1.14.13.21	ko00941; Metabolism; Biosynthesis of other secondary metabolites; Flavonoid biosynthesis | ko00944; Metabolism; Biosynthesis of other secondary metabolites; Flavone and flavonol biosynthesis	32.1	2.8e-70	sp|Q9SD85|F3PH_ARATH	Flavonoid 3'-monooxygenase OS=Arabidopsis thaliana GN=CYP75B1 PE=1 SV=1	PF00067:Cytochrome P450	GO:0055114	oxidation-reduction process	--	--	GO:0005506//GO:0016705//GO:0020037	iron ion binding//oxidoreductase activity, acting on paired donors, with incorporation or reduction of molecular oxygen//heme binding	At5g07990	Cytochrome P450 CYP2 subfamily
transcript_HQ_TX_pn_transcript28307/f7p0/2413	2413	35.4	1.4e-104	B3Y522.1	RecName: Full=Dammaradiene synthase	--	--	--	--	K01853	CAS1	cycloartenol synthase	5.4.99.8	ko00100; Metabolism; Lipid metabolism; Steroid biosynthesis	41.4	1.8e-137	sp|P33247|SQHC_ALIAD	Squalene--hopene cyclase OS=Alicyclobacillus acidocaldarius subsp. acidocaldarius (strain ATCC 27009 / DSM 446 / JCM 5260 / NBRC 15652 / NCIMB 11725 / NRRL B-14509 / 104-1A) GN=shc PE=1 SV=4	PF07678:A-macroglobulin complement component;PF00432:Prenyltransferase and squalene oxidase repeat	--	--	GO:0005615	extracellular space	GO:0003824	catalytic activity	At1g78970	Oxidosqualene-lanosterol cyclase and related proteins
transcript_HQ_TX_pn_transcript26330/f2p0/2489	2486	68.4	2.1e-34	ABI64130.1	WRKY transcription factor 3, partial [Physcomitrella patens]	77.297	4.64e-48	DQ889622.1	Physcomitrella patens WRKY transcription factor 3 (WRKY3) mRNA, partial cds	-	-	-	-	-	70.7	9.9e-27	sp|Q9C983|WRK57_ARATH	Probable WRKY transcription factor 57 OS=Arabidopsis thaliana GN=WRKY57 PE=2 SV=1	PF03106:WRKY DNA -binding domain	GO:0006355	regulation of transcription, DNA-templated	--	--	GO:0003700//GO:0043565	transcription factor activity, sequence-specific DNA binding//sequence-specific DNA binding	--	--
transcript_HQ_TX_pn_transcript18443/f4p0/2762	2762	78.7	1.2e-40	XP_001778298.1	predicted protein [Physcomitrella patens]	90.361	1.84e-52	XM_001778247.1	Physcomitrella patens subsp. patens predicted protein (PHYPADRAFT_145977) mRNA, complete cds	-	-	-	-	-	50.8	2.1e-30	sp|Q9LUA9|COL10_ARATH	Zinc finger protein CONSTANS-LIKE 10 OS=Arabidopsis thaliana GN=COL10 PE=1 SV=1	PF06203:CCT motif;PF00643:B-box zinc finger	--	--	GO:0005622	intracellular	GO:0008270//GO:0005515	zinc ion binding//protein binding	--	--
transcript_HQ_TX_pn_transcript54566/f13p0/1745	1745	81.3	4.3e-95	XP_001773606.1	predicted protein [Physcomitrella patens]	--	--	--	--	K10666	RNF5	E3 ubiquitin-protein ligase RNF5	2.3.2.27	ko04141; Genetic Information Processing; Folding, sorting and degradation; Protein processing in endoplasmic reticulum	42.9	1.4e-27	sp|Q5RFK9|RN185_PONAB	E3 ubiquitin-protein ligase RNF185 OS=Pongo abelii GN=RNF185 PE=2 SV=1	PF14634:zinc-RING finger domain;PF16685:zinc RING finger of MSL2;PF12861:Anaphase-promoting complex subunit 11 RING-H2 finger;PF00097:Zinc finger, C3HC4 type (RING finger);PF13639:Ring finger domain;PF04564:U-box domain;PF12678:RING-H2 zinc finger domain	GO:0016567	protein ubiquitination	GO:0005680	anaphase-promoting complex	GO:0004842//GO:0005515//GO:0046872//GO:0008270//GO:0061630	ubiquitin-protein transferase activity//protein binding//metal ion binding//zinc ion binding//ubiquitin protein ligase activity	At2g23780	Predicted E3 ubiquitin ligase
transcript_HQ_TX_pn_transcript69864/f2p0/1187	1187	60.7	1.5e-43	XP_001770197.1	predicted protein [Physcomitrella patens]	--	--	--	--	-	-	-	-	-	--	--	--	--	--	--	--	--	--	--	--	--	--
transcript_HQ_TX_pn_transcript70100/f2p0/1208	1208	41	5e-18	XP_001770561.1	predicted protein [Physcomitrella patens]	--	--	--	--	-	-	-	-	-	--	--	--	--	--	--	--	--	--	--	--	--	--
transcript_HQ_TX_pn_transcript7742/f2p0/3293	3295	66.9	3e-275	XP_001765211.1	predicted protein [Physcomitrella patens]	--	--	--	--	-	-	-	-	-	28.2	3.8e-34	sp|P16157|ANK1_HUMAN	Ankyrin-1 OS=Homo sapiens GN=ANK1 PE=1 SV=3	PF13606:Ankyrin repeat;PF00023:Ankyrin repeat;PF06687:SUR7/PalI family	--	--	GO:0005886	plasma membrane	GO:0005515	protein binding	Hs10947036	Ankyrin
transcript_HQ_TX_pn_transcript30319/f2p0/2365	2365	35.7	5e-22	XP_001752364.1	predicted protein [Physcomitrella patens]	--	--	--	--	--	--	--	--	--	--	--	--	--	--	--	--	--	--	--	--	--	--
transcript_HQ_TX_pn_transcript29123/f14p0/2345	2345	70.8	3.9e-168	XP_001754537.1	predicted protein [Physcomitrella patens]	--	--	--	--	-	-	-	-	-	40.6	2.7e-82	sp|O80644|ACR9_ARATH	ACT domain-containing protein ACR9 OS=Arabidopsis thaliana GN=ACR9 PE=2 SV=1	PF13291:ACT domain;PF01842:ACT domain	GO:0008152	metabolic process	--	--	GO:0016597	amino acid binding	--	--
transcript_HQ_TX_pn_transcript50970/f39p0/1836	1836	89.1	6e-249	XP_001781039.1	predicted protein [Physcomitrella patens]	85.207	0	XM_001780987.1	Physcomitrella patens subsp. patens predicted protein (PHYPADRAFT_171465) mRNA, complete cds	K00927	PGK, pgk	phosphoglycerate kinase	2.7.2.3	ko01200; Metabolism; Global and overview maps; Carbon metabolism | ko01230; Metabolism; Global and overview maps; Biosynthesis of amino acids | ko00010; Metabolism; Carbohydrate metabolism; Glycolysis / Gluconeogenesis | ko00710; Metabolism; Energy metabolism; Carbon fixation in photosynthetic organisms	32.5	5.4e-38	sp|Q2RLU1|PGK_MOOTA	Phosphoglycerate kinase OS=Moorella thermoacetica (strain ATCC 39073 / JCM 9320) GN=pgk PE=3 SV=1	PF00162:Phosphoglycerate kinase	GO:0006096	glycolytic process	--	--	GO:0004618	phosphoglycerate kinase activity	At1g79550	3-phosphoglycerate kinase
transcript_HQ_TX_pn_transcript34783/f3p0/2226	2226	69.1	1.7e-11	XP_001766303.1	the plant-specific RNA polymerase IV largest subunit-like protein [Physcomitrella patens]	--	--	--	--	K16251	NRPE1	DNA-directed RNA polymerase V subunit 1	2.7.7.6	-	--	--	--	--	--	--	--	--	--	--	--	--	--
transcript_HQ_TX_pn_transcript14616/f2p0/2930	2932	88.9	3.8e-237	XP_001776148.1	predicted protein [Physcomitrella patens]	82.236	0	XM_001776096.1	Physcomitrella patens subsp. patens predicted protein (PHYPADRAFT_220881) mRNA, complete cds	K00600	glyA, SHMT	glycine hydroxymethyltransferase	2.1.2.1	ko01200; Metabolism; Global and overview maps; Carbon metabolism | ko01230; Metabolism; Global and overview maps; Biosynthesis of amino acids | ko00630; Metabolism; Carbohydrate metabolism; Glyoxylate and dicarboxylate metabolism | ko00680; Metabolism; Energy metabolism; Methane metabolism | ko00260; Metabolism; Amino acid metabolism; Glycine, serine and threonine metabolism | ko00460; Metabolism…	62.5	4.9e-182	sp|Q84WV0|GLYC7_ARATH	Serine hydroxymethyltransferase 7 OS=Arabidopsis thaliana GN=SHM7 PE=2 SV=1	PF00464:Serine hydroxymethyltransferase;PF01212:Beta-eliminating lyase;PF00155:Aminotransferase class I and II	GO:0009058//GO:0006520	biosynthetic process//cellular amino acid metabolic process	--	--	GO:0030170//GO:0016829//GO:0016740	pyridoxal phosphate binding//lyase activity//transferase activity	At1g36370	Glycine/serine hydroxymethyltransferase
transcript_HQ_TX_pn_transcript14656/f25p0/2865	2865	87	6.5e-93	XP_001753461.1	predicted protein [Physcomitrella patens]	--	--	--	--	K03100	lepB, TPP	signal peptidase I	3.4.21.89	ko03060; Genetic Information Processing; Folding, sorting and degradation; Protein export | ko02024; Cellular Processes; Cellular community - prokaryotes; Quorum sensing	61.7	1.3e-67	sp|Q8H0W1|PLSP1_ARATH	Chloroplast processing peptidase OS=Arabidopsis thaliana GN=PLSP1 PE=2 SV=2	--	--	--	--	--	--	--	At1g06870	Mitochondrial inner membrane protease, subunit IMP1
transcript_HQ_TX_pn_transcript44190/f2p0/1991	1991	67.8	9.8e-104	XP_001763877.1	predicted protein [Physcomitrella patens]	77.65	1.22e-107	XM_001754624.1	Physcomitrella patens subsp. patens predicted protein (PHYPADRAFT_159652) mRNA, complete cds	-	-	-	-	-	--	--	--	--	--	--	--	--	--	--	--	--	--
transcript_HQ_TX_pn_transcript63050/f2p0/1511	1511	47.1	4e-41	XP_001783543.1	predicted protein [Physcomitrella patens]	--	--	--	--	-	-	-	-	-	39	1.2e-06	sp|O88846|RNF4_RAT	E3 ubiquitin-protein ligase RNF4 OS=Rattus norvegicus GN=Rnf4 PE=1 SV=1	PF12678:RING-H2 zinc finger domain;PF13639:Ring finger domain;PF12861:Anaphase-promoting complex subunit 11 RING-H2 finger;PF11789:Zinc-finger of the MIZ type in Nse subunit;PF14634:zinc-RING finger domain;PF00097:Zinc finger, C3HC4 type (RING finger);PF17123:RING-like zinc finger;PF16685:zinc RING finger of MSL2	--	--	GO:0005680	anaphase-promoting complex	GO:0004842//GO:0046872//GO:0005515//GO:0008270//GO:0061630	ubiquitin-protein transferase activity//metal ion binding//protein binding//zinc ion binding//ubiquitin protein ligase activity	At3g07200	Predicted E3 ubiquitin ligase
transcript_HQ_TX_pn_transcript20626/f13p0/2539	2539	88.8	3.8e-286	XP_001766814.1	predicted protein [Physcomitrella patens]	84.157	0	XM_001766762.1	Physcomitrella patens subsp. patens predicted protein (PHYPADRAFT_165372) mRNA, complete cds	-	-	-	-	-	49.9	6.6e-119	sp|Q9NBK5|TRC_DROME	Serine/threonine-protein kinase tricorner OS=Drosophila melanogaster GN=trc PE=1 SV=1	PF00433:Protein kinase C terminal domain;PF05445:Poxvirus serine/threonine protein kinase;PF00069:Protein kinase domain;PF07714:Protein tyrosine kinase	GO:0006468	protein phosphorylation	--	--	GO:0005524//GO:0004674//GO:0004672	ATP binding//protein serine/threonine kinase activity//protein kinase activity	At3g23310	NDR and related serine/threonine kinases
transcript_HQ_TX_pn_transcript63684/f6p0/1461	1461	84.4	1.9e-141	XP_001769621.1	predicted protein [Physcomitrella patens]	--	--	--	--	-	-	-	-	-	57.1	1e-92	sp|O80775|WDR55_ARATH	WD repeat-containing protein 55 OS=Arabidopsis thaliana GN=WDR55 PE=1 SV=2	PF00400:WD domain, G-beta repeat	--	--	--	--	GO:0005515	protein binding	7299504	WD40 repeat protein
transcript_HQ_TX_pn_transcript11698/f2p0/3117	3118	73.1	1.1e-189	XP_001757336.1	predicted protein [Physcomitrella patens]	82.983	0	XM_001757284.1	Physcomitrella patens subsp. patens predicted protein (PHYPADRAFT_119139) mRNA, partial cds	K01099	INPP5B_F	inositol polyphosphate 5-phosphatase INPP5B/F	3.1.3.36	ko00562; Metabolism; Carbohydrate metabolism; Inositol phosphate metabolism | ko04070; Environmental Information Processing; Signal transduction; Phosphatidylinositol signaling system	38.6	7.2e-99	sp|Q8GTS0|IP5P4_ARATH	Type I inositol polyphosphate 5-phosphatase 4 OS=Arabidopsis thaliana GN=IP5P4 PE=2 SV=1	--	--	--	--	--	--	--	At3g63240	Inositol polyphosphate 5-phosphatase and related proteins
transcript_HQ_TX_pn_transcript48508/f2p0/1896	1895	72.2	3e-142	XP_001754427.1	predicted protein [Physcomitrella patens]	77.113	1.8e-160	XM_001754375.1	Physcomitrella patens subsp. patens predicted protein (PHYPADRAFT_21288) mRNA, partial cds	-	-	-	-	-	39.5	5.2e-60	sp|P21269|CCA1_YEAST	CCA tRNA nucleotidyltransferase, mitochondrial OS=Saccharomyces cerevisiae (strain ATCC 204508 / S288c) GN=CCA1 PE=1 SV=1	PF01743:Poly A polymerase head domain	GO:0006396	RNA processing	--	--	GO:0003723//GO:0016779	RNA binding//nucleotidyltransferase activity	At1g22660	tRNA nucleotidyltransferase/poly(A) polymerase
transcript_HQ_TX_pn_transcript2468/f3p0/4170	4170	77.1	0	XP_001759616.1	predicted protein [Physcomitrella patens]	81.21	0	XM_001759564.1	Physcomitrella patens subsp. patens predicted protein (PHYPADRAFT_121949) mRNA, complete cds	K17637	EXOC2, SEC5	exocyst complex component 2	-	ko04014; Environmental Information Processing; Signal transduction; Ras signaling pathway	42.9	7.9e-194	sp|F4HWE6|SEC5B_ARATH	Exocyst complex component SEC5B OS=Arabidopsis thaliana GN=SEC5B PE=1 SV=1	PF04124:Dor1-like family ;PF13414:TPR repeat	--	--	GO:0017119	Golgi transport complex	GO:0005515	protein binding	At1g21170	Sec5 subunit of exocyst complex
transcript_HQ_TX_pn_transcript43722/f2p0/1901	1901	64.2	1.7e-44	XP_001757085.1	predicted protein [Physcomitrella patens]	81.385	2.75e-44	XM_001757033.1	Physcomitrella patens subsp. patens predicted protein (PHYPADRAFT_118932) mRNA, complete cds	-	-	-	-	-	53.2	3.1e-28	sp|Q9LUA9|COL10_ARATH	Zinc finger protein CONSTANS-LIKE 10 OS=Arabidopsis thaliana GN=COL10 PE=1 SV=1	PF00643:B-box zinc finger;PF06203:CCT motif	--	--	GO:0005622	intracellular	GO:0008270//GO:0005515	zinc ion binding//protein binding	--	--
transcript_HQ_TX_pn_transcript68061/f2p0/1304	1304	50	1.6e-22	XP_001754671.1	predicted protein [Physcomitrella patens]	--	--	--	--	-	-	-	-	-	--	--	--	--	--	--	--	--	--	--	--	--	--
transcript_HQ_TX_pn_transcript48884/f2p0/1899	1899	--	--	--	--	--	--	--	--	--	--	--	--	--	--	--	--	--	PF08088:Conotoxin I-superfamily	GO:0009405	pathogenesis	GO:0005576	extracellular region	--	--	--	--
transcript_HQ_TX_pn_transcript44121/f2p0/2014	2014	77	1.9e-203	XP_001758899.1	predicted protein [Physcomitrella patens]	83.824	0	XM_001758847.1	Physcomitrella patens subsp. patens predicted protein (PHYPADRAFT_120883) mRNA, complete cds	-	-	-	-	-	44	5.7e-97	sp|Q94JZ8|PUX7_ARATH	Plant UBX domain-containing protein 7 OS=Arabidopsis thaliana GN=PUX7 PE=1 SV=1	PF00789:UBX domain	--	--	--	--	GO:0005515	protein binding	At1g14570	Predicted ubiquitin regulatory protein, contains UAS and UBX domains
transcript_HQ_TX_pn_transcript56894/f11p0/1660	1660	81.5	5.6e-230	XP_001780008.1	predicted protein [Physcomitrella patens]	79.755	0	XM_001779956.1	Physcomitrella patens subsp. patens predicted protein (PHYPADRAFT_196577) mRNA, complete cds	K08232	E1.6.5.4	monodehydroascorbate reductase (NADH)	1.6.5.4	ko00053; Metabolism; Carbohydrate metabolism; Ascorbate and aldarate metabolism	63.4	1.5e-151	sp|Q9LK94|MDAR4_ARATH	Monodehydroascorbate reductase 4, peroxisomal OS=Arabidopsis thaliana GN=MDAR4 PE=1 SV=1	PF07992:Pyridine nucleotide-disulphide oxidoreductase;PF13241:Putative NAD(P)-binding;PF01134:Glucose inhibited division protein A;PF01266:FAD dependent oxidoreductase;PF00070:Pyridine nucleotide-disulphide oxidoreductase	GO:0055114//GO:0006779//GO:0008033//GO:0019354	oxidation-reduction process//porphyrin-containing compound biosynthetic process//tRNA processing//siroheme biosynthetic process	--	--	GO:0043115//GO:0050660//GO:0016491	precorrin-2 dehydrogenase activity//flavin adenine dinucleotide binding//oxidoreductase activity	At3g27820	Monodehydroascorbate/ferredoxin reductase
transcript_HQ_TX_pn_transcript58614/f2p0/1650	1649	74.3	8.2e-72	XP_001758106.1	predicted protein [Physcomitrella patens]	--	--	--	--	-	-	-	-	-	--	--	--	--	--	--	--	--	--	--	--	--	--
transcript_HQ_TX_pn_transcript28973/f2p0/2402	2401	61.2	1.4e-117	XP_001761696.1	predicted protein [Physcomitrella patens]	80.67	0	XM_001774603.1	Physcomitrella patens subsp. patens predicted protein (PHYPADRAFT_168521) mRNA, complete cds	-	-	-	-	-	--	--	--	--	--	--	--	--	--	--	--	--	--
transcript_HQ_TX_pn_transcript25138/f2p0/2449	2449	86.5	9.4e-274	XP_001769041.1	predicted protein [Physcomitrella patens]	77.2	0	XM_001768989.1	Physcomitrella patens subsp. patens predicted protein (PHYPADRAFT_134238) mRNA, complete cds	K06901	pbuG	putative MFS transporter, AGZA family, xanthine/uracil permease	-	-	70.7	1.6e-218	sp|Q9SRK7|AZG1_ARATH	Adenine/guanine permease AZG1 OS=Arabidopsis thaliana GN=AZG1 PE=2 SV=1	PF00860:Permease family;PF16983:Molybdate transporter of MFS superfamily	GO:0006810//GO:0055085//GO:0015689	transport//transmembrane transport//molybdate ion transport	GO:0016020	membrane	GO:0005215//GO:0015098	transporter activity//molybdate ion transmembrane transporter activity	--	--
transcript_HQ_TX_pn_transcript74028/f2p0/922	923	83.9	1.2e-77	XP_001767588.1	predicted protein [Physcomitrella patens]	81.693	1.19e-114	XM_001767536.1	Physcomitrella patens subsp. patens predicted protein (PHYPADRAFT_106732) mRNA, complete cds	K07304	msrA	peptide-methionine (S)-S-oxide reductase	1.8.4.11	-	61.1	6e-54	sp|P54151|MSRA_BRANA	Peptide methionine sulfoxide reductase OS=Brassica napus GN=PMSR PE=2 SV=1	PF01625:Peptide methionine sulfoxide reductase	GO:0055114	oxidation-reduction process	--	--	GO:0008113	peptide-methionine (S)-S-oxide reductase activity	At5g07470	Peptide methionine sulfoxide reductase
transcript_HQ_TX_pn_transcript60873/f3p0/1571	1570	91.9	7.3e-147	XP_001753387.1	predicted protein [Physcomitrella patens]	86.517	3.93e-17	CP019101.1	Spirodela polyrhiza strain 9509 chromosome 9 sequence	K15283	SLC35E1	solute carrier family 35, member E1	-	-	71.9	2.8e-128	sp|Q69VR7|PPT1_ORYSJ	Phosphoenolpyruvate/phosphate translocator 1, chloroplastic OS=Oryza sativa subsp. japonica GN=PPT1 PE=2 SV=1	PF00892:EamA-like transporter family;PF08449:UAA transporter family	GO:0055085	transmembrane transport	GO:0016020//GO:0016021	membrane//integral component of membrane	--	--	At5g33320	Glucose-6-phosphate/phosphate and phosphoenolpyruvate/phosphate antiporter
transcript_HQ_TX_pn_transcript14115/f2p0/2972	2973	73.3	4e-210	XP_001769703.1	predicted protein [Physcomitrella patens]	84.286	0	XM_001769651.1	Physcomitrella patens subsp. patens predicted protein (PHYPADRAFT_215592) mRNA, complete cds	-	-	-	-	-	25.8	4.1e-35	sp|Q96DM3|MIC1_HUMAN	Uncharacterized protein C18orf8 OS=Homo sapiens GN=C18orf8 PE=1 SV=2	--	--	--	--	--	--	--	At3g12010	Uncharacterized conserved protein
transcript_HQ_TX_pn_transcript1977/f3p0/4253	4253	56.1	9.9e-247	XP_001752567.1	predicted protein [Physcomitrella patens]	--	--	--	--	-	-	-	-	-	35.2	3.5e-72	sp|Q93XX4|C2D61_ARATH	C2 domain-containing protein At1g53590 OS=Arabidopsis thaliana GN=NTMC2T6.1 PE=1 SV=2	PF00168:C2 domain;PF15146:Fanconi anemia-associated	GO:0006281	DNA repair	GO:0043240	Fanconi anaemia nuclear complex	GO:0005515	protein binding	At1g53590	Ca2+-dependent lipid-binding protein CLB1/vesicle protein vp115/Granuphilin A, contains C2 domain
transcript_HQ_TX_pn_transcript51903/f10p0/1827	1827	85.6	8e-262	AHI15943.1	flavonoid 3'-hydroxylase [Pohlia nutans]	94.795	0	KF835368.1	Pohlia nutans isolate MFC07506 flavonoid 3'-hydroxylase mRNA, complete cds	-	-	-	-	-	33	1.7e-71	sp|P48418|C75A1_PETHY	Flavonoid 3',5'-hydroxylase 1 OS=Petunia hybrida GN=CYP75A1 PE=2 SV=1	PF00067:Cytochrome P450	GO:0055114	oxidation-reduction process	--	--	GO:0016705//GO:0005506//GO:0020037	oxidoreductase activity, acting on paired donors, with incorporation or reduction of molecular oxygen//iron ion binding//heme binding	At5g07990	Cytochrome P450 CYP2 subfamily
transcript_HQ_TX_pn_transcript28780/f2p0/2411	2411	59.5	1.9e-117	XP_001763992.1	predicted protein [Physcomitrella patens]	84.26	0	XM_001763940.1	Physcomitrella patens subsp. patens predicted protein (PHYPADRAFT_164115) mRNA, complete cds	-	-	-	-	-	35.5	3.8e-23	sp|Q0WMN5|Y3913_ARATH	Uncharacterized protein At3g49140 OS=Arabidopsis thaliana GN=At3g49140 PE=1 SV=2	--	--	--	--	--	--	--	At3g59300	FOG: PPR repeat
transcript_HQ_TX_pn_transcript53491/f2p0/1789	1789	90.2	1.4e-130	XP_001757116.1	predicted protein [Physcomitrella patens]	--	--	--	--	K12850	PRPF38B	pre-mRNA-splicing factor 38B	-	ko03040; Genetic Information Processing; Transcription; Spliceosome	72.8	1.1e-96	sp|Q8RWB1|SRL1_ARATH	Pre-mRNA splicing factor SR-like 1 OS=Arabidopsis thaliana GN=SRL1 PE=1 SV=1	--	--	--	--	--	--	--	At5g37370	Putative RNA binding protein
transcript_HQ_TX_pn_transcript28343/f2p0/2387	2385	81.8	3.3e-223	XP_001752682.1	predicted protein [Physcomitrella patens]	71.333	7.66e-26	XM_001757742.1	Physcomitrella patens subsp. patens predicted protein (PHYPADRAFT_119507) mRNA, complete cds	-	-	-	-	-	57.2	1.2e-141	sp|Q8VZP6|GUX8_ARATH	Putative glucuronosyltransferase PGSIP8 OS=Arabidopsis thaliana GN=PGSIP8 PE=2 SV=1	PF11051:Mannosyltransferase putative	GO:0006486	protein glycosylation	--	--	GO:0016757	transferase activity, transferring glycosyl groups	At2g35710	Glycosyl transferase, family 8 - glycogenin
transcript_HQ_TX_pn_transcript51562/f2p0/1832	1832	84.6	2.6e-196	XP_001775995.1	predicted protein [Physcomitrella patens]	86.667	0	XM_001775943.1	Physcomitrella patens subsp. patens predicted protein (PHYPADRAFT_220786) mRNA, complete cds	K00161	PDHA, pdhA	pyruvate dehydrogenase E1 component alpha subunit	1.2.4.1	ko01200; Metabolism; Global and overview maps; Carbon metabolism | ko00010; Metabolism; Carbohydrate metabolism; Glycolysis / Gluconeogenesis | ko00020; Metabolism; Carbohydrate metabolism; Citrate cycle (TCA cycle) | ko00620; Metabolism; Carbohydrate metabolism; Pyruvate metabolism | ko04066; Environmental Information Processing; Signal transduction; HIF-1 signaling pathway | ko04922; Organismal…	79.6	1.1e-176	sp|O24457|ODPA3_ARATH	Pyruvate dehydrogenase E1 component subunit alpha-3, chloroplastic OS=Arabidopsis thaliana GN=PDH-E1 ALPHA PE=2 SV=1	PF02775:Thiamine pyrophosphate enzyme, C-terminal TPP binding domain;PF13292:1-deoxy-D-xylulose-5-phosphate synthase;PF00676:Dehydrogenase E1 component	GO:0016114//GO:0008152	terpenoid biosynthetic process//metabolic process	--	--	GO:0003824//GO:0030976//GO:0016624//GO:0008661	catalytic activity//thiamine pyrophosphate binding//oxidoreductase activity, acting on the aldehyde or oxo group of donors, disulfide as acceptor//1-deoxy-D-xylulose-5-phosphate synthase activity	At1g01090	Pyruvate dehydrogenase E1, alpha subunit
transcript_HQ_TX_pn_transcript65710/f2p0/1367	1367	57.6	1.5e-26	XP_001754914.1	predicted protein [Physcomitrella patens]	--	--	--	--	-	-	-	-	-	59.3	4.6e-18	sp|Q9LPE8|ERF14_ARATH	Ethylene-responsive transcription factor ERF014 OS=Arabidopsis thaliana GN=ERF014 PE=2 SV=1	PF00847:AP2 domain	GO:0006355	regulation of transcription, DNA-templated	--	--	GO:0003700	transcription factor activity, sequence-specific DNA binding	--	--
transcript_HQ_TX_pn_transcript76210/f2p0/668	668	73.5	1.6e-18	XP_001754200.1	predicted protein [Physcomitrella patens]	--	--	--	--	-	-	-	-	-	--	--	--	--	--	--	--	--	--	--	--	At1g27330	Predicted membrane protein
transcript_HQ_TX_pn_transcript25885/f3p0/2488	2488	90.6	2.4e-277	APU94844.1	leucine-rich repeat receptor-like protein kinase [Pohlia nutans]	98.382	0	KX159240.1	Pohlia nutans leucine-rich repeat receptor-like protein kinase (LRR-RLK16) mRNA, complete cds	-	-	-	-	-	42.2	7.3e-70	sp|Q9SKB2|SBIR1_ARATH	Leucine-rich repeat receptor-like serine/threonine/tyrosine-protein kinase SOBIR1 OS=Arabidopsis thaliana GN=SOBIR1 PE=1 SV=1	PF07714:Protein tyrosine kinase;PF00069:Protein kinase domain	GO:0006468	protein phosphorylation	--	--	GO:0005524//GO:0004672	ATP binding//protein kinase activity	--	--
transcript_HQ_TX_pn_transcript59412/f2p0/1626	1626	74.9	7.2e-89	XP_001772868.1	predicted protein [Physcomitrella patens]	--	--	--	--	-	-	-	-	-	--	--	--	--	--	--	--	--	--	--	--	--	--
transcript_HQ_TX_pn_transcript17715/f2p0/2808	2809	79.1	1.1e-297	XP_001764751.1	predicted protein [Physcomitrella patens]	80.407	0	XM_001764699.1	Physcomitrella patens subsp. patens predicted protein (PHYPADRAFT_184023) mRNA, complete cds	K07195	EXOC7, EXO70	exocyst complex component 7	-	ko04910; Organismal Systems; Endocrine system; Insulin signaling pathway	35.9	9.9e-116	sp|Q9LZD3|E70A1_ARATH	Exocyst complex component EXO70A1 OS=Arabidopsis thaliana GN=EXO70A1 PE=1 SV=1	PF03081:Exo70 exocyst complex subunit	GO:0006887	exocytosis	GO:0000145	exocyst	--	--	At1g54090	Exocyst component protein and related proteins
transcript_HQ_TX_pn_transcript32750/f12p0/2290	2290	52.7	3.1e-109	XP_001756815.1	predicted protein [Physcomitrella patens]	--	--	--	--	-	-	-	-	-	35.7	8.5e-49	sp|Q9FFJ3|PIRL1_ARATH	Plant intracellular Ras-group-related LRR protein 1 OS=Arabidopsis thaliana GN=PIRL1 PE=2 SV=1	PF00560:Leucine Rich Repeat;PF13855:Leucine rich repeat	--	--	--	--	GO:0005515	protein binding	At5g05850	FOG: Leucine rich repeat
transcript_HQ_TX_pn_transcript68009/f11p0/1289	1289	59.4	4.4e-65	XP_001764210.1	predicted protein [Physcomitrella patens]	77.57	1.17e-06	XM_009386129.2	PREDICTED: Musa acuminata subsp. malaccensis glutathione S-transferase 3-like (LOC103971959), mRNA	K00799	GST, gst	glutathione S-transferase	2.5.1.18	ko00480; Metabolism; Metabolism of other amino acids; Glutathione metabolism | ko00980; Metabolism; Xenobiotics biodegradation and metabolism; Metabolism of xenobiotics by cytochrome P450 | ko00982; Metabolism; Xenobiotics biodegradation and metabolism; Drug metabolism - cytochrome P450 | ko05204; Human Diseases; Cancers: Overview; Chemical carcinogenesis | ko05418; Human Diseases; Cardiovascular…	53.8	1.3e-54	sp|P42761|GSTFA_ARATH	Glutathione S-transferase F10 OS=Arabidopsis thaliana GN=GSTF10 PE=1 SV=3	PF13409:Glutathione S-transferase, N-terminal domain;PF13417:Glutathione S-transferase, N-terminal domain;PF02798:Glutathione S-transferase, N-terminal domain	--	--	--	--	GO:0005515	protein binding	At2g30870	Glutathione S-transferase
transcript_HQ_TX_pn_transcript50276/f9p0/1804	1804	61.5	1.1e-167	XP_001779106.1	predicted protein [Physcomitrella patens]	--	--	--	--	-	-	-	-	-	44.4	1.2e-98	sp|Q9C8J6|PLA17_ARATH	Phospholipase A1-Igamma3, chloroplastic OS=Arabidopsis thaliana GN=At1g51440 PE=1 SV=1	PF01764:Lipase (class 3);PF07819:PGAP1-like protein	GO:0006629	lipid metabolic process	--	--	GO:0016788	hydrolase activity, acting on ester bonds	At1g51440	Predicted lipase
transcript_HQ_TX_pn_transcript53092/f3p0/1799	1799	58.8	4.5e-92	XP_001773383.1	predicted protein [Physcomitrella patens]	--	--	--	--	-	-	-	-	-	--	--	--	--	--	--	--	--	--	--	--	--	--
transcript_HQ_TX_pn_transcript75194/f2p0/804	804	--	--	--	--	--	--	--	--	--	--	--	--	--	--	--	--	--	--	--	--	--	--	--	--	--	--
transcript_HQ_TX_pn_transcript24214/f4p0/2536	2536	66.4	3e-113	XP_002978567.1	hypothetical protein SELMODRAFT_443878 [Selaginella moellendorffii]	--	--	--	--	-	-	-	-	-	28.5	1.2e-11	sp|P50108|MNN10_YEAST	Probable alpha-1,6-mannosyltransferase MNN10 OS=Saccharomyces cerevisiae (strain ATCC 204508 / S288c) GN=MNN10 PE=1 SV=1	PF05637:galactosyl transferase GMA12/MNN10 family	--	--	GO:0016021	integral component of membrane	GO:0016757	transferase activity, transferring glycosyl groups	YDR245w	Subunit of Golgi mannosyltransferase complex
transcript_HQ_TX_pn_transcript66708/f4p0/1358	1358	60.5	8.5e-59	XP_001767834.1	predicted protein [Physcomitrella patens]	--	--	--	--	-	-	-	-	-	--	--	--	--	PF16326:ABC transporter C-terminal domain;PF00520:Ion transport protein;PF00957:Synaptobrevin	GO:0055085//GO:0006811//GO:0016192	transmembrane transport//ion transport//vesicle-mediated transport	GO:0016021//GO:0016020	integral component of membrane//membrane	GO:0003677//GO:0005216	DNA binding//ion channel activity	--	--
transcript_HQ_TX_pn_transcript35706/f3p0/2219	2219	38.1	2.6e-33	XP_001754506.1	predicted protein [Physcomitrella patens]	--	--	--	--	-	-	-	-	-	61.7	2.5e-13	sp|O24312|TCMO_POPTM	Trans-cinnamate 4-monooxygenase OS=Populus tremuloides GN=CYP73A13 PE=2 SV=1	PF03184:DDE superfamily endonuclease	--	--	--	--	GO:0003676	nucleic acid binding	At2g30490	Cytochrome P450 CYP2 subfamily
transcript_HQ_TX_pn_transcript31570/f2p0/2331	2331	56.6	1.8e-24	XP_001752661.1	predicted protein [Physcomitrella patens]	--	--	--	--	K04040	chlG, bchG	chlorophyll/bacteriochlorophyll a synthase [EC:2.5.1.62 2.5.1.133]	2.5.1.62,2.5.1.133	ko00860; Metabolism; Metabolism of cofactors and vitamins; Porphyrin and chlorophyll metabolism	54.1	1.3e-20	sp|Q9M3W5|CHLG_AVESA	Chlorophyll synthase, chloroplastic OS=Avena sativa GN=CHLG PE=1 SV=1	--	--	--	--	--	--	--	--	--
transcript_HQ_TX_pn_transcript18153/f3p0/2787	2787	59.7	4.4e-195	XP_001761020.1	predicted protein [Physcomitrella patens]	72.146	6.24e-102	XM_001760968.1	Physcomitrella patens subsp. patens predicted protein (PHYPADRAFT_74241) mRNA, complete cds	-	-	-	-	-	--	--	--	--	--	--	--	--	--	--	--	--	--
transcript_HQ_TX_pn_transcript74634/f6p0/802	802	60.4	1.9e-18	XP_001778082.1	predicted protein [Physcomitrella patens]	--	--	--	--	--	--	--	--	--	--	--	--	--	--	--	--	--	--	--	--	--	--
transcript_HQ_TX_pn_transcript53786/f6p0/1773	1776	81.8	9.4e-199	XP_001783026.1	predicted protein [Physcomitrella patens]	83.12	6.65e-95	XM_001762334.1	Physcomitrella patens subsp. patens predicted protein (PHYPADRAFT_75613) mRNA, complete cds	K21407	-	-	-	-	50.5	2.3e-102	sp|Q8VWF6|SSL3_ARATH	Protein STRICTOSIDINE SYNTHASE-LIKE 3 OS=Arabidopsis thaliana GN=SSL3 PE=2 SV=1	PF03088:Strictosidine synthase;PF01436:NHL repeat;PF01731:Arylesterase	GO:0009058	biosynthetic process	--	--	GO:0004064//GO:0005515//GO:0016844	arylesterase activity//protein binding//strictosidine synthase activity	At1g08470	Predicted alkaloid synthase/Surface mucin Hemomucin
transcript_HQ_TX_pn_transcript32287/f3p0/2311	2311	85.4	8.7e-205	XP_001782455.1	predicted protein [Physcomitrella patens]	83.553	0	XM_001782403.1	Physcomitrella patens subsp. patens predicted protein (PHYPADRAFT_151174) mRNA, complete cds	K13811	PAPSS	3'-phosphoadenosine 5'-phosphosulfate synthase [EC:2.7.7.4 2.7.1.25]	2.7.7.4,2.7.1.25	ko00920; Metabolism; Energy metabolism; Sulfur metabolism | ko00230; Metabolism; Nucleotide metabolism; Purine metabolism | ko00450; Metabolism; Metabolism of other amino acids; Selenocompound metabolism | ko00261; Metabolism; Biosynthesis of other secondary metabolites; Monobactam biosynthesis	72.5	4.2e-173	sp|Q9LIK9|APS1_ARATH	ATP sulfurylase 1, chloroplastic OS=Arabidopsis thaliana GN=APS1 PE=1 SV=1	PF01747:ATP-sulfurylase	--	--	--	--	GO:0004781	sulfate adenylyltransferase (ATP) activity	At3g22890	ATP sulfurylase (sulfate adenylyltransferase)
transcript_HQ_TX_pn_transcript52063/f2p0/1790	1790	60.6	4.1e-45	XP_001765390.1	predicted protein [Physcomitrella patens]	--	--	--	--	K00799	GST, gst	glutathione S-transferase	2.5.1.18	ko00480; Metabolism; Metabolism of other amino acids; Glutathione metabolism | ko00980; Metabolism; Xenobiotics biodegradation and metabolism; Metabolism of xenobiotics by cytochrome P450 | ko00982; Metabolism; Xenobiotics biodegradation and metabolism; Drug metabolism - cytochrome P450 | ko05204; Human Diseases; Cancers: Overview; Chemical carcinogenesis | ko05418; Human Diseases; Cardiovascular…	53	1.4e-35	sp|P42761|GSTFA_ARATH	Glutathione S-transferase F10 OS=Arabidopsis thaliana GN=GSTF10 PE=1 SV=3	--	--	--	--	--	--	--	At2g30870	Glutathione S-transferase
transcript_HQ_TX_pn_transcript34981/f2p0/2238	2238	67	4.4e-222	XP_001756729.1	predicted protein [Physcomitrella patens]	--	--	--	--	K13463	COI-1	coronatine-insensitive protein 1	-	ko04075; Environmental Information Processing; Signal transduction; Plant hormone signal transduction	40.8	3.3e-114	sp|O04197|COI1_ARATH	Coronatine-insensitive protein 1 OS=Arabidopsis thaliana GN=COI1 PE=1 SV=1	PF13516:Leucine Rich repeat;PF12937:F-box-like;PF00646:F-box domain	--	--	--	--	GO:0005515	protein binding	At2g39940	Leucine rich repeat proteins, some proteins contain F-box
transcript_HQ_TX_pn_transcript10554/f8p0/3102	3102	88.2	1.8e-298	XP_001766736.1	predicted protein [Physcomitrella patens]	--	--	--	--	-	-	-	-	-	53	8.5e-185	sp|Q8GYP6|PPR49_ARATH	Pentatricopeptide repeat-containing protein At1g18900 OS=Arabidopsis thaliana GN=At1g18900 PE=2 SV=1	--	--	--	--	--	--	--	At1g18900	FOG: PPR repeat
transcript_HQ_TX_pn_transcript63053/f3p0/1506	1506	85	8.9e-142	XP_001759118.1	predicted protein [Physcomitrella patens]	--	--	--	--	-	-	-	-	-	--	--	--	--	--	--	--	--	--	--	--	--	--
transcript_HQ_TX_pn_transcript43560/f5p0/2019	2019	51.6	4.7e-21	XP_001763387.1	predicted protein [Physcomitrella patens]	--	--	--	--	-	-	-	-	-	--	--	--	--	--	--	--	--	--	--	--	--	--
transcript_HQ_TX_pn_transcript25864/f2p0/2502	2502	70.3	4.3e-266	XP_001782182.1	predicted protein [Physcomitrella patens]	--	--	--	--	K14487	GH3	auxin responsive GH3 gene family	-	ko04075; Environmental Information Processing; Signal transduction; Plant hormone signal transduction	40	5.2e-124	sp|O81829|GH35_ARATH	Indole-3-acetic acid-amido synthetase GH3.5 OS=Arabidopsis thaliana GN=GH3.5 PE=1 SV=1	--	--	--	--	--	--	--	--	--
transcript_HQ_TX_pn_transcript48372/f2p0/1914	1914	--	--	--	--	--	--	--	--	--	--	--	--	--	--	--	--	--	--	--	--	--	--	--	--	--	--
transcript_HQ_TX_pn_transcript5088/f4p0/3707	3707	99.1	4e-58	AGE46167.1	arginine/serine-rich splicing factor SC39 transcript I [Physcomitrella patens]	75.994	3.55e-160	KC440865.1	Physcomitrella patens subsp. patens arginine/serine-rich splicing factor SC39 transcript I (SC39) mRNA, SC39I allele, complete cds, alternatively spliced	K12891	SFRS2	splicing factor, arginine/serine-rich 2	-	ko03040; Genetic Information Processing; Transcription; Spliceosome | ko05168; Human Diseases; Infectious diseases: Viral; Herpes simplex infection	77.7	7.1e-45	sp|Q9FMG4|SC35_ARATH	Serine/arginine-rich splicing factor SC35 OS=Arabidopsis thaliana GN=SC35 PE=1 SV=1	PF00076:RNA recognition motif. (a.k.a. RRM, RBD, or RNP domain)	--	--	--	--	GO:0003676	nucleic acid binding	At5g64200	Predicted splicing factor, SR protein superfamily
transcript_HQ_TX_pn_transcript17103/f8p0/2763	2763	74.1	3.6e-157	XP_001773896.1	predicted protein [Physcomitrella patens]	--	--	--	--	-	-	-	-	-	38.4	3e-64	sp|Q6DBG8|ARAD1_ARATH	Probable arabinosyltransferase ARAD1 OS=Arabidopsis thaliana GN=ARAD1 PE=1 SV=1	--	--	--	--	--	--	--	At3g45400	Acetylglucosaminyltransferase EXT1/exostosin 1
transcript_HQ_TX_pn_transcript67434/f2p0/1336	1336	76.2	5.2e-125	XP_001760386.1	predicted protein [Physcomitrella patens]	--	--	--	--	-	-	-	-	-	52.7	4.9e-65	sp|P22242|DRPE_CRAPL	Desiccation-related protein PCC13-62 OS=Craterostigma plantagineum PE=2 SV=1	--	--	--	--	--	--	--	--	--
transcript_HQ_TX_pn_transcript5708/f9p0/3598	3598	86.3	0	XP_001770614.1	predicted protein [Physcomitrella patens]	82.459	0	XM_001762290.1	Physcomitrella patens subsp. patens predicted protein (PHYPADRAFT_182124) mRNA, complete cds	K18423	CSE1, CAS, XPO2	exportin-2 (importin alpha re-exporter)	-	-	54.2	1.8e-303	sp|Q9ZPY7|XPO2_ARATH	Exportin-2 OS=Arabidopsis thaliana GN=CAS PE=2 SV=1	PF01602:Adaptin N terminal region;PF03378:CAS/CSE protein, C-terminus;PF08506:Cse1;PF03810:Importin-beta N-terminal domain	GO:0016192//GO:0006886	vesicle-mediated transport//intracellular protein transport	GO:0030117	membrane coat	GO:0005515//GO:0008536	protein binding//Ran GTPase binding	At2g46520	Nuclear export receptor CSE1/CAS (importin beta superfamily)
transcript_HQ_TX_pn_transcript43805/f2p0/2022	2022	76.5	4.3e-131	XP_001781101.1	predicted protein [Physcomitrella patens]	--	--	--	--	K20028	ZDHHC2_15_20	palmitoyltransferase ZDHHC2/15/20	2.3.1.225	-	52.6	9.4e-84	sp|Q8VYP5|ZDH14_ARATH	Probable protein S-acyltransferase 14 OS=Arabidopsis thaliana GN=PAT14 PE=2 SV=1	--	--	--	--	--	--	--	At3g60800	Predicted DHHC-type Zn-finger protein
transcript_HQ_TX_pn_transcript40125/f6p0/2041	2041	48.8	5.2e-52	XP_001784196.1	predicted protein [Physcomitrella patens]	--	--	--	--	-	-	-	-	-	43.1	9.4e-07	sp|Q8LGS1|MARD1_ARATH	Protein MARD1 OS=Arabidopsis thaliana GN=MARD1 PE=2 SV=2	--	--	--	--	--	--	--	--	--
transcript_HQ_TX_pn_transcript73350/f4p0/964	964	59.8	3.4e-17	XP_001778082.1	predicted protein [Physcomitrella patens]	--	--	--	--	--	--	--	--	--	--	--	--	--	--	--	--	--	--	--	--	--	--
transcript_HQ_TX_pn_transcript71061/f2p0/1151	1147	76.6	9.5e-136	XP_001775676.1	predicted protein [Physcomitrella patens]	--	--	--	--	-	-	-	-	-	26.8	3.6e-24	sp|Q66KK3|HGH1_XENTR	Protein HGH1 homolog OS=Xenopus tropicalis GN=hgh1 PE=2 SV=1	PF00514:Armadillo/beta-catenin-like repeat;PF02985:HEAT repeat	--	--	--	--	GO:0005515	protein binding	At1g14300	Uncharacterized conserved protein
transcript_HQ_TX_pn_transcript36314/f18p0/2168	2168	82.3	1.4e-127	XP_001770637.1	predicted protein [Physcomitrella patens]	84.251	0	XM_001770585.1	Physcomitrella patens subsp. patens predicted protein (PHYPADRAFT_189047) mRNA, complete cds	K11841	USP10, UBP3	ubiquitin carboxyl-terminal hydrolase 10	3.4.19.12	ko04139; Cellular Processes; Transport and catabolism; Mitophagy - yeast	52.1	4.7e-97	sp|Q9FPS3|UBP24_ARATH	Ubiquitin carboxyl-terminal hydrolase 24 OS=Arabidopsis thaliana GN=UBP24 PE=1 SV=1	PF00443:Ubiquitin carboxyl-terminal hydrolase	GO:0016579	protein deubiquitination	--	--	GO:0036459	thiol-dependent ubiquitinyl hydrolase activity	At4g30890	Ubiquitin-specific protease
transcript_HQ_TX_pn_transcript31410/f2p0/2340	2340	58.6	4.9e-38	XP_001785448.1	predicted protein [Physcomitrella patens]	77.931	1.48e-87	XM_001785396.1	Physcomitrella patens subsp. patens predicted protein (PHYPADRAFT_173478) mRNA, complete cds	-	-	-	-	-	--	--	--	--	--	--	--	--	--	--	--	--	--
transcript_HQ_TX_pn_transcript75441/f3p0/774	774	69.1	7e-50	XP_001765335.1	predicted protein [Physcomitrella patens]	--	--	--	--	-	-	-	-	-	--	--	--	--	PF08198:Thymopoietin protein;PF00168:C2 domain	--	--	--	--	GO:0005515//GO:0003677	protein binding//DNA binding	--	--
transcript_HQ_TX_pn_transcript11457/f4p0/3119	3119	92.3	2.3e-107	XP_001757965.1	predicted protein [Physcomitrella patens]	83.167	1.81e-152	XM_001757913.1	Physcomitrella patens subsp. patens predicted protein (PHYPADRAFT_205920) mRNA, complete cds	K03386	PRDX2_4, ahpC	peroxiredoxin (alkyl hydroperoxide reductase subunit C)	1.11.1.15	ko04214; Cellular Processes; Cell growth and death; Apoptosis - fly	86.2	1.7e-100	sp|Q9C5R8|BAS1B_ARATH	2-Cys peroxiredoxin BAS1-like, chloroplastic OS=Arabidopsis thaliana GN=At5g06290 PE=2 SV=3	PF00578:AhpC/TSA family;PF10417:C-terminal domain of 1-Cys peroxiredoxin;PF08534:Redoxin	GO:0055114	oxidation-reduction process	--	--	GO:0051920//GO:0016491//GO:0016209	peroxiredoxin activity//oxidoreductase activity//antioxidant activity	At5g06290	Alkyl hydroperoxide reductase, thiol specific antioxidant and related enzymes
transcript_HQ_TX_pn_transcript36716/f2p0/2193	2193	57.4	8.6e-53	XP_001761065.1	predicted protein [Physcomitrella patens]	--	--	--	--	-	-	-	-	-	34.4	3.8e-30	sp|F4KD68|WTR43_ARATH	WAT1-related protein At5g45370 OS=Arabidopsis thaliana GN=At5g45370 PE=2 SV=1	PF00892:EamA-like transporter family	--	--	GO:0016020//GO:0016021	membrane//integral component of membrane	--	--	--	--
transcript_HQ_TX_pn_transcript45368/f2p0/1985	1985	82.8	9.2e-195	XP_001784026.1	predicted protein [Physcomitrella patens]	81.211	0	XM_001783974.1	Physcomitrella patens subsp. patens predicted protein (PHYPADRAFT_153126) mRNA, partial cds	-	-	-	-	-	--	--	--	--	--	--	--	--	--	--	--	--	--
transcript_HQ_TX_pn_transcript34560/f5p0/2232	2232	56.6	2.8e-75	XP_001781383.1	predicted protein [Physcomitrella patens]	84.669	3.56e-158	XM_001768068.1	Physcomitrella patens subsp. patens predicted protein (PHYPADRAFT_58339) mRNA, complete cds	-	-	-	-	-	45.2	5.1e-22	sp|O80450|TGT3B_ARATH	Trihelix transcription factor GT-3b OS=Arabidopsis thaliana GN=GT-3B PE=1 SV=1	--	--	--	--	--	--	--	At2g38250	Transcription factor GT-2 and related proteins, contains trihelix DNA-binding/SANT domain
transcript_HQ_TX_pn_transcript7818/f2p0/3415	3412	49.5	4.5e-157	XP_001764602.1	predicted protein [Physcomitrella patens]	82.202	1.6e-123	XM_001764354.1	Physcomitrella patens subsp. patens predicted protein (PHYPADRAFT_164347) mRNA, complete cds	K12126	PIF3	phytochrome-interacting factor 3	-	ko04075; Environmental Information Processing; Signal transduction; Plant hormone signal transduction | ko04712; Organismal Systems; Environmental adaptation; Circadian rhythm - plant	61.2	5.4e-23	sp|O80536|PIF3_ARATH	Transcription factor PIF3 OS=Arabidopsis thaliana GN=PIF3 PE=1 SV=1	PF00010:Helix-loop-helix DNA-binding domain	--	--	--	--	GO:0046983	protein dimerization activity	--	--
transcript_HQ_TX_pn_transcript39367/f20p0/2060	2064	72.8	2.4e-222	XP_001775821.1	predicted protein [Physcomitrella patens]	75.097	0	XM_001762075.1	Physcomitrella patens subsp. patens predicted protein (PHYPADRAFT_109809) mRNA, complete cds	K08176	PHO84	MFS transporter, PHS family, inorganic phosphate transporter	-	-	61.9	2.8e-184	sp|Q8H6H2|PHT14_ORYSJ	Probable inorganic phosphate transporter 1-4 OS=Oryza sativa subsp. japonica GN=PHT1-4 PE=2 SV=1	PF00083:Sugar (and other) transporter;PF07690:Major Facilitator Superfamily;PF09830:ATP adenylyltransferase	GO:0055085	transmembrane transport	GO:0016021	integral component of membrane	GO:0003877//GO:0022857	ATP adenylyltransferase activity//transmembrane transporter activity	At2g32830	Inorganic phosphate transporter
transcript_HQ_TX_pn_transcript9387/f19p0/3254	3254	86	1.1e-165	XP_001767895.1	predicted protein [Physcomitrella patens]	--	--	--	--	-	-	-	-	-	49.6	5.7e-107	sp|Q9XE58|SCL14_ARATH	Scarecrow-like protein 14 OS=Arabidopsis thaliana GN=SCL14 PE=2 SV=2	--	--	--	--	--	--	--	--	--
transcript_HQ_TX_pn_transcript12202/f3p0/3082	3083	54.4	5.2e-189	XP_001760911.1	predicted protein [Physcomitrella patens]	77.174	2.12e-32	XM_001784786.1	Physcomitrella patens subsp. patens predicted protein (PHYPADRAFT_173209) mRNA, complete cds	-	-	-	-	-	--	--	--	--	--	--	--	--	--	--	--	--	--
transcript_HQ_TX_pn_transcript22039/f2p0/2461	2461	77.5	4.2e-165	XP_001761172.1	predicted protein [Physcomitrella patens]	--	--	--	--	-	-	-	-	-	32	3.1e-41	sp|Q5IGR6|EXT1C_DANRE	Exostosin-1c OS=Danio rerio GN=ext1c PE=2 SV=1	--	--	--	--	--	--	--	7303172	Acetylglucosaminyltransferase EXT1/exostosin 1
transcript_HQ_TX_pn_transcript60245/f2p0/1601	1601	71.5	1.3e-87	XP_001780766.1	predicted protein [Physcomitrella patens]	73.13	6.61e-25	XM_017764968.1	PREDICTED: Gossypium arboreum ubiquitin receptor RAD23c-like (LOC108464603), mRNA	K10839	RAD23, HR23	UV excision repair protein RAD23	-	ko04141; Genetic Information Processing; Folding, sorting and degradation; Protein processing in endoplasmic reticulum | ko03420; Genetic Information Processing; Replication and repair; Nucleotide excision repair	57.8	1.7e-64	sp|Q84L32|RD23A_ARATH	Probable ubiquitin receptor RAD23a OS=Arabidopsis thaliana GN=RAD23A PE=1 SV=2	PF09280:XPC-binding domain;PF00240:Ubiquitin family;PF02845:CUE domain;PF01299:Lysosome-associated membrane glycoprotein (Lamp)	GO:0006289//GO:0043161	nucleotide-excision repair//proteasome-mediated ubiquitin-dependent protein catabolic process	GO:0016020	membrane	GO:0005515//GO:0003684	protein binding//damaged DNA binding	At1g16190	Nucleotide excision repair factor NEF2, RAD23 component
transcript_HQ_TX_pn_transcript66539/f4p0/1377	1377	67.3	2.2e-62	OAE35068.1	hypothetical protein AXG93_763s1000 [Marchantia polymorpha subsp. polymorpha]	85.077	0	XM_001769797.1	Physcomitrella patens subsp. patens predicted protein (PHYPADRAFT_215712) mRNA, complete cds	K12194	CHMP4, SNF7, VPS32	charged multivesicular body protein 4	-	ko04144; Cellular Processes; Transport and catabolism; Endocytosis	66.2	1.7e-60	sp|Q9SZE4|VP322_ARATH	Vacuolar protein sorting-associated protein 32 homolog 2 OS=Arabidopsis thaliana GN=VPS32.2 PE=1 SV=1	PF01105:emp24/gp25L/p24 family/GOLD;PF03357:Snf7	GO:0006810//GO:0007034	transport//vacuolar transport	GO:0016021	integral component of membrane	--	--	At4g29160	Protein involved in glucose derepression and pre-vacuolar endosome protein sorting
transcript_HQ_TX_pn_transcript73432/f9p0/962	962	70.4	6.9e-55	XP_001753044.1	predicted protein [Physcomitrella patens]	--	--	--	--	-	-	-	-	-	--	--	--	--	PF01096:Transcription factor S-II (TFIIS);PF00301:Rubredoxin;PF00096:Zinc finger, C2H2 type;PF01155:Hydrogenase/urease nickel incorporation, metallochaperone, hypA	GO:0006351//GO:0006464	transcription, DNA-templated//cellular protein modification process	--	--	GO:0003676//GO:0016151//GO:0046872//GO:0008270//GO:0005506	nucleic acid binding//nickel cation binding//metal ion binding//zinc ion binding//iron ion binding	--	--
transcript_HQ_TX_pn_transcript27146/f3p0/2453	2453	88.3	4.6e-228	XP_001781065.1	predicted protein [Physcomitrella patens]	83.793	0	XM_001781013.1	Physcomitrella patens subsp. patens predicted protein (PHYPADRAFT_149319) mRNA, complete cds	-	-	-	-	-	49.5	1.9e-118	sp|A7PZL3|PGLR_VITVI	Probable polygalacturonase OS=Vitis vinifera GN=GSVIVT00026920001 PE=1 SV=1	PF00295:Glycosyl hydrolases family 28	GO:0005975	carbohydrate metabolic process	--	--	GO:0004650	polygalacturonase activity	--	--
transcript_HQ_TX_pn_transcript32315/f18p0/2251	2251	85.7	7.8e-259	XP_001757568.1	predicted protein [Physcomitrella patens]	79.153	0	XM_001758746.1	Physcomitrella patens subsp. patens predicted protein (PHYPADRAFT_161624) mRNA, complete cds	K15397	KCS	3-ketoacyl-CoA synthase	2.3.1.199	ko00062; Metabolism; Lipid metabolism; Fatty acid elongation	71.6	2.3e-216	sp|Q9LN49|KCS4_ARATH	3-ketoacyl-CoA synthase 4 OS=Arabidopsis thaliana GN=KCS4 PE=2 SV=1	PF03788:LrgA family;PF08545:3-Oxoacyl-[acyl-carrier-protein (ACP)] synthase III;PF08392:FAE1/Type III polyketide synthase-like protein	GO:0006633	fatty acid biosynthetic process	GO:0016021//GO:0016020	integral component of membrane//membrane	GO:0004315//GO:0016747	3-oxoacyl-[acyl-carrier-protein] synthase activity//transferase activity, transferring acyl groups other than amino-acyl groups	--	--
transcript_HQ_TX_pn_transcript26816/f2p0/2488	2486	84.1	8.3e-153	XP_001777154.1	predicted protein [Physcomitrella patens]	--	--	--	--	K02218	CSNK1, CKI	casein kinase 1	2.7.11.1	ko04011; Environmental Information Processing; Signal transduction; MAPK signaling pathway - yeast | ko04392; Environmental Information Processing; Signal transduction; Hippo signaling pathway -multiple species	54.7	5.5e-102	sp|Q8VYK9|CKL12_ARATH	Casein kinase 1-like protein 12 OS=Arabidopsis thaliana GN=CKL12 PE=2 SV=1	PF00069:Protein kinase domain;PF07714:Protein tyrosine kinase;PF06293:Lipopolysaccharide kinase (Kdo/WaaP) family	GO:0006468	protein phosphorylation	GO:0016020	membrane	GO:0016773//GO:0004672//GO:0005524	phosphotransferase activity, alcohol group as acceptor//protein kinase activity//ATP binding	At4g26100	Casein kinase (serine/threonine/tyrosine protein kinase)
transcript_HQ_TX_pn_transcript33187/f6p0/2266	2267	52.3	7.4e-116	XP_001781142.1	predicted protein [Physcomitrella patens]	--	--	--	--	-	-	-	-	-	44.2	1.8e-06	sp|Q6NLD5|ERF15_ARATH	Ethylene-responsive transcription factor ERF015 OS=Arabidopsis thaliana GN=ERF015 PE=2 SV=1	PF00847:AP2 domain	GO:0006355	regulation of transcription, DNA-templated	--	--	GO:0003700	transcription factor activity, sequence-specific DNA binding	--	--
transcript_HQ_TX_pn_transcript23526/f7p0/2566	2571	79.6	6.1e-167	XP_001761167.1	predicted protein [Physcomitrella patens]	83.162	0	XM_001761115.1	Physcomitrella patens subsp. patens predicted protein (PHYPADRAFT_181161) mRNA, complete cds	-	-	-	-	-	54.3	1.1e-102	sp|Q9M2D2|YU88_ARATH	UPF0187 protein At3g61320, chloroplastic OS=Arabidopsis thaliana GN=At3g61320 PE=2 SV=2	--	--	--	--	--	--	--	--	--
transcript_HQ_TX_pn_transcript63752/f12p0/1439	1439	40.5	7.9e-63	XP_001777223.1	predicted protein [Physcomitrella patens]	--	--	--	--	-	-	-	-	-	--	--	--	--	--	--	--	--	--	--	--	--	--
transcript_HQ_TX_pn_transcript47542/f7p0/1871	1871	62.8	4.7e-132	XP_001781715.1	predicted protein [Physcomitrella patens]	--	--	--	--	-	-	-	-	-	37	2e-64	sp|Q9FKH6|B561P_ARATH	Cytochrome b561 and DOMON domain-containing protein At5g35735 OS=Arabidopsis thaliana GN=At5g35735 PE=2 SV=1	--	--	--	--	--	--	--	At3g25290	Predicted membrane protein, contains DoH and Cytochrome b-561/ferric reductase transmembrane domains
transcript_HQ_TX_pn_transcript8716/f12p0/3246	3246	75.4	1.4e-232	XP_001765641.1	predicted protein [Physcomitrella patens]	--	--	--	--	-	-	-	-	-	49.9	7.6e-144	sp|Q9ZPY9|P4KG4_ARATH	Phosphatidylinositol 4-kinase gamma 4 OS=Arabidopsis thaliana GN=PI4KG4 PE=1 SV=1	PF00240:Ubiquitin family;PF00454:Phosphatidylinositol 3- and 4-kinase	--	--	--	--	GO:0005515//GO:0016301	protein binding//kinase activity	At2g46500_2	Phosphatidylinositol 4-kinase
transcript_HQ_TX_pn_transcript55594/f4p0/1729	1729	92.3	7.4e-92	XP_001751570.1	predicted protein [Physcomitrella patens]	88.078	2.2e-134	XM_001771021.1	Physcomitrella patens subsp. patens predicted protein (PHYPADRAFT_189465) mRNA, complete cds	-	-	-	-	-	--	--	--	--	--	--	--	--	--	--	--	--	--
transcript_HQ_TX_pn_transcript60670/f6p0/1524	1524	67.1	5.3e-102	XP_001784866.1	predicted protein [Physcomitrella patens]	--	--	--	--	-	-	-	-	-	23.7	1.3e-08	sp|Q9ZVD2|NHL13_ARATH	NDR1/HIN1-like protein 13 OS=Arabidopsis thaliana GN=NHL13 PE=2 SV=1	PF00335:Tetraspanin family	--	--	GO:0016021	integral component of membrane	--	--	--	--
transcript_HQ_TX_pn_transcript2670/f5p0/4088	4088	86.3	0	XP_001777594.1	predicted protein [Physcomitrella patens]	86.208	0	XM_001777542.1	Physcomitrella patens subsp. patens predicted protein (PHYPADRAFT_194753) mRNA, complete cds	K20180	VPS16	vacuolar protein sorting-associated protein 16	-	ko04138; Cellular Processes; Transport and catabolism; Autophagy - yeast	56.4	9.2e-272	sp|Q93VQ0|VCL1_ARATH	Protein VACUOLELESS1 OS=Arabidopsis thaliana GN=VCL1 PE=1 SV=1	PF04841:Vps16, N-terminal region;PF04840:Vps16, C-terminal region;PF00140:Sigma-70 factor, region 1.2	GO:0006355//GO:0006352//GO:0006886	regulation of transcription, DNA-templated//DNA-templated transcription, initiation//intracellular protein transport	GO:0005737	cytoplasm	GO:0016987//GO:0003677//GO:0003700	sigma factor activity//DNA binding//transcription factor activity, sequence-specific DNA binding	At2g38020	Vacuolar assembly/sorting protein VPS16
transcript_HQ_TX_pn_transcript23580/f2p0/2581	2581	93.6	5.3e-142	XP_001769312.1	predicted protein [Physcomitrella patens]	85.056	0	XM_001769260.1	Physcomitrella patens subsp. patens predicted protein (PHYPADRAFT_134606) mRNA, complete cds	-	-	-	-	-	31.1	3.7e-32	sp|O07427|MGLL_MYCTU	Monoacylglycerol lipase OS=Mycobacterium tuberculosis (strain ATCC 25618 / H37Rv) GN=Rv0183 PE=1 SV=2	PF01764:Lipase (class 3);PF07819:PGAP1-like protein;PF00326:Prolyl oligopeptidase family;PF00975:Thioesterase domain;PF02129:X-Pro dipeptidyl-peptidase (S15 family);PF02230:Phospholipase/Carboxylesterase	GO:0006508//GO:0006629//GO:0009058	proteolysis//lipid metabolic process//biosynthetic process	--	--	GO:0016787//GO:0016788//GO:0008236	hydrolase activity//hydrolase activity, acting on ester bonds//serine-type peptidase activity	At5g11650	Lysophospholipase
transcript_HQ_TX_pn_transcript40184/f4p0/2103	2103	--	--	--	--	--	--	--	--	--	--	--	--	--	--	--	--	--	--	--	--	--	--	--	--	--	--
transcript_HQ_TX_pn_transcript55518/f5p0/1698	1698	56.2	3.6e-107	XP_001762717.1	predicted protein [Physcomitrella patens]	--	--	--	--	K13066	E2.1.1.68, COMT	caffeic acid 3-O-methyltransferase	2.1.1.68	ko00940; Metabolism; Biosynthesis of other secondary metabolites; Phenylpropanoid biosynthesis	37.2	7.4e-58	sp|Q9FK25|OMT1_ARATH	Flavone 3'-O-methyltransferase 1 OS=Arabidopsis thaliana GN=OMT1 PE=1 SV=1	PF00891:O-methyltransferase;PF08100:Dimerisation domain	--	--	--	--	GO:0046983//GO:0008171	protein dimerization activity//O-methyltransferase activity	At5g54160	Hydroxyindole-O-methyltransferase and related SAM-dependent methyltransferases
transcript_HQ_TX_pn_transcript20106/f7p0/2704	2704	53.8	8e-117	XP_001764135.1	predicted protein [Physcomitrella patens]	--	--	--	--	-	-	-	-	-	27.8	1.4e-10	sp|Q9FHS6|FK119_ARATH	F-box/kelch-repeat protein At5g43190 OS=Arabidopsis thaliana GN=At5g43190 PE=2 SV=1	PF00646:F-box domain;PF12937:F-box-like	--	--	--	--	GO:0005515	protein binding	--	--
transcript_HQ_TX_pn_transcript8633/f4p0/3325	3325	65.9	2e-154	XP_001757508.1	predicted protein [Physcomitrella patens]	76.087	2.61e-121	XM_001784124.1	Physcomitrella patens subsp. patens predicted protein (PHYPADRAFT_3260) mRNA, partial cds	K14508	NPR1	regulatory protein NPR1	-	ko04075; Environmental Information Processing; Signal transduction; Plant hormone signal transduction	52.2	7.4e-94	sp|Q9ZVC2|NPR5_ARATH	Regulatory protein NPR5 OS=Arabidopsis thaliana GN=NPR5 PE=1 SV=1	PF00023:Ankyrin repeat;PF00651:BTB/POZ domain;PF13606:Ankyrin repeat	--	--	--	--	GO:0005515	protein binding	At2g41370	FOG: Ankyrin repeat
transcript_HQ_TX_pn_transcript15505/f30p0/2711	2711	72.9	1.4e-161	XP_001757972.1	predicted protein [Physcomitrella patens]	77.596	2.03e-151	XM_001757920.1	Physcomitrella patens subsp. patens predicted protein (PHYPADRAFT_105242) mRNA, complete cds	-	-	-	-	-	22.6	4.1e-18	sp|Q9M0E1|FBL77_ARATH	F-box/LRR-repeat protein At4g29420 OS=Arabidopsis thaliana GN=At4g29420 PE=2 SV=1	PF12937:F-box-like;PF09026:Centromere protein B dimerisation domain;PF10152:Predicted coiled-coil domain-containing protein (DUF2360);PF03985:Paf1 ;PF04889:Cwf15/Cwc15 cell cycle control protein;PF05432:Bone sialoprotein II (BSP-II);PF04147:Nop14-like family ;PF04931:DNA polymerase phi;PF06213:Cobalamin biosynthesis protein CobT	GO:0006351//GO:0006368//GO:0000398//GO:0007155//GO:0016570//GO:0009236//GO:0001503	transcription, DNA-templated//transcription elongation from RNA polymerase II promoter//mRNA splicing, via spliceosome//cell adhesion//histone modification//cobalamin biosynthetic process//ossification	GO:0005634//GO:0005576//GO:0005681//GO:0016593//GO:0000775//GO:0071203//GO:0032040	nucleus//extracellular region//spliceosomal complex//Cdc73/Paf1 complex//chromosome, centromeric region//WASH complex//small-subunit processome	GO:0005515//GO:0003677//GO:0003887//GO:0003682	protein binding//DNA binding//DNA-directed DNA polymerase activity//chromatin binding	--	--
transcript_HQ_TX_pn_transcript54913/f16p0/1742	1742	91	5.2e-234	XP_001773747.1	predicted protein [Physcomitrella patens]	85.133	0	XM_001773695.1	Physcomitrella patens subsp. patens predicted protein (PHYPADRAFT_218986) mRNA, complete cds	K17255	GDI1_2	Rab GDP dissociation inhibitor	-	-	74.1	2.4e-192	sp|Q96254|GDI1_ARATH	Guanosine nucleotide diphosphate dissociation inhibitor 1 OS=Arabidopsis thaliana GN=GDI1 PE=1 SV=1	PF00996:GDP dissociation inhibitor	GO:0007264	small GTPase mediated signal transduction	--	--	GO:0005092	GDP-dissociation inhibitor activity	At2g44100	RAB proteins geranylgeranyltransferase component A (RAB escort protein)
transcript_HQ_TX_pn_transcript36494/f2p0/2180	2180	82	4.2e-201	XP_001778780.1	predicted protein [Physcomitrella patens]	74.105	1.47e-42	XM_010034923.2	PREDICTED: Eucalyptus grandis beta-glucuronosyltransferase GlcAT14B (LOC104422561), mRNA	K20891	GLCAT14	beta-glucuronosyltransferase	2.4.1.-	-	61.3	2.5e-151	sp|Q9FLD7|GT14A_ARATH	Beta-glucuronosyltransferase GlcAT14A OS=Arabidopsis thaliana GN=GLCAT14A PE=2 SV=1	PF02485:Core-2/I-Branching enzyme	--	--	GO:0016020	membrane	GO:0008375	acetylglucosaminyltransferase activity	At5g39990	Branching enzyme
transcript_HQ_TX_pn_transcript64447/f5p0/1451	1451	64.5	4e-99	XP_001755483.1	predicted protein [Physcomitrella patens]	--	--	--	--	-	-	-	-	-	--	--	--	--	--	--	--	--	--	--	--	--	--
transcript_HQ_TX_pn_transcript8426/f35p0/3324	3324	44.7	3.2e-107	OAE30103.1	hypothetical protein AXG93_1112s1200 [Marchantia polymorpha subsp. polymorpha]	85.645	2.03e-117	XM_001781143.1	Physcomitrella patens subsp. patens predicted protein (PHYPADRAFT_149443) mRNA, partial cds	-	-	-	-	-	71.2	2.5e-65	sp|Q9FU27|C3H2_ORYSJ	Zinc finger CCCH domain-containing protein 2 OS=Oryza sativa subsp. japonica GN=Os01g0192000 PE=2 SV=1	PF00642:Zinc finger C-x8-C-x5-C-x3-H type (and similar)	--	--	--	--	GO:0046872	metal ion binding	At2g19810	CCCH-type Zn-finger protein
transcript_HQ_TX_pn_transcript10384/f2p0/3206	3206	77.9	0	XP_001754170.1	predicted protein [Physcomitrella patens]	78.384	0	XM_001769014.1	Physcomitrella patens subsp. patens predicted protein (PHYPADRAFT_187682) mRNA, complete cds	-	-	-	-	-	48	1.6e-223	sp|O22993|FTSI1_ARATH	Probable inactive ATP-dependent zinc metalloprotease FTSHI 1, chloroplastic OS=Arabidopsis thaliana GN=FTSHI1 PE=1 SV=1	PF00004:ATPase family associated with various cellular activities (AAA);PF05496:Holliday junction DNA helicase ruvB N-terminus;PF01434:Peptidase family M41;PF07728:AAA domain (dynein-related subfamily);PF02367:Threonylcarbamoyl adenosine biosynthesis protein TsaE;PF06068:TIP49 C-terminus;PF07724:AAA domain (Cdc48 subfamily);PF01695:IstB-like ATP binding protein	GO:0006310//GO:0006281//GO:0006508//GO:0002949	DNA recombination//DNA repair//proteolysis//tRNA threonylcarbamoyladenosine modification	--	--	GO:0016887//GO:0009378//GO:0003678//GO:0005524//GO:0004222	ATPase activity//four-way junction helicase activity//DNA helicase activity//ATP binding//metalloendopeptidase activity	At4g23940	AAA+-type ATPase containing the peptidase M41 domain
transcript_HQ_TX_pn_transcript49866/f12p0/1842	1842	86.6	1.2e-188	XP_001754012.1	predicted protein [Physcomitrella patens]	--	--	--	--	-	-	-	-	-	64.2	7.4e-136	sp|O80632|MTP11_ARATH	Metal tolerance protein 11 OS=Arabidopsis thaliana GN=MTP11 PE=2 SV=1	PF01545:Cation efflux family	GO:0055085//GO:0006812	transmembrane transport//cation transport	GO:0016021	integral component of membrane	GO:0008324	cation transmembrane transporter activity	At2g39450	Mitochondrial Fe2+ transporter MMT1 and related transporters (cation diffusion facilitator superfamily)
transcript_HQ_TX_pn_transcript50937/f5p0/1804	1804	73.1	2.3e-184	XP_001773192.1	predicted protein [Physcomitrella patens]	--	--	--	--	K14553	UTP18	U3 small nucleolar RNA-associated protein 18	-	ko03008; Genetic Information Processing; Translation; Ribosome biogenesis in eukaryotes	47.9	7e-115	sp|Q9FMU5|UTP18_ARATH	U3 small nucleolar RNA-associated protein 18 homolog OS=Arabidopsis thaliana GN=At5g14050 PE=1 SV=1	PF00400:WD domain, G-beta repeat;PF07569:TUP1-like enhancer of split;PF01981:Peptidyl-tRNA hydrolase PTH2	GO:0006355	regulation of transcription, DNA-templated	GO:0005634	nucleus	GO:0004045//GO:0005515	aminoacyl-tRNA hydrolase activity//protein binding	At5g14050	WD40 repeat protein
transcript_HQ_TX_pn_transcript38429/f2p0/2150	2150	--	--	--	--	--	--	--	--	--	--	--	--	--	--	--	--	--	--	--	--	--	--	--	--	--	--
transcript_HQ_TX_pn_transcript18633/f3p0/2771	2771	89.8	3.3e-102	XP_001756631.1	predicted protein [Physcomitrella patens]	85.192	7.42e-156	XM_001756579.1	Physcomitrella patens subsp. patens predicted protein (PHYPADRAFT_118219) mRNA, complete cds	-	-	-	-	-	--	--	--	--	--	--	--	--	--	--	--	--	--
transcript_HQ_TX_pn_transcript2613/f3p0/4134	4135	37.2	7.7e-111	XP_001751318.1	predicted protein [Physcomitrella patens]	--	--	--	--	-	-	-	-	-	32.6	1e-07	sp|A8MQN2|LNK1_ARATH	Protein LNK1 OS=Arabidopsis thaliana GN=LNK1 PE=1 SV=1	--	--	--	--	--	--	--	--	--
transcript_HQ_TX_pn_transcript7403/f2p0/3442	3437	92	6.8e-238	XP_001772776.1	predicted protein [Physcomitrella patens]	85.331	0	XM_001772724.1	Physcomitrella patens subsp. patens predicted protein (PHYPADRAFT_139248) mRNA, complete cds	-	-	-	-	-	39.4	4.5e-78	sp|Q6NPN5|FK113_ARATH	F-box/kelch-repeat protein At5g26960 OS=Arabidopsis thaliana GN=At5g26960 PE=2 SV=1	PF01344:Kelch motif;PF12937:F-box-like;PF00646:F-box domain;PF07646:Kelch motif	--	--	--	--	GO:0005515	protein binding	At5g26960	FOG: Kelch repeat
transcript_HQ_TX_pn_transcript9458/f5p0/3274	3274	60.1	3.1e-147	XP_001776768.1	predicted protein [Physcomitrella patens]	76.944	4.35e-109	XM_001784351.1	Physcomitrella patens subsp. patens predicted protein (PHYPADRAFT_200090) mRNA, complete cds	K08472	MLO	mlo protein	-	-	39.8	3.9e-71	sp|O49621|MLO1_ARATH	MLO-like protein 1 OS=Arabidopsis thaliana GN=MLO1 PE=1 SV=1	PF02535:ZIP Zinc transporter;PF03094:Mlo family;PF05887:Procyclic acidic repetitive protein (PARP)	GO:0030001//GO:0006952//GO:0055085	metal ion transport//defense response//transmembrane transport	GO:0016020//GO:0016021	membrane//integral component of membrane	GO:0046873	metal ion transmembrane transporter activity	--	--
transcript_HQ_TX_pn_transcript3794/f7p0/3897	3897	39.1	9.9e-177	XP_012438091.1	PREDICTED: lysine-specific demethylase JMJ25-like [Gossypium raimondii]	--	--	--	--	K15601	KDM3	lysine-specific demethylase 3	1.14.11.-	-	47.6	3.1e-67	sp|Q9SSE9|JMJ25_ARATH	Lysine-specific demethylase JMJ25 OS=Arabidopsis thaliana GN=JMJ25 PE=1 SV=1	--	--	--	--	--	--	--	At4g00990	Putative transcription factor 5qNCA, contains JmjC domain
transcript_HQ_TX_pn_transcript56827/f4p0/1655	1655	79.6	1.6e-160	XP_001768460.1	predicted protein [Physcomitrella patens]	75.824	4.09e-27	XM_008813711.2	PREDICTED: Phoenix dactylifera peroxisomal (S)-2-hydroxy-acid oxidase GLO1-like (LOC103722957), partial mRNA	K11517	HAO	(S)-2-hydroxy-acid oxidase	1.1.3.15	ko01200; Metabolism; Global and overview maps; Carbon metabolism | ko00630; Metabolism; Carbohydrate metabolism; Glyoxylate and dicarboxylate metabolism | ko04146; Cellular Processes; Transport and catabolism; Peroxisome	65.6	4.4e-132	sp|Q9LRR9|GLO1_ARATH	Peroxisomal (S)-2-hydroxy-acid oxidase GLO1 OS=Arabidopsis thaliana GN=GLO1 PE=1 SV=1	PF01070:FMN-dependent dehydrogenase;PF01180:Dihydroorotate dehydrogenase;PF00478:IMP dehydrogenase / GMP reductase domain;PF00977:Histidine biosynthesis protein;PF03060:Nitronate monooxygenase;PF01645:Conserved region in glutamate synthase	GO:0000105//GO:0055114//GO:0006537	histidine biosynthetic process//oxidation-reduction process//glutamate biosynthetic process	GO:0005737	cytoplasm	GO:0016627//GO:0003824//GO:0018580//GO:0016491//GO:0015930//GO:0016638	oxidoreductase activity, acting on the CH-CH group of donors//catalytic activity//nitronate monooxygenase activity//oxidoreductase activity//glutamate synthase activity//oxidoreductase activity, acting on the CH-NH2 group of donors	At3g14420	Glycolate oxidase
transcript_HQ_TX_pn_transcript9593/f2p0/3242	3242	70.8	4.2e-213	XP_001762927.1	HO2c heme oxygenase [Physcomitrella patens]	86.335	0	XM_001753062.1	Physcomitrella patens subsp. patens predicted protein (PHYPADRAFT_201957) mRNA, partial cds	-	-	-	-	-	62.7	2.9e-167	sp|Q84R21|Y1559_ARATH	DUF21 domain-containing protein At1g55930, chloroplastic OS=Arabidopsis thaliana GN=CBSDUFCH2 PE=2 SV=2	--	--	--	--	--	--	--	At3g13070	Predicted membrane protein, contains two CBS domains
transcript_HQ_TX_pn_transcript43834/f3p0/1998	1998	44.5	4.5e-40	XP_001763387.1	predicted protein [Physcomitrella patens]	--	--	--	--	-	-	-	-	-	--	--	--	--	PF00847:AP2 domain	GO:0006355	regulation of transcription, DNA-templated	--	--	GO:0003700	transcription factor activity, sequence-specific DNA binding	--	--
transcript_HQ_TX_pn_transcript16487/f2p0/2752	2752	47.6	1.4e-161	GAQ80606.1	RNA helicase nonsense mRNA reducing factor [Klebsormidium flaccidum]	--	--	--	--	K14326	UPF1, RENT1	regulator of nonsense transcripts 1	3.6.4.-	ko03013; Genetic Information Processing; Translation; RNA transport | ko03015; Genetic Information Processing; Translation; mRNA surveillance pathway	37.9	6.4e-75	sp|Q92900|RENT1_HUMAN	Regulator of nonsense transcripts 1 OS=Homo sapiens GN=UPF1 PE=1 SV=2	PF04851:Type III restriction enzyme, res subunit;PF07652:Flavivirus DEAD domain ;PF05970:PIF1-like helicase;PF01443:Viral (Superfamily 1) RNA helicase;PF00270:DEAD/DEAH box helicase;PF02562:PhoH-like protein	GO:0006281//GO:0019079//GO:0000723	DNA repair//viral genome replication//telomere maintenance	--	--	GO:0005524//GO:0003678//GO:0008026//GO:0016787//GO:0003677//GO:0003676	ATP binding//DNA helicase activity//ATP-dependent helicase activity//hydrolase activity//DNA binding//nucleic acid binding	Hs18375673	RNA helicase nonsense mRNA reducing factor (pNORF1)
transcript_HQ_TX_pn_transcript51170/f6p0/1839	1839	67.4	3.5e-63	XP_001771953.1	predicted protein [Physcomitrella patens]	--	--	--	--	K01247	alkA	DNA-3-methyladenine glycosylase II	3.2.2.21	ko03410; Genetic Information Processing; Replication and repair; Base excision repair	32	9.3e-22	sp|Q92383|MAG1_SCHPO	DNA-3-methyladenine glycosylase 1 OS=Schizosaccharomyces pombe (strain 972 / ATCC 24843) GN=mag1 PE=1 SV=1	PF00730:HhH-GPD superfamily base excision DNA repair protein;PF00598:Influenza Matrix protein (M1)	GO:0006284	base-excision repair	--	--	GO:0003723//GO:0005198	RNA binding//structural molecule activity	At3g50880	3-methyladenine DNA glycosidase
transcript_HQ_TX_pn_transcript73408/f5p0/980	980	--	--	--	--	--	--	--	--	--	--	--	--	--	--	--	--	--	--	--	--	--	--	--	--	--	--
transcript_HQ_TX_pn_transcript6753/f6p0/3403	3403	66.6	1.7e-249	AEB39780.1	pentatricopeptide repeat protein 45 [Funaria hygrometrica]	89.404	4.22e-159	JN204535.1	Timmia megapolitana subsp. bavarica voucher Muhle1611197-1 clone 2 pentatricopeptide repeat protein (PPR) gene, partial cds	-	-	-	-	-	39.1	1.1e-161	sp|Q3E6Q1|PPR32_ARATH	Pentatricopeptide repeat-containing protein At1g11290, chloroplastic OS=Arabidopsis thaliana GN=PCMP-H40 PE=2 SV=1	PF14432:DYW family of nucleic acid deaminases	--	--	--	--	GO:0008270	zinc ion binding	At1g11290	FOG: PPR repeat
transcript_HQ_TX_pn_transcript50794/f2p0/1856	1854	82.7	2.3e-184	XP_001782312.1	predicted protein [Physcomitrella patens]	76.282	4.69e-12	KM216389.1	Triticum aestivum cultivar BS366 12-oxo-phytodienoic acid reductase 2 (OPR2) mRNA, complete cds	K05894	OPR	12-oxophytodienoic acid reductase	1.3.1.42	ko00592; Metabolism; Lipid metabolism; alpha-Linolenic acid metabolism	63.5	9.1e-134	sp|B9FSC8|OPR11_ORYSJ	Putative 12-oxophytodienoate reductase 11 OS=Oryza sativa subsp. japonica GN=OPR11 PE=2 SV=1	PF00724:NADH:flavin oxidoreductase / NADH oxidase family	GO:0055114	oxidation-reduction process	--	--	GO:0010181//GO:0016491	FMN binding//oxidoreductase activity	At1g76690	NADH:flavin oxidoreductase/12-oxophytodienoate reductase
transcript_HQ_TX_pn_transcript30954/f2p0/2350	2350	85.1	9.1e-210	XP_001785743.1	predicted protein [Physcomitrella patens]	83.495	3.41e-44	XM_001755928.1	Physcomitrella patens subsp. patens predicted protein (PHYPADRAFT_68737) mRNA, complete cds	-	-	-	-	-	27.1	1.2e-37	sp|Q9LFV5|FK111_ARATH	F-box/kelch-repeat protein At5g15710 OS=Arabidopsis thaliana GN=At5g15710 PE=2 SV=1	PF07646:Kelch motif;PF00646:F-box domain;PF01344:Kelch motif	--	--	--	--	GO:0005515	protein binding	--	--
transcript_HQ_TX_pn_transcript19591/f2p0/2722	2721	51.1	4.9e-114	BAL46028.1	Dof transcription factor [Physcomitrella patens]	80.978	8.7e-31	XM_016107267.1	PREDICTED: Arachis duranensis cyclic dof factor 2 (LOC107486705), mRNA	-	-	-	-	-	82	9.2e-26	sp|Q8LFV3|CDF3_ARATH	Cyclic dof factor 3 OS=Arabidopsis thaliana GN=CDF3 PE=1 SV=2	PF02701:Dof domain, zinc finger	GO:0006355	regulation of transcription, DNA-templated	--	--	GO:0003677	DNA binding	--	--
transcript_HQ_TX_pn_transcript24591/f12p0/2537	2537	79.6	4.7e-228	XP_001773877.1	predicted protein [Physcomitrella patens]	--	--	--	--	-	-	-	-	-	40.8	4.6e-104	sp|O81629|KLCR1_ARATH	Protein KINESIN LIGHT CHAIN-RELATED 1 OS=Arabidopsis thaliana GN=KLCR1 PE=1 SV=1	PF13176:Tetratricopeptide repeat;PF13181:Tetratricopeptide repeat;PF00515:Tetratricopeptide repeat;PF13374:Tetratricopeptide repeat	--	--	--	--	GO:0005515	protein binding	At4g10840	Kinesin light chain
transcript_HQ_TX_pn_transcript37024/f2p0/2173	2173	63.6	2.9e-202	OAE30908.1	hypothetical protein AXG93_3943s1390 [Marchantia polymorpha subsp. polymorpha]	--	--	--	--	K03294	TC.APA	basic amino acid/polyamine antiporter, APA family	-	-	54.2	6.8e-173	sp|Q84MA5|CAAT1_ARATH	Cationic amino acid transporter 1 OS=Arabidopsis thaliana GN=CAT1 PE=1 SV=1	PF00324:Amino acid permease;PF13520:Amino acid permease	GO:0003333//GO:0006810//GO:0055085	amino acid transmembrane transport//transport//transmembrane transport	GO:0016020	membrane	GO:0015171	amino acid transmembrane transporter activity	At4g21120	Amino acid transporters
transcript_HQ_TX_pn_transcript11334/f2p0/3063	3063	49.5	1.8e-117	XP_001751577.1	predicted protein [Physcomitrella patens]	75.912	5.73e-48	XM_001751525.1	Physcomitrella patens subsp. patens predicted protein (PHYPADRAFT_63945) mRNA, complete cds	-	-	-	-	-	--	--	--	--	--	--	--	--	--	--	--	--	--
transcript_HQ_TX_pn_transcript31803/f9p0/2299	2299	60.3	1.3e-35	BAE80314.1	transcription factor ABI3-like [Physcomitrella patens]	--	--	--	--	-	-	-	-	-	54.1	8.9e-30	sp|P26307|VIV1_MAIZE	Regulatory protein viviparous-1 OS=Zea mays GN=VP1 PE=2 SV=1	PF02362:B3 DNA binding domain	--	--	--	--	GO:0003677	DNA binding	--	--
transcript_HQ_TX_pn_transcript29967/f2p0/2381	2381	--	--	--	--	--	--	--	--	--	--	--	--	--	--	--	--	--	--	--	--	--	--	--	--	--	--
transcript_HQ_TX_pn_transcript35060/f45p0/2195	2195	87.3	3.7e-197	XP_001759185.1	predicted protein [Physcomitrella patens]	73.853	2.5e-35	XM_002458682.1	Sorghum bicolor hypothetical protein, mRNA	-	-	-	-	-	44.3	6.2e-65	sp|Q8BUV8|GP107_MOUSE	Protein GPR107 OS=Mus musculus GN=Gpr107 PE=1 SV=2	PF10192:Rhodopsin-like GPCR transmembrane domain;PF06814:Lung seven transmembrane receptor	GO:0019236//GO:0007186	response to pheromone//G-protein coupled receptor signaling pathway	GO:0016021	integral component of membrane	--	--	At3g09570	G protein-coupled seven transmembrane receptor
transcript_HQ_TX_pn_transcript6864/f2p0/3477	3477	50.1	3.2e-158	XP_001764602.1	predicted protein [Physcomitrella patens]	80.223	5.86e-123	XM_001764354.1	Physcomitrella patens subsp. patens predicted protein (PHYPADRAFT_164347) mRNA, complete cds	K12126	PIF3	phytochrome-interacting factor 3	-	ko04075; Environmental Information Processing; Signal transduction; Plant hormone signal transduction | ko04712; Organismal Systems; Environmental adaptation; Circadian rhythm - plant	41.2	1.6e-22	sp|O80536|PIF3_ARATH	Transcription factor PIF3 OS=Arabidopsis thaliana GN=PIF3 PE=1 SV=1	PF00010:Helix-loop-helix DNA-binding domain	--	--	--	--	GO:0046983	protein dimerization activity	--	--
transcript_HQ_TX_pn_transcript15600/f3p0/2898	2898	60.1	2.8e-216	XP_001782518.1	predicted protein [Physcomitrella patens]	90.291	1.39e-108	XM_001782466.1	Physcomitrella patens subsp. patens predicted protein (PHYPADRAFT_198612) mRNA, complete cds	K00685	ATE1, ate1	arginine-tRNA-protein transferase	2.3.2.8	-	38.3	2.3e-115	sp|Q9ZT48|ATE1_ARATH	Arginyl-tRNA--protein transferase 1 OS=Arabidopsis thaliana GN=ATE1 PE=2 SV=2	PF04377:Arginine-tRNA-protein transferase, C terminus;PF04376:Arginine-tRNA-protein transferase, N terminus	GO:0016598	protein arginylation	--	--	GO:0004057	arginyltransferase activity	At5g05700	Arginyl-tRNA-protein transferase
transcript_HQ_TX_pn_transcript19715/f2p0/2720	2720	62.1	1.6e-117	XP_001772765.1	predicted protein [Physcomitrella patens]	79.118	1.06e-69	XM_001772713.1	Physcomitrella patens subsp. patens predicted protein (PHYPADRAFT_167666) mRNA, complete cds	-	-	-	-	-	--	--	--	--	PF04504:Protein of unknown function, DUF573	GO:0006355	regulation of transcription, DNA-templated	--	--	--	--	--	--
transcript_HQ_TX_pn_transcript10633/f4p0/3174	3174	75.1	0	XP_001775275.1	predicted protein [Physcomitrella patens]	84.028	1.7e-28	KF977482.1	Hylocereus undatus beta-galactosidase (bGal) mRNA, complete cds	-	-	-	-	-	55.8	4.3e-301	sp|Q9SCV3|BGAL9_ARATH	Beta-galactosidase 9 OS=Arabidopsis thaliana GN=BGAL9 PE=2 SV=1	PF02449:Beta-galactosidase;PF02140:Galactose binding lectin domain	GO:0005975	carbohydrate metabolic process	GO:0009341	beta-galactosidase complex	GO:0004565//GO:0030246	beta-galactosidase activity//carbohydrate binding	At2g32810	Beta-galactosidase
transcript_HQ_TX_pn_transcript55922/f4p0/1733	1733	88.9	3e-173	XP_001785923.1	predicted protein [Physcomitrella patens]	79.259	2.07e-179	XM_001785871.1	Physcomitrella patens subsp. patens predicted protein (PHYPADRAFT_102204) mRNA, complete cds	-	-	-	-	-	56.2	2.2e-105	sp|Q6NLB1|FB118_ARATH	F-box protein At2g26850 OS=Arabidopsis thaliana GN=At2g26850 PE=2 SV=1	PF15966:F-box;PF12937:F-box-like;PF00646:F-box domain	--	--	--	--	GO:0005515	protein binding	--	--
transcript_HQ_TX_pn_transcript41910/f3p0/2070	2070	40.4	8.7e-71	XP_001774247.1	predicted protein [Physcomitrella patens]	--	--	--	--	-	-	-	-	-	35.5	1.5e-52	sp|Q766C2|NEP2_NEPGR	Aspartic proteinase nepenthesin-2 OS=Nepenthes gracilis GN=nep2 PE=1 SV=1	--	--	--	--	--	--	--	At3g25700	Aspartyl protease
transcript_HQ_TX_pn_transcript62329/f2p0/1535	1534	32.7	1.4e-12	XP_001754102.1	predicted protein [Physcomitrella patens]	--	--	--	--	-	-	-	-	-	--	--	--	--	--	--	--	--	--	--	--	--	--
transcript_HQ_TX_pn_transcript24333/f14p0/2522	2522	62.7	5.2e-126	XP_001751534.1	predicted protein [Physcomitrella patens]	--	--	--	--	-	-	-	-	-	--	--	--	--	--	--	--	--	--	--	--	--	--
transcript_HQ_TX_pn_transcript56521/f2p0/1701	1701	67.1	5.8e-57	XP_001767873.1	predicted protein [Physcomitrella patens]	--	--	--	--	-	-	-	-	-	--	--	--	--	--	--	--	--	--	--	--	--	--
transcript_HQ_TX_pn_transcript12321/f13p0/3036	3036	41.2	2.5e-50	OAE26376.1	hypothetical protein AXG93_4324s1440 [Marchantia polymorpha subsp. polymorpha]	--	--	--	--	-	-	-	-	-	24.5	5.1e-09	sp|Q9XZC0|LCTA_LATTR	Alpha-latrocrustotoxin-Lt1a (Fragment) OS=Latrodectus tredecimguttatus PE=2 SV=2	PF00023:Ankyrin repeat;PF13606:Ankyrin repeat	--	--	--	--	GO:0005515	protein binding	YGR233c_2	FOG: Ankyrin repeat
transcript_HQ_TX_pn_transcript6141/f2p0/3578	3578	53.8	1.1e-116	XP_001764135.1	predicted protein [Physcomitrella patens]	--	--	--	--	-	-	-	-	-	27.8	1.9e-10	sp|Q9FHS6|FK119_ARATH	F-box/kelch-repeat protein At5g43190 OS=Arabidopsis thaliana GN=At5g43190 PE=2 SV=1	PF12937:F-box-like;PF00646:F-box domain	--	--	--	--	GO:0005515	protein binding	--	--
transcript_HQ_TX_pn_transcript44227/f4p0/2014	2014	84.3	2.5e-91	XP_001777273.1	predicted protein [Physcomitrella patens]	83.735	3.35e-128	XM_001777221.1	Physcomitrella patens subsp. patens predicted protein (PHYPADRAFT_221736) mRNA, partial cds	-	-	-	-	-	56.7	5e-77	sp|F4IPE3|IDD15_ARATH	Protein SHOOT GRAVITROPISM 5 OS=Arabidopsis thaliana GN=SGR5 PE=1 SV=1	PF13912:C2H2-type zinc finger;PF00096:Zinc finger, C2H2 type	--	--	--	--	GO:0046872	metal ion binding	At2g01940	FOG: Zn-finger
transcript_HQ_TX_pn_transcript66374/f2p0/1344	1344	87.4	2.2e-128	XP_001779229.1	predicted protein [Physcomitrella patens]	83.499	0	XM_001779177.1	Physcomitrella patens subsp. patens predicted protein (PHYPADRAFT_223248) mRNA, complete cds	K08914	LHCB3	light-harvesting complex II chlorophyll a/b binding protein 3	-	ko00196; Metabolism; Energy metabolism; Photosynthesis - antenna proteins	77.2	3.3e-109	sp|P27489|CB23_SOLLC	Chlorophyll a-b binding protein 13, chloroplastic OS=Solanum lycopersicum GN=CAB13 PE=1 SV=1	--	--	--	--	--	--	--	--	--
transcript_HQ_TX_pn_transcript69410/f3p0/1233	1233	--	--	--	--	--	--	--	--	--	--	--	--	--	28.5	5.3e-13	sp|Q52087|HADL_PSEPU	(S)-2-haloacid dehalogenase OS=Pseudomonas putida GN=hadL PE=1 SV=1	--	--	--	--	--	--	--	--	--
transcript_HQ_TX_pn_transcript66698/f3p0/1370	1370	43.6	9.9e-23	XP_001776043.1	predicted protein [Physcomitrella patens]	--	--	--	--	-	-	-	-	-	42	6.1e-18	sp|P82859|LECA_CASCR	Agglutinin OS=Castanea crenata PE=1 SV=1	PF06140:Interferon-induced 6-16 family	--	--	GO:0016021	integral component of membrane	--	--	--	--
transcript_HQ_TX_pn_transcript15047/f3p0/2922	2922	49.4	1.9e-119	XP_001751577.1	predicted protein [Physcomitrella patens]	--	--	--	--	-	-	-	-	-	--	--	--	--	--	--	--	--	--	--	--	--	--
transcript_HQ_TX_pn_transcript49385/f5p0/1836	1836	73.9	5.9e-164	XP_001775360.1	predicted protein [Physcomitrella patens]	74.046	7.71e-15	XM_016621641.1	PREDICTED: Nicotiana tabacum protein LOW PSII ACCUMULATION 3, chloroplastic-like (LOC107798621), mRNA	-	-	-	-	-	60.7	1.2e-114	sp|Q8H0W0|LPA3_ARATH	Protein LOW PSII ACCUMULATION 3, chloroplastic OS=Arabidopsis thaliana GN=LPA3 PE=1 SV=1	--	--	--	--	--	--	--	--	--
transcript_HQ_TX_pn_transcript52040/f2p0/1829	1830	98.3	1.7e-182	XP_001758131.1	predicted protein [Physcomitrella patens]	86.204	0	XM_001758079.1	Physcomitrella patens subsp. patens predicted protein (PHYPADRAFT_206051) mRNA, complete cds	K15498	PPP6C	serine/threonine-protein phosphatase 6 catalytic subunit	3.1.3.16	-	91.1	2.7e-170	sp|Q8LSN3|FYPP_PEA	Phytochrome-associated serine/threonine-protein phosphatase OS=Pisum sativum GN=FYPP PE=1 SV=1	PF00149:Calcineurin-like phosphoesterase	--	--	--	--	GO:0016787	hydrolase activity	At3g19980	Serine/threonine specific protein phosphatase involved in cell cycle control, PP2A-related
transcript_HQ_TX_pn_transcript16389/f2p0/2865	2865	81.8	1.8e-106	XP_001770015.1	predicted protein [Physcomitrella patens]	84.739	6.79e-62	XM_001769963.1	Physcomitrella patens subsp. patens predicted protein (PHYPADRAFT_188494) mRNA, complete cds	-	-	-	-	-	--	--	--	--	--	--	--	--	--	--	--	--	--
transcript_HQ_TX_pn_transcript26077/f2p0/2496	2496	74.5	1.9e-160	XP_001768181.1	predicted protein [Physcomitrella patens]	--	--	--	--	K13946	AUX1, LAX	auxin influx carrier (AUX1 LAX family)	-	ko04075; Environmental Information Processing; Signal transduction; Plant hormone signal transduction	49.2	9.8e-99	sp|Q9FEL6|LAX3_MEDTR	Auxin transporter-like protein 3 OS=Medicago truncatula GN=LAX3 PE=2 SV=1	--	--	--	--	--	--	--	At1g77690	Amino acid transporters
transcript_HQ_TX_pn_transcript12408/f5p0/3050	3050	62.7	8.8e-221	XP_001776621.1	predicted protein [Physcomitrella patens]	76.462	0	AB979874.1	Physcomitrella patens PpPPR_45 mRNA for pentatricopeptide repeat protein, complete cds	-	-	-	-	-	43.1	1.9e-152	sp|Q7Y211|PP285_ARATH	Pentatricopeptide repeat-containing protein At3g57430, chloroplastic OS=Arabidopsis thaliana GN=PCMP-H81 PE=2 SV=2	PF14432:DYW family of nucleic acid deaminases	--	--	--	--	GO:0008270	zinc ion binding	At3g57430	FOG: PPR repeat
transcript_HQ_TX_pn_transcript58075/f4p0/1653	1653	64.4	4.1e-116	XP_001776333.1	predicted protein [Physcomitrella patens]	--	--	--	--	-	-	-	-	-	--	--	--	--	--	--	--	--	--	--	--	--	--
transcript_HQ_TX_pn_transcript44385/f12p0/1937	1937	77.5	8.9e-219	XP_001766299.1	predicted protein [Physcomitrella patens]	--	--	--	--	-	-	-	-	-	35.9	1.3e-74	sp|Q42569|C90A1_ARATH	Cytochrome P450 90A1 OS=Arabidopsis thaliana GN=CYP90A1 PE=2 SV=1	PF00067:Cytochrome P450	GO:0055114	oxidation-reduction process	--	--	GO:0020037//GO:0016705//GO:0005506	heme binding//oxidoreductase activity, acting on paired donors, with incorporation or reduction of molecular oxygen//iron ion binding	At5g05690	Cytochrome P450 CYP4/CYP19/CYP26 subfamilies
transcript_HQ_TX_pn_transcript38847/f3p0/2093	2092	59.8	2.7e-51	XP_001767938.1	predicted protein [Physcomitrella patens]	85.294	2.36e-40	NM_001154186.2	Zea mays uncharacterized LOC100281267 (umc2531), mRNA	-	-	-	-	-	65.9	3e-24	sp|Q9SND4|HEC2_ARATH	Transcription factor HEC2 OS=Arabidopsis thaliana GN=HEC2 PE=1 SV=1	PF00010:Helix-loop-helix DNA-binding domain	--	--	--	--	GO:0046983	protein dimerization activity	--	--
transcript_HQ_TX_pn_transcript13480/f4p0/3002	3002	36.2	6.3e-38	XP_002983016.1	hypothetical protein SELMODRAFT_117674, partial [Selaginella moellendorffii]	--	--	--	--	-	-	-	-	-	34.2	3.6e-31	sp|P25848|PHY1_CERPU	Light-sensor Protein kinase OS=Ceratodon purpureus GN=PHY1 PE=3 SV=3	PF07714:Protein tyrosine kinase;PF06293:Lipopolysaccharide kinase (Kdo/WaaP) family;PF00069:Protein kinase domain;PF01926:50S ribosome-binding GTPase	GO:0006468	protein phosphorylation	GO:0016020	membrane	GO:0005525//GO:0005524//GO:0004672//GO:0016773	GTP binding//ATP binding//protein kinase activity//phosphotransferase activity, alcohol group as acceptor	Hs21735566	Tyrosine kinase specific for activated (GTP-bound) p21cdc42Hs
transcript_HQ_TX_pn_transcript22516/f2p0/2577	2577	79.6	0	XP_001764075.1	predicted protein [Physcomitrella patens]	81.978	0	XM_001764023.1	Physcomitrella patens subsp. patens predicted protein (PHYPADRAFT_106197) mRNA, complete cds	K20289	COG2	conserved oligomeric Golgi complex subunit 2	-	-	27.8	1.4e-71	sp|Q14746|COG2_HUMAN	Conserved oligomeric Golgi complex subunit 2 OS=Homo sapiens GN=COG2 PE=1 SV=1	PF10778:Halocarboxylic acid dehydrogenase DehI;PF15088:NADH dehydrogenase [ubiquinone] 1 subunit C1, mitochondrial	--	--	GO:0005747//GO:0005739	mitochondrial respiratory chain complex I//mitochondrion	GO:0019120	hydrolase activity, acting on acid halide bonds, in C-halide compounds	At4g24840	Low density lipoprotein receptor
transcript_HQ_TX_pn_transcript40077/f2p0/2057	2057	64.7	5.6e-163	AGY49230.1	CBL-interacting protein kinase 7 [Physcomitrella patens]	81.566	0	KF310900.1	Physcomitrella patens strain Gransden 2004 CBL-interacting protein kinase 7 mRNA, complete cds	-	-	-	-	-	65	1.5e-129	sp|Q69Q47|CIPKO_ORYSJ	CBL-interacting protein kinase 24 OS=Oryza sativa subsp. japonica GN=CIPK24 PE=1 SV=1	PF06293:Lipopolysaccharide kinase (Kdo/WaaP) family;PF07714:Protein tyrosine kinase;PF03822:NAF domain;PF00069:Protein kinase domain	GO:0006468//GO:0007165	protein phosphorylation//signal transduction	GO:0016020	membrane	GO:0005524//GO:0016773//GO:0004672	ATP binding//phosphotransferase activity, alcohol group as acceptor//protein kinase activity	At4g24400	Serine/threonine protein kinase
transcript_HQ_TX_pn_transcript48834/f3p0/1902	1902	60.3	4e-171	XP_001755044.1	predicted protein [Physcomitrella patens]	--	--	--	--	-	-	-	-	-	50.9	2.3e-132	sp|Q50EK1|C16B1_PICSI	Cytochrome P450 716B1 OS=Picea sitchensis GN=CYP716B1 PE=2 SV=1	PF05371:Phage major coat protein, Gp8;PF00067:Cytochrome P450	GO:0055114	oxidation-reduction process	GO:0019028	viral capsid	GO:0005506//GO:0016705//GO:0020037	iron ion binding//oxidoreductase activity, acting on paired donors, with incorporation or reduction of molecular oxygen//heme binding	At5g36110	Cytochrome P450 CYP4/CYP19/CYP26 subfamilies
transcript_HQ_TX_pn_transcript53074/f2p0/1800	1799	81	1.4e-221	XP_001755207.1	predicted protein [Physcomitrella patens]	83.47	0	XM_001755155.1	Physcomitrella patens subsp. patens predicted protein (PHYPADRAFT_116537) mRNA, complete cds	K01369	LGMN	legumain	3.4.22.34	ko04142; Cellular Processes; Transport and catabolism; Lysosome | ko04612; Organismal Systems; Immune system; Antigen processing and presentation	60.9	1.5e-162	sp|O24325|VPE1_PHAVU	Vacuolar-processing enzyme OS=Phaseolus vulgaris PE=1 SV=1	PF01650:Peptidase C13 family	GO:0006508	proteolysis	--	--	GO:0008233	peptidase activity	At4g32940	Asparaginyl peptidases
transcript_HQ_TX_pn_transcript22096/f31p0/2575	2575	72.7	6.3e-188	XP_001766925.1	predicted protein [Physcomitrella patens]	74.242	7.04e-141	XM_001766000.1	Physcomitrella patens subsp. patens predicted protein (PHYPADRAFT_14114) mRNA, partial cds	-	-	-	-	-	40.9	3.3e-89	sp|Q9C8K7|FBK21_ARATH	F-box/kelch-repeat protein At1g51550 OS=Arabidopsis thaliana GN=At1g51550 PE=2 SV=1	PF01344:Kelch motif;PF03089:Recombination activating protein 2;PF00646:F-box domain;PF12937:F-box-like;PF07646:Kelch motif	GO:0006310	DNA recombination	GO:0005634	nucleus	GO:0003677//GO:0005515	DNA binding//protein binding	At1g51550	Kelch repeat-containing proteins
transcript_HQ_TX_pn_transcript66998/f3p0/1366	1366	84.6	8.1e-134	XP_001762757.1	predicted protein [Physcomitrella patens]	76.667	5.74e-10	AC231502.2	Oryza minuta clone OM__Ba0161M03, complete sequence	K17991	PXG	peroxygenase	1.11.2.3	ko00073; Metabolism; Lipid metabolism; Cutin, suberine and wax biosynthesis	44.3	3.2e-59	sp|O22788|PXG3_ARATH	Probable peroxygenase 3 OS=Arabidopsis thaliana GN=PXG3 PE=1 SV=1	PF13405:EF-hand domain	--	--	--	--	GO:0005509	calcium ion binding	--	--
transcript_HQ_TX_pn_transcript43995/f2p0/1933	1933	72.9	3.2e-112	XP_001772911.1	predicted protein [Physcomitrella patens]	89.637	1.64e-61	XM_001772859.1	Physcomitrella patens subsp. patens predicted protein (PHYPADRAFT_167738) mRNA, complete cds	K10606	FANCL, PHF9	E3 ubiquitin-protein ligase FANCL	2.3.2.27	ko04120; Genetic Information Processing; Folding, sorting and degradation; Ubiquitin mediated proteolysis | ko03460; Genetic Information Processing; Replication and repair; Fanconi anemia pathway	35.4	4.1e-44	sp|Q9CR14|FANCL_MOUSE	E3 ubiquitin-protein ligase FANCL OS=Mus musculus GN=Fancl PE=1 SV=1	PF13639:Ring finger domain;PF12861:Anaphase-promoting complex subunit 11 RING-H2 finger;PF12678:RING-H2 zinc finger domain;PF12906:RING-variant domain;PF00628:PHD-finger	--	--	GO:0005680	anaphase-promoting complex	GO:0008270//GO:0004842//GO:0005515	zinc ion binding//ubiquitin-protein transferase activity//protein binding	Hs8922360	Predicted E3 ubiquitin ligase
transcript_HQ_TX_pn_transcript66536/f9p0/1371	1371	54.2	3.6e-81	XP_001781580.1	predicted protein [Physcomitrella patens]	92.453	1.6e-10	XM_004965510.1	PREDICTED: Setaria italica peroxidase P7-like (LOC101783109), mRNA	K00430	E1.11.1.7	peroxidase	1.11.1.7	ko00940; Metabolism; Biosynthesis of other secondary metabolites; Phenylpropanoid biosynthesis	45.6	9.2e-67	sp|P17180|PER3_ARMRU	Peroxidase C3 OS=Armoracia rusticana GN=PRXC3 PE=3 SV=1	PF00141:Peroxidase	GO:0006979//GO:0055114	response to oxidative stress//oxidation-reduction process	--	--	GO:0004601//GO:0020037	peroxidase activity//heme binding	--	--
transcript_HQ_TX_pn_transcript68736/f9p0/1260	1260	84.2	3.7e-133	XP_001762757.1	predicted protein [Physcomitrella patens]	--	--	--	--	K17991	PXG	peroxygenase	1.11.2.3	ko00073; Metabolism; Lipid metabolism; Cutin, suberine and wax biosynthesis	50	3.8e-59	sp|G1JSL4|PXG1_AVESA	Peroxygenase 1 OS=Avena sativa PE=1 SV=1	PF13405:EF-hand domain	--	--	--	--	GO:0005509	calcium ion binding	--	--
transcript_HQ_TX_pn_transcript73893/f2p0/934	934	--	--	--	--	--	--	--	--	--	--	--	--	--	--	--	--	--	--	--	--	--	--	--	--	--	--
transcript_HQ_TX_pn_transcript52950/f5p0/1796	1796	73.3	4.6e-185	XP_001773192.1	predicted protein [Physcomitrella patens]	78.799	0	XM_001773140.1	Physcomitrella patens subsp. patens predicted protein (PHYPADRAFT_139731) mRNA, complete cds	K14553	UTP18	U3 small nucleolar RNA-associated protein 18	-	ko03008; Genetic Information Processing; Translation; Ribosome biogenesis in eukaryotes	47.2	1e-113	sp|Q9FMU5|UTP18_ARATH	U3 small nucleolar RNA-associated protein 18 homolog OS=Arabidopsis thaliana GN=At5g14050 PE=1 SV=1	PF07569:TUP1-like enhancer of split;PF01981:Peptidyl-tRNA hydrolase PTH2;PF00400:WD domain, G-beta repeat	GO:0006355	regulation of transcription, DNA-templated	GO:0005634	nucleus	GO:0005515//GO:0004045	protein binding//aminoacyl-tRNA hydrolase activity	At5g14050	WD40 repeat protein
transcript_HQ_TX_pn_transcript7581/f3p0/3434	3434	54.6	1.5e-181	BAV53284.1	non-phototropic hypocotyl 3-like protein [Marchantia polymorpha]	--	--	--	--	-	-	-	-	-	43.9	3.4e-134	sp|Q9C9V6|Y1790_ARATH	BTB/POZ domain-containing protein At1g67900 OS=Arabidopsis thaliana GN=At1g67900 PE=1 SV=1	PF00651:BTB/POZ domain	--	--	--	--	GO:0005515	protein binding	--	--
transcript_HQ_TX_pn_transcript52003/f2p0/1827	1827	64.4	2.6e-127	XP_001752583.1	predicted protein [Physcomitrella patens]	79.893	0	XM_001752531.1	Physcomitrella patens subsp. patens predicted protein (PHYPADRAFT_174203) mRNA, complete cds	K12501	HST	homogentisate solanesyltransferase	2.5.1.117	ko00130; Metabolism; Metabolism of cofactors and vitamins; Ubiquinone and other terpenoid-quinone biosynthesis	--	--	--	--	PF03145:Seven in absentia protein family;PF02176:TRAF-type zinc finger	GO:0007275//GO:0006511	multicellular organism development//ubiquitin-dependent protein catabolic process	GO:0005634	nucleus	GO:0008270	zinc ion binding	--	--
transcript_HQ_TX_pn_transcript63251/f7p0/1426	1426	66.4	1.2e-100	XP_001771709.1	predicted protein [Physcomitrella patens]	74.378	1.17e-81	XM_001771657.1	Physcomitrella patens subsp. patens predicted protein (PHYPADRAFT_167245) mRNA, complete cds	-	-	-	-	-	--	--	--	--	--	--	--	--	--	--	--	--	--
transcript_HQ_TX_pn_transcript72827/f3p0/1016	1016	43.7	5.3e-29	XP_001763251.1	predicted protein [Physcomitrella patens]	--	--	--	--	-	-	-	-	-	--	--	--	--	PF00527:E7 protein, Early protein;PF00403:Heavy-metal-associated domain	GO:0030001//GO:0006355	metal ion transport//regulation of transcription, DNA-templated	--	--	GO:0046872//GO:0003677//GO:0003700	metal ion binding//DNA binding//transcription factor activity, sequence-specific DNA binding	--	--
transcript_HQ_TX_pn_transcript29324/f4p0/2272	2272	49.1	1.1e-66	XP_001768875.1	predicted protein [Physcomitrella patens]	--	--	--	--	-	-	-	-	-	--	--	--	--	PF09377:SBDS protein C-terminal domain;PF00847:AP2 domain	GO:0006355//GO:0042254	regulation of transcription, DNA-templated//ribosome biogenesis	--	--	GO:0003700	transcription factor activity, sequence-specific DNA binding	--	--
transcript_HQ_TX_pn_transcript13246/f3p0/3019	3018	64.3	2.9e-184	XP_001776621.1	predicted protein [Physcomitrella patens]	75.599	1.01e-179	AB979874.1	Physcomitrella patens PpPPR_45 mRNA for pentatricopeptide repeat protein, complete cds	K17710	PTCD1	pentatricopeptide repeat domain-containing protein 1	-	-	35.3	6.7e-94	sp|P93005|PP181_ARATH	Pentatricopeptide repeat-containing protein At2g33680 OS=Arabidopsis thaliana GN=PCMP-E19 PE=3 SV=1	PF17049:ATPase expression protein 1;PF14432:DYW family of nucleic acid deaminases	GO:0006417	regulation of translation	--	--	GO:0008270//GO:0045182	zinc ion binding//translation regulator activity	At2g33680	FOG: PPR repeat
transcript_HQ_TX_pn_transcript70806/f8p0/1099	1099	91.8	2.1e-60	XP_001777844.1	predicted protein [Physcomitrella patens]	85.678	1.43e-109	XM_001761047.1	Physcomitrella patens subsp. patens predicted protein (PHYPADRAFT_208394) mRNA, complete cds	-	-	-	-	-	59.3	2.3e-36	sp|P59234|YIPL_SOLTU	Protein yippee-like OS=Solanum tuberosum PE=2 SV=1	--	--	--	--	--	--	--	At2g40110	Predicted Yippee-type zinc-binding protein
transcript_HQ_TX_pn_transcript66735/f4p0/1352	1352	64.3	4.9e-75	XP_001767408.1	predicted protein [Physcomitrella patens]	--	--	--	--	-	-	-	-	-	44.3	3.1e-06	sp|Q495M9|USH1G_HUMAN	Usher syndrome type-1G protein OS=Homo sapiens GN=USH1G PE=1 SV=1	PF07647:SAM domain (Sterile alpha motif);PF00536:SAM domain (Sterile alpha motif)	--	--	--	--	GO:0005515	protein binding	At3g07170	RNA-binding protein Bicaudal-C
transcript_HQ_TX_pn_transcript33951/f4p0/2256	2256	82.3	3.2e-159	XP_001754186.1	predicted protein [Physcomitrella patens]	--	--	--	--	K15688	MUL1	E3 ubiquitin-protein ligase MUL1	2.3.2.27	-	60.1	3.2e-117	sp|Q8L7N4|SP1_ARATH	E3 ubiquitin-protein ligase SP1 OS=Arabidopsis thaliana GN=SP1 PE=1 SV=1	PF14634:zinc-RING finger domain;PF12483:E3 Ubiquitin ligase	GO:0006996//GO:0016567	organelle organization//protein ubiquitination	--	--	GO:0008270//GO:0005515//GO:0004842	zinc ion binding//protein binding//ubiquitin-protein transferase activity	At1g59560	Predicted E3 ubiquitin ligase
transcript_HQ_TX_pn_transcript13692/f2p0/2996	2994	79	9.2e-114	XP_001757346.1	predicted protein [Physcomitrella patens]	78.236	6.29e-147	XM_001757294.1	Physcomitrella patens subsp. patens predicted protein (PHYPADRAFT_70176) mRNA, complete cds	-	-	-	-	-	63.9	4.1e-43	sp|Q94A57|PHL2_ARATH	Protein PHR1-LIKE 2 OS=Arabidopsis thaliana GN=PHL2 PE=1 SV=1	--	--	--	--	--	--	--	--	--
transcript_HQ_TX_pn_transcript33301/f2p0/2277	2277	72	4.7e-118	XP_001770804.1	predicted protein [Physcomitrella patens]	--	--	--	--	-	-	-	-	-	32.9	1.6e-15	sp|G4LTX4|DSP4_CASSA	Phosphoglucan phosphatase DSP4, amyloplastic OS=Castanea sativa GN=DSP4 PE=1 SV=1	PF00782:Dual specificity phosphatase, catalytic domain	GO:0006470	protein dephosphorylation	--	--	GO:0008138	protein tyrosine/serine/threonine phosphatase activity	At3g10940	Dual specificity phosphatase
transcript_HQ_TX_pn_transcript47175/f7p0/1932	1932	65.5	1e-153	XP_001775095.1	predicted protein [Physcomitrella patens]	80.934	0	XM_001775043.1	Physcomitrella patens subsp. patens predicted protein (PHYPADRAFT_89684) mRNA, complete cds	K14782	AATF, BFR2	protein AATF/BFR2	-	-	25.9	3e-15	sp|Q6BXX1|BFR2_DEBHA	Protein BFR2 OS=Debaryomyces hansenii (strain ATCC 36239 / CBS 767 / JCM 1990 / NBRC 0083 / IGC 2968) GN=BFR2 PE=3 SV=2	PF08164:Apoptosis-antagonizing transcription factor, C-terminal	--	--	GO:0005634	nucleus	--	--	At5g61330	Apoptosis antagonizing transcription factor/protein transport protein
transcript_HQ_TX_pn_transcript11122/f5p0/3153	3153	68.9	0	XP_001766322.1	predicted protein [Physcomitrella patens]	81.755	0	XM_001766270.1	Physcomitrella patens subsp. patens predicted protein (PHYPADRAFT_165131) mRNA, complete cds	-	-	-	-	-	21.5	2.9e-07	sp|Q9SMY8|FBL15_ARATH	F-box/LRR-repeat protein 15 OS=Arabidopsis thaliana GN=FBL15 PE=2 SV=2	PF13516:Leucine Rich repeat;PF12937:F-box-like;PF00646:F-box domain	--	--	--	--	GO:0005515	protein binding	At4g33210	Leucine rich repeat proteins, some proteins contain F-box
transcript_HQ_TX_pn_transcript19623/f2p0/2730	2731	78	3.4e-248	XP_001767768.1	cpk1 calcium-dependent protein kinase [Physcomitrella patens]	80.817	0	XM_001768928.1	Physcomitrella patens subsp. patens predicted protein (PHYPADRAFT_214963) mRNA, complete cds	K13412	CPK	calcium-dependent protein kinase	2.7.11.1	ko04626; Organismal Systems; Environmental adaptation; Plant-pathogen interaction | ko05145; Human Diseases; Infectious diseases: Parasitic; Toxoplasmosis	71.3	7e-199	sp|Q9FMP5|CDPKH_ARATH	Calcium-dependent protein kinase 17 OS=Arabidopsis thaliana GN=CPK17 PE=2 SV=1	PF13499:EF-hand domain pair;PF12763:Cytoskeletal-regulatory complex EF hand;PF00069:Protein kinase domain;PF13202:EF hand;PF10591:Secreted protein acidic and rich in cysteine Ca binding region;PF13833:EF-hand domain pair;PF00036:EF hand;PF13405:EF-hand domain;PF06293:Lipopolysaccharide kinase (Kdo/WaaP) family;PF07714:Protein tyrosine kinase	GO:0007165//GO:0006468	signal transduction//protein phosphorylation	GO:0016020//GO:0005578	membrane//proteinaceous extracellular matrix	GO:0005515//GO:0004672//GO:0005509//GO:0005524//GO:0016773	protein binding//protein kinase activity//calcium ion binding//ATP binding//phosphotransferase activity, alcohol group as acceptor	At5g12180	Ca2+/calmodulin-dependent protein kinase, EF-Hand protein superfamily
transcript_HQ_TX_pn_transcript21099/f3p0/2667	2667	77.7	1.9e-115	XP_001777915.1	predicted protein [Physcomitrella patens]	84.983	0	XM_001777863.1	Physcomitrella patens subsp. patens predicted protein (PHYPADRAFT_145553) mRNA, complete cds	-	-	-	-	-	51.8	1.9e-71	sp|Q9FYG3|PLST2_ARATH	Probable plastidic glucose transporter 2 OS=Arabidopsis thaliana GN=At1g67300 PE=2 SV=1	PF07690:Major Facilitator Superfamily;PF00083:Sugar (and other) transporter	GO:0055085	transmembrane transport	GO:0016021	integral component of membrane	GO:0022857	transmembrane transporter activity	At1g67300	Predicted transporter (major facilitator superfamily)
transcript_HQ_TX_pn_transcript26648/f2p0/2479	2479	86.1	0	XP_001766848.1	predicted protein [Physcomitrella patens]	82.3	0	XM_001766796.1	Physcomitrella patens subsp. patens predicted protein (PHYPADRAFT_58059) mRNA, complete cds	K03147	thiC	phosphomethylpyrimidine synthase	4.1.99.17	ko00730; Metabolism; Metabolism of cofactors and vitamins; Thiamine metabolism	81.3	1.2e-301	sp|O82392|THIC_ARATH	Phosphomethylpyrimidine synthase, chloroplastic OS=Arabidopsis thaliana GN=THIC PE=1 SV=1	PF01964:Radical SAM ThiC family	GO:0009228	thiamine biosynthetic process	--	--	GO:0051536	iron-sulfur cluster binding	--	--
transcript_HQ_TX_pn_transcript55704/f63p0/1645	1646	75.2	7.2e-137	XP_001763449.1	predicted protein [Physcomitrella patens]	--	--	--	--	-	-	-	-	-	--	--	--	--	PF01344:Kelch motif;PF00646:F-box domain;PF12937:F-box-like	--	--	--	--	GO:0005515	protein binding	--	--
transcript_HQ_TX_pn_transcript40368/f2p0/2115	2115	78.1	2e-75	XP_001761045.1	predicted protein [Physcomitrella patens]	82.986	2.66e-144	XM_001776301.1	Physcomitrella patens subsp. patens predicted protein (PHYPADRAFT_220982) mRNA, complete cds	K00942	E2.7.4.8, gmk	guanylate kinase	2.7.4.8	ko00230; Metabolism; Nucleotide metabolism; Purine metabolism	55.9	5.8e-52	sp|Q2QPW1|GMK1_ORYSJ	Guanylate kinase 1 OS=Oryza sativa subsp. japonica GN=GK1 PE=2 SV=2	PF00005:ABC transporter;PF01637:ATPase domain predominantly from Archaea;PF03193:Protein of unknown function, DUF258;PF00910:RNA helicase	--	--	--	--	GO:0005524//GO:0005525//GO:0016887//GO:0003924//GO:0003723//GO:0003724	ATP binding//GTP binding//ATPase activity//GTPase activity//RNA binding//RNA helicase activity	At3g57550	Guanylate kinase
transcript_HQ_TX_pn_transcript40537/f3p0/2101	2101	71.9	2.4e-153	XP_001768569.1	predicted protein [Physcomitrella patens]	80.235	0	XM_001768517.1	Physcomitrella patens subsp. patens predicted protein (PHYPADRAFT_133577) mRNA, complete cds	-	-	-	-	-	--	--	--	--	PF02485:Core-2/I-Branching enzyme	--	--	GO:0016020	membrane	GO:0008375	acetylglucosaminyltransferase activity	--	--
transcript_HQ_TX_pn_transcript66859/f3p0/1319	1319	63.2	8.5e-72	XP_001763694.1	predicted protein [Physcomitrella patens]	79.487	6.04e-129	XM_001763642.1	Physcomitrella patens subsp. patens predicted protein (PHYPADRAFT_163941) mRNA, complete cds	--	--	--	--	--	--	--	--	--	PF15234:Linker for activation of T-cells	GO:0007165	signal transduction	GO:0016020	membrane	--	--	--	--
transcript_HQ_TX_pn_transcript44214/f2p0/2007	2005	55	1.5e-72	XP_001778826.1	predicted protein [Physcomitrella patens]	77.662	3.6e-73	XM_001784162.1	Physcomitrella patens subsp. patens predicted protein (PHYPADRAFT_34976) mRNA, partial cds	K12471	EPN	epsin	-	ko04144; Cellular Processes; Transport and catabolism; Endocytosis	30.8	5.2e-18	sp|P78813|YCTB_SCHPO	ENTH domain-containing protein C794.11c OS=Schizosaccharomyces pombe (strain 972 / ATCC 24843) GN=SPCC794.11c PE=1 SV=2	PF07651:ANTH domain	--	--	--	--	GO:0005543	phospholipid binding	At3g46540	Equilibrative nucleoside transporter protein
transcript_HQ_TX_pn_transcript44954/f3p0/1993	1993	90	2e-149	XP_001751574.1	predicted protein [Physcomitrella patens]	75.704	7.59e-85	XM_009385629.2	PREDICTED: Musa acuminata subsp. malaccensis probable aquaporin PIP1-2 (LOC103971568), mRNA	K09872	PIP	aquaporin PIP	-	-	75.7	1.8e-124	sp|P61837|PIP11_ARATH	Aquaporin PIP1-1 OS=Arabidopsis thaliana GN=PIP1-1 PE=1 SV=1	PF00230:Major intrinsic protein	GO:0006810	transport	GO:0016020	membrane	GO:0005215	transporter activity	At3g61430	Aquaporin (major intrinsic protein family)
transcript_HQ_TX_pn_transcript58152/f5p0/1656	1656	69.4	9.1e-55	XP_001783122.1	predicted protein [Physcomitrella patens]	--	--	--	--	-	-	-	-	-	--	--	--	--	PF06423:GWT1	GO:0006506	GPI anchor biosynthetic process	GO:0016021	integral component of membrane	GO:0016746	transferase activity, transferring acyl groups	--	--
transcript_LQ_TX_pn_transcript12835/f2p0/3040	3037	74.4	2.6e-116	XP_001752133.1	predicted protein [Physcomitrella patens]	--	--	--	--	-	-	-	-	-	32.9	7.3e-40	sp|Q8LFX7|BDG1_ARATH	Probable lysophospholipase BODYGUARD 1 OS=Arabidopsis thaliana GN=BDG1 PE=2 SV=1	PF00326:Prolyl oligopeptidase family;PF04083:Partial alpha/beta-hydrolase lipase region;PF06821:Serine hydrolase;PF07819:PGAP1-like protein;PF07859:alpha/beta hydrolase fold;PF02230:Phospholipase/Carboxylesterase;PF01764:Lipase (class 3);PF00975:Thioesterase domain	GO:0006629//GO:0006508//GO:0009058//GO:0008152	lipid metabolic process//proteolysis//biosynthetic process//metabolic process	--	--	GO:0016787//GO:0008236//GO:0016788	hydrolase activity//serine-type peptidase activity//hydrolase activity, acting on ester bonds	At1g64670	Predicted hydrolase/acyltransferase (alpha/beta hydrolase superfamily)
transcript_HQ_TX_pn_transcript71122/f23p0/1112	1112	84.8	4.8e-92	XP_001753653.1	early light-induced protein 3 [Physcomitrella patens]	87.276	1.35e-159	AY034890.1	Tortula ruralis early light-inducible protein ELIPA mRNA, complete cds	-	-	-	-	-	48.8	6.2e-21	sp|Q01931|DS22_CRAPL	Desiccation stress protein DSP-22, chloroplastic OS=Craterostigma plantagineum GN=DSP-22 PE=2 SV=1	--	--	--	--	--	--	--	--	--
transcript_HQ_TX_pn_transcript50538/f2p0/1857	1857	79.7	1.4e-120	XP_001775992.1	predicted protein [Physcomitrella patens]	83.676	0	XM_001775940.1	Physcomitrella patens subsp. patens predicted protein (PHYPADRAFT_143194) mRNA, complete cds	K01366	CTSH	cathepsin H	3.4.22.16	ko04142; Cellular Processes; Transport and catabolism; Lysosome | ko04210; Cellular Processes; Cell growth and death; Apoptosis	56.5	5.3e-73	sp|Q8RWQ9|ALEUL_ARATH	Thiol protease aleurain-like OS=Arabidopsis thaliana GN=At3g45310 PE=2 SV=1	PF00112:Papain family cysteine protease	GO:0006508	proteolysis	--	--	GO:0008234	cysteine-type peptidase activity	At3g45310	Cysteine proteinase Cathepsin L
transcript_HQ_TX_pn_transcript58461/f3p0/1648	1648	47.6	9.6e-89	XP_001774096.1	predicted protein [Physcomitrella patens]	--	--	--	--	-	-	-	-	-	27.3	4e-32	sp|Q9FFN2|GLYT3_ARATH	Probable glycosyltransferase At5g03795 OS=Arabidopsis thaliana GN=At5g03795 PE=3 SV=2	--	--	--	--	--	--	--	At4g38040	Acetylglucosaminyltransferase EXT1/exostosin 1
transcript_HQ_TX_pn_transcript50453/f2p0/1869	1874	34.2	1.3e-28	XP_003631372.1	PREDICTED: gibberellin 20 oxidase 1 [Vitis vinifera]	--	--	--	--	-	-	-	-	-	30.2	4.7e-21	sp|Q39110|GAOX1_ARATH	Gibberellin 20 oxidase 1 OS=Arabidopsis thaliana GN=GA20OX1 PE=2 SV=2	PF03171:2OG-Fe(II) oxygenase superfamily	GO:0055114	oxidation-reduction process	--	--	GO:0016491	oxidoreductase activity	At4g25420	Iron/ascorbate family oxidoreductases
transcript_HQ_TX_pn_transcript12336/f3p0/3067	3067	76	0	XP_001765509.1	predicted protein [Physcomitrella patens]	83.08	0	XM_001760788.1	Physcomitrella patens subsp. patens predicted protein (PHYPADRAFT_208238) mRNA, complete cds	-	-	-	-	-	43.8	7.7e-146	sp|Q93ZQ5|SPXM3_ARATH	SPX domain-containing membrane protein At4g22990 OS=Arabidopsis thaliana GN=At4g22990 PE=2 SV=2	PF00083:Sugar (and other) transporter;PF03137:Organic Anion Transporter Polypeptide (OATP) family;PF07690:Major Facilitator Superfamily	GO:0006810//GO:0055085	transport//transmembrane transport	GO:0016021//GO:0016020	integral component of membrane//membrane	GO:0005215//GO:0022857	transporter activity//transmembrane transporter activity	At4g11810_2	Predicted transporter/transmembrane protein
transcript_HQ_TX_pn_transcript16337/f2p0/2861	2861	68.1	2.1e-216	XP_001760648.1	predicted protein [Physcomitrella patens]	--	--	--	--	-	-	-	-	-	--	--	--	--	PF07690:Major Facilitator Superfamily;PF08019:Domain of unknown function (DUF1705)	GO:0055085	transmembrane transport	GO:0016021	integral component of membrane	--	--	--	--
transcript_HQ_TX_pn_transcript58283/f2p0/1658	1658	74.7	1.7e-125	XP_001766633.1	predicted protein [Physcomitrella patens]	--	--	--	--	K14379	ACP5	tartrate-resistant acid phosphatase type 5	3.1.3.2	ko00740; Metabolism; Metabolism of cofactors and vitamins; Riboflavin metabolism | ko04142; Cellular Processes; Transport and catabolism; Lysosome | ko04380; Organismal Systems; Development; Osteoclast differentiation | ko05323; Human Diseases; Immune diseases; Rheumatoid arthritis	45.7	8e-81	sp|Q8H129|PPA3_ARATH	Purple acid phosphatase 3 OS=Arabidopsis thaliana GN=PAP3 PE=2 SV=1	PF00149:Calcineurin-like phosphoesterase	--	--	--	--	GO:0016787	hydrolase activity	At1g14700	Purple (tartrate-resistant) acid phosphatase
transcript_HQ_TX_pn_transcript33263/f10p0/2208	2208	85.7	7.7e-259	XP_001757568.1	predicted protein [Physcomitrella patens]	79.153	0	XM_001758746.1	Physcomitrella patens subsp. patens predicted protein (PHYPADRAFT_161624) mRNA, complete cds	K15397	KCS	3-ketoacyl-CoA synthase	2.3.1.199	ko00062; Metabolism; Lipid metabolism; Fatty acid elongation	71.6	2.3e-216	sp|Q9LN49|KCS4_ARATH	3-ketoacyl-CoA synthase 4 OS=Arabidopsis thaliana GN=KCS4 PE=2 SV=1	PF08392:FAE1/Type III polyketide synthase-like protein;PF08545:3-Oxoacyl-[acyl-carrier-protein (ACP)] synthase III;PF03788:LrgA family	GO:0006633	fatty acid biosynthetic process	GO:0016021//GO:0016020	integral component of membrane//membrane	GO:0004315//GO:0016747	3-oxoacyl-[acyl-carrier-protein] synthase activity//transferase activity, transferring acyl groups other than amino-acyl groups	--	--
transcript_HQ_TX_pn_transcript48534/f37p0/1865	1865	72.5	4.9e-182	XP_001752686.1	predicted protein [Physcomitrella patens]	76.401	9.78e-39	XM_002443081.1	Sorghum bicolor hypothetical protein, mRNA	-	-	-	-	-	59.7	5.9e-141	sp|Q9LRB5|LHT2_ARATH	Lysine histidine transporter 2 OS=Arabidopsis thaliana GN=LHT2 PE=1 SV=1	--	--	--	--	--	--	--	At5g40780	Amino acid transporters
transcript_HQ_TX_pn_transcript48451/f24p0/1885	1886	88.7	7.6e-215	XP_001776830.1	predicted protein [Physcomitrella patens]	83.552	0	XM_001767094.1	Physcomitrella patens subsp. patens predicted protein (PHYPADRAFT_213493) mRNA, complete cds	K08232	E1.6.5.4	monodehydroascorbate reductase (NADH)	1.6.5.4	ko00053; Metabolism; Carbohydrate metabolism; Ascorbate and aldarate metabolism	65.5	4.9e-159	sp|Q42711|MDARS_CUCSA	Monodehydroascorbate reductase, seedling isozyme OS=Cucumis sativus PE=2 SV=1	PF00070:Pyridine nucleotide-disulphide oxidoreductase;PF01266:FAD dependent oxidoreductase;PF13241:Putative NAD(P)-binding;PF07992:Pyridine nucleotide-disulphide oxidoreductase	GO:0006779//GO:0019354//GO:0055114	porphyrin-containing compound biosynthetic process//siroheme biosynthetic process//oxidation-reduction process	--	--	GO:0043115//GO:0016491	precorrin-2 dehydrogenase activity//oxidoreductase activity	At3g52880	Monodehydroascorbate/ferredoxin reductase
transcript_HQ_TX_pn_transcript64308/f4p0/1465	1465	57.6	6.1e-95	XP_001781580.1	predicted protein [Physcomitrella patens]	93.182	3.71e-07	XM_015761103.1	PREDICTED: Oryza sativa Japonica Group peroxidase 1-like (LOC4351067), mRNA	K00430	E1.11.1.7	peroxidase	1.11.1.7	ko00940; Metabolism; Biosynthesis of other secondary metabolites; Phenylpropanoid biosynthesis	46.6	5.8e-75	sp|Q42578|PER53_ARATH	Peroxidase 53 OS=Arabidopsis thaliana GN=PER53 PE=1 SV=1	PF00141:Peroxidase	GO:0006979//GO:0055114	response to oxidative stress//oxidation-reduction process	--	--	GO:0020037//GO:0004601	heme binding//peroxidase activity	--	--
transcript_HQ_TX_pn_transcript51350/f8p0/1836	1836	68.8	1.8e-51	XP_001781970.1	predicted protein [Physcomitrella patens]	--	--	--	--	-	-	-	-	-	--	--	--	--	PF12906:RING-variant domain;PF00487:Fatty acid desaturase;PF13639:Ring finger domain	GO:0006629	lipid metabolic process	--	--	GO:0005515//GO:0008270	protein binding//zinc ion binding	At2g45530	Protein involved in mRNA turnover and stability
transcript_HQ_TX_pn_transcript2506/f2p0/4158	4158	42.9	3.4e-143	XP_001766442.1	predicted protein [Physcomitrella patens]	--	--	--	--	-	-	-	-	-	55.4	7.5e-19	sp|Q84WK0|BH085_ARATH	Transcription factor bHLH85 OS=Arabidopsis thaliana GN=BHLH85 PE=2 SV=1	PF00010:Helix-loop-helix DNA-binding domain	--	--	--	--	GO:0046983	protein dimerization activity	--	--
transcript_HQ_TX_pn_transcript69761/f2p0/1216	1217	38.3	4.4e-38	XP_001765564.1	predicted protein [Physcomitrella patens]	--	--	--	--	-	-	-	-	-	--	--	--	--	PF00403:Heavy-metal-associated domain	GO:0030001	metal ion transport	--	--	GO:0046872	metal ion binding	--	--
transcript_HQ_TX_pn_transcript40953/f21p0/2065	2065	63.4	7.9e-173	XP_001781614.1	predicted protein [Physcomitrella patens]	80.22	5.27e-07	XM_011102845.1	PREDICTED: Sesamum indicum cytochrome P450 704C1-like (LOC105179242), mRNA	K20495	CYP704B1	long-chain fatty acid omega-monooxygenase	1.14.13.205	-	40.6	2.7e-110	sp|Q9C788|C70B1_ARATH	Cytochrome P450 704B1 OS=Arabidopsis thaliana GN=CYP704B1 PE=1 SV=1	PF00067:Cytochrome P450	GO:0055114	oxidation-reduction process	--	--	GO:0020037//GO:0005506//GO:0016705	heme binding//iron ion binding//oxidoreductase activity, acting on paired donors, with incorporation or reduction of molecular oxygen	At1g69500	Cytochrome P450 CYP4/CYP19/CYP26 subfamilies
transcript_HQ_TX_pn_transcript59494/f10p0/1599	1599	87.5	8.6e-119	XP_001767079.1	predicted protein [Physcomitrella patens]	--	--	--	--	K00991	ispD	2-C-methyl-D-erythritol 4-phosphate cytidylyltransferase	2.7.7.60	ko00900; Metabolism; Metabolism of terpenoids and polyketides; Terpenoid backbone biosynthesis	71.5	1.1e-87	sp|Q5N8G1|ISPD_ORYSJ	2-C-methyl-D-erythritol 4-phosphate cytidylyltransferase, chloroplastic OS=Oryza sativa subsp. japonica GN=ISPD PE=2 SV=1	PF01704:UTP--glucose-1-phosphate uridylyltransferase;PF00483:Nucleotidyl transferase	GO:0008152//GO:0009058	metabolic process//biosynthetic process	--	--	GO:0070569//GO:0016779	uridylyltransferase activity//nucleotidyltransferase activity	--	--
transcript_HQ_TX_pn_transcript35333/f2p0/2231	2226	89.9	3.8e-266	XP_001760657.1	GAPN [Physcomitrella patens]	82.809	0	XM_001755111.1	Physcomitrella patens subsp. patens GAPN (ALDH11B) mRNA, complete cds	K00131	gapN	glyceraldehyde-3-phosphate dehydrogenase (NADP+)	1.2.1.9	ko01200; Metabolism; Global and overview maps; Carbon metabolism | ko00010; Metabolism; Carbohydrate metabolism; Glycolysis / Gluconeogenesis | ko00030; Metabolism; Carbohydrate metabolism; Pentose phosphate pathway	77.2	5.4e-234	sp|Q9SNX8|GAPN_APIGR	NADP-dependent glyceraldehyde-3-phosphate dehydrogenase OS=Apium graveolens PE=1 SV=1	PF00171:Aldehyde dehydrogenase family;PF05893:Acyl-CoA reductase (LuxC)	GO:0008152//GO:0055114//GO:0008218	metabolic process//oxidation-reduction process//bioluminescence	--	--	GO:0016491//GO:0003995	oxidoreductase activity//acyl-CoA dehydrogenase activity	At2g24270	Aldehyde dehydrogenase
transcript_HQ_TX_pn_transcript60060/f3p0/1602	1602	71.7	1.6e-168	XP_001756806.1	predicted protein [Physcomitrella patens]	75.85	1.62e-115	XM_002966084.1	Selaginella moellendorffii hypothetical protein, mRNA	-	-	-	-	-	75.3	2.1e-142	sp|O82660|P2SAF_ARATH	Photosystem II stability/assembly factor HCF136, chloroplastic OS=Arabidopsis thaliana GN=HCF136 PE=1 SV=1	--	--	--	--	--	--	--	At5g23120	Sortilin and related receptors
transcript_HQ_TX_pn_transcript49594/f4p0/1873	1873	79.9	3.7e-230	XP_001767245.1	predicted protein [Physcomitrella patens]	--	--	--	--	-	-	-	-	-	36.6	5.6e-83	sp|Q9SBQ9|F3PH_PETHY	Flavonoid 3'-monooxygenase OS=Petunia hybrida GN=CYP75B2 PE=2 SV=1	PF00067:Cytochrome P450	GO:0055114	oxidation-reduction process	--	--	GO:0020037//GO:0005506//GO:0016705	heme binding//iron ion binding//oxidoreductase activity, acting on paired donors, with incorporation or reduction of molecular oxygen	At5g07990	Cytochrome P450 CYP2 subfamily
transcript_HQ_TX_pn_transcript32751/f4p0/2283	2283	80.3	3.3e-212	XP_001756926.1	predicted protein [Physcomitrella patens]	82.256	0	XM_001756874.1	Physcomitrella patens subsp. patens predicted protein (PHYPADRAFT_118689) mRNA, complete cds	-	-	-	-	-	--	--	--	--	PF07992:Pyridine nucleotide-disulphide oxidoreductase;PF01593:Flavin containing amine oxidoreductase;PF01494:FAD binding domain;PF01266:FAD dependent oxidoreductase;PF00070:Pyridine nucleotide-disulphide oxidoreductase;PF01134:Glucose inhibited division protein A	GO:0055114//GO:0008033	oxidation-reduction process//tRNA processing	--	--	GO:0016491//GO:0050660//GO:0071949	oxidoreductase activity//flavin adenine dinucleotide binding//FAD binding	--	--
transcript_HQ_TX_pn_transcript71948/f2p0/1086	1085	53.5	1.2e-52	XP_001781418.1	predicted protein [Physcomitrella patens]	--	--	--	--	-	-	-	-	-	34.7	5.7e-11	sp|P50694|TLP_PRUAV	Glucan endo-1,3-beta-glucosidase OS=Prunus avium PE=1 SV=1	--	--	--	--	--	--	--	--	--
transcript_HQ_TX_pn_transcript19199/f2p0/2741	2741	77.2	3.6e-290	XP_001764751.1	predicted protein [Physcomitrella patens]	--	--	--	--	K07195	EXOC7, EXO70	exocyst complex component 7	-	ko04910; Organismal Systems; Endocrine system; Insulin signaling pathway	35.4	5.3e-114	sp|Q9LZD3|E70A1_ARATH	Exocyst complex component EXO70A1 OS=Arabidopsis thaliana GN=EXO70A1 PE=1 SV=1	PF03081:Exo70 exocyst complex subunit	GO:0006887	exocytosis	GO:0000145	exocyst	--	--	At5g50380	Exocyst component protein and related proteins
transcript_HQ_TX_pn_transcript58364/f2p0/1658	1657	68.1	5.6e-129	XP_001760884.1	predicted protein [Physcomitrella patens]	--	--	--	--	--	--	--	--	--	--	--	--	--	--	--	--	--	--	--	--	--	--
transcript_HQ_TX_pn_transcript56618/f7p0/1696	1697	84.9	6.1e-155	XP_001779434.1	predicted protein [Physcomitrella patens]	--	--	--	--	K13125	NOSIP	nitric oxide synthase-interacting protein	-	-	30.7	6.3e-33	sp|Q55DU4|NOSIP_DICDI	Nitric oxide synthase-interacting protein homolog OS=Dictyostelium discoideum GN=nosip PE=2 SV=1	PF12678:RING-H2 zinc finger domain;PF14634:zinc-RING finger domain;PF01363:FYVE zinc finger;PF00097:Zinc finger, C3HC4 type (RING finger);PF13639:Ring finger domain	--	--	--	--	GO:0046872//GO:0005515//GO:0008270	metal ion binding//protein binding//zinc ion binding	At1g61620	Uncharacterized conserved protein
transcript_HQ_TX_pn_transcript45622/f4p0/1965	1965	42.3	8.1e-26	XP_001762915.1	predicted protein [Physcomitrella patens]	--	--	--	--	-	-	-	-	-	--	--	--	--	PF15491:CST, telomere maintenance, complex subunit CTC1	GO:0000723	telomere maintenance	--	--	--	--	--	--
transcript_HQ_TX_pn_transcript56888/f3p0/1701	1701	56.4	2.7e-70	XP_001783986.1	predicted protein [Physcomitrella patens]	--	--	--	--	-	-	-	-	-	--	--	--	--	--	--	--	--	--	--	--	--	--
transcript_HQ_TX_pn_transcript44450/f4p0/1981	1981	47.4	6.9e-41	XP_001767513.1	predicted protein [Physcomitrella patens]	--	--	--	--	-	-	-	-	-	--	--	--	--	PF00010:Helix-loop-helix DNA-binding domain;PF06377:Adipokinetic hormone	--	--	--	--	GO:0005179//GO:0046983	hormone activity//protein dimerization activity	--	--
transcript_HQ_TX_pn_transcript14778/f3p0/2927	2926	71.1	1.1e-247	XP_001754224.1	TLP1A TIR1-like auxin receptor protein [Physcomitrella patens]	--	--	--	--	K14485	TIR1	transport inhibitor response 1	-	ko04075; Environmental Information Processing; Signal transduction; Plant hormone signal transduction	33.7	8.5e-86	sp|O04197|COI1_ARATH	Coronatine-insensitive protein 1 OS=Arabidopsis thaliana GN=COI1 PE=1 SV=1	PF00646:F-box domain;PF12937:F-box-like;PF13516:Leucine Rich repeat	--	--	--	--	GO:0005515	protein binding	At2g39940	Leucine rich repeat proteins, some proteins contain F-box
transcript_HQ_TX_pn_transcript65828/f2p0/1407	1407	74.1	1.1e-122	XP_001771557.1	predicted protein [Physcomitrella patens]	--	--	--	--	-	-	-	-	-	32.1	1.4e-09	sp|P92918|ALL2_APIGR	Major allergen Api g 1, isoallergen 2 OS=Apium graveolens PE=1 SV=1	PF00407:Pathogenesis-related protein Bet v I family	GO:0006952//GO:0009607	defense response//response to biotic stimulus	--	--	--	--	--	--
transcript_HQ_TX_pn_transcript61021/f4p0/1550	1550	--	--	--	--	91.257	1.01e-62	KC812756.1	Plagiomnium medium clone 41-Pme putative TAS3-like trans-acting siRNA precursor, gene, complete sequence	--	--	--	--	--	--	--	--	--	--	--	--	--	--	--	--	--	--
transcript_HQ_TX_pn_transcript56780/f2p0/1656	1654	87.8	1.3e-218	XP_001785509.1	predicted protein [Physcomitrella patens]	85.387	0	XM_001785457.1	Physcomitrella patens subsp. patens predicted protein (PHYPADRAFT_63601) mRNA, complete cds	-	-	-	-	-	70.4	6.5e-176	sp|Q9SLN5|MAP1A_ARATH	Methionine aminopeptidase 1A OS=Arabidopsis thaliana GN=MAP1A PE=1 SV=1	--	--	--	--	--	--	--	At2g45240	Putative methionine aminopeptidase
transcript_HQ_TX_pn_transcript69872/f2p0/1220	1221	79.2	6.2e-117	XP_001765199.1	predicted protein [Physcomitrella patens]	--	--	--	--	-	-	-	-	-	--	--	--	--	PF05875:Ceramidase	GO:0006672	ceramide metabolic process	GO:0016021	integral component of membrane	GO:0016811	hydrolase activity, acting on carbon-nitrogen (but not peptide) bonds, in linear amides	--	--
transcript_HQ_TX_pn_transcript30590/f2p0/2318	2318	48	1.3e-54	XP_001762527.1	predicted protein [Physcomitrella patens]	81.683	5.67e-37	XM_001773471.1	Physcomitrella patens subsp. patens predicted protein (PHYPADRAFT_168015) mRNA, complete cds	-	-	-	-	-	54.8	2e-21	sp|Q9SND4|HEC2_ARATH	Transcription factor HEC2 OS=Arabidopsis thaliana GN=HEC2 PE=1 SV=1	PF00010:Helix-loop-helix DNA-binding domain	--	--	--	--	GO:0046983	protein dimerization activity	--	--
transcript_HQ_TX_pn_transcript58464/f2p0/1560	1561	68.5	9.5e-54	XP_001765048.1	predicted protein [Physcomitrella patens]	--	--	--	--	-	-	-	-	-	--	--	--	--	PF12906:RING-variant domain;PF02892:BED zinc finger;PF13639:Ring finger domain	--	--	--	--	GO:0003677//GO:0005515//GO:0008270	DNA binding//protein binding//zinc ion binding	At5g05830	Protein involved in mRNA turnover and stability
transcript_HQ_TX_pn_transcript31463/f4p0/2314	2314	80.4	7.8e-238	XP_001775821.1	predicted protein [Physcomitrella patens]	72.458	2.44e-90	XM_002962922.1	Selaginella moellendorffii hypothetical protein, mRNA	K08176	PHO84	MFS transporter, PHS family, inorganic phosphate transporter	-	-	67.9	5.7e-202	sp|Q8VYM2|PHT11_ARATH	Inorganic phosphate transporter 1-1 OS=Arabidopsis thaliana GN=PHT1-1 PE=1 SV=2	PF00083:Sugar (and other) transporter;PF07690:Major Facilitator Superfamily	GO:0055085	transmembrane transport	GO:0016021	integral component of membrane	GO:0022857	transmembrane transporter activity	At5g43350	Inorganic phosphate transporter
transcript_HQ_TX_pn_transcript7031/f10p0/3458	3459	51.4	3.3e-67	OAE30545.1	hypothetical protein AXG93_977s1310 [Marchantia polymorpha subsp. polymorpha]	82.609	1.33e-84	XM_015840127.1	PREDICTED: Oryza brachyantha transcription factor MYB23-like (LOC102704729), mRNA	K09422	MYBP	myb proto-oncogene protein, plant	-	-	81.8	2.1e-51	sp|Q6R0C4|MYB52_ARATH	Transcription factor MYB52 OS=Arabidopsis thaliana GN=MYB52 PE=2 SV=1	PF05324:Sperm antigen HE2	--	--	GO:0005576	extracellular region	--	--	At1g26780	Transcription factor, Myb superfamily
transcript_HQ_TX_pn_transcript3390/f2p0/3974	3974	92.9	9.6e-252	XP_001753441.1	predicted protein [Physcomitrella patens]	84.368	0	XM_001753389.1	Physcomitrella patens subsp. patens predicted protein (PHYPADRAFT_159105) mRNA, complete cds	K14500	BSK	BR-signaling kinase	2.7.11.1	ko04075; Environmental Information Processing; Signal transduction; Plant hormone signal transduction	71.3	3e-195	sp|Q944A7|Y4523_ARATH	Probable serine/threonine-protein kinase At4g35230 OS=Arabidopsis thaliana GN=At4g35230 PE=1 SV=1	PF00515:Tetratricopeptide repeat;PF07714:Protein tyrosine kinase;PF00069:Protein kinase domain	GO:0006468	protein phosphorylation	--	--	GO:0005524//GO:0004672//GO:0005515	ATP binding//protein kinase activity//protein binding	--	--
transcript_HQ_TX_pn_transcript65440/f4p0/1413	1413	89.7	1.9e-98	XP_001768996.1	predicted protein [Physcomitrella patens]	--	--	--	--	K10735	GINS4, SLD5	GINS complex subunit 4	-	-	32	3e-20	sp|Q499W2|SLD5_RAT	DNA replication complex GINS protein SLD5 OS=Rattus norvegicus GN=Gins4 PE=1 SV=1	--	--	--	--	--	--	--	At5g49010	Predicted alpha-helical protein, potentially involved in replication/repair
transcript_HQ_TX_pn_transcript50506/f4p0/1852	1852	72.4	5.6e-186	XP_001782645.1	predicted protein [Physcomitrella patens]	77.719	0	XM_001782593.1	Physcomitrella patens subsp. patens predicted protein (PHYPADRAFT_151423) mRNA, complete cds	-	-	-	-	-	--	--	--	--	--	--	--	--	--	--	--	--	--
transcript_HQ_TX_pn_transcript31892/f8p0/2323	2323	69	1.4e-191	XP_001770765.1	predicted protein [Physcomitrella patens]	--	--	--	--	--	--	--	--	--	--	--	--	--	--	--	--	--	--	--	--	--	--
transcript_HQ_TX_pn_transcript75734/f2p0/740	740	93.2	6.3e-24	XP_001776246.1	predicted protein [Physcomitrella patens]	91.304	2.37e-06	KJ576828.1	Sanionia georgicouncinata voucher m4-2010 small hydrophobic protein 1 (SHP1) gene, partial cds	-	-	-	-	-	75.5	3.4e-15	sp|Q9ARD5|LT02_HORVU	Low temperature-induced protein lt101.2 OS=Hordeum vulgare GN=LT101.2 PE=2 SV=1	--	--	--	--	--	--	--	At3g05890	Stress responsive protein
transcript_HQ_TX_pn_transcript14860/f3p0/2818	2818	94.1	2.4e-79	XP_001758443.1	predicted protein [Physcomitrella patens]	82.961	0	XM_001783731.1	Physcomitrella patens subsp. patens predicted protein (PHYPADRAFT_152827) mRNA, complete cds	-	-	-	-	-	--	--	--	--	--	--	--	--	--	--	--	--	--
transcript_HQ_TX_pn_transcript32003/f2p0/2320	2320	55.2	2.1e-118	XP_001767414.1	predicted protein [Physcomitrella patens]	--	--	--	--	-	-	-	-	-	30.1	5.7e-08	sp|O29470|Y788_ARCFU	Uncharacterized transporter AF_0788 OS=Archaeoglobus fulgidus (strain ATCC 49558 / VC-16 / DSM 4304 / JCM 9628 / NBRC 100126) GN=AF_0788 PE=3 SV=1	PF00892:EamA-like transporter family	--	--	GO:0016021//GO:0016020	integral component of membrane//membrane	--	--	--	--
transcript_HQ_TX_pn_transcript12668/f3p0/3054	3054	76.5	1.1e-191	XP_001768181.1	predicted protein [Physcomitrella patens]	--	--	--	--	K13946	AUX1, LAX	auxin influx carrier (AUX1 LAX family)	-	ko04075; Environmental Information Processing; Signal transduction; Plant hormone signal transduction	50.4	5.2e-118	sp|Q8L883|LAX5_MEDTR	Auxin transporter-like protein 5 OS=Medicago truncatula GN=LAX5 PE=2 SV=1	--	--	--	--	--	--	--	At1g77690	Amino acid transporters
transcript_HQ_TX_pn_transcript32867/f2p0/2286	2286	86.4	7.5e-233	XP_001776801.1	predicted protein [Physcomitrella patens]	71.277	3.23e-64	XM_010273255.2	PREDICTED: Nelumbo nucifera auxin transporter-like protein 2 (LOC104607586), mRNA	K13946	AUX1, LAX	auxin influx carrier (AUX1 LAX family)	-	ko04075; Environmental Information Processing; Signal transduction; Plant hormone signal transduction	67.4	6.7e-187	sp|Q96247|AUX1_ARATH	Auxin transporter protein 1 OS=Arabidopsis thaliana GN=AUX1 PE=1 SV=1	--	--	--	--	--	--	--	At2g38120	Amino acid transporters
transcript_HQ_TX_pn_transcript75867/f3p0/716	716	--	--	--	--	--	--	--	--	--	--	--	--	--	--	--	--	--	PF10186:Vacuolar sorting 38 and autophagy-related subunit 14;PF03760:Late embryogenesis abundant (LEA) group 1	GO:0010508//GO:0009790	positive regulation of autophagy//embryo development	--	--	--	--	--	--
transcript_HQ_TX_pn_transcript37449/f5p0/2165	2165	78.5	1.8e-220	XP_001766299.1	predicted protein [Physcomitrella patens]	--	--	--	--	-	-	-	-	-	36.8	7.7e-76	sp|Q42569|C90A1_ARATH	Cytochrome P450 90A1 OS=Arabidopsis thaliana GN=CYP90A1 PE=2 SV=1	PF00067:Cytochrome P450	GO:0055114	oxidation-reduction process	--	--	GO:0020037//GO:0016705//GO:0005506	heme binding//oxidoreductase activity, acting on paired donors, with incorporation or reduction of molecular oxygen//iron ion binding	At5g05690	Cytochrome P450 CYP4/CYP19/CYP26 subfamilies
transcript_HQ_TX_pn_transcript32479/f5p0/2323	2322	81.5	1.1e-228	XP_001755131.1	predicted protein [Physcomitrella patens]	80.918	0	XM_001755079.1	Physcomitrella patens subsp. patens predicted protein (PHYPADRAFT_159848) mRNA, complete cds	-	-	-	-	-	24	1.9e-11	sp|Q9LFV5|FK111_ARATH	F-box/kelch-repeat protein At5g15710 OS=Arabidopsis thaliana GN=At5g15710 PE=2 SV=1	PF01344:Kelch motif;PF12937:F-box-like;PF00646:F-box domain	--	--	--	--	GO:0005515	protein binding	--	--
transcript_HQ_TX_pn_transcript19938/f7p0/2639	2639	62.5	1.9e-107	XP_001752549.1	predicted protein [Physcomitrella patens]	--	--	--	--	-	-	-	-	-	33.6	1.2e-17	sp|Q8VEG4|EXD2_MOUSE	Exonuclease 3'-5' domain-containing protein 2 OS=Mus musculus GN=Exd2 PE=1 SV=2	PF01612:3'-5' exonuclease	GO:0006139	nucleobase-containing compound metabolic process	--	--	GO:0003676//GO:0008408	nucleic acid binding//3'-5' exonuclease activity	At4g13870	Predicted 3'-5' exonuclease
transcript_HQ_TX_pn_transcript62571/f8p0/1504	1504	92.8	1.1e-213	XP_001778739.1	predicted protein [Physcomitrella patens]	88.547	0	XM_001778687.1	Physcomitrella patens subsp. patens predicted protein (PHYPADRAFT_60419) mRNA, complete cds	K00789	metK	S-adenosylmethionine synthetase	2.5.1.6	ko01230; Metabolism; Global and overview maps; Biosynthesis of amino acids | ko00270; Metabolism; Amino acid metabolism; Cysteine and methionine metabolism	87.4	1.1e-203	sp|P43280|METK1_SOLLC	S-adenosylmethionine synthase 1 OS=Solanum lycopersicum GN=SAM1 PE=2 SV=1	PF00438:S-adenosylmethionine synthetase, N-terminal domain;PF02772:S-adenosylmethionine synthetase, central domain;PF00985:Merozoite Surface Antigen 2 (MSA-2) family;PF02773:S-adenosylmethionine synthetase, C-terminal domain	GO:0007155//GO:0006556	cell adhesion//S-adenosylmethionine biosynthetic process	--	--	GO:0004478	methionine adenosyltransferase activity	At4g01850	S-adenosylmethionine synthetase
transcript_HQ_TX_pn_transcript37683/f2p0/2169	2169	--	--	--	--	--	--	--	--	--	--	--	--	--	--	--	--	--	--	--	--	--	--	--	--	--	--
transcript_HQ_TX_pn_transcript45011/f2p0/1995	1995	72.2	3.3e-128	XP_001783843.1	predicted protein [Physcomitrella patens]	75.624	1.19e-127	XM_001783791.1	Physcomitrella patens subsp. patens predicted protein (PHYPADRAFT_152890) mRNA, partial cds	-	-	-	-	-	--	--	--	--	PF01852:START domain	--	--	--	--	GO:0008289	lipid binding	At1g55960	START domain-containing proteins involved in steroidogenesis/phosphatidylcholine transfer
transcript_HQ_TX_pn_transcript59789/f4p0/1613	1613	50.2	7.3e-49	XP_001783833.1	predicted protein [Physcomitrella patens]	--	--	--	--	-	-	-	-	-	22.4	1.3e-06	sp|Q9ZVD2|NHL13_ARATH	NDR1/HIN1-like protein 13 OS=Arabidopsis thaliana GN=NHL13 PE=2 SV=1	PF00672:HAMP domain	GO:0007165	signal transduction	GO:0016021	integral component of membrane	GO:0004871	signal transducer activity	--	--
transcript_HQ_TX_pn_transcript39752/f7p0/2100	2100	72.7	2.5e-198	XP_001773134.1	predicted protein [Physcomitrella patens]	--	--	--	--	K08730	PTDSS2	phosphatidylserine synthase 2	2.7.8.29	ko00564; Metabolism; Lipid metabolism; Glycerophospholipid metabolism	61.2	1e-149	sp|F4HXY7|PSS1_ARATH	CDP-diacylglycerol--serine O-phosphatidyltransferase 1 OS=Arabidopsis thaliana GN=PSS1 PE=1 SV=1	PF03034:Phosphatidyl serine synthase	GO:0006659	phosphatidylserine biosynthetic process	--	--	--	--	At1g15110	Phosphatidylserine synthase
transcript_HQ_TX_pn_transcript52855/f3p0/1805	1805	49.7	3.2e-37	XP_001768152.1	predicted protein [Physcomitrella patens]	97.368	4.59e-07	XM_001783104.1	Physcomitrella patens subsp. patens predicted protein (PHYPADRAFT_152095) mRNA, complete cds	-	-	-	-	-	48.4	1.8e-09	sp|B7HPL2|DNAJ_BACC7	Chaperone protein DnaJ OS=Bacillus cereus (strain AH187) GN=dnaJ PE=3 SV=1	--	--	--	--	--	--	--	At2g22360	Molecular chaperone (DnaJ superfamily)
transcript_HQ_TX_pn_transcript29009/f2p0/2404	2404	77	4.2e-242	XP_001773131.1	predicted protein [Physcomitrella patens]	84.138	0	XM_001756956.1	Physcomitrella patens subsp. patens predicted protein (PHYPADRAFT_105082) mRNA, complete cds	K09531	DNAJC11	DnaJ homolog subfamily C member 11	-	-	49.2	6.2e-143	sp|Q39079|DNJ13_ARATH	Chaperone protein dnaJ 13 OS=Arabidopsis thaliana GN=ATJ13 PE=1 SV=2	--	--	--	--	--	--	--	At2g35720	Molecular chaperone (DnaJ superfamily)
transcript_HQ_TX_pn_transcript18333/f3p0/2759	2757	71.4	5.8e-155	XP_001752066.1	predicted protein [Physcomitrella patens]	--	--	--	--	-	-	-	-	-	44.9	4.7e-86	sp|A2YW91|PLP2_ORYSI	Patatin-like protein 2 OS=Oryza sativa subsp. indica GN=PLP2 PE=3 SV=1	PF01734:Patatin-like phospholipase	GO:0006629	lipid metabolic process	--	--	--	--	At2g26560	Ca2+-independent phospholipase A2
transcript_HQ_TX_pn_transcript13141/f3p0/3032	3032	77.4	9.8e-289	XP_001758138.1	predicted protein [Physcomitrella patens]	84.544	0	XM_001758086.1	Physcomitrella patens subsp. patens predicted protein (PHYPADRAFT_119967) mRNA, complete cds	-	-	-	-	-	59.2	3.5e-90	sp|Q86IX1|DST1_DICDI	Serine/threonine-protein kinase dst1 OS=Dictyostelium discoideum GN=dst1 PE=3 SV=1	PF00069:Protein kinase domain;PF07714:Protein tyrosine kinase	GO:0006468	protein phosphorylation	--	--	GO:0004672//GO:0005524	protein kinase activity//ATP binding	At1g69220	Mitogen-activated protein kinase kinase kinase kinase (MAP4K), germinal center kinase family
transcript_HQ_TX_pn_transcript47126/f3p0/1942	1942	83	6.6e-198	AML76465.1	putative LOV domain-containing protein [Plagiomnium insigne]	91.229	0	KU698296.1	Plagiomnium insigne isolate BGXB_2081112 putative LOV domain-containing protein mRNA, complete cds	-	-	-	-	-	53.5	1.7e-34	sp|O64511|TLOV1_ARATH	Protein TWIN LOV 1 OS=Arabidopsis thaliana GN=TLP1 PE=1 SV=2	PF00989:PAS fold;PF08447:PAS fold	GO:0006355	regulation of transcription, DNA-templated	--	--	GO:0005515	protein binding	--	--
transcript_HQ_TX_pn_transcript26937/f3p0/2467	2467	83	6.7e-163	XP_001766089.1	predicted protein [Physcomitrella patens]	86.45	0	XM_001767349.1	Physcomitrella patens subsp. patens predicted protein (PHYPADRAFT_132085) mRNA, complete cds	K03239	EIF2B1	translation initiation factor eIF-2B subunit alpha	-	ko03013; Genetic Information Processing; Translation; RNA transport	44	1.2e-64	sp|Q54I81|EI2BA_DICDI	Translation initiation factor eIF-2B subunit alpha OS=Dictyostelium discoideum GN=eif2b1 PE=3 SV=1	PF01008:Initiation factor 2 subunit family	GO:0044237	cellular metabolic process	--	--	--	--	At1g72340	Translation initiation factor 2B, alpha subunit (eIF-2Balpha/GCN3)
transcript_HQ_TX_pn_transcript12174/f2p0/3036	3035	77.2	4e-290	XP_001764751.1	predicted protein [Physcomitrella patens]	--	--	--	--	K07195	EXOC7, EXO70	exocyst complex component 7	-	ko04910; Organismal Systems; Endocrine system; Insulin signaling pathway	35.4	5.9e-114	sp|Q9LZD3|E70A1_ARATH	Exocyst complex component EXO70A1 OS=Arabidopsis thaliana GN=EXO70A1 PE=1 SV=1	PF03081:Exo70 exocyst complex subunit	GO:0006887	exocytosis	GO:0000145	exocyst	--	--	At5g50380	Exocyst component protein and related proteins
transcript_HQ_TX_pn_transcript67022/f2p0/1355	1355	70.3	5.3e-77	XP_001772899.1	predicted protein [Physcomitrella patens]	86.349	3.93e-91	XM_001761234.1	Physcomitrella patens subsp. patens predicted protein (PHYPADRAFT_124138) mRNA, complete cds	K02639	petF	ferredoxin	-	ko00195; Metabolism; Energy metabolism; Photosynthesis	74	1.1e-32	sp|P00238|FER_SCEQU	Ferredoxin OS=Scenedesmus quadricauda PE=1 SV=1	PF00111:2Fe-2S iron-sulfur cluster binding domain	--	--	--	--	GO:0009055//GO:0051536	electron carrier activity//iron-sulfur cluster binding	--	--
transcript_HQ_TX_pn_transcript51060/f3p0/1847	1847	60.5	1.6e-113	AFZ39138.1	TCHQD class glutathione S-transferase [Physcomitrella patens]	--	--	--	--	-	-	-	-	-	33.2	3.5e-29	sp|O80662|TCHQD_ARATH	Glutathione S-transferase TCHQD OS=Arabidopsis thaliana GN=TCHQD PE=2 SV=1	PF13409:Glutathione S-transferase, N-terminal domain;PF13417:Glutathione S-transferase, N-terminal domain;PF02798:Glutathione S-transferase, N-terminal domain	--	--	--	--	GO:0005515	protein binding	At1g77290	Uncharacterized conserved protein (Ganglioside-induced differentiation associated protein 1, GDAP1)
transcript_HQ_TX_pn_transcript54805/f2p0/1760	1762	49.6	1.3e-104	XP_001766970.1	predicted protein [Physcomitrella patens]	--	--	--	--	-	-	-	-	-	26.6	4.1e-11	sp|Q9FHS6|FK119_ARATH	F-box/kelch-repeat protein At5g43190 OS=Arabidopsis thaliana GN=At5g43190 PE=2 SV=1	PF00646:F-box domain;PF12937:F-box-like	--	--	--	--	GO:0005515	protein binding	--	--
transcript_HQ_TX_pn_transcript49511/f7p0/1831	1831	53.2	2.2e-65	XP_001762132.1	predicted protein [Physcomitrella patens]	--	--	--	--	-	-	-	-	-	--	--	--	--	PF07989:Centrosomin N-terminal motif 1	--	--	GO:0005815	microtubule organizing center	--	--	--	--
transcript_HQ_TX_pn_transcript69972/f7p0/1200	1200	75.2	2.8e-130	XP_001763258.1	predicted protein [Physcomitrella patens]	84.528	0	XM_001763206.1	Physcomitrella patens subsp. patens predicted protein (PHYPADRAFT_182810) mRNA, complete cds	K02716	psbO	photosystem II oxygen-evolving enhancer protein 1	-	ko00195; Metabolism; Energy metabolism; Photosynthesis	66.3	1.9e-108	sp|P26320|PSBO_SOLTU	Oxygen-evolving enhancer protein 1, chloroplastic OS=Solanum tuberosum GN=PSBO PE=2 SV=1	PF01716:Manganese-stabilising protein / photosystem II polypeptide	GO:0015979//GO:0042549	photosynthesis//photosystem II stabilization	GO:0009523//GO:0019898//GO:0009654	photosystem II//extrinsic component of membrane//photosystem II oxygen evolving complex	GO:0005509	calcium ion binding	--	--
transcript_HQ_TX_pn_transcript70675/f4p0/1160	1160	41.1	3.9e-12	XP_001774651.1	predicted protein [Physcomitrella patens]	--	--	--	--	-	-	-	-	-	--	--	--	--	--	--	--	--	--	--	--	--	--
transcript_HQ_TX_pn_transcript10072/f4p0/3211	3211	80.4	1.9e-80	XP_001779491.1	predicted protein [Physcomitrella patens]	76.658	7.78e-47	XM_015773754.1	PREDICTED: Oryza sativa Japonica Group NAC domain-containing protein 59 (LOC4333488), mRNA	-	-	-	-	-	72	5.9e-64	sp|O04017|NAC98_ARATH	Protein CUP-SHAPED COTYLEDON 2 OS=Arabidopsis thaliana GN=NAC098 PE=1 SV=1	PF02365:No apical meristem (NAM) protein	GO:0006355	regulation of transcription, DNA-templated	--	--	GO:0003677	DNA binding	--	--
transcript_HQ_TX_pn_transcript73779/f7p0/944	944	71.2	1.3e-61	XP_001753044.1	predicted protein [Physcomitrella patens]	--	--	--	--	-	-	-	-	-	--	--	--	--	PF00301:Rubredoxin;PF01096:Transcription factor S-II (TFIIS);PF01155:Hydrogenase/urease nickel incorporation, metallochaperone, hypA;PF00096:Zinc finger, C2H2 type	GO:0006351//GO:0006464	transcription, DNA-templated//cellular protein modification process	--	--	GO:0003676//GO:0016151//GO:0005506//GO:0008270//GO:0046872	nucleic acid binding//nickel cation binding//iron ion binding//zinc ion binding//metal ion binding	--	--
transcript_HQ_TX_pn_transcript66558/f6p0/1368	1368	--	--	--	--	--	--	--	--	--	--	--	--	--	--	--	--	--	--	--	--	--	--	--	--	--	--
transcript_HQ_TX_pn_transcript53223/f3p0/1830	1830	99.6	5e-272	XP_001778184.1	gamma tubulin [Physcomitrella patens]	89.986	0	XM_001778132.1	Physcomitrella patens subsp. patens gamma tubulin (PHYPADRAFT_170153) mRNA, complete cds	K10389	TUBG	tubulin gamma	-	-	99.6	4.9e-273	sp|Q9XFG3|TBG_PHYPA	Tubulin gamma chain OS=Physcomitrella patens subsp. patens GN=TUBG1 PE=3 SV=1	PF00091:Tubulin/FtsZ family, GTPase domain;PF01288:7,8-dihydro-6-hydroxymethylpterin-pyrophosphokinase (HPPK)	GO:0009396	folic acid-containing compound biosynthetic process	--	--	GO:0003924//GO:0003848	GTPase activity//2-amino-4-hydroxy-6-hydroxymethyldihydropteridine diphosphokinase activity	At3g61650	Gamma tubulin
transcript_HQ_TX_pn_transcript31411/f2p0/2335	2335	71.1	8.1e-41	XP_001762178.1	predicted protein [Physcomitrella patens]	--	--	--	--	K14318	NUP88	nuclear pore complex protein Nup88	-	ko03013; Genetic Information Processing; Translation; RNA transport	40	1.5e-13	sp|Q9FFK6|NUP88_ARATH	Nuclear pore complex protein NUP88 OS=Arabidopsis thaliana GN=NUP88 PE=1 SV=1	--	--	--	--	--	--	--	At5g05680	Nuclear pore complex, Nup88/rNup84 component
transcript_HQ_TX_pn_transcript51217/f2p0/1843	1843	83.8	1.8e-128	XP_001761915.1	predicted protein [Physcomitrella patens]	--	--	--	--	K10144	RCHY1, PIRH2	RING finger and CHY zinc finger domain-containing protein 1	2.3.2.27	ko04120; Genetic Information Processing; Folding, sorting and degradation; Ubiquitin mediated proteolysis | ko04115; Cellular Processes; Cell growth and death; p53 signaling pathway | ko05162; Human Diseases; Infectious diseases: Viral; Measles	57	4e-89	sp|Q8VZK0|MIEL1_ARATH	E3 ubiquitin-protein ligase MIEL1 OS=Arabidopsis thaliana GN=MIEL1 PE=1 SV=1	PF17123:RING-like zinc finger;PF00097:Zinc finger, C3HC4 type (RING finger);PF13639:Ring finger domain;PF14634:zinc-RING finger domain;PF01640:Peptidase C10 family;PF05495:CHY zinc finger	GO:0006508	proteolysis	--	--	GO:0046872//GO:0005515//GO:0008234//GO:0008270	metal ion binding//protein binding//cysteine-type peptidase activity//zinc ion binding	At5g22920	Zn-finger protein
transcript_HQ_TX_pn_transcript69646/f4p0/1203	1203	79.9	1.8e-121	XP_001775453.1	predicted protein [Physcomitrella patens]	83.648	6.73e-168	XM_001758557.1	Physcomitrella patens subsp. patens predicted protein (PHYPADRAFT_120515) mRNA, complete cds	-	-	-	-	-	52.5	9.6e-60	sp|P19954|PRSP1_SPIOL	Ribosome-binding factor PSRP1, chloroplastic OS=Spinacia oleracea GN=PSRP1 PE=1 SV=2	PF02482:Sigma 54 modulation protein / S30EA ribosomal protein	GO:0044238	primary metabolic process	--	--	--	--	--	--
transcript_HQ_TX_pn_transcript10771/f2p0/3097	3097	69.7	4.2e-170	XP_001775825.1	predicted protein [Physcomitrella patens]	--	--	--	--	-	-	-	-	-	29.3	1.5e-48	sp|Q4VYC8|NSP1_MEDTR	Nodulation-signaling pathway 1 protein OS=Medicago truncatula GN=NSP1 PE=1 SV=1	PF05204:Homing endonuclease	GO:0030908	protein splicing	--	--	GO:0004519//GO:0003677	endonuclease activity//DNA binding	--	--
transcript_HQ_TX_pn_transcript20581/f8p0/2632	2632	69.5	5.1e-225	XP_001761310.1	predicted protein [Physcomitrella patens]	--	--	--	--	K14539	LSG1	large subunit GTPase 1	3.6.1.-	ko03008; Genetic Information Processing; Translation; Ribosome biogenesis in eukaryotes	54	5.8e-134	sp|Q9SJF1|LSG12_ARATH	GTPase LSG1-2 OS=Arabidopsis thaliana GN=LSG1-2 PE=1 SV=1	PF02421:Ferrous iron transport protein B;PF03193:Protein of unknown function, DUF258;PF00150:Cellulase (glycosyl hydrolase family 5);PF04548:AIG1 family;PF01926:50S ribosome-binding GTPase	GO:0005975	carbohydrate metabolic process	--	--	GO:0003924//GO:0004553//GO:0005525	GTPase activity//hydrolase activity, hydrolyzing O-glycosyl compounds//GTP binding	At1g08410	Predicted GTP-binding protein MMR1
transcript_HQ_TX_pn_transcript63638/f3p0/1513	1513	57.3	3.8e-76	XP_001766424.1	predicted protein [Physcomitrella patens]	--	--	--	--	K13456	RIN4	RPM1-interacting protein 4	-	ko04626; Organismal Systems; Environmental adaptation; Plant-pathogen interaction	59.2	1.5e-06	sp|Q8S3M3|NOIL_ELAOL	NOI-like protein OS=Elaeis oleifera PE=2 SV=1	--	--	--	--	--	--	--	--	--
transcript_HQ_TX_pn_transcript2290/f4p0/4155	4154	55.3	2.3e-86	OAE23451.1	hypothetical protein AXG93_285s1080 [Marchantia polymorpha subsp. polymorpha]	--	--	--	--	-	-	-	-	-	70.2	1.4e-38	sp|Q9C7B1|TRP3_ARATH	Telomere repeat-binding protein 3 OS=Arabidopsis thaliana GN=TRP3 PE=1 SV=1	--	--	--	--	--	--	--	--	--
transcript_HQ_TX_pn_transcript34808/f6p0/2192	2192	89.1	5.2e-58	XP_001771284.1	predicted protein [Physcomitrella patens]	81.329	7.96e-120	XM_001771232.1	Physcomitrella patens subsp. patens predicted protein (PHYPADRAFT_167103) mRNA, complete cds	-	-	-	-	-	61.9	1.1e-29	sp|Q9LT23|BH121_ARATH	Transcription factor bHLH121 OS=Arabidopsis thaliana GN=BHLH121 PE=2 SV=1	PF00010:Helix-loop-helix DNA-binding domain;PF06005:Protein of unknown function (DUF904);PF13851:Growth-arrest specific micro-tubule binding;PF04977:Septum formation initiator;PF06156:Protein of unknown function (DUF972);PF05615:Tho complex subunit 7;PF06320:GCN5-like protein 1 (GCN5L1);PF16740:Spindle and kinetochore-associated protein 2;PF04111:Autophagy protein Apg6	GO:0048870//GO:0006397//GO:0051301//GO:0090529//GO:0006914//GO:0007059//GO:0043093//GO:0006260//GO:0007049	cell motility//mRNA processing//cell division//cell septum assembly//autophagy//chromosome segregation//FtsZ-dependent cytokinesis//DNA replication//cell cycle	GO:0031083//GO:0005876//GO:0000940//GO:0000445//GO:0031514//GO:0005737	BLOC-1 complex//spindle microtubule//condensed chromosome outer kinetochore//THO complex part of transcription export complex//motile cilium//cytoplasm	GO:0008017//GO:0046983	microtubule binding//protein dimerization activity	--	--
transcript_HQ_TX_pn_transcript44200/f5p0/1990	1990	91.5	2e-112	XP_001751820.1	predicted protein [Physcomitrella patens]	84.367	0	XM_001751768.1	Physcomitrella patens subsp. patens predicted protein (PHYPADRAFT_51607) mRNA, partial cds	-	-	-	-	-	--	--	--	--	PF08294:TIM21	GO:0030150	protein import into mitochondrial matrix	GO:0005744	mitochondrial inner membrane presequence translocase complex	--	--	--	--
transcript_HQ_TX_pn_transcript18345/f2p0/2777	2777	76.4	4.8e-117	XP_001781460.1	predicted protein [Physcomitrella patens]	--	--	--	--	K10571	DET1	de-etiolated-1	-	ko04120; Genetic Information Processing; Folding, sorting and degradation; Ubiquitin mediated proteolysis	55.8	9.6e-79	sp|Q9ZNU6|DET1_SOLLC	Light-mediated development protein DET1 OS=Solanum lycopersicum GN=DET1 PE=1 SV=1	--	--	--	--	--	--	--	At4g10180	Negative regulator of histones
transcript_HQ_TX_pn_transcript2720/f5p0/4061	4061	78.8	0	XP_001753618.1	predicted protein [Physcomitrella patens]	80.019	0	XM_001753566.1	Physcomitrella patens subsp. patens predicted protein (PHYPADRAFT_159159) mRNA, complete cds	K01231	MAN2	alpha-mannosidase II	3.2.1.114	ko00510; Metabolism; Glycan biosynthesis and metabolism; N-Glycan biosynthesis | ko00513; Metabolism; Glycan biosynthesis and metabolism; Various types of N-glycan biosynthesis	52.4	3.8e-310	sp|Q9LFR0|GMAN2_ARATH	Alpha-mannosidase 2 OS=Arabidopsis thaliana GN=GMII PE=1 SV=1	PF01074:Glycosyl hydrolases family 38 N-terminal domain;PF09261:Alpha mannosidase middle domain;PF07748:Glycosyl hydrolases family 38 C-terminal domain	GO:0005975//GO:0006013	carbohydrate metabolic process//mannose metabolic process	--	--	GO:0004553//GO:0004559//GO:0008270//GO:0015923	hydrolase activity, hydrolyzing O-glycosyl compounds//alpha-mannosidase activity//zinc ion binding//mannosidase activity	At5g14950	Glycosyl hydrolase, family 38 - alpha-mannosidase
transcript_HQ_TX_pn_transcript44722/f3p0/1985	1981	83.3	1.3e-177	XP_001781358.1	predicted protein [Physcomitrella patens]	79.467	0	XM_001764839.1	Physcomitrella patens subsp. patens predicted protein (PHYPADRAFT_233086) mRNA, complete cds	-	-	-	-	-	23.5	9.4e-20	sp|Q9LFV5|FK111_ARATH	F-box/kelch-repeat protein At5g15710 OS=Arabidopsis thaliana GN=At5g15710 PE=2 SV=1	PF07646:Kelch motif;PF01344:Kelch motif;PF12937:F-box-like;PF00646:F-box domain	--	--	--	--	GO:0005515	protein binding	--	--
transcript_HQ_TX_pn_transcript38755/f2p0/2129	2129	80.7	3.4e-211	XP_001764483.1	predicted protein [Physcomitrella patens]	--	--	--	--	-	-	-	-	-	49.2	1e-109	sp|Q9C626|FB37_ARATH	F-box protein At1g47056 OS=Arabidopsis thaliana GN=At1g47056 PE=2 SV=1	PF00646:F-box domain;PF12937:F-box-like;PF13516:Leucine Rich repeat	--	--	--	--	GO:0005515	protein binding	At1g47056	Leucine rich repeat proteins, some proteins contain F-box
transcript_HQ_TX_pn_transcript66713/f2p0/1372	1372	89.7	4.2e-37	XP_001765849.1	predicted protein [Physcomitrella patens]	--	--	--	--	K14972	PAXIP1, PTIP	PAX-interacting protein 1	-	-	--	--	--	--	--	--	--	--	--	--	--	--	--
transcript_HQ_TX_pn_transcript36373/f5p0/2163	2163	75.8	2.5e-206	XP_001771454.1	predicted protein [Physcomitrella patens]	--	--	--	--	-	-	-	-	-	38.1	1e-88	sp|Q8VYE5|E1312_ARATH	Glucan endo-1,3-beta-glucosidase 12 OS=Arabidopsis thaliana GN=At4g29360 PE=1 SV=1	PF00332:Glycosyl hydrolases family 17;PF08491:Squalene epoxidase	GO:0005975//GO:0055114	carbohydrate metabolic process//oxidation-reduction process	GO:0016021	integral component of membrane	GO:0004553//GO:0004506//GO:0050660	hydrolase activity, hydrolyzing O-glycosyl compounds//squalene monooxygenase activity//flavin adenine dinucleotide binding	--	--
transcript_HQ_TX_pn_transcript16366/f3p0/2863	2863	88	0	XP_001751656.1	predicted protein [Physcomitrella patens]	84.607	0	XM_001771003.1	Physcomitrella patens subsp. patens predicted protein (PHYPADRAFT_136941) mRNA, complete cds	K01610	E4.1.1.49, pckA	phosphoenolpyruvate carboxykinase (ATP)	4.1.1.49	ko01200; Metabolism; Global and overview maps; Carbon metabolism | ko00010; Metabolism; Carbohydrate metabolism; Glycolysis / Gluconeogenesis | ko00020; Metabolism; Carbohydrate metabolism; Citrate cycle (TCA cycle) | ko00620; Metabolism; Carbohydrate metabolism; Pyruvate metabolism | ko00710; Metabolism; Energy metabolism; Carbon fixation in photosynthetic organisms	70.4	4.9e-280	sp|Q9T074|PCKA_ARATH	Phosphoenolpyruvate carboxykinase (ATP) OS=Arabidopsis thaliana GN=PCKA PE=1 SV=1	PF01293:Phosphoenolpyruvate carboxykinase	GO:0006094	gluconeogenesis	--	--	GO:0005524//GO:0004612	ATP binding//phosphoenolpyruvate carboxykinase (ATP) activity	--	--
transcript_HQ_TX_pn_transcript38500/f4p0/2145	2145	44.6	1.5e-118	XP_001775913.1	predicted protein [Physcomitrella patens]	--	--	--	--	K05280	E1.14.13.21	flavonoid 3'-monooxygenase	1.14.13.21	ko00941; Metabolism; Biosynthesis of other secondary metabolites; Flavonoid biosynthesis | ko00944; Metabolism; Biosynthesis of other secondary metabolites; Flavone and flavonol biosynthesis	32.5	4.1e-69	sp|S4UX02|CYPH1_SALMI	Ferruginol synthase OS=Salvia miltiorrhiza GN=CYP76AH1 PE=1 SV=1	PF00067:Cytochrome P450	GO:0055114	oxidation-reduction process	--	--	GO:0016705//GO:0005506//GO:0020037	oxidoreductase activity, acting on paired donors, with incorporation or reduction of molecular oxygen//iron ion binding//heme binding	At2g30750	Cytochrome P450 CYP2 subfamily
transcript_HQ_TX_pn_transcript66616/f2p0/1375	1375	46.1	1.6e-52	XP_001769461.1	predicted protein [Physcomitrella patens]	--	--	--	--	K10798	PARP	poly [ADP-ribose] polymerase	2.4.2.30	ko03410; Genetic Information Processing; Replication and repair; Base excision repair | ko04210; Cellular Processes; Cell growth and death; Apoptosis | ko04214; Cellular Processes; Cell growth and death; Apoptosis - fly | ko04212; Organismal Systems; Aging; Longevity regulating pathway - worm	33.9	6.7e-33	sp|Q9ZP54|PARP1_ARATH	Poly [ADP-ribose] polymerase 1 OS=Arabidopsis thaliana GN=PARP1 PE=1 SV=2	PF00645:Poly(ADP-ribose) polymerase and DNA-Ligase Zn-finger region	--	--	--	--	GO:0003677//GO:0008270	DNA binding//zinc ion binding	At2g31320	NAD+ ADP-ribosyltransferase Parp, required for poly-ADP ribosylation of nuclear proteins
transcript_HQ_TX_pn_transcript59925/f8p0/1561	1563	88	3.1e-153	XP_001764599.1	predicted protein [Physcomitrella patens]	87.708	0	XM_001784955.1	Physcomitrella patens subsp. patens predicted protein (PHYPADRAFT_200520) mRNA, complete cds	K05863	SLC25A4S, ANT	solute carrier family 25 (mitochondrial adenine nucleotide translocator), member 4/5/6/31	-	ko04020; Environmental Information Processing; Signal transduction; Calcium signaling pathway | ko04022; Environmental Information Processing; Signal transduction; cGMP-PKG signaling pathway | ko05012; Human Diseases; Neurodegenerative diseases; Parkinson's disease | ko05016; Human Diseases; Neurodegenerative diseases; Huntington's disease | ko05166; Human Diseases; Infectious diseases: Viral; HT…	65.6	2.6e-134	sp|P12857|ADT2_MAIZE	ADP,ATP carrier protein 2, mitochondrial OS=Zea mays GN=ANT2 PE=2 SV=2	--	--	--	--	--	--	--	At5g13490	Mitochondrial ADP/ATP carrier proteins
transcript_HQ_TX_pn_transcript66830/f2p0/1364	1364	71	2.3e-141	XP_001775515.1	predicted protein [Physcomitrella patens]	84.301	0	XM_001775463.1	Physcomitrella patens subsp. patens predicted protein (PHYPADRAFT_168879) mRNA, complete cds	-	-	-	-	-	28	6.2e-15	sp|B5ERI2|TRPC_ACIF5	Indole-3-glycerol phosphate synthase OS=Acidithiobacillus ferrooxidans (strain ATCC 53993) GN=trpC PE=3 SV=1	PF00218:Indole-3-glycerol phosphate synthase	--	--	--	--	GO:0004425	indole-3-glycerol-phosphate synthase activity	At2g04400	Anthranilate synthase component II
transcript_HQ_TX_pn_transcript54917/f3p0/1759	1759	52.3	4.8e-54	XP_001765681.1	predicted protein [Physcomitrella patens]	--	--	--	--	-	-	-	-	-	42.7	5.9e-42	sp|Q9LET3|RBL20_ARATH	Rhomboid-like protein 20 OS=Arabidopsis thaliana GN=RBL20 PE=2 SV=1	PF01694:Rhomboid family	--	--	GO:0016021	integral component of membrane	GO:0004252	serine-type endopeptidase activity	At3g56740	Uncharacterized conserved protein
transcript_HQ_TX_pn_transcript19275/f2p0/2736	2736	35.5	1.1e-36	XP_001765732.1	predicted protein [Physcomitrella patens]	--	--	--	--	-	-	-	-	-	35.8	3.8e-19	sp|Q55A09|Y9963_DICDI	Probable serine/threonine-protein kinase DDB_G0272254 OS=Dictyostelium discoideum GN=DDB_G0272254 PE=3 SV=1	PF07714:Protein tyrosine kinase;PF00069:Protein kinase domain	GO:0006468	protein phosphorylation	--	--	GO:0005524//GO:0004672	ATP binding//protein kinase activity	At1g16270_2	Tyrosine kinase specific for activated (GTP-bound) p21cdc42Hs
transcript_HQ_TX_pn_transcript37621/f11p0/2153	2153	75.9	2.5e-222	XP_001762127.1	predicted protein [Physcomitrella patens]	75.337	0	XM_001762075.1	Physcomitrella patens subsp. patens predicted protein (PHYPADRAFT_109809) mRNA, complete cds	K08176	PHO84	MFS transporter, PHS family, inorganic phosphate transporter	-	-	62	9.4e-183	sp|Q8H6H2|PHT14_ORYSJ	Probable inorganic phosphate transporter 1-4 OS=Oryza sativa subsp. japonica GN=PHT1-4 PE=2 SV=1	PF07690:Major Facilitator Superfamily;PF00083:Sugar (and other) transporter	GO:0055085	transmembrane transport	GO:0016021	integral component of membrane	GO:0022857	transmembrane transporter activity	At2g32830	Inorganic phosphate transporter
transcript_HQ_TX_pn_transcript22707/f3p0/2558	2557	90.9	1.2e-223	XP_001768253.1	tubby-like protein [Physcomitrella patens]	82.165	0	XM_001777454.1	Physcomitrella patens subsp. patens predicted protein (PHYPADRAFT_221905) mRNA, complete cds	-	-	-	-	-	60.8	3.8e-138	sp|Q10LG8|TLP6_ORYSJ	Tubby-like F-box protein 6 OS=Oryza sativa subsp. japonica GN=TULP6 PE=2 SV=1	PF00646:F-box domain;PF12937:F-box-like	--	--	--	--	GO:0005515	protein binding	At2g47900	Tub family proteins
transcript_HQ_TX_pn_transcript57987/f2p0/1674	1674	47.3	1.6e-59	XP_001781955.1	predicted protein [Physcomitrella patens]	--	--	--	--	-	-	-	-	-	35.7	2.4e-08	sp|Q9LF57|HIP21_ARATH	Heavy metal-associated isoprenylated plant protein 21 OS=Arabidopsis thaliana GN=HIPP21 PE=1 SV=1	PF00403:Heavy-metal-associated domain	GO:0030001	metal ion transport	--	--	GO:0046872	metal ion binding	At5g17450	Copper chaperone
transcript_HQ_TX_pn_transcript51211/f2p0/1769	1770	97.5	1.6e-262	XP_001769421.1	predicted protein [Physcomitrella patens]	86.079	0	XM_001782145.1	Physcomitrella patens subsp. patens predicted protein (PHYPADRAFT_225537) mRNA, complete cds	K10956	SEC61A	protein transport protein SEC61 subunit alpha	-	ko03060; Genetic Information Processing; Folding, sorting and degradation; Protein export | ko04141; Genetic Information Processing; Folding, sorting and degradation; Protein processing in endoplasmic reticulum | ko04145; Cellular Processes; Transport and catabolism; Phagosome | ko05110; Human Diseases; Infectious diseases: Bacterial; Vibrio cholerae infection	71.7	1.3e-198	sp|Q54XK2|SC61A_DICDI	Protein transport protein Sec61 subunit alpha OS=Dictyostelium discoideum GN=sec61a PE=3 SV=1	PF00344:SecY translocase	GO:0015031	protein transport	GO:0016020	membrane	--	--	At2g34250	Transport protein Sec61, alpha subunit
transcript_HQ_TX_pn_transcript59836/f3p0/1612	1612	72.9	9e-100	XP_001781750.1	predicted protein [Physcomitrella patens]	78.398	2.03e-139	AB369257.1	Physcomitrella patens pphn39k21 mRNA for protein phosphatase 2C, complete cds	-	-	-	-	-	66.3	1.1e-87	sp|Q9SIU8|P2C20_ARATH	Probable protein phosphatase 2C 20 OS=Arabidopsis thaliana GN=PPC3-1.2 PE=1 SV=3	PF00481:Protein phosphatase 2C;PF07228:Stage II sporulation protein E (SpoIIE)	--	--	--	--	GO:0003824	catalytic activity	At2g20630	Serine/threonine protein phosphatase
transcript_HQ_TX_pn_transcript52241/f2p0/1730	1729	60.3	1.7e-35	XP_001783543.1	predicted protein [Physcomitrella patens]	75.061	1.17e-37	XM_001783491.1	Physcomitrella patens subsp. patens predicted protein (PHYPADRAFT_98841) mRNA, complete cds	-	-	-	-	-	39	1.4e-06	sp|P78317|RNF4_HUMAN	E3 ubiquitin-protein ligase RNF4 OS=Homo sapiens GN=RNF4 PE=1 SV=1	PF13639:Ring finger domain;PF12861:Anaphase-promoting complex subunit 11 RING-H2 finger;PF14634:zinc-RING finger domain;PF11789:Zinc-finger of the MIZ type in Nse subunit;PF12678:RING-H2 zinc finger domain;PF17123:RING-like zinc finger;PF00097:Zinc finger, C3HC4 type (RING finger);PF16685:zinc RING finger of MSL2	--	--	GO:0005680	anaphase-promoting complex	GO:0061630//GO:0004842//GO:0005515//GO:0046872//GO:0008270	ubiquitin protein ligase activity//ubiquitin-protein transferase activity//protein binding//metal ion binding//zinc ion binding	At3g07200	Predicted E3 ubiquitin ligase
transcript_HQ_TX_pn_transcript66902/f3p0/1372	1372	73.1	1.3e-83	XP_001772796.1	predicted protein [Physcomitrella patens]	--	--	--	--	-	-	-	-	-	34.9	6.9e-22	sp|Q9LZX1|LOR15_ARATH	Protein LURP-one-related 15 OS=Arabidopsis thaliana GN=At5g01750 PE=1 SV=1	--	--	--	--	--	--	--	--	--
transcript_HQ_TX_pn_transcript15203/f3p0/2914	2914	57.9	6.3e-144	XP_001765366.1	predicted protein [Physcomitrella patens]	81.722	4.73e-148	XM_001765314.1	Physcomitrella patens subsp. patens predicted protein (PHYPADRAFT_229394) mRNA, complete cds	-	-	-	-	-	--	--	--	--	PF02252:Proteasome activator pa28 beta subunit	--	--	GO:0008537	proteasome activator complex	--	--	--	--
transcript_HQ_TX_pn_transcript50069/f2p0/1872	1872	82.1	1.6e-164	XP_001766765.1	predicted protein [Physcomitrella patens]	82.322	0	XM_001766713.1	Physcomitrella patens subsp. patens predicted protein (PHYPADRAFT_185852) mRNA, complete cds	K13436	PTI1	pto-interacting protein 1	2.7.11.1	ko04626; Organismal Systems; Environmental adaptation; Plant-pathogen interaction	69	4.7e-138	sp|Q8H1G6|PTI11_ARATH	PTI1-like tyrosine-protein kinase 1 OS=Arabidopsis thaliana GN=PTI11 PE=1 SV=1	PF00069:Protein kinase domain;PF07714:Protein tyrosine kinase	GO:0006468	protein phosphorylation	--	--	GO:0005524//GO:0004672	ATP binding//protein kinase activity	At1g06700	Serine/threonine protein kinase
transcript_HQ_TX_pn_transcript46941/f2p0/1947	1947	68.2	6.3e-156	XP_001785848.1	predicted protein [Physcomitrella patens]	82.219	8.5e-169	XM_001785796.1	Physcomitrella patens subsp. patens predicted protein (PHYPADRAFT_4214) mRNA, partial cds	-	-	-	-	-	39.9	1.1e-73	sp|Q8L7E9|MCAC1_ARATH	Protein MID1-COMPLEMENTING ACTIVITY 1 OS=Arabidopsis thaliana GN=MCA1 PE=1 SV=1	--	--	--	--	--	--	--	--	--
transcript_HQ_TX_pn_transcript3039/f3p0/4014	4014	54.4	6.2e-307	OAE20129.1	hypothetical protein AXG93_3818s1270 [Marchantia polymorpha subsp. polymorpha]	--	--	--	--	-	-	-	-	-	36.3	5.7e-40	sp|Q9FI14|TAO1_ARATH	Disease resistance protein TAO1 OS=Arabidopsis thaliana GN=TAO1 PE=4 SV=1	PF03193:Protein of unknown function, DUF258;PF13855:Leucine rich repeat;PF00437:Type II/IV secretion system protein;PF00931:NB-ARC domain;PF00006:ATP synthase alpha/beta family, nucleotide-binding domain;PF01637:ATPase domain predominantly from Archaea;PF00196:Bacterial regulatory proteins, luxR family;PF00005:ABC transporter	GO:0006355//GO:0006810	regulation of transcription, DNA-templated//transport	--	--	GO:0003924//GO:0043531//GO:0016887//GO:0005524//GO:0005525//GO:0005515	GTPase activity//ADP binding//ATPase activity//ATP binding//GTP binding//protein binding	--	--
transcript_HQ_TX_pn_transcript59132/f2p0/1637	1637	66.3	1e-18	XP_001761636.1	predicted protein [Physcomitrella patens]	--	--	--	--	-	-	-	-	-	--	--	--	--	--	--	--	--	--	--	--	--	--
transcript_HQ_TX_pn_transcript17043/f2p0/2829	2830	77.7	0	XP_001777839.1	predicted protein [Physcomitrella patens]	83.575	0	XM_001777787.1	Physcomitrella patens subsp. patens predicted protein (PHYPADRAFT_92578) mRNA, complete cds	K12349	ASAH2	neutral ceramidase	3.5.1.23	ko00600; Metabolism; Lipid metabolism; Sphingolipid metabolism | ko04071; Environmental Information Processing; Signal transduction; Sphingolipid signaling pathway	62.1	6.6e-277	sp|Q304B9|NCASE_ARATH	Neutral ceramidase OS=Arabidopsis thaliana GN=At2g38010 PE=3 SV=1	PF01835:MG2 domain	--	--	--	--	GO:0004866	endopeptidase inhibitor activity	At1g07380	Ceramidases
transcript_HQ_TX_pn_transcript60274/f3p0/1422	1422	68.3	5.9e-79	XP_001752277.1	predicted protein [Physcomitrella patens]	--	--	--	--	-	-	-	-	-	--	--	--	--	PF02674:Colicin V production protein	GO:0009403	toxin biosynthetic process	GO:0016020	membrane	--	--	--	--
transcript_HQ_TX_pn_transcript59463/f8p0/1625	1625	57.1	1.5e-81	XP_001766957.1	predicted protein [Physcomitrella patens]	--	--	--	--	-	-	-	-	-	--	--	--	--	PF04961:Formiminotransferase-cyclodeaminase	GO:0044237	cellular metabolic process	--	--	GO:0003824	catalytic activity	--	--
transcript_HQ_TX_pn_transcript34882/f2p0/2229	2229	56.8	7.3e-132	OAE34786.1	hypothetical protein AXG93_2528s1520 [Marchantia polymorpha subsp. polymorpha]	97.436	1.58e-07	LT669794.1	Arabis alpina genome assembly, chromosome: chr7	-	-	-	-	-	39.3	2.1e-07	sp|Q49Y21|DNAJ_STAS1	Chaperone protein DnaJ OS=Staphylococcus saprophyticus subsp. saprophyticus (strain ATCC 15305 / DSM 20229) GN=dnaJ PE=3 SV=1	--	--	--	--	--	--	--	At5g23240	Molecular chaperone (DnaJ superfamily)
transcript_HQ_TX_pn_transcript9814/f4p0/3247	3246	76.6	9.3e-213	XP_001777008.1	predicted protein [Physcomitrella patens]	79.574	0	XM_001776956.1	Physcomitrella patens subsp. patens predicted protein (PHYPADRAFT_144326) mRNA, complete cds	K00901	dgkA, DGK	diacylglycerol kinase (ATP)	2.7.1.107	ko00561; Metabolism; Lipid metabolism; Glycerolipid metabolism | ko00564; Metabolism; Lipid metabolism; Glycerophospholipid metabolism | ko04070; Environmental Information Processing; Signal transduction; Phosphatidylinositol signaling system | ko04072; Environmental Information Processing; Signal transduction; Phospholipase D signaling pathway | ko05231; Human Diseases; Cancers: Overview; Cholin…	41.2	4.1e-105	sp|F4JQ95|DGK7_ARATH	Diacylglycerol kinase 7 OS=Arabidopsis thaliana GN=DGK7 PE=1 SV=1	PF00781:Diacylglycerol kinase catalytic domain;PF00609:Diacylglycerol kinase accessory domain	GO:0007205	protein kinase C-activating G-protein coupled receptor signaling pathway	--	--	GO:0016301//GO:0004143	kinase activity//diacylglycerol kinase activity	At5g57690	Diacylglycerol kinase
transcript_HQ_TX_pn_transcript66736/f2p0/1369	1369	50	5.8e-23	XP_001754671.1	predicted protein [Physcomitrella patens]	--	--	--	--	-	-	-	-	-	--	--	--	--	--	--	--	--	--	--	--	--	--
transcript_HQ_TX_pn_transcript47899/f6p0/1912	1912	52.9	5.3e-139	XP_001752375.1	predicted protein [Physcomitrella patens]	--	--	--	--	-	-	-	-	-	33.5	5.8e-67	sp|Q9SK82|U85A1_ARATH	UDP-glycosyltransferase 85A1 OS=Arabidopsis thaliana GN=UGT85A1 PE=2 SV=1	PF00201:UDP-glucoronosyl and UDP-glucosyl transferase	GO:0008152	metabolic process	--	--	GO:0016758	transferase activity, transferring hexosyl groups	At1g22400	UDP-glucuronosyl and UDP-glucosyl transferase
transcript_HQ_TX_pn_transcript54123/f4p0/1771	1771	67.9	5e-136	XP_001783179.1	predicted protein [Physcomitrella patens]	78.594	9.21e-44	XM_001775591.1	Physcomitrella patens subsp. patens predicted protein (PHYPADRAFT_90222) mRNA, partial cds	K16302	CNNM	metal transporter CNNM	-	-	57.7	7.9e-119	sp|Q67XQ0|Y4424_ARATH	DUF21 domain-containing protein At4g14240 OS=Arabidopsis thaliana GN=CBSDUF1 PE=1 SV=1	--	--	--	--	--	--	--	At1g03270	Predicted membrane protein, contains two CBS domains
transcript_HQ_TX_pn_transcript54531/f4p0/1716	1716	86.9	2.1e-203	XP_001765132.1	predicted protein [Physcomitrella patens]	78.268	0	XM_001765080.1	Physcomitrella patens subsp. patens predicted protein (PHYPADRAFT_229344) mRNA, complete cds	-	-	-	-	-	22.7	7.4e-13	sp|Q9M310|FBK77_ARATH	F-box/kelch-repeat protein At3g61590 OS=Arabidopsis thaliana GN=At3g61590 PE=1 SV=1	PF00646:F-box domain;PF12937:F-box-like;PF01344:Kelch motif	--	--	--	--	GO:0005515	protein binding	--	--
transcript_HQ_TX_pn_transcript69405/f7p0/1222	1222	--	--	--	--	--	--	--	--	--	--	--	--	--	--	--	--	--	PF05009:Epstein-Barr virus nuclear antigen 3 (EBNA-3)	GO:0016032	viral process	GO:0042025	host cell nucleus	--	--	--	--
transcript_HQ_TX_pn_transcript12153/f2p0/3082	3082	68	9.3e-154	XP_001782303.1	predicted protein [Physcomitrella patens]	75.94	2.2e-07	XM_009129306.2	PREDICTED: Brassica rapa probable arabinosyltransferase ARAD1 (LOC103852401), mRNA	-	-	-	-	-	36.2	4.6e-58	sp|Q6DBG8|ARAD1_ARATH	Probable arabinosyltransferase ARAD1 OS=Arabidopsis thaliana GN=ARAD1 PE=1 SV=1	--	--	--	--	--	--	--	At3g45400	Acetylglucosaminyltransferase EXT1/exostosin 1
transcript_HQ_TX_pn_transcript50742/f12p0/1814	1814	75.1	1.9e-130	XP_001769431.1	predicted protein [Physcomitrella patens]	86.173	0	XM_001769379.1	Physcomitrella patens subsp. patens predicted protein (PHYPADRAFT_187995) mRNA, complete cds	K13127	RNF113A, CWC24	RING finger protein 113A	-	-	59.1	8.4e-100	sp|Q8GX84|C3H1_ARATH	Zinc finger CCCH domain-containing protein 1 OS=Arabidopsis thaliana GN=At1g01350 PE=2 SV=2	PF00097:Zinc finger, C3HC4 type (RING finger);PF13639:Ring finger domain;PF16685:zinc RING finger of MSL2;PF11789:Zinc-finger of the MIZ type in Nse subunit;PF14634:zinc-RING finger domain;PF00642:Zinc finger C-x8-C-x5-C-x3-H type (and similar)	--	--	--	--	GO:0008270//GO:0046872//GO:0005515//GO:0061630	zinc ion binding//metal ion binding//protein binding//ubiquitin protein ligase activity	At1g01350_1	Predicted E3 ubiquitin ligase
transcript_HQ_TX_pn_transcript34521/f3p0/2251	2251	64.3	1.3e-210	XP_001751342.1	predicted protein [Physcomitrella patens]	73.743	2.53e-45	XM_018609783.1	PREDICTED: Raphanus sativus NADP-dependent malic enzyme 3-like (LOC108836651), partial mRNA	K00029	E1.1.1.40, maeB	malate dehydrogenase (oxaloacetate-decarboxylating)(NADP+)	1.1.1.40	ko01200; Metabolism; Global and overview maps; Carbon metabolism | ko00620; Metabolism; Carbohydrate metabolism; Pyruvate metabolism | ko00710; Metabolism; Energy metabolism; Carbon fixation in photosynthetic organisms	59.4	6.3e-198	sp|P51615|MAOX_VITVI	NADP-dependent malic enzyme OS=Vitis vinifera PE=2 SV=1	PF00390:Malic enzyme, N-terminal domain;PF03949:Malic enzyme, NAD binding domain	GO:0055114	oxidation-reduction process	--	--	GO:0051287//GO:0004471	NAD binding//malate dehydrogenase (decarboxylating) (NAD+) activity	At2g19900	NADP+-dependent malic enzyme
transcript_HQ_TX_pn_transcript40567/f2p0/2097	2097	53	1.5e-54	XP_001774977.1	predicted protein [Physcomitrella patens]	--	--	--	--	-	-	-	-	-	--	--	--	--	--	--	--	--	--	--	--	--	--
transcript_HQ_TX_pn_transcript31206/f26p0/2310	2310	80.8	2.4e-239	XP_001775821.1	predicted protein [Physcomitrella patens]	72.472	5.23e-92	XM_002962922.1	Selaginella moellendorffii hypothetical protein, mRNA	K08176	PHO84	MFS transporter, PHS family, inorganic phosphate transporter	-	-	67.7	3.3e-202	sp|Q8VYM2|PHT11_ARATH	Inorganic phosphate transporter 1-1 OS=Arabidopsis thaliana GN=PHT1-1 PE=1 SV=2	PF07690:Major Facilitator Superfamily;PF00083:Sugar (and other) transporter	GO:0055085	transmembrane transport	GO:0016021	integral component of membrane	GO:0022857	transmembrane transporter activity	At5g43350	Inorganic phosphate transporter
transcript_HQ_TX_pn_transcript56747/f3p0/1704	1704	66.9	2.9e-128	XP_001780006.1	predicted protein [Physcomitrella patens]	74.118	5.07e-76	XM_001779954.1	Physcomitrella patens subsp. patens predicted protein (PHYPADRAFT_147916) mRNA, complete cds	-	-	-	-	-	47.9	3.3e-82	sp|Q9SLN8|DBR_TOBAC	2-alkenal reductase (NADP(+)-dependent) OS=Nicotiana tabacum GN=DBR PE=1 SV=1	PF00107:Zinc-binding dehydrogenase	GO:0055114	oxidation-reduction process	--	--	--	--	At3g03080	Predicted NAD-dependent oxidoreductase
transcript_HQ_TX_pn_transcript17956/f5p0/2781	2781	--	--	--	--	--	--	--	--	--	--	--	--	--	--	--	--	--	--	--	--	--	--	--	--	--	--
transcript_HQ_TX_pn_transcript62691/f2p0/1492	1492	85.6	1.5e-112	XP_001760737.1	predicted protein [Physcomitrella patens]	83.088	6.43e-174	XM_001760685.1	Physcomitrella patens subsp. patens predicted protein (PHYPADRAFT_123406) mRNA, complete cds	K01673	cynT, can	carbonic anhydrase	4.2.1.1	ko00910; Metabolism; Energy metabolism; Nitrogen metabolism	51.8	5.7e-54	sp|P40880|CAHC_HORVU	Carbonic anhydrase, chloroplastic OS=Hordeum vulgare PE=2 SV=1	PF00484:Carbonic anhydrase	--	--	--	--	GO:0004089//GO:0008270	carbonate dehydratase activity//zinc ion binding	At5g14740	Predicted carbonic anhydrase involved in protection against oxidative damage
transcript_HQ_TX_pn_transcript20875/f4p0/2684	2684	37.2	1.4e-60	XP_001785051.1	predicted protein [Physcomitrella patens]	--	--	--	--	-	-	-	-	-	--	--	--	--	PF02970:Tubulin binding cofactor A	GO:0007023//GO:0007021	post-chaperonin tubulin folding pathway//tubulin complex assembly	--	--	GO:0048487	beta-tubulin binding	--	--
transcript_HQ_TX_pn_transcript31764/f2p0/2325	2325	31.9	4.8e-70	XP_001755544.1	predicted protein [Physcomitrella patens]	--	--	--	--	-	-	-	-	-	--	--	--	--	--	--	--	--	--	--	--	At4g38640	Choline transporter-like protein
transcript_HQ_TX_pn_transcript41486/f10p0/2059	2059	65.4	7.6e-176	XP_001784337.1	predicted protein [Physcomitrella patens]	--	--	--	--	-	-	-	-	-	31.3	2.7e-30	sp|O22807|GALS1_ARATH	Galactan beta-1,4-galactosyltransferase GALS1 OS=Arabidopsis thaliana GN=GALS1 PE=2 SV=2	--	--	--	--	--	--	--	At5g44670	Extracellular protein with conserved cysteines
transcript_HQ_TX_pn_transcript25309/f3p0/2580	2580	77.8	7.2e-192	XP_001758715.1	predicted protein [Physcomitrella patens]	84.29	9.86e-85	XM_001758663.1	Physcomitrella patens subsp. patens predicted protein (PHYPADRAFT_120709) mRNA, complete cds	-	-	-	-	-	53.1	1.7e-117	sp|Q9FJN7|GCL1_ARATH	LanC-like protein GCL1 OS=Arabidopsis thaliana GN=GCL1 PE=2 SV=1	--	--	--	--	--	--	--	At5g65280	Lanthionine synthetase C-like protein 1
transcript_HQ_TX_pn_transcript63390/f2p0/1451	1451	80.4	1.4e-171	XP_001779905.1	predicted protein [Physcomitrella patens]	85.792	4.49e-46	XM_001779853.1	Physcomitrella patens subsp. patens predicted protein (PHYPADRAFT_196479) mRNA, complete cds	K14574	SDO1, SBDS	ribosome maturation protein SDO1	-	ko03008; Genetic Information Processing; Translation; Ribosome biogenesis in eukaryotes	54.1	6.1e-69	sp|P70122|SBDS_MOUSE	Ribosome maturation protein SBDS OS=Mus musculus GN=Sbds PE=1 SV=4	PF09377:SBDS protein C-terminal domain	GO:0042254	ribosome biogenesis	--	--	--	--	At1g43860_1	Predicted exosome subunit
transcript_HQ_TX_pn_transcript34065/f2p0/2262	2262	45.3	1.7e-72	XP_001785910.1	predicted protein [Physcomitrella patens]	77.114	1.22e-18	XM_001779083.1	Physcomitrella patens subsp. patens predicted protein (PHYPADRAFT_60493) mRNA, complete cds	-	-	-	-	-	61.3	3.9e-30	sp|Q96288|BBX24_ARATH	B-box zinc finger protein 24 OS=Arabidopsis thaliana GN=BBX24 PE=1 SV=1	PF00130:Phorbol esters/diacylglycerol binding domain (C1 domain);PF00643:B-box zinc finger	GO:0035556	intracellular signal transduction	GO:0005622	intracellular	GO:0008270	zinc ion binding	--	--
transcript_HQ_TX_pn_transcript39875/f6p0/2041	2041	94.1	5.6e-163	XP_001764430.1	predicted protein [Physcomitrella patens]	88.108	0	XM_001764378.1	Physcomitrella patens subsp. patens predicted protein (PHYPADRAFT_128069) mRNA, partial cds	K05359	ADT, PDT	arogenate/prephenate dehydratase [EC:4.2.1.91 4.2.1.51]	4.2.1.91,4.2.1.51	ko01230; Metabolism; Global and overview maps; Biosynthesis of amino acids | ko00400; Metabolism; Amino acid metabolism; Phenylalanine, tyrosine and tryptophan biosynthesis	74.4	2e-134	sp|Q9SGD6|AROD6_ARATH	Arogenate dehydratase/prephenate dehydratase 6, chloroplastic OS=Arabidopsis thaliana GN=ADT6 PE=1 SV=1	PF01842:ACT domain;PF00800:Prephenate dehydratase	GO:0008152//GO:0009094	metabolic process//L-phenylalanine biosynthetic process	--	--	GO:0016597//GO:0004664	amino acid binding//prephenate dehydratase activity	At1g08250	Prephenate dehydratase
transcript_HQ_TX_pn_transcript36561/f6p0/2170	2170	85.6	4.4e-283	XP_001778143.1	predicted protein [Physcomitrella patens]	78.601	0	XM_001778091.1	Physcomitrella patens subsp. patens predicted protein (PHYPADRAFT_145746) mRNA, complete cds	K01810	GPI, pgi	glucose-6-phosphate isomerase	5.3.1.9	ko01200; Metabolism; Global and overview maps; Carbon metabolism | ko00010; Metabolism; Carbohydrate metabolism; Glycolysis / Gluconeogenesis | ko00030; Metabolism; Carbohydrate metabolism; Pentose phosphate pathway | ko00500; Metabolism; Carbohydrate metabolism; Starch and sucrose metabolism | ko00520; Metabolism; Carbohydrate metabolism; Amino sugar and nucleotide sugar metabolism	73.3	1.8e-234	sp|Q9FXM5|G6PI_ARAHG	Glucose-6-phosphate isomerase, cytosolic OS=Arabidopsis halleri subsp. gemmifera GN=PGIC PE=3 SV=2	PF00342:Phosphoglucose isomerase	GO:0006094//GO:0006096	gluconeogenesis//glycolytic process	--	--	GO:0004347	glucose-6-phosphate isomerase activity	At5g42740	Glucose-6-phosphate isomerase
transcript_HQ_TX_pn_transcript13672/f7p0/2989	2989	84	0	XP_001780339.1	predicted protein [Physcomitrella patens]	85.859	0	XM_001760206.1	Physcomitrella patens subsp. patens predicted protein (PHYPADRAFT_162270) mRNA, complete cds	K17267	COPG	coatomer subunit gamma	-	-	71.5	0	sp|Q6Z382|COPG2_ORYSJ	Coatomer subunit gamma-2 OS=Oryza sativa subsp. japonica GN=Os07g0201100 PE=2 SV=1	PF02284:Cytochrome c oxidase subunit Va;PF00514:Armadillo/beta-catenin-like repeat;PF01602:Adaptin N terminal region;PF08752:Coatomer gamma subunit appendage platform subdomain	GO:0016192//GO:0006886	vesicle-mediated transport//intracellular protein transport	GO:0030117//GO:0030126//GO:0005743	membrane coat//COPI vesicle coat//mitochondrial inner membrane	GO:0004129//GO:0005515//GO:0005198	cytochrome-c oxidase activity//protein binding//structural molecule activity	At4g34450	Vesicle coat complex COPI, gamma subunit
transcript_HQ_TX_pn_transcript51123/f14p0/1842	1842	50.7	5.2e-75	XP_001752593.1	predicted protein [Physcomitrella patens]	--	--	--	--	K01974	RTCA, rtcA	RNA 3'-terminal phosphate cyclase (ATP)	6.5.1.4	-	33.6	6e-45	sp|O15746|RTCA_DICDI	Probable RNA 3'-terminal phosphate cyclase OS=Dictyostelium discoideum GN=rtca PE=3 SV=1	--	--	--	--	--	--	--	Hs4506589	RNA 3'-terminal phosphate cyclase
transcript_HQ_TX_pn_transcript17482/f3p0/2812	2812	74.3	1.2e-176	XP_001783539.1	predicted protein [Physcomitrella patens]	--	--	--	--	-	-	-	-	-	40.7	9.1e-53	sp|A7HYV8|DER_PARL1	GTPase Der OS=Parvibaculum lavamentivorans (strain DS-1 / DSM 13023 / NCIMB 13966) GN=der PE=3 SV=1	PF08477:Ras of Complex, Roc, domain of DAPkinase;PF02421:Ferrous iron transport protein B;PF03193:Protein of unknown function, DUF258;PF01580:FtsK/SpoIIIE family;PF00025:ADP-ribosylation factor family;PF04548:AIG1 family;PF01323:DSBA-like thioredoxin domain;PF00071:Ras family;PF01926:50S ribosome-binding GTPase;PF00005:ABC transporter;PF00735:Septin	GO:0007264	small GTPase mediated signal transduction	--	--	GO:0003677//GO:0003924//GO:0000166//GO:0005524//GO:0015035//GO:0005525//GO:0016887	DNA binding//GTPase activity//nucleotide binding//ATP binding//protein disulfide oxidoreductase activity//GTP binding//ATPase activity	At5g39960	Mitochondrial GTPase
transcript_HQ_TX_pn_transcript24659/f3p0/2513	2513	79	0	XP_001779439.1	predicted protein [Physcomitrella patens]	82.538	0	XM_001779387.1	Physcomitrella patens subsp. patens predicted protein (PHYPADRAFT_147342) mRNA, complete cds	K16900	TPC1, CCH1	two pore calcium channel protein, plant	-	-	49	9.3e-190	sp|Q75VR0|TPC1B_TOBAC	Two pore calcium channel protein 1B OS=Nicotiana tabacum GN=TPC1B PE=2 SV=1	PF00520:Ion transport protein;PF13833:EF-hand domain pair;PF13405:EF-hand domain;PF00036:EF hand;PF01348:Type II intron maturase;PF13499:EF-hand domain pair	GO:0006397//GO:0006811//GO:0055085	mRNA processing//ion transport//transmembrane transport	GO:0016020	membrane	GO:0005509//GO:0005216	calcium ion binding//ion channel activity	At4g03560	Voltage-gated Ca2+ channels, alpha1 subunits
transcript_HQ_TX_pn_transcript49922/f2p0/1832	1832	62.5	2.3e-139	XP_001757130.1	predicted protein [Physcomitrella patens]	80.277	1.71e-175	XM_001757078.1	Physcomitrella patens subsp. patens predicted protein (PHYPADRAFT_177819) mRNA, complete cds	-	-	-	-	-	--	--	--	--	PF00071:Ras family;PF01926:50S ribosome-binding GTPase;PF08477:Ras of Complex, Roc, domain of DAPkinase	GO:0007264	small GTPase mediated signal transduction	--	--	GO:0005525	GTP binding	At5g65960	Uncharacterized conserved protein
transcript_HQ_TX_pn_transcript17816/f7p0/2757	2757	55.4	1.7e-202	XP_001751236.1	predicted protein [Physcomitrella patens]	--	--	--	--	-	-	-	-	-	47.9	8.2e-06	sp|Q9V8P9|TOPRS_DROME	E3 ubiquitin-protein ligase Topors OS=Drosophila melanogaster GN=Topors PE=1 SV=1	PF00628:PHD-finger;PF05083:LST-1 protein;PF12678:RING-H2 zinc finger domain;PF03854:P-11 zinc finger;PF12861:Anaphase-promoting complex subunit 11 RING-H2 finger;PF13639:Ring finger domain;PF00097:Zinc finger, C3HC4 type (RING finger)	GO:0006955//GO:0000902	immune response//cell morphogenesis	GO:0005680//GO:0016020	anaphase-promoting complex//membrane	GO:0004842//GO:0003723//GO:0005515//GO:0046872//GO:0008270	ubiquitin-protein transferase activity//RNA binding//protein binding//metal ion binding//zinc ion binding	At3g05670	Topoisomerase I-binding arginine-serine-rich protein
transcript_HQ_TX_pn_transcript36335/f4p0/2185	2185	79.9	7.3e-177	XP_001754047.1	predicted protein [Physcomitrella patens]	--	--	--	--	K01102	PDP	pyruvate dehydrogenase phosphatase	3.1.3.43	-	58.5	5.1e-120	sp|Q9SD12|P2C46_ARATH	Probable protein phosphatase 2C 46 OS=Arabidopsis thaliana GN=At3g51370 PE=2 SV=1	PF00481:Protein phosphatase 2C;PF07228:Stage II sporulation protein E (SpoIIE)	--	--	--	--	GO:0003824	catalytic activity	At3g51370	Protein phosphatase 2C/pyruvate dehydrogenase (lipoamide) phosphatase
transcript_HQ_TX_pn_transcript51296/f3p0/1843	1843	25.1	9.3e-16	OAY38335.1	hypothetical protein MANES_10G006400 [Manihot esculenta]	--	--	--	--	K10523	SPOP	speckle-type POZ protein	-	ko04340; Environmental Information Processing; Signal transduction; Hedgehog signaling pathway | ko04341; Environmental Information Processing; Signal transduction; Hedgehog signaling pathway - fly	26	6.7e-12	sp|Q9LYL9|Y3623_ARATH	BTB/POZ domain-containing protein At3g56230 OS=Arabidopsis thaliana GN=At3g56230 PE=2 SV=1	PF00651:BTB/POZ domain;PF00412:LIM domain;PF02183:Homeobox associated leucine zipper	GO:0006355	regulation of transcription, DNA-templated	--	--	GO:0008270//GO:0005515//GO:0003700//GO:0043565	zinc ion binding//protein binding//transcription factor activity, sequence-specific DNA binding//sequence-specific DNA binding	At3g56230	Speckle-type POZ protein SPOP and related proteins with TRAF, MATH and BTB/POZ domains
transcript_HQ_TX_pn_transcript61474/f6p0/1544	1544	41.8	6.8e-12	XP_001763714.1	predicted protein [Physcomitrella patens]	--	--	--	--	--	--	--	--	--	--	--	--	--	--	--	--	--	--	--	--	--	--
transcript_HQ_TX_pn_transcript40476/f57p0/2059	2059	67.4	5.4e-190	XP_001766981.1	predicted protein [Physcomitrella patens]	74.687	2.84e-79	XM_001766929.1	Physcomitrella patens subsp. patens predicted protein (PHYPADRAFT_131577) mRNA, complete cds	K15378	SLC45A1_2_4	solute carrier family 45, member 1/2/4	-	-	48.6	4.1e-127	sp|Q9FE59|SUC4_ARATH	Sucrose transport protein SUC4 OS=Arabidopsis thaliana GN=SUC4 PE=1 SV=2	--	--	--	--	--	--	--	At1g09960	Sucrose transporter and related proteins
transcript_HQ_TX_pn_transcript72944/f5p0/1010	1010	60.4	2.4e-18	XP_001778082.1	predicted protein [Physcomitrella patens]	--	--	--	--	--	--	--	--	--	--	--	--	--	--	--	--	--	--	--	--	--	--
transcript_HQ_TX_pn_transcript8496/f2p0/3333	3333	--	--	--	--	--	--	--	--	--	--	--	--	--	--	--	--	--	--	--	--	--	--	--	--	--	--
transcript_HQ_TX_pn_transcript26344/f2p0/2486	2484	64.5	1.5e-210	XP_001771110.1	predicted protein [Physcomitrella patens]	--	--	--	--	K14638	SLC15A3_4, PHT	solute carrier family 15 (peptide/histidine transporter), member 3/4	-	-	48.9	7.9e-149	sp|Q9M390|PTR1_ARATH	Protein NRT1/ PTR FAMILY 8.1 OS=Arabidopsis thaliana GN=NPF8.1 PE=1 SV=1	PF00854:POT family;PF00083:Sugar (and other) transporter;PF03092:BT1 family;PF07690:Major Facilitator Superfamily	GO:0006810//GO:0055085	transport//transmembrane transport	GO:0016021//GO:0016020	integral component of membrane//membrane	GO:0005215//GO:0022857	transporter activity//transmembrane transporter activity	At3g54140	H+/oligopeptide symporter
transcript_HQ_TX_pn_transcript68334/f7p0/1282	1282	84.6	2.5e-129	XP_001780483.1	predicted protein [Physcomitrella patens]	84.709	0	XM_001780431.1	Physcomitrella patens subsp. patens predicted protein (PHYPADRAFT_224194) mRNA, complete cds	-	-	-	-	-	31.1	6.1e-20	sp|O94270|ERD2_SCHPO	ER lumen protein-retaining receptor OS=Schizosaccharomyces pombe (strain 972 / ATCC 24843) GN=erd2 PE=3 SV=1	PF00810:ER lumen protein retaining receptor	GO:0006621	protein retention in ER lumen	GO:0016021	integral component of membrane	GO:0046923	ER retention sequence binding	At1g19970	ER lumen protein retaining receptor
transcript_HQ_TX_pn_transcript12570/f2p0/3062	3062	81.9	8.3e-78	XP_001753461.1	predicted protein [Physcomitrella patens]	--	--	--	--	K03100	lepB, TPP	signal peptidase I	3.4.21.89	ko03060; Genetic Information Processing; Folding, sorting and degradation; Protein export | ko02024; Cellular Processes; Cellular community - prokaryotes; Quorum sensing	61.2	1.8e-54	sp|Q8H0W1|PLSP1_ARATH	Chloroplast processing peptidase OS=Arabidopsis thaliana GN=PLSP1 PE=2 SV=2	--	--	--	--	--	--	--	At1g06870	Mitochondrial inner membrane protease, subunit IMP1
transcript_HQ_TX_pn_transcript74678/f6p0/816	816	83.1	7.3e-82	XP_001783824.1	predicted protein [Physcomitrella patens]	--	--	--	--	K10525	AOC	allene oxide cyclase	5.3.99.6	ko00592; Metabolism; Lipid metabolism; alpha-Linolenic acid metabolism	60.2	7.9e-58	sp|A2XID3|AOC_ORYSI	Allene oxide cyclase, chloroplastic OS=Oryza sativa subsp. indica GN=AOC PE=2 SV=1	PF06351:Allene oxide cyclase	--	--	GO:0009507	chloroplast	GO:0016853	isomerase activity	--	--
transcript_HQ_TX_pn_transcript44018/f2p0/2019	2019	85.2	8.8e-177	XP_001768326.1	predicted protein [Physcomitrella patens]	85.97	0	XM_001771102.1	Physcomitrella patens subsp. patens predicted protein (PHYPADRAFT_231551) mRNA, complete cds	K00162	PDHB, pdhB	pyruvate dehydrogenase E1 component beta subunit	1.2.4.1	ko01200; Metabolism; Global and overview maps; Carbon metabolism | ko00010; Metabolism; Carbohydrate metabolism; Glycolysis / Gluconeogenesis | ko00020; Metabolism; Carbohydrate metabolism; Citrate cycle (TCA cycle) | ko00620; Metabolism; Carbohydrate metabolism; Pyruvate metabolism | ko04066; Environmental Information Processing; Signal transduction; HIF-1 signaling pathway | ko04922; Organismal…	76.7	2.5e-153	sp|Q2QM55|ODPB3_ORYSJ	Pyruvate dehydrogenase E1 component subunit beta-3, chloroplastic OS=Oryza sativa subsp. japonica GN=Os12g0616900 PE=2 SV=1	--	--	--	--	--	--	--	At1g30120	Pyruvate dehydrogenase E1, beta subunit
transcript_HQ_TX_pn_transcript35458/f2p0/2226	2226	68.4	3.9e-154	XP_001768983.1	predicted protein [Physcomitrella patens]	75.542	5.48e-32	XM_008808376.2	PREDICTED: Phoenix dactylifera cell number regulator 13-like (LOC103719235), mRNA	-	-	-	-	-	40.4	4.4e-74	sp|Q8L7E9|MCAC1_ARATH	Protein MID1-COMPLEMENTING ACTIVITY 1 OS=Arabidopsis thaliana GN=MCA1 PE=1 SV=1	--	--	--	--	--	--	--	--	--
transcript_HQ_TX_pn_transcript51955/f2p0/1828	1828	49.3	1.4e-93	XP_001756171.1	predicted protein [Physcomitrella patens]	--	--	--	--	-	-	-	-	-	--	--	--	--	PF01543:Hepatitis C virus capsid protein;PF00643:B-box zinc finger	--	--	GO:0019028//GO:0005622	viral capsid//intracellular	GO:0008270//GO:0005198	zinc ion binding//structural molecule activity	--	--
transcript_HQ_TX_pn_transcript913/f3p0/4765	4765	44.1	1.5e-291	OAE19833.1	hypothetical protein AXG93_291s1140 [Marchantia polymorpha subsp. polymorpha]	80.288	0	XM_001773989.1	Physcomitrella patens subsp. patens predicted protein (PHYPADRAFT_140875) mRNA, partial cds	-	-	-	-	-	45.6	7.8e-121	sp|Q84R11|CRSH_ARATH	Probable GTP diphosphokinase CRSH, chloroplastic OS=Arabidopsis thaliana GN=CRSH PE=2 SV=1	PF00515:Tetratricopeptide repeat;PF13176:Tetratricopeptide repeat;PF10591:Secreted protein acidic and rich in cysteine Ca binding region;PF13833:EF-hand domain pair;PF13371:Tetratricopeptide repeat;PF13405:EF-hand domain;PF13181:Tetratricopeptide repeat;PF13174:Tetratricopeptide repeat;PF00036:EF hand;PF02184:HAT (Half-A-TPR) repeat;PF13499:EF-hand domain pair;PF04607:Region found in RelA / SpoT …	GO:0007165//GO:0015969//GO:0006396	signal transduction//guanosine tetraphosphate metabolic process//RNA processing	GO:0005578	proteinaceous extracellular matrix	GO:0005515//GO:0005509	protein binding//calcium ion binding	At3g17470	Predicted guanosine polyphosphate pyrophosphohydrolase/synthase
transcript_HQ_TX_pn_transcript57695/f2p0/1681	1681	49.3	1.3e-93	XP_001756171.1	predicted protein [Physcomitrella patens]	--	--	--	--	-	-	-	-	-	--	--	--	--	PF01543:Hepatitis C virus capsid protein;PF00643:B-box zinc finger	--	--	GO:0019028//GO:0005622	viral capsid//intracellular	GO:0008270//GO:0005198	zinc ion binding//structural molecule activity	--	--
transcript_HQ_TX_pn_transcript63039/f3p0/1502	1502	92.8	1.5e-85	XP_001753766.1	early light-induced protein 1 [Physcomitrella patens]	86.762	3.1e-152	XM_001783553.1	Physcomitrella patens subsp. patens early light-induced protein 5 (ELIP5) mRNA, complete cds	-	-	-	-	-	40	4.9e-21	sp|Q01931|DS22_CRAPL	Desiccation stress protein DSP-22, chloroplastic OS=Craterostigma plantagineum GN=DSP-22 PE=2 SV=1	--	--	--	--	--	--	--	--	--
transcript_HQ_TX_pn_transcript48820/f2p0/1902	1902	36.8	6.6e-49	APB88777.1	terpene synthase 3 [Anomodon rostratus]	--	--	--	--	--	--	--	--	--	--	--	--	--	--	--	--	--	--	--	--	--	--
transcript_HQ_TX_pn_transcript49163/f2p0/1860	1860	34.1	4.2e-08	XP_002448770.1	hypothetical protein SORBIDRAFT_06g032870 [Sorghum bicolor]	--	--	--	--	-	-	-	-	-	33.1	2.2e-07	sp|P26307|VIV1_MAIZE	Regulatory protein viviparous-1 OS=Zea mays GN=VP1 PE=2 SV=1	--	--	--	--	--	--	--	--	--
transcript_HQ_TX_pn_transcript34653/f7p0/2242	2242	85.4	5.6e-241	XP_001765767.1	predicted protein [Physcomitrella patens]	85.23	0	XM_001765715.1	Physcomitrella patens subsp. patens predicted protein (PHYPADRAFT_57834) mRNA, complete cds	-	-	-	-	-	38	1.1e-08	sp|Q8W5R5|KN7D_ARATH	Kinesin-like protein KIN-7D, mitochondrial OS=Arabidopsis thaliana GN=KIN7D PE=2 SV=1	PF14634:zinc-RING finger domain	--	--	--	--	GO:0005515//GO:0008270	protein binding//zinc ion binding	--	--
transcript_HQ_TX_pn_transcript57919/f3p0/1668	1668	68.4	4e-151	XP_001781902.1	predicted protein [Physcomitrella patens]	--	--	--	--	-	-	-	-	-	26.7	1.2e-20	sp|Q9FZK1|FBX6_ARATH	F-box only protein 6 OS=Arabidopsis thaliana GN=FBX6 PE=2 SV=1	PF00646:F-box domain;PF01344:Kelch motif	--	--	--	--	GO:0005515	protein binding	--	--
transcript_HQ_TX_pn_transcript54134/f2p0/1776	1775	60.2	7.3e-26	XP_001770044.1	predicted protein [Physcomitrella patens]	--	--	--	--	-	-	-	-	-	--	--	--	--	--	--	--	--	--	--	--	--	--
transcript_HQ_TX_pn_transcript10065/f2p0/3220	3218	70.2	0	XP_001768589.1	predicted protein [Physcomitrella patens]	77.795	0	XM_001768537.1	Physcomitrella patens subsp. patens predicted protein (PHYPADRAFT_133553) mRNA, complete cds	-	-	-	-	-	33.6	7.7e-56	sp|Q7Z2K6|ERMP1_HUMAN	Endoplasmic reticulum metallopeptidase 1 OS=Homo sapiens GN=ERMP1 PE=1 SV=2	PF05450:Nicastrin;PF01546:Peptidase family M20/M25/M40	GO:0008152//GO:0016485	metabolic process//protein processing	GO:0016021	integral component of membrane	GO:0016787	hydrolase activity	At5g20660	Aminopeptidases of the M20 family
transcript_HQ_TX_pn_transcript16326/f3p0/2893	2893	54.7	1.2e-123	BAL46027.1	Dof transcription factor [Physcomitrella patens]	80.1	3.33e-30	XM_011088938.1	PREDICTED: Sesamum indicum cyclic dof factor 1 (LOC105168787), mRNA	-	-	-	-	-	68.8	1.8e-27	sp|Q93ZL5|CDF2_ARATH	Cyclic dof factor 2 OS=Arabidopsis thaliana GN=CDF2 PE=1 SV=2	PF02701:Dof domain, zinc finger	GO:0006355	regulation of transcription, DNA-templated	--	--	GO:0003677	DNA binding	--	--
transcript_HQ_TX_pn_transcript68072/f2p0/1306	1305	74.1	2.4e-58	XP_001768479.1	predicted protein [Physcomitrella patens]	--	--	--	--	K13448	CML	calcium-binding protein CML	-	ko04626; Organismal Systems; Environmental adaptation; Plant-pathogen interaction	47.6	4.7e-28	sp|Q8RZB5|CML10_ORYSJ	Probable calcium-binding protein CML10 OS=Oryza sativa subsp. japonica GN=CML10 PE=2 SV=1	PF13833:EF-hand domain pair;PF10591:Secreted protein acidic and rich in cysteine Ca binding region;PF12763:Cytoskeletal-regulatory complex EF hand;PF13202:EF hand;PF00036:EF hand;PF13405:EF-hand domain;PF13499:EF-hand domain pair	GO:0007165	signal transduction	GO:0005578	proteinaceous extracellular matrix	GO:0005509//GO:0005515	calcium ion binding//protein binding	At1g24620	Calmodulin and related proteins (EF-Hand superfamily)
transcript_HQ_TX_pn_transcript62584/f2p0/1529	1529	85.5	2.9e-124	XP_001784977.1	predicted protein [Physcomitrella patens]	84.667	0	XM_001784925.1	Physcomitrella patens subsp. patens predicted protein (PHYPADRAFT_173274) mRNA, complete cds	-	-	-	-	-	39.5	3.5e-38	sp|Q9XBR7|Y1337_ZYMMO	Putative quercetin 2,3-dioxygenase ZMO1337 OS=Zymomonas mobilis subsp. mobilis (strain ATCC 31821 / ZM4 / CP4) GN=ZMO1337 PE=3 SV=1	--	--	--	--	--	--	--	--	--
transcript_HQ_TX_pn_transcript68846/f2p0/1262	1268	73.1	1.2e-83	XP_001772796.1	predicted protein [Physcomitrella patens]	--	--	--	--	-	-	-	-	-	34.9	6.4e-22	sp|Q9LZX1|LOR15_ARATH	Protein LURP-one-related 15 OS=Arabidopsis thaliana GN=At5g01750 PE=1 SV=1	--	--	--	--	--	--	--	--	--
transcript_HQ_TX_pn_transcript49425/f3p0/1883	1883	89.4	4.7e-249	XP_001781039.1	predicted protein [Physcomitrella patens]	85.787	0	XM_001780987.1	Physcomitrella patens subsp. patens predicted protein (PHYPADRAFT_171465) mRNA, complete cds	K00927	PGK, pgk	phosphoglycerate kinase	2.7.2.3	ko01200; Metabolism; Global and overview maps; Carbon metabolism | ko01230; Metabolism; Global and overview maps; Biosynthesis of amino acids | ko00010; Metabolism; Carbohydrate metabolism; Glycolysis / Gluconeogenesis | ko00710; Metabolism; Energy metabolism; Carbon fixation in photosynthetic organisms	32.6	2.1e-37	sp|P62414|PGK_LEPIC	Phosphoglycerate kinase OS=Leptospira interrogans serogroup Icterohaemorrhagiae serovar copenhageni (strain Fiocruz L1-130) GN=pgk PE=3 SV=1	PF00162:Phosphoglycerate kinase	GO:0006096	glycolytic process	--	--	GO:0004618	phosphoglycerate kinase activity	At1g79550	3-phosphoglycerate kinase
transcript_HQ_TX_pn_transcript56581/f3p0/1711	1711	56.8	3.4e-105	XP_001753052.1	predicted protein [Physcomitrella patens]	--	--	--	--	-	-	-	-	-	--	--	--	--	PF04111:Autophagy protein Apg6	GO:0006914	autophagy	--	--	--	--	--	--
transcript_HQ_TX_pn_transcript63940/f6p0/1478	1478	50	3.4e-29	XP_001779618.1	predicted protein [Physcomitrella patens]	--	--	--	--	K12828	SF3B1, SAP155	splicing factor 3B subunit 1	-	ko03040; Genetic Information Processing; Transcription; Spliceosome	76	1.5e-14	sp|O57683|SF3B1_XENLA	Splicing factor 3B subunit 1 OS=Xenopus laevis GN=sf3b1 PE=2 SV=1	PF00067:Cytochrome P450	GO:0055114	oxidation-reduction process	--	--	GO:0005506//GO:0016705//GO:0020037	iron ion binding//oxidoreductase activity, acting on paired donors, with incorporation or reduction of molecular oxygen//heme binding	At5g64270	Splicing factor 3b, subunit 1
transcript_HQ_TX_pn_transcript28453/f2p0/2420	2420	79	3.3e-114	XP_001757346.1	predicted protein [Physcomitrella patens]	78.236	5.07e-147	XM_001757294.1	Physcomitrella patens subsp. patens predicted protein (PHYPADRAFT_70176) mRNA, complete cds	-	-	-	-	-	63.9	3.3e-43	sp|Q94A57|PHL2_ARATH	Protein PHR1-LIKE 2 OS=Arabidopsis thaliana GN=PHL2 PE=1 SV=1	PF15681:Lymphocyte activation family X	GO:0051249//GO:0006955	regulation of lymphocyte activation//immune response	--	--	--	--	--	--
transcript_HQ_TX_pn_transcript34082/f2p0/2262	2262	52.7	5.8e-153	AEW91475.1	9-cis-epoxycarotenoid dioxygenase [Taxus wallichiana var. chinensis]	--	--	--	--	K09840	NCED	9-cis-epoxycarotenoid dioxygenase	1.13.11.51	ko00906; Metabolism; Metabolism of terpenoids and polyketides; Carotenoid biosynthesis	49.2	1.8e-136	sp|Q9M9F5|NCED9_ARATH	9-cis-epoxycarotenoid dioxygenase NCED9, chloroplastic OS=Arabidopsis thaliana GN=NCED9 PE=2 SV=1	PF03055:Retinal pigment epithelial membrane protein	GO:0055114	oxidation-reduction process	--	--	GO:0016702	oxidoreductase activity, acting on single donors with incorporation of molecular oxygen, incorporation of two atoms of oxygen	At1g78390	Beta, beta-carotene 15,15'-dioxygenase and related enzymes
transcript_HQ_TX_pn_transcript7540/f2p0/3440	3440	74.1	0	XP_001759590.1	predicted protein [Physcomitrella patens]	83.498	0	XM_001756451.1	Physcomitrella patens subsp. patens predicted protein (PHYPADRAFT_117969) mRNA, complete cds	-	-	-	-	-	46.9	1.1e-198	sp|O23052|Y1515_ARATH	Uncharacterized TPR repeat-containing protein At1g05150 OS=Arabidopsis thaliana GN=At1g05150 PE=1 SV=1	PF13181:Tetratricopeptide repeat;PF13174:Tetratricopeptide repeat;PF13405:EF-hand domain;PF00036:EF hand;PF13176:Tetratricopeptide repeat;PF13833:EF-hand domain pair;PF13371:Tetratricopeptide repeat;PF00515:Tetratricopeptide repeat;PF04216:Protein involved in formate dehydrogenase formation;PF13202:EF hand;PF13499:EF-hand domain pair;PF13374:Tetratricopeptide repeat;PF13414:TPR repeat	--	--	GO:0005737	cytoplasm	GO:0005515//GO:0005509	protein binding//calcium ion binding	At1g05150	FOG: TPR repeat
transcript_HQ_TX_pn_transcript32524/f9p0/2278	2278	52.3	6.2e-155	OAE33214.1	hypothetical protein AXG93_3105s1210 [Marchantia polymorpha subsp. polymorpha]	--	--	--	--	K13071	PAO, ACD1	pheophorbide a oxygenase	1.14.15.17	ko00860; Metabolism; Metabolism of cofactors and vitamins; Porphyrin and chlorophyll metabolism	37.7	4.3e-93	sp|Q9FYC2|PAO_ARATH	Pheophorbide a oxygenase, chloroplastic OS=Arabidopsis thaliana GN=PAO PE=1 SV=1	PF00355:Rieske [2Fe-2S] domain;PF08417:Pheophorbide a oxygenase	GO:0055114	oxidation-reduction process	--	--	GO:0016491//GO:0051537//GO:0010277	oxidoreductase activity//2 iron, 2 sulfur cluster binding//chlorophyllide a oxygenase [overall] activity	--	--
transcript_HQ_TX_pn_transcript19360/f2p0/2669	2669	82.4	0	XP_001773477.1	protein arginine N-methyltransferase [Physcomitrella patens]	78.761	0	XM_001773425.1	Physcomitrella patens subsp. patens protein arginine N-methyltransferase (PRMT1506) mRNA, complete cds	K02516	PRMT5, HSL7	type II protein arginine methyltransferase	2.1.1.320	ko03013; Genetic Information Processing; Translation; RNA transport | ko04011; Environmental Information Processing; Signal transduction; MAPK signaling pathway - yeast | ko04111; Cellular Processes; Cell growth and death; Cell cycle - yeast	64.6	1.5e-251	sp|Q6YXZ7|ANM5_ORYSJ	Protein arginine N-methyltransferase 5 OS=Oryza sativa subsp. japonica GN=PRMT5 PE=2 SV=1	PF08241:Methyltransferase domain;PF05185:PRMT5 arginine-N-methyltransferase	GO:0008152//GO:0006479	metabolic process//protein methylation	--	--	GO:0008168	methyltransferase activity	At4g31120	Protein kinase inhibitor
transcript_HQ_TX_pn_transcript55162/f2p0/1749	1751	40.6	1e-43	OAE31669.1	hypothetical protein AXG93_3384s1430 [Marchantia polymorpha subsp. polymorpha]	--	--	--	--	-	-	-	-	-	23.6	7.3e-08	sp|Q9C7A2|ITN1_ARATH	Ankyrin repeat-containing protein ITN1 OS=Arabidopsis thaliana GN=ITN1 PE=1 SV=1	PF00023:Ankyrin repeat;PF01925:Sulfite exporter TauE/SafE;PF13606:Ankyrin repeat	--	--	GO:0016021	integral component of membrane	GO:0005515	protein binding	At3g12360	FOG: Ankyrin repeat
transcript_HQ_TX_pn_transcript56173/f3p0/1719	1719	85.2	6.5e-189	XP_001760342.1	predicted protein [Physcomitrella patens]	87.532	0	XM_001760290.1	Physcomitrella patens subsp. patens predicted protein (PHYPADRAFT_105605) mRNA, complete cds	K17908	WIPI, ATG18	autophagy-related protein 18	-	ko04140; Cellular Processes; Transport and catabolism; Autophagy - animal | ko04138; Cellular Processes; Transport and catabolism; Autophagy - yeast	48.8	1.6e-87	sp|Q8H1Q8|AT18B_ARATH	Autophagy-related protein 18b OS=Arabidopsis thaliana GN=ATG18B PE=2 SV=2	PF00400:WD domain, G-beta repeat	--	--	--	--	GO:0005515	protein binding	At4g30510	Uncharacterized conserved protein, contains WD40 repeats
transcript_HQ_TX_pn_transcript63891/f11p0/1420	1420	82.8	3.9e-131	XP_001781702.1	predicted protein [Physcomitrella patens]	80.595	6.07e-179	XM_001781650.1	Physcomitrella patens subsp. patens predicted protein (PHYPADRAFT_225082) mRNA, partial cds	K08235	E2.4.1.207	xyloglucan:xyloglucosyl transferase	2.4.1.207	-	54.8	6.2e-82	sp|Q9XIW1|XTH5_ARATH	Probable xyloglucan endotransglucosylase/hydrolase protein 5 OS=Arabidopsis thaliana GN=XTH5 PE=2 SV=1	PF06955:Xyloglucan endo-transglycosylase (XET) C-terminus;PF00722:Glycosyl hydrolases family 16	GO:0005975//GO:0006073	carbohydrate metabolic process//cellular glucan metabolic process	GO:0005618//GO:0048046	cell wall//apoplast	GO:0004553//GO:0016762	hydrolase activity, hydrolyzing O-glycosyl compounds//xyloglucan:xyloglucosyl transferase activity	--	--
transcript_HQ_TX_pn_transcript62859/f2p0/1517	1518	70.7	7.6e-133	XP_001784029.1	predicted protein [Physcomitrella patens]	--	--	--	--	-	-	-	-	-	--	--	--	--	PF01007:Inward rectifier potassium channel	GO:0006813	potassium ion transport	GO:0016021	integral component of membrane	GO:0005242	inward rectifier potassium channel activity	--	--
transcript_HQ_TX_pn_transcript70226/f2p0/1191	1191	89.2	3.9e-124	XP_001754837.1	predicted protein [Physcomitrella patens]	84.232	0	XM_001754785.1	Physcomitrella patens subsp. patens predicted protein (PHYPADRAFT_67702) mRNA, complete cds	K01061	E3.1.1.45	carboxymethylenebutenolidase	3.1.1.45	ko00364; Metabolism; Xenobiotics biodegradation and metabolism; Fluorobenzoate degradation | ko00361; Metabolism; Xenobiotics biodegradation and metabolism; Chlorocyclohexane and chlorobenzene degradation | ko00623; Metabolism; Xenobiotics biodegradation and metabolism; Toluene degradation	34	2.5e-20	sp|Q7DFU6|YGHX_ECOLI	Putative uncharacterized protein YghX OS=Escherichia coli (strain K12) GN=yghX PE=5 SV=3	PF01738:Dienelactone hydrolase family;PF00326:Prolyl oligopeptidase family;PF07859:alpha/beta hydrolase fold;PF02230:Phospholipase/Carboxylesterase	GO:0006508//GO:0008152	proteolysis//metabolic process	--	--	GO:0008236//GO:0016787	serine-type peptidase activity//hydrolase activity	At2g32520	Predicted hydrolase related to dienelactone hydrolase
transcript_HQ_TX_pn_transcript47716/f2p0/1929	1929	39.7	5.9e-13	XP_001766123.1	predicted protein [Physcomitrella patens]	--	--	--	--	--	--	--	--	--	--	--	--	--	--	--	--	--	--	--	--	--	--
transcript_HQ_TX_pn_transcript49467/f2p0/1887	1887	58.2	1.6e-47	OAE28548.1	hypothetical protein AXG93_2175s1310 [Marchantia polymorpha subsp. polymorpha]	--	--	--	--	K15304	RANBP3	Ran-binding protein 3	-	ko05166; Human Diseases; Infectious diseases: Viral; HTLV-I infection	54.8	7.3e-38	sp|Q9LW88|NU50B_ARATH	Nuclear pore complex protein NUP50B OS=Arabidopsis thaliana GN=NUP50B PE=1 SV=1	PF08911:NUP50 (Nucleoporin 50 kDa);PF00638:RanBP1 domain	GO:0046907	intracellular transport	GO:0005643	nuclear pore	--	--	At3g15970	Ran-binding protein RANBP1 and related RanBD domain proteins
transcript_HQ_TX_pn_transcript22640/f2p0/2565	2565	49.4	4.8e-63	OAE25015.1	hypothetical protein AXG93_523s1200 [Marchantia polymorpha subsp. polymorpha]	--	--	--	--	-	-	-	-	-	38.2	1.5e-46	sp|Q9LHN9|IQM2_ARATH	IQ domain-containing protein IQM2 OS=Arabidopsis thaliana GN=IQM2 PE=2 SV=1	--	--	--	--	--	--	--	--	--
transcript_HQ_TX_pn_transcript44976/f43p0/1934	1931	83.3	1.3e-177	XP_001781358.1	predicted protein [Physcomitrella patens]	80.257	0	XM_001764839.1	Physcomitrella patens subsp. patens predicted protein (PHYPADRAFT_233086) mRNA, complete cds	-	-	-	-	-	22.9	4.5e-19	sp|Q9LFV5|FK111_ARATH	F-box/kelch-repeat protein At5g15710 OS=Arabidopsis thaliana GN=At5g15710 PE=2 SV=1	PF07655:Secretin N-terminal domain;PF01344:Kelch motif;PF00646:F-box domain;PF12937:F-box-like	GO:0009297	pilus assembly	GO:0019867	outer membrane	GO:0005515	protein binding	--	--
transcript_HQ_TX_pn_transcript68775/f3p0/1274	1274	67.5	2.2e-101	XP_001767494.1	predicted protein [Physcomitrella patens]	76.431	2.81e-102	XM_001767442.1	Physcomitrella patens subsp. patens predicted protein (PHYPADRAFT_165701) mRNA, complete cds	-	-	-	-	-	--	--	--	--	--	--	--	--	--	--	--	--	--
transcript_HQ_TX_pn_transcript51140/f8p0/1826	1826	62.4	6.8e-120	XP_001771301.1	predicted protein [Physcomitrella patens]	--	--	--	--	-	-	-	-	-	33.2	2.6e-16	sp|P53118|ROG1_YEAST	Putative lipase ROG1 OS=Saccharomyces cerevisiae (strain ATCC 204508 / S288c) GN=ROG1 PE=1 SV=1	PF01674:Lipase (class 2);PF07819:PGAP1-like protein;PF01764:Lipase (class 3)	GO:0006629	lipid metabolic process	--	--	GO:0016788//GO:0016787	hydrolase activity, acting on ester bonds//hydrolase activity	At5g51180	Predicted alpha/beta hydrolase
transcript_HQ_TX_pn_transcript22685/f3p0/2608	2608	56.1	2.3e-177	XP_001763099.1	predicted protein [Physcomitrella patens]	75.914	0	XM_001763047.1	Physcomitrella patens subsp. patens predicted protein (PHYPADRAFT_163695) mRNA, complete cds	-	-	-	-	-	29.3	1.1e-23	sp|Q9SCK0|AT13A_ARATH	Autophagy-related protein 13a OS=Arabidopsis thaliana GN=ATG13A PE=1 SV=1	PF10033:Autophagy-related protein 13	GO:0006914	autophagy	GO:1990316	ATG1/ULK1 kinase complex	--	--	At3g49590	Phosphoprotein involved in cytoplasm to vacuole targeting and autophagy
transcript_HQ_TX_pn_transcript67774/f17p0/1288	1288	40.3	2.9e-40	XP_001765519.1	predicted protein [Physcomitrella patens]	--	--	--	--	-	-	-	-	-	--	--	--	--	--	--	--	--	--	--	--	--	--
transcript_HQ_TX_pn_transcript55616/f6p0/1731	1732	80.4	8.7e-133	XP_001756764.1	predicted protein [Physcomitrella patens]	80.565	0	XM_001756712.1	Physcomitrella patens subsp. patens predicted protein (PHYPADRAFT_118436) mRNA, complete cds	K04710	CERS	ceramide synthetase	2.3.1.24	ko00600; Metabolism; Lipid metabolism; Sphingolipid metabolism | ko04071; Environmental Information Processing; Signal transduction; Sphingolipid signaling pathway	60	4.5e-95	sp|Q8W4Y5|ASCL_SOLLC	ASC1-like protein OS=Solanum lycopersicum PE=2 SV=1	PF02537:CrcB-like protein, Camphor Resistance (CrcB);PF03798:TLC domain	--	--	GO:0016021	integral component of membrane	--	--	At3g25540	Protein transporter of the TRAM (translocating chain-associating membrane) superfamily
transcript_HQ_TX_pn_transcript46340/f6p0/1997	1997	68.6	1.3e-119	XP_001764685.1	predicted protein [Physcomitrella patens]	--	--	--	--	-	-	-	-	-	46.7	1.8e-71	sp|Q9SGA2|GDPD1_ARATH	Glycerophosphodiester phosphodiesterase GDPD1, chloroplastic OS=Arabidopsis thaliana GN=GDPD1 PE=1 SV=1	PF03009:Glycerophosphoryl diester phosphodiesterase family	GO:0006629	lipid metabolic process	--	--	GO:0008081	phosphoric diester hydrolase activity	At3g02040	Predicted starch-binding protein
transcript_HQ_TX_pn_transcript10074/f2p0/3229	3229	73.4	8.5e-190	XP_001757336.1	predicted protein [Physcomitrella patens]	80.984	0	XM_001754114.1	Physcomitrella patens subsp. patens predicted protein (PHYPADRAFT_114940) mRNA, partial cds	K01099	INPP5B_F	inositol polyphosphate 5-phosphatase INPP5B/F	3.1.3.36	ko00562; Metabolism; Carbohydrate metabolism; Inositol phosphate metabolism | ko04070; Environmental Information Processing; Signal transduction; Phosphatidylinositol signaling system	43.9	3.3e-91	sp|Q66GQ6|IP5P5_ARATH	Type I inositol polyphosphate 5-phosphatase 5 OS=Arabidopsis thaliana GN=IP5P5 PE=2 SV=1	--	--	--	--	--	--	--	At5g65090	Inositol polyphosphate 5-phosphatase and related proteins
transcript_HQ_TX_pn_transcript31506/f4p0/2332	2332	36.5	2.7e-44	XP_001765732.1	predicted protein [Physcomitrella patens]	--	--	--	--	-	-	-	-	-	30.3	4.5e-21	sp|P25848|PHY1_CERPU	Light-sensor Protein kinase OS=Ceratodon purpureus GN=PHY1 PE=3 SV=3	PF07714:Protein tyrosine kinase;PF00069:Protein kinase domain;PF07714:Protein tyrosine kinase;PF00069:Protein kinase domain	GO:0006468//GO:0006468	protein phosphorylation//protein phosphorylation	--	--	GO:0004672//GO:0005524//GO:0005524//GO:0004672	protein kinase activity//ATP binding//ATP binding//protein kinase activity	At4g35780	Tyrosine kinase specific for activated (GTP-bound) p21cdc42Hs
transcript_HQ_TX_pn_transcript21998/f5p0/2633	2633	66.7	4.4e-104	ADF28535.1	cinnamate 4-hydroxylase [Physcomitrella patens]	--	--	--	--	K00487	CYP73A	trans-cinnamate 4-monooxygenase	1.14.13.11	ko01220; Metabolism; Global and overview maps; Degradation of aromatic compounds | ko00360; Metabolism; Amino acid metabolism; Phenylalanine metabolism | ko00130; Metabolism; Metabolism of cofactors and vitamins; Ubiquinone and other terpenoid-quinone biosynthesis | ko00940; Metabolism; Biosynthesis of other secondary metabolites; Phenylpropanoid biosynthesis | ko00945; Metabolism; Biosynthesis o…	63.2	3.4e-94	sp|Q43054|TCMO_POPKI	Trans-cinnamate 4-monooxygenase OS=Populus kitakamiensis GN=CYP73A16 PE=2 SV=1	PF00067:Cytochrome P450	GO:0055114	oxidation-reduction process	--	--	GO:0005506//GO:0016705//GO:0020037	iron ion binding//oxidoreductase activity, acting on paired donors, with incorporation or reduction of molecular oxygen//heme binding	At2g30490	Cytochrome P450 CYP2 subfamily
transcript_HQ_TX_pn_transcript63263/f2p0/1504	1504	49.7	1.3e-97	XP_001761019.1	predicted protein [Physcomitrella patens]	--	--	--	--	-	-	-	-	-	38.3	1.4e-60	sp|O80449|DIOX4_ARATH	Probable 2-oxoglutarate-dependent dioxygenase ANS OS=Arabidopsis thaliana GN=ANS PE=2 SV=1	PF03171:2OG-Fe(II) oxygenase superfamily	GO:0055114	oxidation-reduction process	--	--	GO:0016491	oxidoreductase activity	At2g38240	Iron/ascorbate family oxidoreductases
transcript_HQ_TX_pn_transcript53500/f2p0/1777	1776	36.8	6.1e-49	APB88777.1	terpene synthase 3 [Anomodon rostratus]	--	--	--	--	--	--	--	--	--	--	--	--	--	--	--	--	--	--	--	--	--	--
transcript_HQ_TX_pn_transcript39028/f4p0/2102	2102	84.4	4.8e-202	XP_001784476.1	predicted protein [Physcomitrella patens]	84.071	0	XM_001784424.1	Physcomitrella patens subsp. patens predicted protein (PHYPADRAFT_154003) mRNA, complete cds	K01892	HARS, hisS	histidyl-tRNA synthetase	6.1.1.21	ko00970; Genetic Information Processing; Translation; Aminoacyl-tRNA biosynthesis	59.7	3.1e-138	sp|O82413|SYHM_ARATH	Histidine--tRNA ligase, chloroplastic/mitochondrial OS=Arabidopsis thaliana GN=At3g46100 PE=2 SV=1	PF01409:tRNA synthetases class II core domain (F);PF00587:tRNA synthetase class II core domain (G, H, P, S and T)	GO:0006418//GO:0043039	tRNA aminoacylation for protein translation//tRNA aminoacylation	GO:0005737	cytoplasm	GO:0000166//GO:0004812//GO:0000049//GO:0005524	nucleotide binding//aminoacyl-tRNA ligase activity//tRNA binding//ATP binding	At3g46100	Histidyl-tRNA synthetase
transcript_HQ_TX_pn_transcript8277/f11p0/3311	3311	24	1.6e-10	OAE24844.1	hypothetical protein AXG93_4242s1160 [Marchantia polymorpha subsp. polymorpha]	--	--	--	--	K20478	GOLGB1	golgin subfamily B member 1	-	-	25	1.7e-10	sp|Q3V6T2|GRDN_HUMAN	Girdin OS=Homo sapiens GN=CCDC88A PE=1 SV=2	PF00038:Intermediate filament protein;PF10473:Leucine-rich repeats of kinetochore protein Cenp-F/LEK1	--	--	GO:0005882	intermediate filament	GO:0070840//GO:0005198//GO:0042803//GO:0008134	dynein complex binding//structural molecule activity//protein homodimerization activity//transcription factor binding	--	--
transcript_HQ_TX_pn_transcript35005/f6p0/2225	2225	76.8	2.4e-228	XP_001773868.1	predicted protein [Physcomitrella patens]	78.672	0	XM_001773816.1	Physcomitrella patens subsp. patens predicted protein (PHYPADRAFT_140533) mRNA, complete cds	K00487	CYP73A	trans-cinnamate 4-monooxygenase	1.14.13.11	ko01220; Metabolism; Global and overview maps; Degradation of aromatic compounds | ko00360; Metabolism; Amino acid metabolism; Phenylalanine metabolism | ko00130; Metabolism; Metabolism of cofactors and vitamins; Ubiquinone and other terpenoid-quinone biosynthesis | ko00940; Metabolism; Biosynthesis of other secondary metabolites; Phenylpropanoid biosynthesis | ko00945; Metabolism; Biosynthesis o…	67.3	3.3e-199	sp|Q43054|TCMO_POPKI	Trans-cinnamate 4-monooxygenase OS=Populus kitakamiensis GN=CYP73A16 PE=2 SV=1	PF00067:Cytochrome P450	GO:0055114	oxidation-reduction process	--	--	GO:0005506//GO:0016705//GO:0020037	iron ion binding//oxidoreductase activity, acting on paired donors, with incorporation or reduction of molecular oxygen//heme binding	At2g30490	Cytochrome P450 CYP2 subfamily
transcript_HQ_TX_pn_transcript6719/f5p0/3511	3511	81.6	0	XP_001781021.1	predicted protein [Physcomitrella patens]	85.449	0	XM_001780969.1	Physcomitrella patens subsp. patens predicted protein (PHYPADRAFT_149218) mRNA, complete cds	-	-	-	-	-	71.1	0	sp|Q9SHS7|BSL3_ARATH	Serine/threonine-protein phosphatase BSL3 OS=Arabidopsis thaliana GN=BSL3 PE=1 SV=2	PF00149:Calcineurin-like phosphoesterase;PF01344:Kelch motif;PF07646:Kelch motif	--	--	--	--	GO:0005515//GO:0016787	protein binding//hydrolase activity	At1g08420_1	Kelch repeat-containing proteins
transcript_HQ_TX_pn_transcript48359/f2p0/1852	1852	62.5	1.5e-111	XP_001758535.1	predicted protein [Physcomitrella patens]	80.739	1.05e-162	XM_001758483.1	Physcomitrella patens subsp. patens predicted protein (PHYPADRAFT_161477) mRNA, complete cds	-	-	-	-	-	59.7	3.7e-26	sp|Q94A57|PHL2_ARATH	Protein PHR1-LIKE 2 OS=Arabidopsis thaliana GN=PHL2 PE=1 SV=1	PF11480:Colicin-E5 Imm protein	GO:0030153	bacteriocin immunity	--	--	--	--	--	--
transcript_HQ_TX_pn_transcript48034/f2p0/1928	1928	85.1	1.4e-155	XP_001774975.1	predicted protein [Physcomitrella patens]	85.509	0	XM_001774923.1	Physcomitrella patens subsp. patens predicted protein (PHYPADRAFT_219940) mRNA, complete cds	-	-	-	-	-	65.5	2.5e-118	sp|Q9LNK7|NIPA3_ARATH	Probable magnesium transporter NIPA3 OS=Arabidopsis thaliana GN=At1g34470 PE=2 SV=1	PF00892:EamA-like transporter family;PF05653:Magnesium transporter NIPA	GO:0015693	magnesium ion transport	GO:0016021//GO:0016020	integral component of membrane//membrane	GO:0015095	magnesium ion transmembrane transporter activity	At1g34470	Uncharacterized conserved protein
transcript_HQ_TX_pn_transcript45926/f2p0/1973	1970	55.7	1.9e-131	OAE34786.1	hypothetical protein AXG93_2528s1520 [Marchantia polymorpha subsp. polymorpha]	--	--	--	--	-	-	-	-	-	39.3	1.1e-07	sp|Q49Y21|DNAJ_STAS1	Chaperone protein DnaJ OS=Staphylococcus saprophyticus subsp. saprophyticus (strain ATCC 15305 / DSM 20229) GN=dnaJ PE=3 SV=1	--	--	--	--	--	--	--	At5g23240	Molecular chaperone (DnaJ superfamily)
transcript_HQ_TX_pn_transcript38207/f7p0/2138	2138	80.1	3.3e-259	XP_001772546.1	predicted protein [Physcomitrella patens]	86.778	0	XM_001772494.1	Physcomitrella patens subsp. patens predicted protein (PHYPADRAFT_167618) mRNA, complete cds	K12483	EHD1	EH domain-containing protein 1	-	ko04144; Cellular Processes; Transport and catabolism; Endocytosis	68.1	2.3e-226	sp|Q94CF0|EHD1_ARATH	EH domain-containing protein 1 OS=Arabidopsis thaliana GN=EHD1 PE=1 SV=1	PF13202:EF hand;PF13405:EF-hand domain;PF00036:EF hand;PF08477:Ras of Complex, Roc, domain of DAPkinase;PF12763:Cytoskeletal-regulatory complex EF hand;PF01926:50S ribosome-binding GTPase;PF13499:EF-hand domain pair	GO:0007264	small GTPase mediated signal transduction	--	--	GO:0005509//GO:0005515//GO:0005525	calcium ion binding//protein binding//GTP binding	At3g20290	Endocytosis/signaling protein EHD1
transcript_HQ_TX_pn_transcript61572/f3p0/1535	1535	82.3	1.8e-81	XP_001757697.1	predicted protein [Physcomitrella patens]	--	--	--	--	K13448	CML	calcium-binding protein CML	-	ko04626; Organismal Systems; Environmental adaptation; Plant-pathogen interaction	50.3	5e-45	sp|Q8W4L0|CML49_ARATH	Probable calcium-binding protein CML49 OS=Arabidopsis thaliana GN=CML49 PE=2 SV=1	PF13499:EF-hand domain pair;PF13405:EF-hand domain;PF13202:EF hand;PF00036:EF hand;PF13833:EF-hand domain pair	--	--	--	--	GO:0005509	calcium ion binding	At2g27480	Ca2+-binding protein, EF-Hand protein superfamily
transcript_HQ_TX_pn_transcript69538/f2p0/1221	1219	72.3	1.1e-46	XP_001753258.1	predicted protein [Physcomitrella patens]	--	--	--	--	-	-	-	-	-	--	--	--	--	--	--	--	--	--	--	--	--	--
transcript_HQ_TX_pn_transcript11766/f7p0/3033	3033	35.6	3.4e-47	XP_001765732.1	predicted protein [Physcomitrella patens]	--	--	--	--	-	-	-	-	-	38.5	9e-22	sp|Q55A09|Y9963_DICDI	Probable serine/threonine-protein kinase DDB_G0272254 OS=Dictyostelium discoideum GN=DDB_G0272254 PE=3 SV=1	--	--	--	--	--	--	--	At1g62400	Tyrosine kinase specific for activated (GTP-bound) p21cdc42Hs
transcript_HQ_TX_pn_transcript63671/f17p0/1406	1406	69.8	9.9e-135	XP_001780006.1	predicted protein [Physcomitrella patens]	--	--	--	--	-	-	-	-	-	43.5	3.8e-76	sp|Q9SLN8|DBR_TOBAC	2-alkenal reductase (NADP(+)-dependent) OS=Nicotiana tabacum GN=DBR PE=1 SV=1	PF00107:Zinc-binding dehydrogenase	GO:0055114	oxidation-reduction process	--	--	--	--	At5g16990	Predicted NAD-dependent oxidoreductase
transcript_HQ_TX_pn_transcript13297/f18p0/2985	2982	69.1	1.5e-156	XP_001776989.1	predicted protein [Physcomitrella patens]	--	--	--	--	-	-	-	-	-	41.6	9.3e-88	sp|Q9XE58|SCL14_ARATH	Scarecrow-like protein 14 OS=Arabidopsis thaliana GN=SCL14 PE=2 SV=2	--	--	--	--	--	--	--	--	--
transcript_HQ_TX_pn_transcript1182/f2p0/4615	4615	37.2	8.6e-111	XP_001751318.1	predicted protein [Physcomitrella patens]	--	--	--	--	-	-	-	-	-	32.6	1.1e-07	sp|A8MQN2|LNK1_ARATH	Protein LNK1 OS=Arabidopsis thaliana GN=LNK1 PE=1 SV=1	--	--	--	--	--	--	--	--	--
transcript_HQ_TX_pn_transcript30993/f14p0/2292	2292	51.8	4.5e-121	OAE20002.1	hypothetical protein AXG93_17s1010 [Marchantia polymorpha subsp. polymorpha]	81.368	6.12e-156	XM_001764746.1	Physcomitrella patens subsp. patens predicted protein (PHYPADRAFT_44234) mRNA, partial cds	K12741	HNRNPA1_3	heterogeneous nuclear ribonucleoprotein A1/A3	-	ko03040; Genetic Information Processing; Transcription; Spliceosome	53.7	1.5e-69	sp|Q9LKA4|UBA2C_ARATH	UBP1-associated protein 2C OS=Arabidopsis thaliana GN=UBA2C PE=2 SV=1	PF00076:RNA recognition motif. (a.k.a. RRM, RBD, or RNP domain);PF16367:RNA recognition motif	--	--	--	--	GO:0003676	nucleic acid binding	At3g15010	FOG: RRM domain
transcript_HQ_TX_pn_transcript72254/f2p0/1062	1058	45.5	3.6e-12	XP_001752246.1	predicted protein [Physcomitrella patens]	--	--	--	--	-	-	-	-	-	--	--	--	--	PF05191:Adenylate kinase, active site lid	--	--	--	--	GO:0004017	adenylate kinase activity	--	--
transcript_HQ_TX_pn_transcript47814/f20p0/1915	1915	93.2	2.7e-284	AHI15943.1	flavonoid 3'-hydroxylase [Pohlia nutans]	99.27	0	KF835368.1	Pohlia nutans isolate MFC07506 flavonoid 3'-hydroxylase mRNA, complete cds	-	-	-	-	-	34.9	1.9e-73	sp|Q9SD85|F3PH_ARATH	Flavonoid 3'-monooxygenase OS=Arabidopsis thaliana GN=CYP75B1 PE=1 SV=1	PF00067:Cytochrome P450	GO:0055114	oxidation-reduction process	--	--	GO:0020037//GO:0005506//GO:0016705	heme binding//iron ion binding//oxidoreductase activity, acting on paired donors, with incorporation or reduction of molecular oxygen	At5g07990	Cytochrome P450 CYP2 subfamily
transcript_HQ_TX_pn_transcript38814/f10p0/2099	2099	64.8	5e-175	XP_001784337.1	predicted protein [Physcomitrella patens]	--	--	--	--	-	-	-	-	-	31.3	7.3e-31	sp|O22807|GALS1_ARATH	Galactan beta-1,4-galactosyltransferase GALS1 OS=Arabidopsis thaliana GN=GALS1 PE=2 SV=2	--	--	--	--	--	--	--	At4g20170	Extracellular protein with conserved cysteines
transcript_HQ_TX_pn_transcript64828/f22p0/1433	1433	60.3	6.2e-60	XP_001780595.1	predicted protein [Physcomitrella patens]	--	--	--	--	-	-	-	-	-	--	--	--	--	--	--	--	--	--	--	--	--	--
transcript_HQ_TX_pn_transcript56053/f3p0/1722	1722	59.1	1.2e-97	XP_001768652.1	predicted protein [Physcomitrella patens]	79.827	4.71e-136	XM_001766988.1	Physcomitrella patens subsp. patens predicted protein (PHYPADRAFT_229959) mRNA, complete cds	K15223	UAF30, SPP27	upstream activation factor subunit UAF30	-	-	38.2	7.1e-16	sp|Q05024|TRI1_YEAST	Protein TRI1 OS=Saccharomyces cerevisiae (strain ATCC 204508 / S288c) GN=TRI1 PE=1 SV=1	PF04931:DNA polymerase phi;PF04147:Nop14-like family ;PF06213:Cobalamin biosynthesis protein CobT;PF02724:CDC45-like protein;PF06459:Ryanodine Receptor TM 4-6;PF06524:NOA36 protein;PF00183:Hsp90 protein;PF02201:SWIB/MDM2 domain;PF06632:DNA double-strand break repair and V(D)J recombination protein XRCC4	GO:0006457//GO:0009236//GO:0006310//GO:0006874//GO:0006270//GO:0006950//GO:0006302//GO:0006351	protein folding//cobalamin biosynthetic process//DNA recombination//cellular calcium ion homeostasis//DNA replication initiation//response to stress//double-strand break repair//transcription, DNA-templated	GO:0032040//GO:0016021//GO:0005634	small-subunit processome//integral component of membrane//nucleus	GO:0005524//GO:0005219//GO:0003887//GO:0005515//GO:0008270//GO:0003677//GO:0051082	ATP binding//ryanodine-sensitive calcium-release channel activity//DNA-directed DNA polymerase activity//protein binding//zinc ion binding//DNA binding//unfolded protein binding	At3g19080	RNA polymerase I transcription factor UAF
transcript_HQ_TX_pn_transcript33033/f2p0/2258	2257	79.3	1.1e-244	XP_001771547.1	predicted protein [Physcomitrella patens]	82.838	0	XM_001751409.1	Physcomitrella patens subsp. patens predicted protein (PHYPADRAFT_173789) mRNA, complete cds	K00021	HMGCR	hydroxymethylglutaryl-CoA reductase (NADPH)	1.1.1.34	ko00900; Metabolism; Metabolism of terpenoids and polyketides; Terpenoid backbone biosynthesis | ko04152; Environmental Information Processing; Signal transduction; AMPK signaling pathway | ko04976; Organismal Systems; Digestive system; Bile secretion	61.8	3.9e-187	sp|P29057|HMDH1_HEVBR	3-hydroxy-3-methylglutaryl-coenzyme A reductase 1 OS=Hevea brasiliensis GN=HMGR1 PE=2 SV=1	PF07074:Translocon-associated protein, gamma subunit (TRAP-gamma);PF00368:Hydroxymethylglutaryl-coenzyme A reductase	GO:0006614//GO:0055114//GO:0015936	SRP-dependent cotranslational protein targeting to membrane//oxidation-reduction process//coenzyme A metabolic process	GO:0016021	integral component of membrane	GO:0050662//GO:0004420	coenzyme binding//hydroxymethylglutaryl-CoA reductase (NADPH) activity	At1g76490	3-hydroxy-3-methylglutaryl-CoA (HMG-CoA) reductase
transcript_HQ_TX_pn_transcript29156/f5p0/2399	2399	64	8.4e-211	XP_001777897.1	predicted protein [Physcomitrella patens]	--	--	--	--	-	-	-	-	-	28.5	2.4e-46	sp|Q9LHB1|FDM3_ARATH	Factor of DNA methylation 3 OS=Arabidopsis thaliana GN=FDM3 PE=2 SV=1	PF03468:XS domain;PF03470:XS zinc finger domain	GO:0031047	gene silencing by RNA	--	--	--	--	--	--
transcript_HQ_TX_pn_transcript44786/f3p0/1971	1971	51.9	8e-66	XP_001771951.1	predicted protein [Physcomitrella patens]	--	--	--	--	K14709	SLC39A1_2_3, ZIP1_2_3	solute carrier family 39 (zinc transporter), member 1/2/3	-	-	46.9	3.5e-59	sp|Q94EG9|ZIP11_ARATH	Zinc transporter 11 OS=Arabidopsis thaliana GN=ZIP11 PE=2 SV=1	PF12679:ABC-2 family transporter protein;PF00487:Fatty acid desaturase;PF05365:Ubiquinol-cytochrome C reductase, UQCRX/QCR9 like;PF02535:ZIP Zinc transporter;PF06177:QueT transporter	GO:0055085//GO:0030001//GO:0006629//GO:0006810//GO:0006122	transmembrane transport//metal ion transport//lipid metabolic process//transport//mitochondrial electron transport, ubiquinol to cytochrome c	GO:0005750//GO:0005743//GO:0005886//GO:0016020	mitochondrial respiratory chain complex III//mitochondrial inner membrane//plasma membrane//membrane	GO:0046873	metal ion transmembrane transporter activity	At1g55910	Fe2+/Zn2+ regulated transporter
transcript_HQ_TX_pn_transcript53256/f2p0/1739	1739	70.9	3.5e-142	XP_001768694.1	predicted protein [Physcomitrella patens]	74.138	2.46e-59	EF087382.1	Picea sitchensis clone WS02750_F21 unknown mRNA	-	-	-	-	-	30.8	3.7e-12	sp|Q8U4K7|PGK2_PYRFU	2-phosphoglycerate kinase OS=Pyrococcus furiosus (strain ATCC 43587 / DSM 3638 / JCM 8422 / Vc1) GN=pgk2 PE=3 SV=1	PF00485:Phosphoribulokinase / Uridine kinase family;PF02224:Cytidylate kinase;PF06414:Zeta toxin	GO:0006139//GO:0008152	nucleobase-containing compound metabolic process//metabolic process	--	--	GO:0004127//GO:0005524//GO:0016301	cytidylate kinase activity//ATP binding//kinase activity	--	--
transcript_HQ_TX_pn_transcript20574/f4p0/2680	2680	41.6	1.2e-85	XP_001775069.1	predicted protein [Physcomitrella patens]	--	--	--	--	-	-	-	-	-	--	--	--	--	PF00582:Universal stress protein family;PF01994:tRNA ribose 2'-O-methyltransferase, aTrm56	GO:0002128//GO:0006950	tRNA nucleoside ribose methylation//response to stress	GO:0005737	cytoplasm	GO:0008175	tRNA methyltransferase activity	--	--
transcript_HQ_TX_pn_transcript5066/f3p0/3693	3693	71.7	2.5e-137	XP_001758249.1	predicted protein [Physcomitrella patens]	79.582	0	XM_001771228.1	Physcomitrella patens subsp. patens predicted protein (PHYPADRAFT_137288) mRNA, partial cds	K11855	USP36_42	ubiquitin carboxyl-terminal hydrolase 36/42	3.4.19.12	-	52.1	1e-112	sp|Q67XW5|UBP18_ARATH	Ubiquitin carboxyl-terminal hydrolase 18 OS=Arabidopsis thaliana GN=UBP18 PE=2 SV=2	PF00443:Ubiquitin carboxyl-terminal hydrolase	GO:0016579	protein deubiquitination	--	--	GO:0036459	thiol-dependent ubiquitinyl hydrolase activity	At4g31670	Ubiquitin carboxyl-terminal hydrolase
transcript_HQ_TX_pn_transcript25986/f7p0/2498	2498	99.1	2.8e-124	XP_001781775.1	predicted protein [Physcomitrella patens]	87.228	0	XM_001770242.1	Physcomitrella patens subsp. patens predicted protein (PHYPADRAFT_188774) mRNA, complete cds	K12812	UAP56, BAT1, SUB2	ATP-dependent RNA helicase UAP56/SUB2	3.6.4.13	ko03040; Genetic Information Processing; Transcription; Spliceosome | ko03013; Genetic Information Processing; Translation; RNA transport | ko03015; Genetic Information Processing; Translation; mRNA surveillance pathway | ko05164; Human Diseases; Infectious diseases: Viral; Influenza A	91.3	1.7e-114	sp|Q9LFN6|RH56_ARATH	DEAD-box ATP-dependent RNA helicase 56 OS=Arabidopsis thaliana GN=RH56 PE=1 SV=2	PF04851:Type III restriction enzyme, res subunit;PF00270:DEAD/DEAH box helicase	--	--	--	--	GO:0003677//GO:0016787//GO:0005524//GO:0003676	DNA binding//hydrolase activity//ATP binding//nucleic acid binding	At5g11170	ATP-dependent RNA helicase
transcript_HQ_TX_pn_transcript22549/f3p0/2612	2612	92.4	4.7e-122	XP_001772103.1	predicted protein [Physcomitrella patens]	85.923	0	XM_001772943.1	Physcomitrella patens subsp. patens predicted protein (PHYPADRAFT_191155) mRNA, complete cds	K02728	PSMA4	20S proteasome subunit alpha 3	3.4.25.1	ko03050; Genetic Information Processing; Folding, sorting and degradation; Proteasome	77.6	1.8e-103	sp|P52427|PSA4_SPIOL	Proteasome subunit alpha type-4 OS=Spinacia oleracea GN=PAC1 PE=2 SV=1	PF00227:Proteasome subunit;PF10584:Proteasome subunit A N-terminal signature	GO:0051603//GO:0006511	proteolysis involved in cellular protein catabolic process//ubiquitin-dependent protein catabolic process	GO:0019773//GO:0005839	proteasome core complex, alpha-subunit complex//proteasome core complex	GO:0004175//GO:0004298	endopeptidase activity//threonine-type endopeptidase activity	At3g22110	20S proteasome, regulatory subunit alpha type PSMA4/PRE9
transcript_HQ_TX_pn_transcript38882/f3p0/2138	2138	75	3.1e-07	XP_001784145.1	ATP-binding cassette transporter, subfamily I, member 10, ABC component protein PpABCI10 [Physcomitrella patens]	--	--	--	--	--	--	--	--	--	--	--	--	--	--	--	--	--	--	--	--	--	--
transcript_HQ_TX_pn_transcript7225/f12p0/3462	3462	32.1	1.3e-10	OAE27565.1	hypothetical protein AXG93_2779s1130 [Marchantia polymorpha subsp. polymorpha]	--	--	--	--	-	-	-	-	-	34.3	1.8e-10	sp|P57078|RIPK4_HUMAN	Receptor-interacting serine/threonine-protein kinase 4 OS=Homo sapiens GN=RIPK4 PE=1 SV=1	PF00023:Ankyrin repeat;PF13606:Ankyrin repeat;PF01309:Equine arteritis virus small envelope glycoprotein	--	--	GO:0019031	viral envelope	GO:0005515	protein binding	Hs10190676_2	FOG: Ankyrin repeat
transcript_HQ_TX_pn_transcript30530/f3p0/2312	2312	80	1.6e-214	XP_001779675.1	predicted protein [Physcomitrella patens]	--	--	--	--	-	-	-	-	-	56.1	3.4e-146	sp|Q9SZV0|RNC1_ARATH	Ribonuclease III domain-containing protein RNC1, chloroplastic OS=Arabidopsis thaliana GN=RNC1 PE=2 SV=1	PF00636:Ribonuclease III domain;PF14622:Ribonuclease-III-like	GO:0006396	RNA processing	--	--	GO:0004525	ribonuclease III activity	--	--
transcript_HQ_TX_pn_transcript45744/f2p0/1978	1978	--	--	--	--	--	--	--	--	--	--	--	--	--	--	--	--	--	--	--	--	--	--	--	--	--	--
transcript_HQ_TX_pn_transcript4229/f4p0/3812	3812	61.3	4.6e-219	BAJ83829.1	circadian response regulator 2b [Physcomitrella patens]	76.892	0	AB558267.1	Physcomitrella patens PpCRR1b mRNA for circadian response regulator 1b, complete cds	K12129	PRR7	pseudo-response regulator 7	-	ko04712; Organismal Systems; Environmental adaptation; Circadian rhythm - plant	33.7	2.2e-33	sp|A2YQ93|PRR37_ORYSI	Two-component response regulator-like PRR37 OS=Oryza sativa subsp. indica GN=PRR37 PE=2 SV=2	PF06203:CCT motif;PF00072:Response regulator receiver domain	GO:0000160	phosphorelay signal transduction system	--	--	GO:0005515	protein binding	At5g60100	GATA-4/5/6 transcription factors
transcript_HQ_TX_pn_transcript43390/f2p0/1978	1978	48	5.9e-77	XP_001758315.1	predicted protein [Physcomitrella patens]	--	--	--	--	-	-	-	-	-	--	--	--	--	PF05053:Menin;PF00769:Ezrin/radixin/moesin family	--	--	GO:0005737//GO:0005634//GO:0019898	cytoplasm//nucleus//extrinsic component of membrane	GO:0008092	cytoskeletal protein binding	--	--
transcript_HQ_TX_pn_transcript25627/f2p0/2510	2510	68.4	2.1e-34	ABI64130.1	WRKY transcription factor 3, partial [Physcomitrella patens]	77.297	4.69e-48	DQ889622.1	Physcomitrella patens WRKY transcription factor 3 (WRKY3) mRNA, partial cds	-	-	-	-	-	70.7	1e-26	sp|Q9C983|WRK57_ARATH	Probable WRKY transcription factor 57 OS=Arabidopsis thaliana GN=WRKY57 PE=2 SV=1	PF03106:WRKY DNA -binding domain	GO:0006355	regulation of transcription, DNA-templated	--	--	GO:0003700//GO:0043565	transcription factor activity, sequence-specific DNA binding//sequence-specific DNA binding	--	--
transcript_HQ_TX_pn_transcript30912/f4p0/2335	2335	86.6	4.4e-273	XP_001769041.1	predicted protein [Physcomitrella patens]	76.928	0	XM_001768989.1	Physcomitrella patens subsp. patens predicted protein (PHYPADRAFT_134238) mRNA, complete cds	K06901	pbuG	putative MFS transporter, AGZA family, xanthine/uracil permease	-	-	70.5	3.4e-218	sp|Q9SRK7|AZG1_ARATH	Adenine/guanine permease AZG1 OS=Arabidopsis thaliana GN=AZG1 PE=2 SV=1	PF00860:Permease family;PF16983:Molybdate transporter of MFS superfamily	GO:0015689//GO:0006810//GO:0055085	molybdate ion transport//transport//transmembrane transport	GO:0016020	membrane	GO:0015098//GO:0005215	molybdate ion transmembrane transporter activity//transporter activity	--	--
transcript_HQ_TX_pn_transcript61135/f4p0/1320	1320	81.7	1.6e-123	XP_001774454.1	predicted protein [Physcomitrella patens]	80.253	1.24e-165	XM_001774402.1	Physcomitrella patens subsp. patens predicted protein (PHYPADRAFT_110250) mRNA, complete cds	-	-	-	-	-	33	1.3e-25	sp|Q55CU8|RSC5_DICDI	Random slug protein 5 OS=Dictyostelium discoideum GN=rsc5 PE=2 SV=1	--	--	--	--	--	--	--	At1g22180	Phosphatidylinositol transfer protein PDR16 and related proteins
transcript_HQ_TX_pn_transcript71046/f2p0/1146	1146	87.8	3.7e-148	XP_001775327.1	predicted protein [Physcomitrella patens]	--	--	--	--	-	-	-	-	-	48.7	1.1e-70	sp|Q4DJ07|PGFS_TRYCC	Prostaglandin F synthase OS=Trypanosoma cruzi (strain CL Brener) GN=Tc00.1047053511287.49 PE=1 SV=2	--	--	--	--	--	--	--	SPAC2F3.05c	Aldo/keto reductase family proteins
transcript_HQ_TX_pn_transcript72323/f3p0/1070	1070	55.8	1.6e-31	XP_001783831.1	predicted protein [Physcomitrella patens]	--	--	--	--	--	--	--	--	--	--	--	--	--	--	--	--	--	--	--	--	--	--
transcript_HQ_TX_pn_transcript9317/f4p0/3125	3125	57.7	5.1e-224	XP_001772202.1	predicted protein [Physcomitrella patens]	--	--	--	--	-	-	-	-	-	--	--	--	--	--	--	--	--	--	--	--	--	--
transcript_HQ_TX_pn_transcript76727/f7p0/570	570	--	--	--	--	--	--	--	--	--	--	--	--	--	--	--	--	--	PF02496:ABA/WDS induced protein	GO:0006950	response to stress	--	--	--	--	--	--
transcript_HQ_TX_pn_transcript68788/f2p0/1269	1269	34.1	2.9e-08	KXG27429.1	hypothetical protein SORBI_006G266400 [Sorghum bicolor]	--	--	--	--	-	-	-	-	-	33.1	1.5e-07	sp|P26307|VIV1_MAIZE	Regulatory protein viviparous-1 OS=Zea mays GN=VP1 PE=2 SV=1	--	--	--	--	--	--	--	--	--
transcript_HQ_TX_pn_transcript71879/f2p0/1091	1091	67.2	1.9e-109	XP_001770043.1	predicted protein [Physcomitrella patens]	86.233	0	XM_001764602.1	Physcomitrella patens subsp. patens predicted protein (PHYPADRAFT_128243) mRNA, partial cds	-	-	-	-	-	--	--	--	--	PF04140:Isoprenylcysteine carboxyl methyltransferase (ICMT) family ;PF02544:3-oxo-5-alpha-steroid 4-dehydrogenase	GO:0006629//GO:0006481	lipid metabolic process//C-terminal protein methylation	GO:0016021//GO:0005737	integral component of membrane//cytoplasm	GO:0004671//GO:0016627	protein C-terminal S-isoprenylcysteine carboxyl O-methyltransferase activity//oxidoreductase activity, acting on the CH-CH group of donors	At1g18180	Predicted steroid reductase
transcript_HQ_TX_pn_transcript25667/f8p0/2500	2500	82.3	1.6e-257	XP_001765431.1	predicted protein [Physcomitrella patens]	83.76	0	XM_001765379.1	Physcomitrella patens subsp. patens predicted protein (PHYPADRAFT_184701) mRNA, complete cds	-	-	-	-	-	51.6	1.3e-146	sp|B9DFS6|SNX2B_ARATH	Sorting nexin 2B OS=Arabidopsis thaliana GN=SNX2B PE=1 SV=1	PF00787:PX domain	--	--	--	--	GO:0035091	phosphatidylinositol binding	At5g58440	Membrane coat complex Retromer, subunit VPS5/SNX1, Sorting nexins, and related PX domain-containing proteins
transcript_HQ_TX_pn_transcript74324/f3p0/888	888	39.9	1.7e-23	XP_001763251.1	predicted protein [Physcomitrella patens]	--	--	--	--	-	-	-	-	-	--	--	--	--	PF00403:Heavy-metal-associated domain	GO:0030001	metal ion transport	--	--	GO:0046872	metal ion binding	--	--
transcript_HQ_TX_pn_transcript22842/f5p0/2602	2602	71.8	6.2e-167	XP_001757972.1	predicted protein [Physcomitrella patens]	78.325	4.76e-63	XM_001761870.1	Physcomitrella patens subsp. patens predicted protein (PHYPADRAFT_124817) mRNA, partial cds	-	-	-	-	-	23.9	1.5e-25	sp|Q9M0E1|FBL77_ARATH	F-box/LRR-repeat protein At4g29420 OS=Arabidopsis thaliana GN=At4g29420 PE=2 SV=1	PF04546:Sigma-70, non-essential region;PF15243:Anaphase-promoting complex subunit 15;PF12937:F-box-like;PF04889:Cwf15/Cwc15 cell cycle control protein;PF04147:Nop14-like family	GO:0006355//GO:0090266//GO:0000398//GO:0006352	regulation of transcription, DNA-templated//regulation of mitotic cell cycle spindle assembly checkpoint//mRNA splicing, via spliceosome//DNA-templated transcription, initiation	GO:0005680//GO:0005681//GO:0032040	anaphase-promoting complex//spliceosomal complex//small-subunit processome	GO:0003677//GO:0016987//GO:0005515//GO:0003700	DNA binding//sigma factor activity//protein binding//transcription factor activity, sequence-specific DNA binding	--	--
transcript_HQ_TX_pn_transcript51833/f21p0/1762	1762	47	1.1e-50	XP_001761972.1	predicted protein [Physcomitrella patens]	--	--	--	--	-	-	-	-	-	--	--	--	--	PF04999:Cell division protein FtsL;PF01436:NHL repeat	GO:0007049//GO:0051301	cell cycle//cell division	GO:0016021	integral component of membrane	GO:0005515	protein binding	--	--
transcript_HQ_TX_pn_transcript45450/f4p0/1982	1982	63.8	1.3e-129	XP_001780179.1	predicted protein [Physcomitrella patens]	--	--	--	--	-	-	-	-	-	43.2	1.3e-74	sp|Q8LEA8|EID1_ARATH	Phytochrome A-associated F-box protein OS=Arabidopsis thaliana GN=EID1 PE=1 SV=2	PF00646:F-box domain;PF12937:F-box-like	--	--	--	--	GO:0005515	protein binding	--	--
transcript_HQ_TX_pn_transcript23133/f2p0/2593	2593	79	0	XP_001779439.1	predicted protein [Physcomitrella patens]	82.538	0	XM_001779387.1	Physcomitrella patens subsp. patens predicted protein (PHYPADRAFT_147342) mRNA, complete cds	K16900	TPC1, CCH1	two pore calcium channel protein, plant	-	-	49	5.6e-190	sp|Q75VR0|TPC1B_TOBAC	Two pore calcium channel protein 1B OS=Nicotiana tabacum GN=TPC1B PE=2 SV=1	PF01348:Type II intron maturase;PF13499:EF-hand domain pair;PF00520:Ion transport protein;PF13833:EF-hand domain pair;PF00036:EF hand;PF13405:EF-hand domain	GO:0006811//GO:0006397//GO:0055085	ion transport//mRNA processing//transmembrane transport	GO:0016020	membrane	GO:0005509//GO:0005216	calcium ion binding//ion channel activity	At4g03560	Voltage-gated Ca2+ channels, alpha1 subunits
transcript_HQ_TX_pn_transcript16786/f2p0/2847	2847	71.6	3.6e-152	XP_001781220.1	predicted protein [Physcomitrella patens]	81.791	9.87e-155	XM_001781168.1	Physcomitrella patens subsp. patens predicted protein (PHYPADRAFT_224718) mRNA, complete cds	K10290	FBXO3	F-box protein 3	-	-	42.3	9.8e-79	sp|Q9LND7|SKI16_ARATH	F-box protein SKIP16 OS=Arabidopsis thaliana GN=SKIP16 PE=1 SV=1	--	--	--	--	--	--	--	At1g06110	Putative Mg2+ and Co2+ transporter CorD
transcript_HQ_TX_pn_transcript54656/f2p0/1759	1759	33.3	3e-32	ADD23217.1	cinnamyl alcohol dehydrogenase [Cistanche deserticola]	--	--	--	--	-	-	-	-	-	29.8	3.9e-25	sp|Q9S9N9|CCR1_ARATH	Cinnamoyl-CoA reductase 1 OS=Arabidopsis thaliana GN=CCR1 PE=1 SV=1	PF01370:NAD dependent epimerase/dehydratase family;PF01073:3-beta hydroxysteroid dehydrogenase/isomerase family	GO:0055114//GO:0006694	oxidation-reduction process//steroid biosynthetic process	--	--	GO:0016616//GO:0003854//GO:0050662//GO:0003824	oxidoreductase activity, acting on the CH-OH group of donors, NAD or NADP as acceptor//3-beta-hydroxy-delta5-steroid dehydrogenase activity//coenzyme binding//catalytic activity	At5g19440	Flavonol reductase/cinnamoyl-CoA reductase
transcript_HQ_TX_pn_transcript63603/f3p0/1491	1491	50.9	7.8e-106	XP_019157748.1	PREDICTED: putative nuclease HARBI1 [Ipomoea nil]	--	--	--	--	-	-	-	-	-	--	--	--	--	--	--	--	--	--	--	--	--	--
transcript_HQ_TX_pn_transcript55781/f6p0/1726	1726	49.1	1.5e-31	BAG50059.1	transcription factor AP2-EREBP [Lotus japonicus]	78.571	3.32e-23	XM_019564893.1	PREDICTED: Lupinus angustifolius ethylene-responsive transcription factor 1A-like (LOC109330641), mRNA	K14517	ERF2	ethylene-responsive transcription factor 2	-	ko04075; Environmental Information Processing; Signal transduction; Plant hormone signal transduction	49.4	3.2e-32	sp|O80338|EF101_ARATH	Ethylene-responsive transcription factor 2 OS=Arabidopsis thaliana GN=ERF2 PE=2 SV=1	PF00847:AP2 domain	GO:0006355	regulation of transcription, DNA-templated	--	--	GO:0003700	transcription factor activity, sequence-specific DNA binding	--	--
transcript_HQ_TX_pn_transcript43637/f10p0/2019	2019	37.6	2.6e-19	XP_001785460.1	predicted protein [Physcomitrella patens]	--	--	--	--	--	--	--	--	--	--	--	--	--	--	--	--	--	--	--	--	--	--
transcript_HQ_TX_pn_transcript63587/f2p0/1491	1491	89.3	2.6e-101	XP_001785261.1	Rab6/RabH-family small GTPase [Physcomitrella patens]	89.425	0	XM_001759723.1	Physcomitrella patens subsp. patens Rab6/RabH-family small GTPase (RabH23) mRNA, complete cds	K07893	RAB6A	Ras-related protein Rab-6A	-	-	80.6	3e-87	sp|Q9LFT9|RAH1E_ARATH	Ras-related protein RABH1e OS=Arabidopsis thaliana GN=RABH1E PE=2 SV=1	PF02421:Ferrous iron transport protein B;PF08477:Ras of Complex, Roc, domain of DAPkinase;PF03193:Protein of unknown function, DUF258;PF00025:ADP-ribosylation factor family;PF01926:50S ribosome-binding GTPase;PF04670:Gtr1/RagA G protein conserved region;PF00071:Ras family	GO:0007264	small GTPase mediated signal transduction	--	--	GO:0003924//GO:0005525	GTPase activity//GTP binding	At5g10260	GTPase Rab6/YPT6/Ryh1, small G protein superfamily
transcript_HQ_TX_pn_transcript33159/f5p0/2251	2251	69.3	1.3e-165	XP_001762119.1	predicted protein [Physcomitrella patens]	83.631	0	XM_001762067.1	Physcomitrella patens subsp. patens predicted protein (PHYPADRAFT_109808) mRNA, complete cds	K15688	MUL1	E3 ubiquitin-protein ligase MUL1	2.3.2.27	-	35.9	1.7e-49	sp|Q9SYH3|SPL2P_ARATH	E3 ubiquitin-protein ligase SPL2 OS=Arabidopsis thaliana GN=SPL2 PE=2 SV=1	PF12483:E3 Ubiquitin ligase;PF14634:zinc-RING finger domain;PF13639:Ring finger domain;PF00097:Zinc finger, C3HC4 type (RING finger)	GO:0006996//GO:0016567	organelle organization//protein ubiquitination	--	--	GO:0008270//GO:0005515//GO:0046872//GO:0004842	zinc ion binding//protein binding//metal ion binding//ubiquitin-protein transferase activity	At1g54150	Predicted E3 ubiquitin ligase
transcript_HQ_TX_pn_transcript50432/f4p0/1864	1864	37.9	3.3e-45	XP_001765732.1	predicted protein [Physcomitrella patens]	--	--	--	--	-	-	-	-	-	34.6	6.3e-26	sp|P25848|PHY1_CERPU	Light-sensor Protein kinase OS=Ceratodon purpureus GN=PHY1 PE=3 SV=3	PF00069:Protein kinase domain;PF07714:Protein tyrosine kinase	GO:0006468	protein phosphorylation	--	--	GO:0005524//GO:0004672	ATP binding//protein kinase activity	At4g31170	Tyrosine kinase specific for activated (GTP-bound) p21cdc42Hs
transcript_HQ_TX_pn_transcript13374/f3p0/2955	2955	68.2	1.3e-152	XP_001770794.1	predicted protein [Physcomitrella patens]	91.837	5.85e-08	NM_001305851.1	Zea mays scarecrow-like protein 23 (LOC542138), mRNA	-	-	-	-	-	35.2	1.8e-59	sp|Q8S4W7|GAI1_VITVI	DELLA protein GAI1 OS=Vitis vinifera GN=GAI1 PE=2 SV=1	--	--	--	--	--	--	--	--	--
transcript_HQ_TX_pn_transcript55536/f4p0/1730	1730	71.8	1.5e-87	XP_001779248.1	predicted protein [Physcomitrella patens]	--	--	--	--	-	-	-	-	-	--	--	--	--	--	--	--	--	--	--	--	At1g44960	Predicted membrane protein
transcript_HQ_TX_pn_transcript54713/f12p0/1735	1734	88.3	1.8e-138	XP_001769374.1	predicted protein [Physcomitrella patens]	81.896	0	XM_001755163.1	Physcomitrella patens subsp. patens predicted protein (PHYPADRAFT_203817) mRNA, complete cds	K20604	MKK9	mitogen-activated protein kinase kinase 9	2.7.12.2	ko04016; Environmental Information Processing; Signal transduction; MAPK signaling pathway - plant	49	3.4e-74	sp|Q9FX43|M2K9_ARATH	Mitogen-activated protein kinase kinase 9 OS=Arabidopsis thaliana GN=MKK9 PE=1 SV=1	PF06293:Lipopolysaccharide kinase (Kdo/WaaP) family;PF07714:Protein tyrosine kinase;PF00069:Protein kinase domain	GO:0006468	protein phosphorylation	GO:0016020	membrane	GO:0004672//GO:0016773//GO:0005524	protein kinase activity//phosphotransferase activity, alcohol group as acceptor//ATP binding	At1g73500	Mitogen-activated protein kinase kinase (MAP2K)
transcript_HQ_TX_pn_transcript43826/f2p0/2023	2023	66.9	2.6e-152	XP_001751245.1	predicted protein [Physcomitrella patens]	--	--	--	--	-	-	-	-	-	--	--	--	--	PF01344:Kelch motif	--	--	--	--	GO:0005515	protein binding	--	--
transcript_HQ_TX_pn_transcript25572/f3p0/2436	2435	86.6	1.6e-169	XP_001771548.1	predicted protein [Physcomitrella patens]	78.449	0	XM_001771496.1	Physcomitrella patens subsp. patens predicted protein (PHYPADRAFT_137677) mRNA, partial cds	K00006	GPD1	glycerol-3-phosphate dehydrogenase (NAD+)	1.1.1.8	ko00564; Metabolism; Lipid metabolism; Glycerophospholipid metabolism | ko04011; Environmental Information Processing; Signal transduction; MAPK signaling pathway - yeast	64.8	1.5e-131	sp|Q949Q0|GPDA2_ARATH	Glycerol-3-phosphate dehydrogenase [NAD(+)] 2, chloroplastic OS=Arabidopsis thaliana GN=GLY1 PE=1 SV=1	PF00070:Pyridine nucleotide-disulphide oxidoreductase;PF02254:TrkA-N domain;PF07479:NAD-dependent glycerol-3-phosphate dehydrogenase C-terminus;PF02737:3-hydroxyacyl-CoA dehydrogenase, NAD binding domain;PF07992:Pyridine nucleotide-disulphide oxidoreductase;PF13241:Putative NAD(P)-binding;PF02056:Family 4 glycosyl hydrolase;PF01210:NAD-dependent glycerol-3-phosphate dehydrogenase N-terminus;PF034…	GO:0006813//GO:0005975//GO:0006629//GO:0006779//GO:0019354//GO:0046168//GO:0006631//GO:0055114	potassium ion transport//carbohydrate metabolic process//lipid metabolic process//porphyrin-containing compound biosynthetic process//siroheme biosynthetic process//glycerol-3-phosphate catabolic process//fatty acid metabolic process//oxidation-reduction process	--	--	GO:0051287//GO:0043115//GO:0016491//GO:0016616//GO:0004553//GO:0003857//GO:0004367//GO:0008677	NAD binding//precorrin-2 dehydrogenase activity//oxidoreductase activity//oxidoreductase activity, acting on the CH-OH group of donors, NAD or NADP as acceptor//hydrolase activity, hydrolyzing O-glycosyl compounds//3-hydroxyacyl-CoA dehydrogenase activity//glycerol-3-phosphate dehydrogenase [NAD+] activity//2-dehydropantoate 2-reductase activity	At2g40690	Glycerol-3-phosphate dehydrogenase/dihydroxyacetone 3-phosphate reductase
transcript_HQ_TX_pn_transcript28034/f3p0/2379	2376	72.6	6.9e-181	ABK24621.1	unknown [Picea sitchensis]	--	--	--	--	K18550	ISN1	IMP and pyridine-specific 5'-nucleotidase [EC:3.1.3.99 3.1.3.-]	3.1.3.99,3.1.3.-	ko00230; Metabolism; Nucleotide metabolism; Purine metabolism | ko00760; Metabolism; Metabolism of cofactors and vitamins; Nicotinate and nicotinamide metabolism	40.3	7e-62	sp|Q75EG6|ISN1_ASHGO	IMP-specific 5'-nucleotidase 1 OS=Ashbya gossypii (strain ATCC 10895 / CBS 109.51 / FGSC 9923 / NRRL Y-1056) GN=ISN1 PE=3 SV=1	PF06437:IMP-specific 5'-nucleotidase	GO:0009117//GO:0006190	nucleotide metabolic process//inosine salvage	--	--	GO:0000287//GO:0050483	magnesium ion binding//IMP 5'-nucleotidase activity	--	--
transcript_HQ_TX_pn_transcript60029/f25p0/1516	1517	63.4	1.8e-150	XP_001764365.1	predicted protein [Physcomitrella patens]	--	--	--	--	K02927	RP-L40e, RPL40	large subunit ribosomal protein L40e	-	ko03010; Genetic Information Processing; Translation; Ribosome	29.5	2.6e-09	sp|P05759|RS27A_YEAST	Ubiquitin-40S ribosomal protein S31 OS=Saccharomyces cerevisiae (strain ATCC 204508 / S288c) GN=RPS31 PE=1 SV=3	PF00240:Ubiquitin family;PF12678:RING-H2 zinc finger domain;PF14634:zinc-RING finger domain;PF12861:Anaphase-promoting complex subunit 11 RING-H2 finger;PF00097:Zinc finger, C3HC4 type (RING finger);PF17123:RING-like zinc finger;PF13639:Ring finger domain	--	--	GO:0005680	anaphase-promoting complex	GO:0008270//GO:0004842//GO:0046872//GO:0005515	zinc ion binding//ubiquitin-protein transferase activity//metal ion binding//protein binding	YLR167w	Ubiquitin/40S ribosomal protein S27a fusion
transcript_HQ_TX_pn_transcript39420/f4p0/2059	2059	85.3	2.1e-165	XP_001785275.1	predicted protein [Physcomitrella patens]	78.736	6.86e-180	XM_001785223.1	Physcomitrella patens subsp. patens predicted protein (PHYPADRAFT_155233) mRNA, complete cds	-	-	-	-	-	52.5	2.1e-86	sp|Q9MUM3|CCSA_MESVI	Cytochrome c biogenesis protein CcsA OS=Mesostigma viride GN=ccsA PE=3 SV=1	PF01578:Cytochrome C assembly protein	GO:0017004	cytochrome complex assembly	--	--	GO:0020037	heme binding	--	--
transcript_HQ_TX_pn_transcript23269/f2p0/2592	2592	86	5.4e-203	XP_001778757.1	predicted protein [Physcomitrella patens]	78.834	0	XM_001774303.1	Physcomitrella patens subsp. patens predicted protein (PHYPADRAFT_168416) mRNA, complete cds	-	-	-	-	-	39.3	1.3e-13	sp|Q84MB2|TIF8_ARATH	Protein TIFY 8 OS=Arabidopsis thaliana GN=TIFY8 PE=1 SV=1	--	--	--	--	--	--	--	--	--
transcript_HQ_TX_pn_transcript30062/f3p0/2357	2357	91.9	7e-242	XP_001775132.1	predicted protein [Physcomitrella patens]	86.826	0	XM_001775080.1	Physcomitrella patens subsp. patens predicted protein (PHYPADRAFT_107706) mRNA, complete cds	K07198	PRKAA, AMPK	5'-AMP-activated protein kinase, catalytic alpha subunit	2.7.11.11	ko04371; Environmental Information Processing; Signal transduction; Apelin signaling pathway | ko04068; Environmental Information Processing; Signal transduction; FoxO signaling pathway | ko04151; Environmental Information Processing; Signal transduction; PI3K-Akt signaling pathway | ko04152; Environmental Information Processing; Signal transduction; AMPK signaling pathway | ko04150; Environmenta…	69.6	6.5e-177	sp|Q6ZLP5|CIPKN_ORYSJ	CBL-interacting protein kinase 23 OS=Oryza sativa subsp. japonica GN=CIPK23 PE=2 SV=1	PF03822:NAF domain;PF06293:Lipopolysaccharide kinase (Kdo/WaaP) family;PF07714:Protein tyrosine kinase;PF00069:Protein kinase domain;PF09269:Domain of unknown function (DUF1967)	GO:0007165//GO:0006468	signal transduction//protein phosphorylation	GO:0016020	membrane	GO:0016773//GO:0004672//GO:0005524//GO:0000166	phosphotransferase activity, alcohol group as acceptor//protein kinase activity//ATP binding//nucleotide binding	At1g01140	Serine/threonine protein kinase
transcript_HQ_TX_pn_transcript57492/f2p0/1643	1643	75.9	4.8e-189	XP_001757816.1	predicted protein [Physcomitrella patens]	--	--	--	--	K18151	UAH	ureidoglycolate amidohydrolase	3.5.1.116	ko00230; Metabolism; Nucleotide metabolism; Purine metabolism	60.4	4.9e-139	sp|Q2QMN7|UAH_ORYSJ	Probable ureidoglycolate hydrolase OS=Oryza sativa subsp. japonica GN=UAH PE=1 SV=2	PF01546:Peptidase family M20/M25/M40	GO:0008152	metabolic process	--	--	GO:0016787	hydrolase activity	--	--
transcript_HQ_TX_pn_transcript39832/f5p0/2205	2205	87	3.3e-270	XP_001777588.1	predicted protein [Physcomitrella patens]	81.812	0	XM_001780939.1	Physcomitrella patens subsp. patens predicted protein (PHYPADRAFT_197372) mRNA, complete cds	-	-	-	-	-	56.3	3e-160	sp|Q9XZD5|CATA_TOXGO	Peroxisomal catalase OS=Toxoplasma gondii PE=2 SV=1	PF00199:Catalase	GO:0055114	oxidation-reduction process	--	--	GO:0020037//GO:0004096	heme binding//catalase activity	Hs4557014	Catalase
transcript_HQ_TX_pn_transcript30301/f2p0/2366	2366	85.3	6e-193	XP_001785820.1	predicted protein [Physcomitrella patens]	83.142	0	XM_001785768.1	Physcomitrella patens subsp. patens predicted protein (PHYPADRAFT_156302) mRNA, complete cds	K01176	AMY, amyA, malS	alpha-amylase	3.2.1.1	ko00500; Metabolism; Carbohydrate metabolism; Starch and sucrose metabolism | ko04973; Organismal Systems; Digestive system; Carbohydrate digestion and absorption	60.9	9.2e-131	sp|Q8LFG1|AMY2_ARATH	Probable alpha-amylase 2 OS=Arabidopsis thaliana GN=AMY2 PE=2 SV=1	PF07821:Alpha-amylase C-terminal beta-sheet domain;PF00128:Alpha amylase, catalytic domain	GO:0005975	carbohydrate metabolic process	--	--	GO:0005509//GO:0003824//GO:0004556	calcium ion binding//catalytic activity//alpha-amylase activity	At1g76130	Alpha-amylase
transcript_HQ_TX_pn_transcript42083/f18p0/2019	2019	76.5	7.9e-186	XP_001751301.1	predicted protein [Physcomitrella patens]	75.194	1.08e-23	XM_014664627.1	PREDICTED: Vigna radiata var. radiata putative 12-oxophytodienoate reductase 11 (LOC106777106), mRNA	K05894	OPR	12-oxophytodienoic acid reductase	1.3.1.42	ko00592; Metabolism; Lipid metabolism; alpha-Linolenic acid metabolism	63	5.8e-134	sp|B9FSC8|OPR11_ORYSJ	Putative 12-oxophytodienoate reductase 11 OS=Oryza sativa subsp. japonica GN=OPR11 PE=2 SV=1	PF00724:NADH:flavin oxidoreductase / NADH oxidase family	GO:0055114	oxidation-reduction process	--	--	GO:0016491//GO:0010181	oxidoreductase activity//FMN binding	At1g76690	NADH:flavin oxidoreductase/12-oxophytodienoate reductase
transcript_HQ_TX_pn_transcript71631/f5p0/1107	1107	50.3	1.5e-37	XP_001768152.1	predicted protein [Physcomitrella patens]	97.368	2.79e-07	XM_001783104.1	Physcomitrella patens subsp. patens predicted protein (PHYPADRAFT_152095) mRNA, complete cds	-	-	-	-	-	48.4	1.1e-09	sp|B7HPL2|DNAJ_BACC7	Chaperone protein DnaJ OS=Bacillus cereus (strain AH187) GN=dnaJ PE=3 SV=1	--	--	--	--	--	--	--	At2g22360	Molecular chaperone (DnaJ superfamily)
transcript_HQ_TX_pn_transcript30330/f3p0/2312	2312	69.6	2.9e-216	AHI15954.1	flavonoid 3'-hydroxylase [Pohlia nutans]	83.247	0	KF835379.1	Pohlia nutans isolate MFC85494 flavonoid 3'-hydroxylase mRNA, complete cds	K20623	CYP92A6	typhasterol/6-deoxotyphasterol 2alpha-hydroxylase	-	-	31.9	1.8e-70	sp|Q9SD85|F3PH_ARATH	Flavonoid 3'-monooxygenase OS=Arabidopsis thaliana GN=CYP75B1 PE=1 SV=1	PF00067:Cytochrome P450	GO:0055114	oxidation-reduction process	--	--	GO:0005506//GO:0016705//GO:0020037	iron ion binding//oxidoreductase activity, acting on paired donors, with incorporation or reduction of molecular oxygen//heme binding	At5g07990	Cytochrome P450 CYP2 subfamily
transcript_HQ_TX_pn_transcript27672/f4p0/2381	2381	82.7	1.9e-146	XP_001771632.1	predicted protein [Physcomitrella patens]	84.92	0	XM_001771580.1	Physcomitrella patens subsp. patens predicted protein (PHYPADRAFT_44894) mRNA, partial cds	-	-	-	-	-	27.4	2.5e-19	sp|O94673|YG75_SCHPO	Uncharacterized membrane protein C776.05 OS=Schizosaccharomyces pombe (strain 972 / ATCC 24843) GN=SPBC776.05 PE=4 SV=2	--	--	--	--	--	--	--	At5g35460	Uncharacterized conserved protein
transcript_HQ_TX_pn_transcript53962/f28p0/1749	1749	87.2	6.2e-163	XP_001753698.1	predicted protein [Physcomitrella patens]	86.853	0	XM_001753646.1	Physcomitrella patens subsp. patens predicted protein (PHYPADRAFT_114476) mRNA, complete cds	K03146	THI4, THI1	thiamine thiazole synthase	-	ko00730; Metabolism; Metabolism of cofactors and vitamins; Thiamine metabolism	87.2	6.1e-164	sp|A9RHW6|THI43_PHYPA	Thiamine thiazole synthase 3, chloroplastic OS=Physcomitrella patens subsp. patens GN=THI1-3 PE=3 SV=1	--	--	--	--	--	--	--	At5g54770	Protein involved in thiamine biosynthesis and DNA damage tolerance
transcript_HQ_TX_pn_transcript37897/f2p0/2168	2167	89.5	1.2e-232	XP_001757031.1	predicted protein [Physcomitrella patens]	86.309	0	XM_001756979.1	Physcomitrella patens subsp. patens predicted protein (PHYPADRAFT_69881) mRNA, complete cds	-	-	-	-	-	66.3	2.3e-176	sp|Q9FN03|UVR8_ARATH	Ultraviolet-B receptor UVR8 OS=Arabidopsis thaliana GN=UVR8 PE=1 SV=1	--	--	--	--	--	--	--	At5g63860	FOG: RCC1 domain
transcript_HQ_TX_pn_transcript66379/f2p0/1383	1383	75.2	7.2e-130	XP_001759159.1	predicted protein [Physcomitrella patens]	80	1.29e-170	XM_001757141.1	Physcomitrella patens subsp. patens predicted protein (PHYPADRAFT_118758) mRNA, complete cds	K10782	FATA	fatty acyl-ACP thioesterase A	3.1.2.14	ko00061; Metabolism; Lipid metabolism; Fatty acid biosynthesis	41.9	2.4e-62	sp|Q9SV64|FATA2_ARATH	Oleoyl-acyl carrier protein thioesterase 2, chloroplastic OS=Arabidopsis thaliana GN=FATA2 PE=2 SV=1	PF01643:Acyl-ACP thioesterase;PF06553:BNIP3	GO:0043065//GO:0006633	positive regulation of apoptotic process//fatty acid biosynthetic process	GO:0005740//GO:0016021	mitochondrial envelope//integral component of membrane	GO:0016790	thiolester hydrolase activity	--	--
transcript_HQ_TX_pn_transcript8894/f3p0/3314	3314	59.9	9.2e-107	XP_001779982.1	predicted protein [Physcomitrella patens]	--	--	--	--	--	--	--	--	--	--	--	--	--	--	--	--	--	--	--	--	--	--
transcript_HQ_TX_pn_transcript45087/f54p0/1923	1923	74.3	6.2e-164	ABB84527.1	chalcone synthase [Physcomitrella patens]	75.952	1.1e-157	DQ275627.2	Physcomitrella patens chalcone synthase mRNA, complete cds	K00660	CHS	chalcone synthase	2.3.1.74	ko00941; Metabolism; Biosynthesis of other secondary metabolites; Flavonoid biosynthesis | ko04712; Organismal Systems; Environmental adaptation; Circadian rhythm - plant	55.8	4.7e-117	sp|Q9SEP4|CHSY_ARAAL	Chalcone synthase OS=Arabis alpina GN=CHS PE=3 SV=1	PF08392:FAE1/Type III polyketide synthase-like protein;PF08545:3-Oxoacyl-[acyl-carrier-protein (ACP)] synthase III	GO:0006633	fatty acid biosynthetic process	GO:0016020	membrane	GO:0016747//GO:0004315	transferase activity, transferring acyl groups other than amino-acyl groups//3-oxoacyl-[acyl-carrier-protein] synthase activity	--	--
transcript_HQ_TX_pn_transcript72677/f3p0/1030	1030	55.2	1e-43	XP_001760667.1	predicted protein [Physcomitrella patens]	--	--	--	--	-	-	-	-	-	--	--	--	--	--	--	--	--	--	--	--	--	--
transcript_HQ_TX_pn_transcript61164/f2p0/1550	1550	77	1.6e-74	XP_001781765.1	predicted protein [Physcomitrella patens]	82.237	1.51e-140	XM_001781713.1	Physcomitrella patens subsp. patens predicted protein (PHYPADRAFT_171800) mRNA, complete cds	-	-	-	-	-	--	--	--	--	--	--	--	--	--	--	--	--	--
transcript_HQ_TX_pn_transcript65307/f6p0/1416	1416	42.6	2.8e-52	XP_016175103.1	PREDICTED: short-chain dehydrogenase TIC 32, chloroplastic-like [Arachis ipaensis]	--	--	--	--	-	-	-	-	-	51.5	4.7e-74	sp|Q03326|OXIR_STRAT	Probable oxidoreductase OS=Streptomyces antibioticus PE=3 SV=1	PF12242:NAD(P)H binding domain of trans-2-enoyl-CoA reductase	GO:0055114	oxidation-reduction process	--	--	GO:0016491	oxidoreductase activity	At4g11410	Dehydrogenases with different specificities (related to short-chain alcohol dehydrogenases)
transcript_HQ_TX_pn_transcript15524/f2p0/2915	2915	54.7	1.2e-123	BAL46027.1	Dof transcription factor [Physcomitrella patens]	80.1	3.35e-30	XM_011088938.1	PREDICTED: Sesamum indicum cyclic dof factor 1 (LOC105168787), mRNA	-	-	-	-	-	68.8	1.8e-27	sp|Q93ZL5|CDF2_ARATH	Cyclic dof factor 2 OS=Arabidopsis thaliana GN=CDF2 PE=1 SV=2	PF02701:Dof domain, zinc finger	GO:0006355	regulation of transcription, DNA-templated	--	--	GO:0003677	DNA binding	--	--
transcript_HQ_TX_pn_transcript34306/f6p0/2123	2124	53.4	1.1e-44	AMT92118.1	dehydration-responsive element-binding protein 5-10 [Syntrichia caninervis]	--	--	--	--	-	-	-	-	-	40	1e-08	sp|Q84QC2|ERF17_ARATH	Ethylene-responsive transcription factor ERF017 OS=Arabidopsis thaliana GN=ERF017 PE=2 SV=1	PF00847:AP2 domain	GO:0006355	regulation of transcription, DNA-templated	--	--	GO:0003700	transcription factor activity, sequence-specific DNA binding	--	--
transcript_HQ_TX_pn_transcript51218/f3p0/1810	1810	72.5	8.3e-219	XP_001777628.1	predicted protein [Physcomitrella patens]	78.944	0	XM_001777576.1	Physcomitrella patens subsp. patens predicted protein (PHYPADRAFT_145128) mRNA, complete cds	K00599	METTL6	methyltransferase-like protein 6	2.1.1.-	-	46.1	1.7e-52	sp|Q6AXU8|METL6_RAT	Methyltransferase-like protein 6 OS=Rattus norvegicus GN=Mettl6 PE=2 SV=1	PF05175:Methyltransferase small domain;PF02390:Putative methyltransferase ;PF03141:Putative S-adenosyl-L-methionine-dependent methyltransferase;PF00891:O-methyltransferase;PF08241:Methyltransferase domain;PF01234:NNMT/PNMT/TEMT family;PF01209:ubiE/COQ5 methyltransferase family;PF05891:AdoMet dependent proline di-methyltransferase;PF05148:Hypothetical methyltransferase	GO:0006400//GO:0006480//GO:0008152	tRNA modification//N-terminal protein amino acid methylation//metabolic process	GO:0005730	nucleolus	GO:0008168//GO:0008176//GO:0008171	methyltransferase activity//tRNA (guanine-N7-)-methyltransferase activity//O-methyltransferase activity	At2g26200_1	Predicted methyltransferase
transcript_HQ_TX_pn_transcript37672/f2p0/2169	2169	82.4	1.1e-233	XP_001752876.1	SSADH [Physcomitrella patens]	--	--	--	--	K17761	SSADH	succinate-semialdehyde dehydrogenase, mitochondrial	1.2.1.24	ko00650; Metabolism; Carbohydrate metabolism; Butanoate metabolism | ko00250; Metabolism; Amino acid metabolism; Alanine, aspartate and glutamate metabolism	66.1	4.5e-193	sp|Q9SAK4|SSDH_ARATH	Succinate-semialdehyde dehydrogenase, mitochondrial OS=Arabidopsis thaliana GN=ALDH5F1 PE=1 SV=2	PF00171:Aldehyde dehydrogenase family	GO:0008152//GO:0055114	metabolic process//oxidation-reduction process	--	--	GO:0016491	oxidoreductase activity	At1g79440	Aldehyde dehydrogenase
transcript_HQ_TX_pn_transcript62959/f6p0/1503	1503	66.5	6.1e-50	XP_001761359.1	predicted protein [Physcomitrella patens]	100	1.37e-06	EF678539.1	Picea sitchensis clone WS02926_I21 unknown mRNA	-	-	-	-	-	--	--	--	--	PF05793:Transcription initiation factor IIF, alpha subunit (TFIIF-alpha);PF06375:Bovine leukaemia virus receptor (BLVR);PF09798:DNA damage checkpoint protein;PF09726:Transmembrane protein	GO:0015031//GO:0032968//GO:0006367//GO:0000077	protein transport//positive regulation of transcription elongation from RNA polymerase II promoter//transcription initiation from RNA polymerase II promoter//DNA damage checkpoint	GO:0005634//GO:0030123//GO:0016021	nucleus//AP-3 adaptor complex//integral component of membrane	GO:0003677	DNA binding	--	--
transcript_HQ_TX_pn_transcript55804/f21p0/1681	1681	81.6	7.2e-124	XP_001761832.1	predicted protein [Physcomitrella patens]	84.654	1.58e-165	XM_001770423.1	Physcomitrella patens subsp. patens predicted protein (PHYPADRAFT_188925) mRNA, complete cds	-	-	-	-	-	73.8	4.7e-89	sp|F4IUE7|COV1_ARATH	Protein CONTINUOUS VASCULAR RING 1 OS=Arabidopsis thaliana GN=COV1 PE=1 SV=2	--	--	--	--	--	--	--	--	--
transcript_HQ_TX_pn_transcript48808/f4p0/1871	1871	84.8	1.2e-228	XP_001755511.1	predicted protein [Physcomitrella patens]	--	--	--	--	-	-	-	-	-	30.3	1.4e-57	sp|Q88RC0|DAVD_PSEPK	Glutarate-semialdehyde dehydrogenase DavD OS=Pseudomonas putida (strain ATCC 47054 / DSM 6125 / NCIMB 11950 / KT2440) GN=davD PE=3 SV=1	PF00171:Aldehyde dehydrogenase family	GO:0008152//GO:0055114	metabolic process//oxidation-reduction process	--	--	GO:0016491	oxidoreductase activity	SPAC9E9.09c	Aldehyde dehydrogenase
transcript_HQ_TX_pn_transcript14669/f8p0/2921	2921	56.3	6.9e-106	XP_001760621.1	predicted protein [Physcomitrella patens]	77.454	7.77e-161	XM_001760569.1	Physcomitrella patens subsp. patens predicted protein (PHYPADRAFT_162478) mRNA, complete cds	-	-	-	-	-	34	9.8e-42	sp|Q84UQ3|C3H56_ORYSJ	Zinc finger CCCH domain-containing protein 56 OS=Oryza sativa subsp. japonica GN=Os08g0159800 PE=4 SV=1	PF00642:Zinc finger C-x8-C-x5-C-x3-H type (and similar)	--	--	--	--	GO:0046872	metal ion binding	At1g32360_1	CCCH-type Zn-finger protein
transcript_HQ_TX_pn_transcript12348/f2p0/3075	3075	74.7	2.9e-131	XP_001761043.1	predicted protein [Physcomitrella patens]	--	--	--	--	-	-	-	-	-	41.5	5.3e-54	sp|Q9FX99|Y1497_ARATH	Probable receptor-like protein kinase At1g49730 OS=Arabidopsis thaliana GN=At1g49730 PE=2 SV=1	PF00069:Protein kinase domain;PF07714:Protein tyrosine kinase	GO:0006468	protein phosphorylation	--	--	GO:0004672//GO:0005524	protein kinase activity//ATP binding	At3g19300	Serine/threonine protein kinase
transcript_HQ_TX_pn_transcript30775/f2p0/2353	2353	53.8	2.1e-57	XP_001769623.1	predicted protein [Physcomitrella patens]	--	--	--	--	-	-	-	-	-	32.5	3.5e-13	sp|Q8RXX9|ATL6_ARATH	E3 ubiquitin-protein ligase ATL6 OS=Arabidopsis thaliana GN=ATL6 PE=1 SV=2	PF12678:RING-H2 zinc finger domain;PF11789:Zinc-finger of the MIZ type in Nse subunit;PF14634:zinc-RING finger domain;PF12861:Anaphase-promoting complex subunit 11 RING-H2 finger;PF13639:Ring finger domain;PF00628:PHD-finger;PF03854:P-11 zinc finger;PF00097:Zinc finger, C3HC4 type (RING finger);PF17123:RING-like zinc finger	--	--	GO:0005680	anaphase-promoting complex	GO:0004842//GO:0046872//GO:0005515//GO:0008270//GO:0003723	ubiquitin-protein transferase activity//metal ion binding//protein binding//zinc ion binding//RNA binding	At3g05200	FOG: Predicted E3 ubiquitin ligase
transcript_HQ_TX_pn_transcript45316/f3p0/1978	1978	71.8	4.7e-167	XP_001757972.1	predicted protein [Physcomitrella patens]	78.325	3.6e-63	XM_001761870.1	Physcomitrella patens subsp. patens predicted protein (PHYPADRAFT_124817) mRNA, partial cds	-	-	-	-	-	23.9	1.1e-25	sp|Q9M0E1|FBL77_ARATH	F-box/LRR-repeat protein At4g29420 OS=Arabidopsis thaliana GN=At4g29420 PE=2 SV=1	PF04546:Sigma-70, non-essential region;PF15243:Anaphase-promoting complex subunit 15;PF12937:F-box-like;PF04147:Nop14-like family	GO:0090266//GO:0006355//GO:0006352	regulation of mitotic cell cycle spindle assembly checkpoint//regulation of transcription, DNA-templated//DNA-templated transcription, initiation	GO:0032040//GO:0005680	small-subunit processome//anaphase-promoting complex	GO:0003677//GO:0003700//GO:0005515//GO:0016987	DNA binding//transcription factor activity, sequence-specific DNA binding//protein binding//sigma factor activity	--	--
transcript_HQ_TX_pn_transcript12869/f3p0/3044	3044	54.1	4.4e-55	XP_001783710.1	predicted protein [Physcomitrella patens]	--	--	--	--	-	-	-	-	-	31.9	1.2e-21	sp|P25848|PHY1_CERPU	Light-sensor Protein kinase OS=Ceratodon purpureus GN=PHY1 PE=3 SV=3	PF00069:Protein kinase domain;PF06293:Lipopolysaccharide kinase (Kdo/WaaP) family;PF07714:Protein tyrosine kinase	GO:0006468	protein phosphorylation	GO:0016020	membrane	GO:0005524//GO:0016773//GO:0004672	ATP binding//phosphotransferase activity, alcohol group as acceptor//protein kinase activity	At1g62400	Tyrosine kinase specific for activated (GTP-bound) p21cdc42Hs
transcript_HQ_TX_pn_transcript51301/f13p0/1815	1815	89.8	2.7e-233	XP_001772764.1	predicted protein [Physcomitrella patens]	84.518	0	XM_001772712.1	Physcomitrella patens subsp. patens predicted protein (PHYPADRAFT_107354) mRNA, complete cds	K01641	E2.3.3.10	hydroxymethylglutaryl-CoA synthase	2.3.3.10	ko00650; Metabolism; Carbohydrate metabolism; Butanoate metabolism | ko00072; Metabolism; Lipid metabolism; Synthesis and degradation of ketone bodies | ko00280; Metabolism; Amino acid metabolism; Valine, leucine and isoleucine degradation | ko00900; Metabolism; Metabolism of terpenoids and polyketides; Terpenoid backbone biosynthesis	64.7	5.5e-168	sp|P54873|HMCS_ARATH	Hydroxymethylglutaryl-CoA synthase OS=Arabidopsis thaliana GN=HMGS PE=1 SV=2	PF08545:3-Oxoacyl-[acyl-carrier-protein (ACP)] synthase III;PF01154:Hydroxymethylglutaryl-coenzyme A synthase N terminal;PF08540:Hydroxymethylglutaryl-coenzyme A synthase C terminal	GO:0008299//GO:0006633	isoprenoid biosynthetic process//fatty acid biosynthetic process	--	--	GO:0004315//GO:0004421	3-oxoacyl-[acyl-carrier-protein] synthase activity//hydroxymethylglutaryl-CoA synthase activity	At4g11820	Hydroxymethylglutaryl-CoA synthase
transcript_HQ_TX_pn_transcript72186/f4p0/1058	1058	84.8	2e-95	XP_001753653.1	early light-induced protein 3 [Physcomitrella patens]	87.083	2.8e-151	XM_001783553.1	Physcomitrella patens subsp. patens early light-induced protein 5 (ELIP5) mRNA, complete cds	-	-	-	-	-	47.9	2.7e-21	sp|Q01931|DS22_CRAPL	Desiccation stress protein DSP-22, chloroplastic OS=Craterostigma plantagineum GN=DSP-22 PE=2 SV=1	--	--	--	--	--	--	--	--	--
transcript_HQ_TX_pn_transcript53599/f2p0/1788	1788	77	2.8e-94	XP_001779298.1	predicted protein [Physcomitrella patens]	--	--	--	--	K11294	NCL, NSR1	nucleolin	-	ko05130; Human Diseases; Infectious diseases: Bacterial; Pathogenic Escherichia coli infection	29.2	2.1e-18	sp|P19683|ROC4_NICSY	31 kDa ribonucleoprotein, chloroplastic OS=Nicotiana sylvestris PE=1 SV=1	PF16367:RNA recognition motif;PF00076:RNA recognition motif. (a.k.a. RRM, RBD, or RNP domain);PF00098:Zinc knuckle	--	--	--	--	GO:0008270//GO:0003676	zinc ion binding//nucleic acid binding	At3g55340	FOG: RRM domain
transcript_HQ_TX_pn_transcript34248/f2p0/2237	2237	65.3	4.1e-191	XP_001774876.1	predicted protein [Physcomitrella patens]	--	--	--	--	K03327	TC.MATE, SLC47A, norM, mdtK, dinF	multidrug resistance protein, MATE family	-	-	51.1	8.7e-123	sp|Q9FHB6|DTX16_ARATH	Protein DETOXIFICATION 16 OS=Arabidopsis thaliana GN=DTX16 PE=2 SV=1	PF01554:MatE	GO:0055085//GO:0006855	transmembrane transport//drug transmembrane transport	GO:0016020	membrane	GO:0015297//GO:0015238	antiporter activity//drug transmembrane transporter activity	At5g52450	Uncharacterized membrane protein, predicted efflux pump
transcript_HQ_TX_pn_transcript46629/f6p0/1948	1948	63.8	1.3e-129	XP_001780179.1	predicted protein [Physcomitrella patens]	--	--	--	--	-	-	-	-	-	43.2	1.3e-74	sp|Q8LEA8|EID1_ARATH	Phytochrome A-associated F-box protein OS=Arabidopsis thaliana GN=EID1 PE=1 SV=2	PF00646:F-box domain;PF12937:F-box-like	--	--	--	--	GO:0005515	protein binding	--	--
transcript_HQ_TX_pn_transcript52872/f2p0/1796	1796	74	4.8e-134	XP_001765415.1	predicted protein [Physcomitrella patens]	76.994	3.83e-132	XM_001765363.1	Physcomitrella patens subsp. patens predicted protein (PHYPADRAFT_212057) mRNA, complete cds	-	-	-	-	-	40.5	7.9e-34	sp|Q8LBL5|PRT1_ARATH	E3 ubiquitin-protein ligase PRT1 OS=Arabidopsis thaliana GN=PRT1 PE=2 SV=2	PF00569:Zinc finger, ZZ type;PF13639:Ring finger domain;PF00097:Zinc finger, C3HC4 type (RING finger);PF16685:zinc RING finger of MSL2;PF14634:zinc-RING finger domain	--	--	--	--	GO:0005515//GO:0046872//GO:0008270//GO:0061630	protein binding//metal ion binding//zinc ion binding//ubiquitin protein ligase activity	At3g24800_1	Predicted E3 ubiquitin ligase
transcript_HQ_TX_pn_transcript21023/f13p0/2568	2568	78.1	0	XP_001751229.1	predicted protein [Physcomitrella patens]	82.2	0	XM_001753929.1	Physcomitrella patens subsp. patens predicted protein (PHYPADRAFT_159278) mRNA, complete cds	-	-	-	-	-	--	--	--	--	PF13202:EF hand	--	--	--	--	GO:0005509	calcium ion binding	--	--
transcript_HQ_TX_pn_transcript73137/f7p0/1002	1002	77.1	4.4e-60	XP_001756904.1	predicted protein [Physcomitrella patens]	80.253	3.81e-75	XM_001756852.1	Physcomitrella patens subsp. patens predicted protein (PHYPADRAFT_160688) mRNA, complete cds	--	--	--	--	--	--	--	--	--	--	--	--	--	--	--	--	--	--
transcript_HQ_TX_pn_transcript71667/f2p0/1073	1074	93	1.2e-55	XP_001781153.1	predicted protein [Physcomitrella patens]	85.459	1.77e-123	XM_001781101.1	Physcomitrella patens subsp. patens predicted protein (PHYPADRAFT_171509) mRNA, complete cds	-	-	-	-	-	50.5	6.6e-20	sp|Q6DG43|UBTD2_DANRE	Ubiquitin domain-containing protein 2 OS=Danio rerio GN=ubtd2 PE=2 SV=1	PF16455:Ubiquitin-binding domain	--	--	--	--	GO:0043130	ubiquitin binding	At1g53400	Uncharacterized conserved protein
transcript_HQ_TX_pn_transcript888/f5p0/4806	4806	86.4	0	XP_001771305.1	predicted protein [Physcomitrella patens]	82.661	0	XM_001758135.1	Physcomitrella patens subsp. patens predicted protein (PHYPADRAFT_205967) mRNA, complete cds	K01530	E3.6.3.1	phospholipid-translocating ATPase	3.6.3.1	-	62.1	0	sp|Q9LNQ4|ALA4_ARATH	Probable phospholipid-transporting ATPase 4 OS=Arabidopsis thaliana GN=ALA4 PE=3 SV=2	PF00122:E1-E2 ATPase	--	--	--	--	GO:0000166//GO:0046872	nucleotide binding//metal ion binding	At1g17500	P-type ATPase
transcript_HQ_TX_pn_transcript3030/f2p0/4045	4043	50.3	1.6e-28	OAE19382.1	hypothetical protein AXG93_698s1110 [Marchantia polymorpha subsp. polymorpha]	--	--	--	--	K09286	EREBP	EREBP-like factor	-	-	78.3	3e-20	sp|Q6J9S1|RA211_ARATH	Ethylene-responsive transcription factor RAP2-11 OS=Arabidopsis thaliana GN=RAP2-11 PE=2 SV=1	PF00847:AP2 domain	GO:0006355	regulation of transcription, DNA-templated	--	--	GO:0003700	transcription factor activity, sequence-specific DNA binding	--	--
transcript_HQ_TX_pn_transcript35987/f2p0/2210	2210	52.8	1.4e-87	OAE28968.1	hypothetical protein AXG93_2960s1470 [Marchantia polymorpha subsp. polymorpha]	--	--	--	--	K14379	ACP5	tartrate-resistant acid phosphatase type 5	3.1.3.2	ko00740; Metabolism; Metabolism of cofactors and vitamins; Riboflavin metabolism | ko04142; Cellular Processes; Transport and catabolism; Lysosome | ko04380; Organismal Systems; Development; Osteoclast differentiation | ko05323; Human Diseases; Immune diseases; Rheumatoid arthritis	35.3	9.7e-34	sp|P13686|PPA5_HUMAN	Tartrate-resistant acid phosphatase type 5 OS=Homo sapiens GN=ACP5 PE=1 SV=3	PF00149:Calcineurin-like phosphoesterase	--	--	--	--	GO:0016787	hydrolase activity	Hs4501873	Purple (tartrate-resistant) acid phosphatase
transcript_HQ_TX_pn_transcript45250/f2p0/1963	1962	59.6	2e-85	XP_001758438.1	predicted protein [Physcomitrella patens]	--	--	--	--	-	-	-	-	-	29.3	9.6e-33	sp|Q9SV07|ASAT1_ARATH	Acyl-CoA--sterol O-acyltransferase 1 OS=Arabidopsis thaliana GN=ASAT1 PE=1 SV=1	--	--	--	--	--	--	--	--	--
transcript_HQ_TX_pn_transcript43967/f3p0/2020	2020	75.7	1.5e-128	XP_001766633.1	predicted protein [Physcomitrella patens]	75.776	3.08e-09	XM_014647583.1	PREDICTED: Vigna radiata var. radiata purple acid phosphatase 3-like (LOC106763382), mRNA	K14379	ACP5	tartrate-resistant acid phosphatase type 5	3.1.3.2	ko00740; Metabolism; Metabolism of cofactors and vitamins; Riboflavin metabolism | ko04142; Cellular Processes; Transport and catabolism; Lysosome | ko04380; Organismal Systems; Development; Osteoclast differentiation | ko05323; Human Diseases; Immune diseases; Rheumatoid arthritis	48	7.2e-84	sp|Q8H129|PPA3_ARATH	Purple acid phosphatase 3 OS=Arabidopsis thaliana GN=PAP3 PE=2 SV=1	PF00149:Calcineurin-like phosphoesterase	--	--	--	--	GO:0016787	hydrolase activity	At1g14700	Purple (tartrate-resistant) acid phosphatase
transcript_HQ_TX_pn_transcript57534/f9p0/1671	1671	75	5.3e-127	XP_001759133.1	predicted protein [Physcomitrella patens]	--	--	--	--	-	-	-	-	-	--	--	--	--	--	--	--	--	--	--	--	At5g05210	Uncharacterized conserved protein
transcript_HQ_TX_pn_transcript8591/f2p0/3346	3346	69.9	4.8e-111	XP_001781141.1	predicted protein [Physcomitrella patens]	--	--	--	--	-	-	-	-	-	34.3	3.3e-33	sp|P25848|PHY1_CERPU	Light-sensor Protein kinase OS=Ceratodon purpureus GN=PHY1 PE=3 SV=3	PF00069:Protein kinase domain;PF06293:Lipopolysaccharide kinase (Kdo/WaaP) family;PF07714:Protein tyrosine kinase	GO:0006468	protein phosphorylation	GO:0016020	membrane	GO:0005524//GO:0004672//GO:0016773	ATP binding//protein kinase activity//phosphotransferase activity, alcohol group as acceptor	At1g64300	Tyrosine kinase specific for activated (GTP-bound) p21cdc42Hs
transcript_HQ_TX_pn_transcript71343/f2p0/1135	1135	58.5	1.4e-70	XP_001765013.1	predicted protein [Physcomitrella patens]	--	--	--	--	--	--	--	--	--	--	--	--	--	--	--	--	--	--	--	--	--	--
transcript_HQ_TX_pn_transcript44686/f7p0/2031	2031	86.5	6.7e-225	XP_001752981.1	predicted protein [Physcomitrella patens]	83.526	0	XM_001752929.1	Physcomitrella patens subsp. patens predicted protein (PHYPADRAFT_113780) mRNA, complete cds	K01176	AMY, amyA, malS	alpha-amylase	3.2.1.1	ko00500; Metabolism; Carbohydrate metabolism; Starch and sucrose metabolism | ko04973; Organismal Systems; Digestive system; Carbohydrate digestion and absorption	62.5	3e-162	sp|Q8LFG1|AMY2_ARATH	Probable alpha-amylase 2 OS=Arabidopsis thaliana GN=AMY2 PE=2 SV=1	PF00128:Alpha amylase, catalytic domain;PF02324:Glycosyl hydrolase family 70;PF07821:Alpha-amylase C-terminal beta-sheet domain	GO:0009250//GO:0005975	glucan biosynthetic process//carbohydrate metabolic process	--	--	GO:0046527//GO:0005509//GO:0004556//GO:0003824	glucosyltransferase activity//calcium ion binding//alpha-amylase activity//catalytic activity	At1g76130	Alpha-amylase
transcript_HQ_TX_pn_transcript28111/f7p0/2352	2352	59.1	1.9e-146	XP_001764814.1	predicted protein [Physcomitrella patens]	79.972	1.07e-138	XM_001771792.1	Physcomitrella patens subsp. patens predicted protein (PHYPADRAFT_167315) mRNA, complete cds	-	-	-	-	-	42.7	7.5e-08	sp|Q940T9|COL4_ARATH	Zinc finger protein CONSTANS-LIKE 4 OS=Arabidopsis thaliana GN=COL4 PE=2 SV=2	PF06203:CCT motif	--	--	--	--	GO:0005515	protein binding	--	--
transcript_HQ_TX_pn_transcript41712/f27p0/1958	1958	83.5	2.3e-251	XP_001764494.1	predicted protein [Physcomitrella patens]	82.579	0	XM_001764442.1	Physcomitrella patens subsp. patens predicted protein (PHYPADRAFT_127975) mRNA, complete cds	K01580	E4.1.1.15, gadB, gadA, GAD	glutamate decarboxylase	4.1.1.15	ko00650; Metabolism; Carbohydrate metabolism; Butanoate metabolism | ko00250; Metabolism; Amino acid metabolism; Alanine, aspartate and glutamate metabolism | ko00410; Metabolism; Metabolism of other amino acids; beta-Alanine metabolism | ko00430; Metabolism; Metabolism of other amino acids; Taurine and hypotaurine metabolism | ko02024; Cellular Processes; Cellular community - prokaryotes; Quorum…	72.9	7.4e-211	sp|Q07346|DCE_PETHY	Glutamate decarboxylase OS=Petunia hybrida GN=GAD PE=1 SV=1	PF00282:Pyridoxal-dependent decarboxylase conserved domain	GO:0019752	carboxylic acid metabolic process	--	--	GO:0016831//GO:0030170	carboxy-lyase activity//pyridoxal phosphate binding	At2g02010	Glutamate decarboxylase/sphingosine phosphate lyase
transcript_HQ_TX_pn_transcript56475/f2p0/1709	1709	78.8	4e-29	XP_001762652.1	predicted protein [Physcomitrella patens]	--	--	--	--	-	-	-	-	-	41.2	1.9e-08	sp|O65695|SAU50_ARATH	Auxin-responsive protein SAUR50 OS=Arabidopsis thaliana GN=SAUR50 PE=1 SV=1	PF02519:Auxin responsive protein	GO:0009733	response to auxin	--	--	--	--	--	--
transcript_HQ_TX_pn_transcript70083/f2p0/1140	1139	71.5	6.6e-81	XP_001778087.1	predicted protein [Physcomitrella patens]	80.731	1.13e-120	XM_001778035.1	Physcomitrella patens subsp. patens predicted protein (PHYPADRAFT_145687) mRNA, complete cds	K19730	ATG101	autophagy-related protein 101	-	ko04140; Cellular Processes; Transport and catabolism; Autophagy - animal | ko04211; Organismal Systems; Aging; Longevity regulating pathway	53.9	7.4e-62	sp|F4K265|AT101_ARATH	Autophagy-related protein 101 OS=Arabidopsis thaliana GN=ATG101 PE=1 SV=1	PF07855:Protein of unknown function (DUF1649)	GO:0006914	autophagy	--	--	--	--	At5g66930	Uncharacterized conserved protein
transcript_HQ_TX_pn_transcript52648/f3p0/1886	1886	45.4	2.2e-105	XP_001756985.1	predicted protein [Physcomitrella patens]	--	--	--	--	-	-	-	-	-	25.2	1.4e-12	sp|Q0JCU7|ZEP_ORYSJ	Zeaxanthin epoxidase, chloroplastic OS=Oryza sativa subsp. japonica GN=ZEP PE=2 SV=1	PF12831:FAD dependent oxidoreductase;PF08491:Squalene epoxidase;PF07992:Pyridine nucleotide-disulphide oxidoreductase;PF01134:Glucose inhibited division protein A;PF01266:FAD dependent oxidoreductase;PF00070:Pyridine nucleotide-disulphide oxidoreductase;PF01494:FAD binding domain	GO:0008033//GO:0055114	tRNA processing//oxidation-reduction process	GO:0016021	integral component of membrane	GO:0071949//GO:0004506//GO:0016491//GO:0050660	FAD binding//squalene monooxygenase activity//oxidoreductase activity//flavin adenine dinucleotide binding	At5g67030	Kynurenine 3-monooxygenase and related flavoprotein monooxygenases
transcript_HQ_TX_pn_transcript23261/f3p0/2561	2560	90.5	2.8e-268	XP_001768176.1	predicted protein [Physcomitrella patens]	--	--	--	--	K07562	NMD3	nonsense-mediated mRNA decay protein 3	-	ko03013; Genetic Information Processing; Translation; RNA transport | ko03008; Genetic Information Processing; Translation; Ribosome biogenesis in eukaryotes	49.1	4.6e-136	sp|Q6P2Z6|NMD3_XENTR	60S ribosomal export protein NMD3 OS=Xenopus tropicalis GN=nmd3 PE=2 SV=1	PF00181:Ribosomal Proteins L2, RNA binding domain	GO:0006412	translation	GO:0005622//GO:0005840	intracellular//ribosome	GO:0003735	structural constituent of ribosome	At2g03820	NMD protein affecting ribosome stability and mRNA decay
transcript_HQ_TX_pn_transcript44339/f2p0/2018	2014	61	3e-129	XP_001783427.1	predicted protein [Physcomitrella patens]	--	--	--	--	K03875	SKP2, FBXL1	F-box and leucine-rich repeat protein 1 (S-phase kinase-associated protein 2)	-	ko04120; Genetic Information Processing; Folding, sorting and degradation; Ubiquitin mediated proteolysis | ko04068; Environmental Information Processing; Signal transduction; FoxO signaling pathway | ko04150; Environmental Information Processing; Signal transduction; mTOR signaling pathway | ko04110; Cellular Processes; Cell growth and death; Cell cycle | ko05200; Human Diseases; Cancers: Overvi…	47.6	3.5e-70	sp|Q9LPL4|SKP2A_ARATH	F-box protein SKP2A OS=Arabidopsis thaliana GN=SKP2A PE=1 SV=1	PF13516:Leucine Rich repeat;PF12937:F-box-like;PF00646:F-box domain;PF00560:Leucine Rich Repeat	--	--	--	--	GO:0005515	protein binding	At1g21410	Leucine rich repeat proteins, some proteins contain F-box
transcript_HQ_TX_pn_transcript53289/f2p0/1792	1792	57.7	2.6e-111	XP_001761358.1	transcription factor WRKY1 [Physcomitrella patens]	83.255	1.11e-102	XM_001773443.1	Physcomitrella patens subsp. patens transcription factor WRKY9 (WRKY9) mRNA, complete cds	-	-	-	-	-	60.2	5.3e-38	sp|O22176|WRK15_ARATH	Probable WRKY transcription factor 15 OS=Arabidopsis thaliana GN=WRKY15 PE=2 SV=1	PF03106:WRKY DNA -binding domain	GO:0006355	regulation of transcription, DNA-templated	--	--	GO:0043565//GO:0003700	sequence-specific DNA binding//transcription factor activity, sequence-specific DNA binding	--	--
transcript_HQ_TX_pn_transcript49687/f2p0/1861	1861	44.3	2.1e-23	XP_001782419.1	predicted protein [Physcomitrella patens]	--	--	--	--	-	-	-	-	-	39.4	4.7e-13	sp|P25848|PHY1_CERPU	Light-sensor Protein kinase OS=Ceratodon purpureus GN=PHY1 PE=3 SV=3	--	--	--	--	--	--	--	At1g64300	Tyrosine kinase specific for activated (GTP-bound) p21cdc42Hs
transcript_HQ_TX_pn_transcript16572/f4p0/2798	2798	67.7	1.5e-243	XP_001779706.1	predicted protein [Physcomitrella patens]	--	--	--	--	-	-	-	-	-	--	--	--	--	--	--	--	--	--	--	--	--	--
transcript_HQ_TX_pn_transcript56061/f5p0/1722	1722	39.6	1.4e-18	XP_001781087.1	predicted protein [Physcomitrella patens]	--	--	--	--	-	-	-	-	-	--	--	--	--	PF07213:DAP10 membrane protein;PF00957:Synaptobrevin;PF15347:Phosphoprotein associated with glycosphingolipid-enriched	GO:0035556//GO:0016192//GO:0014068//GO:0050776//GO:0050868	intracellular signal transduction//vesicle-mediated transport//positive regulation of phosphatidylinositol 3-kinase signaling//regulation of immune response//negative regulation of T cell activation	GO:0016020//GO:0045121//GO:0016021//GO:0005886	membrane//membrane raft//integral component of membrane//plasma membrane	GO:0043548//GO:0005102	phosphatidylinositol 3-kinase binding//receptor binding	--	--
transcript_HQ_TX_pn_transcript19239/f2p0/2737	2737	78.5	7.5e-155	XP_001782480.1	predicted protein [Physcomitrella patens]	82.155	0	XM_001782428.1	Physcomitrella patens subsp. patens predicted protein (PHYPADRAFT_198566) mRNA, complete cds	K13091	RBM39, RNPC2	RNA-binding protein 39	-	-	52.5	1.9e-39	sp|Q8VH51|RBM39_MOUSE	RNA-binding protein 39 OS=Mus musculus GN=Rbm39 PE=1 SV=2	PF00076:RNA recognition motif. (a.k.a. RRM, RBD, or RNP domain);PF16367:RNA recognition motif;PF02412:Thrombospondin type 3 repeat	GO:0007155	cell adhesion	--	--	GO:0003676//GO:0005509	nucleic acid binding//calcium ion binding	At5g09880	Transcriptional coactivator CAPER (RRM superfamily)
transcript_HQ_TX_pn_transcript8385/f2p0/3362	3361	34.8	5.6e-51	P25848.3	RecName: Full=Light-sensor Protein kinase; Includes: RecName: Full=Phytochrome; Includes: RecName: Full=Protein kinase	--	--	--	--	-	-	-	-	-	34.8	5.4e-52	sp|P25848|PHY1_CERPU	Light-sensor Protein kinase OS=Ceratodon purpureus GN=PHY1 PE=3 SV=3	--	--	--	--	--	--	--	At1g64300	Tyrosine kinase specific for activated (GTP-bound) p21cdc42Hs
transcript_HQ_TX_pn_transcript7511/f6p0/3419	3419	76.2	0	XP_001781920.1	predicted protein [Physcomitrella patens]	81.717	0	XM_001781868.1	Physcomitrella patens subsp. patens predicted protein (PHYPADRAFT_171856) mRNA, complete cds	-	-	-	-	-	--	--	--	--	PF00514:Armadillo/beta-catenin-like repeat	--	--	--	--	GO:0005515	protein binding	At1g61030	Sister chromatid cohesion protein
transcript_HQ_TX_pn_transcript40495/f3p0/2105	2105	42	7.7e-75	XP_001757085.1	predicted protein [Physcomitrella patens]	83.41	3.92e-48	XM_001757033.1	Physcomitrella patens subsp. patens predicted protein (PHYPADRAFT_118932) mRNA, complete cds	-	-	-	-	-	45.7	6.4e-27	sp|Q9SSE5|COL9_ARATH	Zinc finger protein CONSTANS-LIKE 9 OS=Arabidopsis thaliana GN=COL9 PE=2 SV=1	PF06203:CCT motif;PF00643:B-box zinc finger	--	--	GO:0005622	intracellular	GO:0005515//GO:0008270	protein binding//zinc ion binding	--	--
transcript_HQ_TX_pn_transcript56443/f2p0/1627	1628	83.9	2e-155	XP_001784490.1	predicted protein [Physcomitrella patens]	--	--	--	--	K18980	EO, FaQR	2-methylene-furan-3-one reductase	1.3.1.105	-	62.4	9.5e-119	sp|K4BW79|ENOX_SOLLC	2-methylene-furan-3-one reductase OS=Solanum lycopersicum GN=EO PE=1 SV=1	PF08240:Alcohol dehydrogenase GroES-like domain;PF00107:Zinc-binding dehydrogenase	GO:0055114	oxidation-reduction process	--	--	--	--	At1g23740	Zinc-binding oxidoreductase
transcript_HQ_TX_pn_transcript40421/f24p0/2083	2083	68.6	4.9e-191	XP_001766981.1	predicted protein [Physcomitrella patens]	71.012	8.7e-20	XM_019297660.1	PREDICTED: Ipomoea nil sucrose transport protein SUC4 (LOC109149720), transcript variant X3, mRNA	K15378	SLC45A1_2_4	solute carrier family 45, member 1/2/4	-	-	48.6	6.8e-130	sp|Q9FE59|SUC4_ARATH	Sucrose transport protein SUC4 OS=Arabidopsis thaliana GN=SUC4 PE=1 SV=2	PF06305:Protein of unknown function (DUF1049);PF00854:POT family;PF02990:Endomembrane protein 70	GO:0006810	transport	GO:0016021//GO:0016020//GO:0005887	integral component of membrane//membrane//integral component of plasma membrane	GO:0005215	transporter activity	At1g09960	Sucrose transporter and related proteins
transcript_HQ_TX_pn_transcript25407/f3p0/2601	2601	32	1.9e-35	KMZ72708.1	putative WRKY transcription factor 42 [Zostera marina]	86.335	2.95e-40	XM_001761253.1	Physcomitrella patens subsp. patens transcription factor WRKY13 (WRKY13) mRNA, partial cds	-	-	-	-	-	88.9	2.9e-29	sp|Q9C9F0|WRKY9_ARATH	Probable WRKY transcription factor 9 OS=Arabidopsis thaliana GN=WRKY9 PE=2 SV=1	PF03106:WRKY DNA -binding domain	GO:0006355	regulation of transcription, DNA-templated	--	--	GO:0003700//GO:0043565	transcription factor activity, sequence-specific DNA binding//sequence-specific DNA binding	--	--
transcript_HQ_TX_pn_transcript71658/f6p0/1105	1105	47.1	1.4e-56	XP_001752423.1	predicted protein [Physcomitrella patens]	--	--	--	--	-	-	-	-	-	--	--	--	--	--	--	--	--	--	--	--	--	--
transcript_HQ_TX_pn_transcript12441/f3p0/3048	3047	78.9	4.8e-94	KZN05383.1	hypothetical protein DCAR_006220 [Daucus carota subsp. sativus]	86.792	1.78e-147	XM_001781723.1	Physcomitrella patens subsp. patens predicted protein (PHYPADRAFT_96766) mRNA, complete cds	K12812	UAP56, BAT1, SUB2	ATP-dependent RNA helicase UAP56/SUB2	3.6.4.13	ko03040; Genetic Information Processing; Transcription; Spliceosome | ko03013; Genetic Information Processing; Translation; RNA transport | ko03015; Genetic Information Processing; Translation; mRNA surveillance pathway | ko05164; Human Diseases; Infectious diseases: Viral; Influenza A	95.7	1.4e-83	sp|Q56XG6|RH15_ARATH	DEAD-box ATP-dependent RNA helicase 15 OS=Arabidopsis thaliana GN=RH15 PE=1 SV=3	--	--	--	--	--	--	--	At5g11200	ATP-dependent RNA helicase
transcript_HQ_TX_pn_transcript42558/f6p0/2046	2046	42.9	1.9e-62	XP_001755548.1	predicted protein [Physcomitrella patens]	--	--	--	--	-	-	-	-	-	--	--	--	--	PF10440:Ubiquitin-binding WIYLD domain	--	--	--	--	GO:0018024	histone-lysine N-methyltransferase activity	--	--
transcript_HQ_TX_pn_transcript43756/f3p0/2008	2008	50.1	7.1e-78	XP_001785910.1	predicted protein [Physcomitrella patens]	77.114	1.08e-18	XM_001779083.1	Physcomitrella patens subsp. patens predicted protein (PHYPADRAFT_60493) mRNA, complete cds	-	-	-	-	-	35.4	1.3e-29	sp|Q9SYM2|BBX22_ARATH	B-box zinc finger protein 22 OS=Arabidopsis thaliana GN=BBX22 PE=1 SV=2	PF00130:Phorbol esters/diacylglycerol binding domain (C1 domain);PF00643:B-box zinc finger	GO:0035556	intracellular signal transduction	GO:0005622	intracellular	GO:0008270	zinc ion binding	--	--
transcript_HQ_TX_pn_transcript52026/f2p0/1781	1780	76.1	1.4e-93	XP_001779298.1	predicted protein [Physcomitrella patens]	--	--	--	--	K11294	NCL, NSR1	nucleolin	-	ko05130; Human Diseases; Infectious diseases: Bacterial; Pathogenic Escherichia coli infection	30.1	2.1e-15	sp|Q9FGS0|CP31B_ARATH	RNA-binding protein CP31B, chloroplastic OS=Arabidopsis thaliana GN=CP31B PE=1 SV=1	PF00098:Zinc knuckle;PF00076:RNA recognition motif. (a.k.a. RRM, RBD, or RNP domain);PF16367:RNA recognition motif	--	--	--	--	GO:0003676//GO:0008270	nucleic acid binding//zinc ion binding	At3g55340	FOG: RRM domain
transcript_HQ_TX_pn_transcript8263/f2p0/3258	3257	73.3	6.4e-246	XP_001764487.1	predicted protein [Physcomitrella patens]	80.418	0	XM_001764435.1	Physcomitrella patens subsp. patens predicted protein (PHYPADRAFT_77922) mRNA, complete cds	K05391	CNGF	cyclic nucleotide gated channel, other eukaryote	-	ko04626; Organismal Systems; Environmental adaptation; Plant-pathogen interaction	50.5	9.6e-163	sp|A0A072VMJ3|CN15C_MEDTR	Protein CNGC15c OS=Medicago truncatula GN=CNGC15C PE=1 SV=1	PF00612:IQ calmodulin-binding motif;PF00520:Ion transport protein	GO:0006811//GO:0055085	ion transport//transmembrane transport	GO:0016020	membrane	GO:0005216//GO:0005515	ion channel activity//protein binding	At2g28260	K+-channel ERG and related proteins, contain PAS/PAC sensor domain
transcript_HQ_TX_pn_transcript70920/f2p0/1146	1147	--	--	--	--	--	--	--	--	--	--	--	--	--	--	--	--	--	--	--	--	--	--	--	--	--	--
transcript_HQ_TX_pn_transcript49078/f3p0/1900	1900	36.5	1.8e-46	XP_001765334.1	predicted protein [Physcomitrella patens]	--	--	--	--	-	-	-	-	-	43.2	2.5e-09	sp|Q03968|LEA3_WHEAT	Late embryogenesis abundant protein, group 3 OS=Triticum aestivum PE=2 SV=1	--	--	--	--	--	--	--	--	--
transcript_HQ_TX_pn_transcript68701/f11p0/1264	1264	59.4	2.5e-65	XP_001764210.1	predicted protein [Physcomitrella patens]	81.818	5.27e-15	XM_010906518.2	PREDICTED: Elaeis guineensis probable glutathione S-transferase GSTF1 (LOC105032151), mRNA	K00799	GST, gst	glutathione S-transferase	2.5.1.18	ko00480; Metabolism; Metabolism of other amino acids; Glutathione metabolism | ko00980; Metabolism; Xenobiotics biodegradation and metabolism; Metabolism of xenobiotics by cytochrome P450 | ko00982; Metabolism; Xenobiotics biodegradation and metabolism; Drug metabolism - cytochrome P450 | ko05204; Human Diseases; Cancers: Overview; Chemical carcinogenesis | ko05418; Human Diseases; Cardiovascular…	53.8	9.8e-55	sp|P42761|GSTFA_ARATH	Glutathione S-transferase F10 OS=Arabidopsis thaliana GN=GSTF10 PE=1 SV=3	PF13409:Glutathione S-transferase, N-terminal domain;PF13417:Glutathione S-transferase, N-terminal domain;PF02798:Glutathione S-transferase, N-terminal domain	--	--	--	--	GO:0005515	protein binding	At2g30870	Glutathione S-transferase
transcript_HQ_TX_pn_transcript27967/f2p0/2435	2433	67.8	1.3e-206	ADF28535.1	cinnamate 4-hydroxylase [Physcomitrella patens]	--	--	--	--	K00487	CYP73A	trans-cinnamate 4-monooxygenase	1.14.13.11	ko01220; Metabolism; Global and overview maps; Degradation of aromatic compounds | ko00360; Metabolism; Amino acid metabolism; Phenylalanine metabolism | ko00130; Metabolism; Metabolism of cofactors and vitamins; Ubiquinone and other terpenoid-quinone biosynthesis | ko00940; Metabolism; Biosynthesis of other secondary metabolites; Phenylpropanoid biosynthesis | ko00945; Metabolism; Biosynthesis o…	60.6	4.6e-178	sp|Q43054|TCMO_POPKI	Trans-cinnamate 4-monooxygenase OS=Populus kitakamiensis GN=CYP73A16 PE=2 SV=1	PF00067:Cytochrome P450	GO:0055114	oxidation-reduction process	--	--	GO:0016705//GO:0005506//GO:0020037	oxidoreductase activity, acting on paired donors, with incorporation or reduction of molecular oxygen//iron ion binding//heme binding	At2g30490	Cytochrome P450 CYP2 subfamily
transcript_HQ_TX_pn_transcript40002/f13p0/2034	2034	31.2	2.7e-16	XP_001770325.1	predicted protein [Physcomitrella patens]	--	--	--	--	-	-	-	-	-	--	--	--	--	--	--	--	--	--	--	--	--	--
transcript_HQ_TX_pn_transcript56345/f13p0/1684	1684	80.9	7.3e-185	XP_001785708.1	predicted protein [Physcomitrella patens]	--	--	--	--	K00121	frmA, ADH5, adhC	S-(hydroxymethyl)glutathione dehydrogenase / alcohol dehydrogenase [EC:1.1.1.284 1.1.1.1]	1.1.1.284,1.1.1.1	ko01200; Metabolism; Global and overview maps; Carbon metabolism | ko01220; Metabolism; Global and overview maps; Degradation of aromatic compounds | ko00010; Metabolism; Carbohydrate metabolism; Glycolysis / Gluconeogenesis | ko00680; Metabolism; Energy metabolism; Methane metabolism | ko00071; Metabolism; Lipid metabolism; Fatty acid degradation | ko00350; Metabolism; Amino acid metabolism; Tyr…	52.7	4e-112	sp|Q96533|ADHX_ARATH	Alcohol dehydrogenase class-3 OS=Arabidopsis thaliana GN=ADH2 PE=1 SV=2	PF08240:Alcohol dehydrogenase GroES-like domain;PF02826:D-isomer specific 2-hydroxyacid dehydrogenase, NAD binding domain;PF00107:Zinc-binding dehydrogenase	GO:0055114	oxidation-reduction process	--	--	GO:0051287	NAD binding	At5g43940	Alcohol dehydrogenase, class III
transcript_HQ_TX_pn_transcript71918/f2p0/1088	1088	86.8	5.8e-18	XP_001756584.1	predicted protein [Physcomitrella patens]	--	--	--	--	-	-	-	-	-	--	--	--	--	--	--	--	--	--	--	--	--	--
transcript_HQ_TX_pn_transcript58941/f8p0/1626	1626	89.4	5e-191	XP_001770945.1	predicted protein [Physcomitrella patens]	85.703	0	XM_001770893.1	Physcomitrella patens subsp. patens predicted protein (PHYPADRAFT_189316) mRNA, complete cds	K03039	PSMD13, RPN9	26S proteasome regulatory subunit N9	-	ko03050; Genetic Information Processing; Folding, sorting and degradation; Proteasome | ko05169; Human Diseases; Infectious diseases: Viral; Epstein-Barr virus infection	70.6	1.1e-156	sp|Q8GYA6|PS13B_ARATH	26S proteasome non-ATPase regulatory subunit 13 homolog B OS=Arabidopsis thaliana GN=RPN9B PE=1 SV=1	PF01399:PCI domain	--	--	--	--	GO:0005515	protein binding	At5g45620	26S proteasome regulatory complex, subunit RPN9/PSMD13
transcript_HQ_TX_pn_transcript26107/f8p0/2485	2485	57.2	1.5e-165	XP_001770788.1	predicted protein [Physcomitrella patens]	--	--	--	--	K04121	E4.2.3.19	ent-kaurene synthase	4.2.3.19	ko00904; Metabolism; Metabolism of terpenoids and polyketides; Diterpenoid biosynthesis	34.9	2.4e-89	sp|Q947C4|TPSD1_GINBI	Bifunctional levopimaradiene synthase, chloroplastic OS=Ginkgo biloba GN=LPS PE=1 SV=1	PF01397:Terpene synthase, N-terminal domain;PF03936:Terpene synthase family, metal binding domain;PF02024:Leptin	GO:0008152//GO:0007165	metabolic process//signal transduction	GO:0005576	extracellular region	GO:0016829//GO:0010333//GO:0005179//GO:0000287	lyase activity//terpene synthase activity//hormone activity//magnesium ion binding	--	--
transcript_HQ_TX_pn_transcript51435/f3p0/1838	1838	42.9	5.6e-21	XP_001782419.1	predicted protein [Physcomitrella patens]	--	--	--	--	-	-	-	-	-	39	3e-12	sp|P25848|PHY1_CERPU	Light-sensor Protein kinase OS=Ceratodon purpureus GN=PHY1 PE=3 SV=3	PF00069:Protein kinase domain;PF07714:Protein tyrosine kinase	GO:0006468	protein phosphorylation	--	--	GO:0005524//GO:0004672	ATP binding//protein kinase activity	At1g64300	Tyrosine kinase specific for activated (GTP-bound) p21cdc42Hs
transcript_HQ_TX_pn_transcript2145/f6p0/4207	4207	91.7	0	XP_001757611.1	argonaute family member [Physcomitrella patens]	83.166	0	XM_001757559.1	Physcomitrella patens subsp. patens argonaute family member (PpAGO1a) mRNA, complete cds	K11593	ELF2C, AGO	eukaryotic translation initiation factor 2C	-	-	76.9	0	sp|Q6EU14|AGO1A_ORYSJ	Protein argonaute 1A OS=Oryza sativa subsp. japonica GN=AGO1A PE=2 SV=1	PF02170:PAZ domain;PF02171:Piwi domain	--	--	--	--	GO:0003676//GO:0005515	nucleic acid binding//protein binding	At1g48410	Translation initiation factor 2C (eIF-2C) and related proteins
transcript_HQ_TX_pn_transcript12597/f2p0/3031	3030	55.8	3.4e-164	XP_001784437.1	predicted protein [Physcomitrella patens]	--	--	--	--	-	-	-	-	-	47.6	5.8e-146	sp|P80065|INVB_DAUCA	Beta-fructofuranosidase, soluble isoenzyme I OS=Daucus carota GN=INV*DC4 PE=1 SV=2	--	--	--	--	--	--	--	At1g12240	Beta-fructofuranosidase (invertase)
transcript_HQ_TX_pn_transcript22173/f2p0/2627	2627	65.5	4.7e-223	XP_001761617.1	TLP3A TIR1-like auxin receptor protein [Physcomitrella patens]	76.082	0	XM_001775120.1	Physcomitrella patens subsp. patens TLP3B TIR1-like auxin receptor protein (TLP3B) mRNA, partial cds	K13463	COI-1	coronatine-insensitive protein 1	-	ko04075; Environmental Information Processing; Signal transduction; Plant hormone signal transduction	36.5	8.4e-101	sp|Q60EH4|COI1B_ORYSJ	Coronatine-insensitive protein homolog 1b OS=Oryza sativa subsp. japonica GN=COI1B PE=1 SV=1	PF00646:F-box domain;PF12937:F-box-like	--	--	--	--	GO:0005515	protein binding	At2g39940	Leucine rich repeat proteins, some proteins contain F-box
transcript_HQ_TX_pn_transcript64801/f4p0/1445	1445	74.6	2.6e-154	XP_001764592.1	predicted protein [Physcomitrella patens]	--	--	--	--	-	-	-	-	-	45.8	5.5e-86	sp|O23470|GDL64_ARATH	GDSL esterase/lipase At4g16230 OS=Arabidopsis thaliana GN=At4g16230 PE=3 SV=2	PF00657:GDSL-like Lipase/Acylhydrolase	--	--	--	--	GO:0016788	hydrolase activity, acting on ester bonds	--	--
transcript_HQ_TX_pn_transcript24244/f6p0/2546	2546	76.4	5.8e-303	XP_001776297.1	predicted protein [Physcomitrella patens]	84.551	0	XM_001776245.1	Physcomitrella patens subsp. patens predicted protein (PHYPADRAFT_220952) mRNA, complete cds	-	-	-	-	-	50.4	1.4e-140	sp|A1K5T6|Y1574_AZOSB	UPF0061 protein azo1574 OS=Azoarcus sp. (strain BH72) GN=azo1574 PE=3 SV=1	--	--	--	--	--	--	--	At5g13040	Uncharacterized conserved protein (YdiU family)
transcript_HQ_TX_pn_transcript18924/f2p0/2692	2692	43.7	5.8e-160	XP_011086636.1	PREDICTED: uncharacterized protein LOC105168306 isoform X2 [Sesamum indicum]	82.109	0	XM_001756144.1	Physcomitrella patens subsp. patens predicted protein (PHYPADRAFT_117686) mRNA, complete cds	-	-	-	-	-	42.1	4.1e-127	sp|F4I6V0|RAY1_ARATH	Beta-arabinofuranosyltransferase RAY1 OS=Arabidopsis thaliana GN=RAY1 PE=2 SV=1	--	--	--	--	--	--	--	--	--
transcript_HQ_TX_pn_transcript60425/f6p0/1573	1575	60.5	1.4e-113	AFZ39138.1	TCHQD class glutathione S-transferase [Physcomitrella patens]	--	--	--	--	-	-	-	-	-	33.2	3e-29	sp|O80662|TCHQD_ARATH	Glutathione S-transferase TCHQD OS=Arabidopsis thaliana GN=TCHQD PE=2 SV=1	PF13409:Glutathione S-transferase, N-terminal domain;PF13417:Glutathione S-transferase, N-terminal domain;PF02798:Glutathione S-transferase, N-terminal domain	--	--	--	--	GO:0005515	protein binding	At1g77290	Uncharacterized conserved protein (Ganglioside-induced differentiation associated protein 1, GDAP1)
transcript_HQ_TX_pn_transcript53311/f2p0/1803	1799	79.2	4e-72	XP_001763106.1	predicted protein [Physcomitrella patens]	80.38	4.06e-92	XM_001763054.1	Physcomitrella patens subsp. patens predicted protein (PHYPADRAFT_47123) mRNA, partial cds	K07447	ruvX	putative holliday junction resolvase	3.1.-.-	-	35.5	1.6e-10	sp|B8DIJ5|YQGF_DESVM	Putative pre-16S rRNA nuclease OS=Desulfovibrio vulgaris (strain Miyazaki F / DSM 19637) GN=DvMF_2352 PE=3 SV=1	PF03652:Holliday junction resolvase	GO:0006364	rRNA processing	--	--	--	--	At1g12240	Beta-fructofuranosidase (invertase)
transcript_HQ_TX_pn_transcript56303/f3p0/1713	1713	93.2	1.6e-102	XP_001785261.1	Rab6/RabH-family small GTPase [Physcomitrella patens]	89.164	0	XM_001785209.1	Physcomitrella patens subsp. patens Rab6/RabH-family small GTPase (RabH22) mRNA, complete cds	K07893	RAB6A	Ras-related protein Rab-6A	-	-	81.1	2e-87	sp|Q9LFT9|RAH1E_ARATH	Ras-related protein RABH1e OS=Arabidopsis thaliana GN=RABH1E PE=2 SV=1	PF02421:Ferrous iron transport protein B;PF08477:Ras of Complex, Roc, domain of DAPkinase;PF03193:Protein of unknown function, DUF258;PF00025:ADP-ribosylation factor family;PF00071:Ras family;PF01926:50S ribosome-binding GTPase;PF04670:Gtr1/RagA G protein conserved region	GO:0007264	small GTPase mediated signal transduction	--	--	GO:0003924//GO:0005525	GTPase activity//GTP binding	At5g10260	GTPase Rab6/YPT6/Ryh1, small G protein superfamily
transcript_HQ_TX_pn_transcript34322/f2p0/2248	2246	48.2	1.1e-116	XP_001752375.1	predicted protein [Physcomitrella patens]	87.5	5.69e-12	XM_012848673.2	PREDICTED: Setaria italica scopoletin glucosyltransferase-like (LOC105915062), mRNA	-	-	-	-	-	29.5	1.3e-54	sp|U3U992|UGT8_CATRO	7-deoxyloganetic acid glucosyltransferase OS=Catharanthus roseus GN=UGT709C2 PE=1 SV=1	PF00201:UDP-glucoronosyl and UDP-glucosyl transferase;PF04101:Glycosyltransferase family 28 C-terminal domain	GO:0008152	metabolic process	--	--	GO:0016758	transferase activity, transferring hexosyl groups	At1g22340	UDP-glucuronosyl and UDP-glucosyl transferase
transcript_HQ_TX_pn_transcript32789/f3p0/2302	2302	80.5	9.3e-199	XP_001770929.1	predicted protein [Physcomitrella patens]	81.467	0	XM_001770877.1	Physcomitrella patens subsp. patens predicted protein (PHYPADRAFT_189288) mRNA, complete cds	K11155	DGAT1	diacylglycerol O-acyltransferase 1 [EC:2.3.1.20 2.3.1.75 2.3.1.76]	2.3.1.20,2.3.1.75,2.3.1.76	ko00561; Metabolism; Lipid metabolism; Glycerolipid metabolism | ko00830; Metabolism; Metabolism of cofactors and vitamins; Retinol metabolism | ko04975; Organismal Systems; Digestive system; Fat digestion and absorption	65.5	2.5e-165	sp|A0A161IUT7|DGAT1_CORAE	Diacylglycerol O-acyltransferase 1 OS=Corylus americana GN=DGAT1 PE=1 SV=1	--	--	--	--	--	--	--	At2g19450	Sterol O-acyltransferase/Diacylglycerol O-acyltransferase
transcript_HQ_TX_pn_transcript55071/f2p0/1747	1747	58.6	4.4e-84	XP_001784196.1	predicted protein [Physcomitrella patens]	91.111	5.75e-06	XM_018980367.1	PREDICTED: Juglans regia uncharacterized LOC109002571 (LOC109002571), mRNA	-	-	-	-	-	46.6	7.3e-08	sp|Q8LGS1|MARD1_ARATH	Protein MARD1 OS=Arabidopsis thaliana GN=MARD1 PE=2 SV=2	--	--	--	--	--	--	--	--	--
transcript_LQ_TX_pn_transcript27993/f2p0/2436	2432	79.6	3.5e-257	XP_001772199.1	predicted protein [Physcomitrella patens]	88.711	0	XM_001772147.1	Physcomitrella patens subsp. patens predicted protein (PHYPADRAFT_235218) mRNA, complete cds	K11583	PPP2R3	serine/threonine-protein phosphatase 2A regulatory subunit B''	-	ko03015; Genetic Information Processing; Translation; mRNA surveillance pathway | ko04071; Environmental Information Processing; Signal transduction; Sphingolipid signaling pathway | ko04151; Environmental Information Processing; Signal transduction; PI3K-Akt signaling pathway | ko04152; Environmental Information Processing; Signal transduction; AMPK signaling pathway | ko04261; Organismal System…	61.8	1.5e-184	sp|Q9XGR4|2AB2A_ARATH	Serine/threonine protein phosphatase 2A regulatory subunit B''alpha OS=Arabidopsis thaliana GN=B''ALPHA PE=1 SV=1	PF13499:EF-hand domain pair;PF13202:EF hand;PF00036:EF hand;PF13405:EF-hand domain;PF13833:EF-hand domain pair	--	--	--	--	GO:0005509	calcium ion binding	At5g44090	Protein phosphatase 2 regulatory subunit
transcript_HQ_TX_pn_transcript61438/f9p0/1535	1535	70.2	6e-101	XP_001769717.1	predicted protein [Physcomitrella patens]	--	--	--	--	K09591	DET2	steroid 5-alpha-reductase	1.3.1.22	ko00905; Metabolism; Metabolism of terpenoids and polyketides; Brassinosteroid biosynthesis	40.2	7.4e-49	sp|Q2QDF6|DET2_GOSHI	Steroid 5-alpha-reductase DET2 OS=Gossypium hirsutum GN=DET2 PE=1 SV=1	PF02544:3-oxo-5-alpha-steroid 4-dehydrogenase	GO:0006629	lipid metabolic process	GO:0016021//GO:0005737	integral component of membrane//cytoplasm	GO:0016627	oxidoreductase activity, acting on the CH-CH group of donors	At2g38050	Steroid reductase
transcript_HQ_TX_pn_transcript68537/f9p0/1272	1272	84.6	7.5e-134	XP_001762757.1	predicted protein [Physcomitrella patens]	76.667	5.34e-10	AC231502.2	Oryza minuta clone OM__Ba0161M03, complete sequence	K17991	PXG	peroxygenase	1.11.2.3	ko00073; Metabolism; Lipid metabolism; Cutin, suberine and wax biosynthesis	44.3	2.9e-59	sp|O22788|PXG3_ARATH	Probable peroxygenase 3 OS=Arabidopsis thaliana GN=PXG3 PE=1 SV=1	PF13405:EF-hand domain	--	--	--	--	GO:0005509	calcium ion binding	--	--
transcript_HQ_TX_pn_transcript60141/f2p0/1604	1604	37.3	2.4e-36	XP_001765732.1	predicted protein [Physcomitrella patens]	--	--	--	--	-	-	-	-	-	27.1	2.2e-19	sp|P25848|PHY1_CERPU	Light-sensor Protein kinase OS=Ceratodon purpureus GN=PHY1 PE=3 SV=3	--	--	--	--	--	--	--	At2g17700	Tyrosine kinase specific for activated (GTP-bound) p21cdc42Hs
transcript_HQ_TX_pn_transcript65267/f2p0/1428	1428	49.4	1.9e-61	XP_001758809.1	predicted protein [Physcomitrella patens]	--	--	--	--	-	-	-	-	-	--	--	--	--	PF01442:Apolipoprotein A1/A4/E domain	GO:0006869//GO:0042157	lipid transport//lipoprotein metabolic process	GO:0005576	extracellular region	GO:0008289	lipid binding	--	--
transcript_HQ_TX_pn_transcript71720/f5p0/1066	1066	--	--	--	--	--	--	--	--	--	--	--	--	--	--	--	--	--	PF02496:ABA/WDS induced protein;PF09726:Transmembrane protein	GO:0006950	response to stress	GO:0016021	integral component of membrane	--	--	--	--
transcript_HQ_TX_pn_transcript51792/f2p0/1828	1827	88.2	1.3e-216	XP_001773190.1	predicted protein [Physcomitrella patens]	83.961	0	XM_001773138.1	Physcomitrella patens subsp. patens predicted protein (PHYPADRAFT_107421) mRNA, complete cds	K00616	E2.2.1.2, talA, talB	transaldolase	2.2.1.2	ko01200; Metabolism; Global and overview maps; Carbon metabolism | ko01230; Metabolism; Global and overview maps; Biosynthesis of amino acids | ko00030; Metabolism; Carbohydrate metabolism; Pentose phosphate pathway	51.9	1.7e-84	sp|Q6AF36|TAL_LEIXX	Transaldolase OS=Leifsonia xyli subsp. xyli (strain CTCB07) GN=tal PE=3 SV=1	PF00923:Transaldolase	GO:0005975	carbohydrate metabolic process	--	--	--	--	At5g13420	Transaldolase
transcript_HQ_TX_pn_transcript69012/f6p0/1248	1248	84.4	1.6e-80	XP_001773374.1	predicted protein [Physcomitrella patens]	81.609	0	XM_001758565.1	Physcomitrella patens subsp. patens predicted protein (PHYPADRAFT_206296) mRNA, complete cds	-	-	-	-	-	61.2	7.1e-58	sp|O48670|RER1A_ARATH	Protein RER1A OS=Arabidopsis thaliana GN=RER1A PE=1 SV=1	PF03248:Rer1 family	--	--	GO:0016021	integral component of membrane	--	--	At4g39220	Golgi proteins involved in ER retention (RER)
transcript_HQ_TX_pn_transcript54989/f2p0/1751	1751	92.9	2.3e-221	XP_001785917.1	predicted protein [Physcomitrella patens]	86.095	0	XM_001785865.1	Physcomitrella patens subsp. patens predicted protein (PHYPADRAFT_228333) mRNA, complete cds	-	-	-	-	-	33.7	5.3e-67	sp|Q91VK1|BZW2_MOUSE	Basic leucine zipper and W2 domain-containing protein 2 OS=Mus musculus GN=Bzw2 PE=1 SV=1	PF02020:eIF4-gamma/eIF5/eIF2-epsilon	--	--	--	--	GO:0005515	protein binding	At1g65220	Predicted translation factor, contains W2 domain
transcript_HQ_TX_pn_transcript42554/f2p0/2051	2051	87.4	2.8e-53	XP_001773688.1	predicted protein [Physcomitrella patens]	--	--	--	--	-	-	-	-	-	52.3	3.7e-27	sp|A6LVG3|Y2176_CLOB8	UPF0060 membrane protein Cbei_2176 OS=Clostridium beijerinckii (strain ATCC 51743 / NCIMB 8052) GN=Cbei_2176 PE=3 SV=1	--	--	--	--	--	--	--	--	--
transcript_HQ_TX_pn_transcript29868/f7p0/2363	2363	93.7	4.6e-68	XP_001763021.1	predicted protein [Physcomitrella patens]	80.285	5.43e-82	XM_001752936.1	Physcomitrella patens subsp. patens predicted protein (PHYPADRAFT_25892) mRNA, partial cds	-	-	-	-	-	61.6	1.8e-41	sp|O23620|AHL23_ARATH	AT-hook motif nuclear-localized protein 23 OS=Arabidopsis thaliana GN=AHL23 PE=1 SV=1	--	--	--	--	--	--	--	--	--
transcript_HQ_TX_pn_transcript14017/f2p0/2924	2923	97.6	0	AMH40475.1	G-type lectin-domain containing receptor kinase 3 [Pohlia nutans]	99.959	0	KT734732.1	Pohlia nutans G-type lectin-domain containing receptor kinase 3 (LecRLK3) mRNA, complete cds	-	-	-	-	-	31.5	4.4e-74	sp|O64477|Y2913_ARATH	G-type lectin S-receptor-like serine/threonine-protein kinase At2g19130 OS=Arabidopsis thaliana GN=At2g19130 PE=2 SV=1	PF05030:SSXT protein (N-terminal region);PF00954:S-locus glycoprotein domain;PF00069:Protein kinase domain;PF07714:Protein tyrosine kinase	GO:0006468//GO:0048544	protein phosphorylation//recognition of pollen	--	--	GO:0003713//GO:0004672//GO:0005524	transcription coactivator activity//protein kinase activity//ATP binding	--	--
transcript_HQ_TX_pn_transcript68233/f3p0/1256	1256	93.8	1.9e-145	XP_001762199.1	predicted protein [Physcomitrella patens]	87.29	0	XM_001762147.1	Physcomitrella patens subsp. patens predicted protein (PHYPADRAFT_163186) mRNA, complete cds	K02739	PSMB7	20S proteasome subunit beta 2	3.4.25.1	ko03050; Genetic Information Processing; Folding, sorting and degradation; Proteasome	75.8	2.8e-118	sp|Q7DLS1|PSB7B_ARATH	Proteasome subunit beta type-7-B OS=Arabidopsis thaliana GN=PBB2 PE=1 SV=2	PF00227:Proteasome subunit	GO:0051603	proteolysis involved in cellular protein catabolic process	GO:0005839	proteasome core complex	GO:0004298	threonine-type endopeptidase activity	At5g40580	20S proteasome, regulatory subunit beta type PSMB7/PSMB10/PUP1
transcript_HQ_TX_pn_transcript22106/f70p0/2520	2520	38	1.2e-98	XP_001773290.1	predicted protein [Physcomitrella patens]	--	--	--	--	-	-	-	-	-	27.6	6.1e-08	sp|Q6UW68|TM205_HUMAN	Transmembrane protein 205 OS=Homo sapiens GN=TMEM205 PE=1 SV=1	PF07464:Apolipophorin-III precursor (apoLp-III);PF01442:Apolipoprotein A1/A4/E domain;PF04119:Heat shock protein 9/12	GO:0006950//GO:0042157//GO:0006869	response to stress//lipoprotein metabolic process//lipid transport	GO:0005576	extracellular region	GO:0008289	lipid binding	At1g72100	Uncharacterized conserved protein
transcript_HQ_TX_pn_transcript71182/f2p0/1084	1085	--	--	--	--	--	--	--	--	--	--	--	--	--	--	--	--	--	--	--	--	--	--	--	--	--	--
transcript_HQ_TX_pn_transcript8387/f2p0/3313	3312	83.7	0	XP_001781353.1	predicted protein [Physcomitrella patens]	76.681	0	DQ239566.1	Funaria hygrometrica heat shock protein 101 (HSP101) mRNA, complete cds	K03695	clpB	ATP-dependent Clp protease ATP-binding subunit ClpB	-	ko04213; Organismal Systems; Aging; Longevity regulating pathway - multiple species	77	0	sp|Q6F2Y7|CLPB1_ORYSJ	Chaperone protein ClpB1 OS=Oryza sativa subsp. japonica GN=CLPB1 PE=2 SV=1	PF08477:Ras of Complex, Roc, domain of DAPkinase;PF10186:Vacuolar sorting 38 and autophagy-related subunit 14;PF00158:Sigma-54 interaction domain;PF01695:IstB-like ATP binding protein;PF07724:AAA domain (Cdc48 subfamily);PF07726:ATPase family associated with various cellular activities (AAA);PF00910:RNA helicase;PF10662:Ethanolamine utilisation - propanediol utilisation;PF00448:SRP54-type protein…	GO:0006355//GO:0002949//GO:0006614//GO:0019538//GO:0006310//GO:0006810//GO:0006576//GO:0010508//GO:0007264//GO:0006281	regulation of transcription, DNA-templated//tRNA threonylcarbamoyladenosine modification//SRP-dependent cotranslational protein targeting to membrane//protein metabolic process//DNA recombination//transport//cellular biogenic amine metabolic process//positive regulation of autophagy//small GTPase mediated signal transduction//DNA repair	--	--	GO:0016787//GO:0003724//GO:0003723//GO:0005524//GO:0005525//GO:0009378//GO:0003677//GO:0016301//GO:0003924//GO:0008134//GO:0016887	hydrolase activity//RNA helicase activity//RNA binding//ATP binding//GTP binding//four-way junction helicase activity//DNA binding//kinase activity//GTPase activity//transcription factor binding//ATPase activity	At1g74310	Chaperone HSP104 and related ATP-dependent Clp proteases
transcript_HQ_TX_pn_transcript12395/f4p0/3063	3063	50.4	4.9e-62	KOM57798.1	hypothetical protein LR48_Vigan11g083100 [Vigna angularis]	--	--	--	--	K03100	lepB, TPP	signal peptidase I	3.4.21.89	ko03060; Genetic Information Processing; Folding, sorting and degradation; Protein export | ko02024; Cellular Processes; Cellular community - prokaryotes; Quorum sensing	66.1	3.4e-45	sp|Q8H0W1|PLSP1_ARATH	Chloroplast processing peptidase OS=Arabidopsis thaliana GN=PLSP1 PE=2 SV=2	--	--	--	--	--	--	--	At3g24590	Mitochondrial inner membrane protease, subunit IMP1
transcript_HQ_TX_pn_transcript62475/f6p0/1499	1499	94.2	2.1e-199	XP_001758533.1	predicted protein [Physcomitrella patens]	86.927	0	XM_001758481.1	Physcomitrella patens subsp. patens predicted protein (PHYPADRAFT_161474) mRNA, complete cds	K14298	RAE1, GLE2	mRNA export factor	-	ko03013; Genetic Information Processing; Translation; RNA transport | ko05164; Human Diseases; Infectious diseases: Viral; Influenza A	76	2.1e-165	sp|Q38942|RAE1_ARATH	Protein RAE1 OS=Arabidopsis thaliana GN=RAE1 PE=1 SV=2	PF00400:WD domain, G-beta repeat	--	--	--	--	GO:0005515	protein binding	At1g80670	mRNA export protein (contains WD40 repeats)
transcript_HQ_TX_pn_transcript69232/f3p0/1247	1247	70.8	4e-87	XP_001768345.1	predicted protein [Physcomitrella patens]	77.72	9.56e-127	XM_001768293.1	Physcomitrella patens subsp. patens predicted protein (PHYPADRAFT_214518) mRNA, complete cds	K09873	TIP	aquaporin TIP	-	-	44	4.6e-49	sp|P33560|TIP_ANTMA	Probable aquaporin TIP-type OS=Antirrhinum majus GN=DIP PE=2 SV=1	--	--	--	--	--	--	--	At3g16240	Aquaporin (major intrinsic protein family)
transcript_HQ_TX_pn_transcript49889/f2p0/1858	1854	71.9	8.7e-147	XP_001767124.1	predicted protein [Physcomitrella patens]	--	--	--	--	K01307	GGH	gamma-glutamyl hydrolase	3.4.19.9	ko00790; Metabolism; Metabolism of cofactors and vitamins; Folate biosynthesis | ko01523; Human Diseases; Drug resistance: Antineoplastic; Antifolate resistance	37	1.8e-52	sp|Q54LN4|GGHA_DICDI	Gamma-glutamyl hydrolase A OS=Dictyostelium discoideum GN=gghA PE=3 SV=1	PF07722:Peptidase C26	GO:0006541	glutamine metabolic process	--	--	GO:0016787	hydrolase activity	Hs4503987	Gamma-glutamyl hydrolase
transcript_HQ_TX_pn_transcript29330/f8p0/2374	2374	79.4	2.8e-243	XP_001765021.1	predicted protein [Physcomitrella patens]	81.914	0	XM_001762205.1	Physcomitrella patens subsp. patens predicted protein (PHYPADRAFT_181924) mRNA, complete cds	K13648	GAUT	alpha-1,4-galacturonosyltransferase	2.4.1.43	ko00520; Metabolism; Carbohydrate metabolism; Amino sugar and nucleotide sugar metabolism	55.7	6.7e-174	sp|Q9SKT6|GAUTA_ARATH	Probable galacturonosyltransferase 10 OS=Arabidopsis thaliana GN=GAUT10 PE=2 SV=2	PF01501:Glycosyl transferase family 8	--	--	--	--	GO:0016757	transferase activity, transferring glycosyl groups	--	--
transcript_HQ_TX_pn_transcript47255/f4p0/1926	1926	47.3	1.9e-59	XP_001781955.1	predicted protein [Physcomitrella patens]	--	--	--	--	-	-	-	-	-	35.7	2.7e-08	sp|Q9LF57|HIP21_ARATH	Heavy metal-associated isoprenylated plant protein 21 OS=Arabidopsis thaliana GN=HIPP21 PE=1 SV=1	PF00403:Heavy-metal-associated domain	GO:0030001	metal ion transport	--	--	GO:0046872	metal ion binding	At5g17450	Copper chaperone
transcript_HQ_TX_pn_transcript72317/f3p0/1063	1064	81.9	5.4e-77	XP_001784281.1	predicted protein [Physcomitrella patens]	82.41	0	XM_001784229.1	Physcomitrella patens subsp. patens predicted protein (PHYPADRAFT_153718) mRNA, complete cds	-	-	-	-	-	62.5	3.3e-48	sp|Q9SCQ7|AN32_ARATH	Acidic leucine-rich nuclear phosphoprotein 32-related protein OS=Arabidopsis thaliana GN=At3g50690 PE=2 SV=1	PF00560:Leucine Rich Repeat;PF13516:Leucine Rich repeat;PF13855:Leucine rich repeat	--	--	--	--	GO:0005515	protein binding	At3g50690	Leucine-rich acidic nuclear protein
transcript_HQ_TX_pn_transcript25664/f4p0/2503	2503	48.7	2.5e-56	OAE19396.1	hypothetical protein AXG93_698s1250 [Marchantia polymorpha subsp. polymorpha]	84.452	7.55e-71	XM_001752899.1	Physcomitrella patens subsp. patens predicted protein (PHYPADRAFT_113607) mRNA, complete cds	-	-	-	-	-	48.4	2.2e-42	sp|Q9SRT2|BH062_ARATH	Transcription factor bHLH62 OS=Arabidopsis thaliana GN=BHLH62 PE=2 SV=1	PF02590:Predicted SPOUT methyltransferase;PF00010:Helix-loop-helix DNA-binding domain	GO:0006364	rRNA processing	GO:0005737	cytoplasm	GO:0008168//GO:0046983	methyltransferase activity//protein dimerization activity	--	--
transcript_HQ_TX_pn_transcript44371/f4p0/2003	2003	46.8	5.1e-84	XP_015891879.1	PREDICTED: phytochrome A-associated F-box protein [Ziziphus jujuba]	--	--	--	--	-	-	-	-	-	43.9	6.7e-74	sp|Q8LEA8|EID1_ARATH	Phytochrome A-associated F-box protein OS=Arabidopsis thaliana GN=EID1 PE=1 SV=2	PF00646:F-box domain;PF12937:F-box-like	--	--	--	--	GO:0005515	protein binding	--	--
transcript_HQ_TX_pn_transcript62432/f3p0/1533	1533	58.5	3.7e-103	XP_001751306.1	predicted protein [Physcomitrella patens]	--	--	--	--	-	-	-	-	-	42.2	6.3e-64	sp|O82656|PTP1_ARATH	Protein-tyrosine-phosphatase PTP1 OS=Arabidopsis thaliana GN=PTP1 PE=1 SV=1	PF02877:Poly(ADP-ribose) polymerase, regulatory domain;PF00782:Dual specificity phosphatase, catalytic domain;PF00102:Protein-tyrosine phosphatase	GO:0006470//GO:0006471	protein dephosphorylation//protein ADP-ribosylation	--	--	GO:0004725//GO:0008138//GO:0003950	protein tyrosine phosphatase activity//protein tyrosine/serine/threonine phosphatase activity//NAD+ ADP-ribosyltransferase activity	At1g71860	Protein tyrosine phosphatase
transcript_HQ_TX_pn_transcript49828/f3p0/1877	1878	53.7	4.5e-42	XP_001752791.1	predicted protein [Physcomitrella patens]	--	--	--	--	-	-	-	-	-	45.2	2.8e-21	sp|Q9LET3|RBL20_ARATH	Rhomboid-like protein 20 OS=Arabidopsis thaliana GN=RBL20 PE=2 SV=1	PF01694:Rhomboid family	--	--	GO:0016021	integral component of membrane	GO:0004252	serine-type endopeptidase activity	At3g56740	Uncharacterized conserved protein
transcript_HQ_TX_pn_transcript24454/f3p0/2420	2420	66.7	3e-179	XP_001754527.1	predicted protein [Physcomitrella patens]	75.513	0	XM_001754475.1	Physcomitrella patens subsp. patens predicted protein (PHYPADRAFT_203300) mRNA, complete cds	-	-	-	-	-	47.5	3.2e-123	sp|Q9C9Z1|ZTP50_ARATH	Putative zinc transporter At3g08650 OS=Arabidopsis thaliana GN=At3g08650 PE=2 SV=2	PF02535:ZIP Zinc transporter	GO:0055085//GO:0030001	transmembrane transport//metal ion transport	GO:0016020	membrane	GO:0046873	metal ion transmembrane transporter activity	At3g08650	Zinc transporter and related ZIP domain-containing proteins
transcript_HQ_TX_pn_transcript53506/f3p0/1757	1753	79.3	3.4e-161	XP_001767380.1	predicted protein [Physcomitrella patens]	--	--	--	--	-	-	-	-	-	32.5	2.4e-51	sp|P31597|EAA3_RABIT	Excitatory amino acid transporter 3 OS=Oryctolagus cuniculus GN=SLC1A1 PE=2 SV=1	PF00375:Sodium:dicarboxylate symporter family	--	--	GO:0016021	integral component of membrane	GO:0015293	symporter activity	CE14886	Glutamate/aspartate and neutral amino acid transporters
transcript_HQ_TX_pn_transcript41420/f2p0/2071	2071	84.8	7.3e-94	XP_001777570.1	predicted protein [Physcomitrella patens]	--	--	--	--	-	-	-	-	-	--	--	--	--	--	--	--	--	--	--	--	--	--
transcript_HQ_TX_pn_transcript2263/f3p0/4233	4232	45.8	1e-105	XP_001781276.1	predicted protein [Physcomitrella patens]	82.558	2.34e-08	KM665901.1	Ananas bracteatus clone 51087 microsatellite sequence	-	-	-	-	-	69.3	1.6e-37	sp|Q9C7B1|TRP3_ARATH	Telomere repeat-binding protein 3 OS=Arabidopsis thaliana GN=TRP3 PE=1 SV=1	--	--	--	--	--	--	--	--	--
transcript_HQ_TX_pn_transcript54868/f3p0/1757	1757	62.5	7.9e-65	XP_001777399.1	predicted protein [Physcomitrella patens]	--	--	--	--	-	-	-	-	-	--	--	--	--	PF01596:O-methyltransferase	--	--	--	--	GO:0008171	O-methyltransferase activity	--	--
transcript_HQ_TX_pn_transcript65328/f2p0/1360	1358	80.5	4.9e-139	XP_001777349.1	predicted protein [Physcomitrella patens]	--	--	--	--	-	-	-	-	-	--	--	--	--	--	--	--	--	--	--	--	--	--
transcript_HQ_TX_pn_transcript14513/f9p0/2884	2884	75.6	0	XP_001777520.1	predicted protein [Physcomitrella patens]	83.235	0	XM_001777468.1	Physcomitrella patens subsp. patens predicted protein (PHYPADRAFT_169848) mRNA, complete cds	K01897	ACSL, fadD	long-chain acyl-CoA synthetase	6.2.1.3	ko01212; Metabolism; Global and overview maps; Fatty acid metabolism | ko00061; Metabolism; Lipid metabolism; Fatty acid biosynthesis | ko00071; Metabolism; Lipid metabolism; Fatty acid degradation | ko04146; Cellular Processes; Transport and catabolism; Peroxisome | ko02024; Cellular Processes; Cellular community - prokaryotes; Quorum sensing | ko04920; Organismal Systems; Endocrine system; Adip…	49	7.1e-186	sp|Q9LK39|AAE16_ARATH	Probable acyl-activating enzyme 16, chloroplastic OS=Arabidopsis thaliana GN=AAE16 PE=2 SV=1	PF00501:AMP-binding enzyme	GO:0008152	metabolic process	--	--	GO:0003824	catalytic activity	At4g14070	Long-chain acyl-CoA synthetases (AMP-forming)
transcript_HQ_TX_pn_transcript66880/f9p0/1328	1328	90.4	6.7e-101	XP_001774185.1	predicted protein [Physcomitrella patens]	--	--	--	--	K09140	TSR3	pre-rRNA-processing protein TSR3	-	-	54.1	1.6e-52	sp|Q5HZH2|TSR3_MOUSE	Ribosome biogenesis protein TSR3 homolog OS=Mus musculus GN=Tsr3 PE=1 SV=1	PF04931:DNA polymerase phi;PF04147:Nop14-like family	GO:0006351	transcription, DNA-templated	GO:0032040	small-subunit processome	GO:0003887//GO:0003677	DNA-directed DNA polymerase activity//DNA binding	At5g10070	Uncharacterized conserved protein
transcript_HQ_TX_pn_transcript70747/f5p0/1149	1149	29.3	2.3e-09	XP_001753869.1	predicted protein [Physcomitrella patens]	--	--	--	--	-	-	-	-	-	--	--	--	--	PF00407:Pathogenesis-related protein Bet v I family	GO:0009607//GO:0006952	response to biotic stimulus//defense response	--	--	--	--	--	--
transcript_HQ_TX_pn_transcript66028/f3p0/1386	1386	--	--	--	--	--	--	--	--	--	--	--	--	--	--	--	--	--	--	--	--	--	--	--	--	--	--
transcript_HQ_TX_pn_transcript34126/f4p0/2247	2247	82.3	1.4e-127	XP_001770637.1	predicted protein [Physcomitrella patens]	84.251	0	XM_001770585.1	Physcomitrella patens subsp. patens predicted protein (PHYPADRAFT_189047) mRNA, complete cds	K11841	USP10, UBP3	ubiquitin carboxyl-terminal hydrolase 10	3.4.19.12	ko04139; Cellular Processes; Transport and catabolism; Mitophagy - yeast	52.1	4.8e-97	sp|Q9FPS3|UBP24_ARATH	Ubiquitin carboxyl-terminal hydrolase 24 OS=Arabidopsis thaliana GN=UBP24 PE=1 SV=1	PF00443:Ubiquitin carboxyl-terminal hydrolase	GO:0016579	protein deubiquitination	--	--	GO:0036459	thiol-dependent ubiquitinyl hydrolase activity	At4g30890	Ubiquitin-specific protease
transcript_HQ_TX_pn_transcript44632/f2p0/1975	1975	69.1	1.9e-120	XP_001758395.1	predicted protein [Physcomitrella patens]	--	--	--	--	K04708	E1.1.1.102	3-dehydrosphinganine reductase	1.1.1.102	ko00600; Metabolism; Lipid metabolism; Sphingolipid metabolism	32.1	6.9e-31	sp|Q0WRJ2|TC10A_ARATH	3-dehydrosphinganine reductase TSC10A OS=Arabidopsis thaliana GN=TSC10A PE=1 SV=1	PF01370:NAD dependent epimerase/dehydratase family	--	--	--	--	GO:0050662//GO:0003824	coenzyme binding//catalytic activity	At3g06060	Predicted 3-ketosphinganine reductase
transcript_HQ_TX_pn_transcript57417/f6p0/1604	1604	86.2	8.2e-186	XP_001758714.1	predicted protein [Physcomitrella patens]	81.802	0	XM_001758662.1	Physcomitrella patens subsp. patens predicted protein (PHYPADRAFT_120582) mRNA, complete cds	K01623	ALDO	fructose-bisphosphate aldolase, class I	4.1.2.13	ko01200; Metabolism; Global and overview maps; Carbon metabolism | ko01230; Metabolism; Global and overview maps; Biosynthesis of amino acids | ko00010; Metabolism; Carbohydrate metabolism; Glycolysis / Gluconeogenesis | ko00030; Metabolism; Carbohydrate metabolism; Pentose phosphate pathway | ko00051; Metabolism; Carbohydrate metabolism; Fructose and mannose metabolism | ko00710; Metabolism; Ene…	76.6	8e-163	sp|Q40677|ALFP_ORYSJ	Fructose-bisphosphate aldolase, chloroplastic OS=Oryza sativa subsp. japonica GN=ALDP PE=1 SV=2	PF00274:Fructose-bisphosphate aldolase class-I	GO:0006096	glycolytic process	--	--	GO:0004332	fructose-bisphosphate aldolase activity	At2g01140	Fructose-biphosphate aldolase
transcript_HQ_TX_pn_transcript26731/f2p0/2404	2404	67.4	5.4e-242	OAE31915.1	hypothetical protein AXG93_4485s1020 [Marchantia polymorpha subsp. polymorpha]	81.592	0	XM_001771856.1	Physcomitrella patens subsp. patens predicted protein (PHYPADRAFT_217529) mRNA, complete cds	K20032	ZDHHC13_17, HIP14	palmitoyltransferase ZDHHC13/17	2.3.1.225	-	57.8	8.6e-201	sp|Q52T38|ZDH22_ARATH	Protein S-acyltransferase 24 OS=Arabidopsis thaliana GN=PAT24 PE=2 SV=1	PF13606:Ankyrin repeat;PF00219:Insulin-like growth factor binding protein;PF00023:Ankyrin repeat	GO:0001558	regulation of cell growth	GO:0005576	extracellular region	GO:0005515//GO:0005520	protein binding//insulin-like growth factor binding	At5g20350	Ankyrin repeat and DHHC-type Zn-finger domain containing proteins
transcript_HQ_TX_pn_transcript76774/f4p0/561	561	54.5	8.5e-13	XP_001758809.1	predicted protein [Physcomitrella patens]	--	--	--	--	-	-	-	-	-	--	--	--	--	PF01442:Apolipoprotein A1/A4/E domain	GO:0006869//GO:0042157	lipid transport//lipoprotein metabolic process	GO:0005576	extracellular region	GO:0008289	lipid binding	--	--
transcript_HQ_TX_pn_transcript43880/f2p0/2021	2019	48.8	4.7e-21	XP_001781895.1	predicted protein [Physcomitrella patens]	--	--	--	--	-	-	-	-	-	26.7	1.2e-19	sp|Q7XKC5|IDEFH_ORYSJ	B3 domain-containing protein Os04g0676600 OS=Oryza sativa subsp. japonica GN=Os04g0676600 PE=2 SV=2	PF01458:Uncharacterized protein family (UPF0051);PF02362:B3 DNA binding domain	GO:0016226	iron-sulfur cluster assembly	--	--	GO:0003677	DNA binding	--	--
transcript_HQ_TX_pn_transcript36305/f4p0/2181	2181	85.6	1.7e-255	AHI15941.1	flavonoid 3'-hydroxylase [Pohlia nutans]	97.067	0	KF835366.1	Pohlia nutans isolate MFC00088 flavonoid 3'-hydroxylase mRNA, complete cds	-	-	-	-	-	36.1	3.1e-72	sp|P48419|C75A3_PETHY	Flavonoid 3',5'-hydroxylase 2 OS=Petunia hybrida GN=CYP75A3 PE=2 SV=1	PF00067:Cytochrome P450	GO:0055114	oxidation-reduction process	--	--	GO:0020037//GO:0005506//GO:0016705	heme binding//iron ion binding//oxidoreductase activity, acting on paired donors, with incorporation or reduction of molecular oxygen	At5g07990	Cytochrome P450 CYP2 subfamily
transcript_HQ_TX_pn_transcript15517/f3p0/2899	2899	81.7	2.8e-216	XP_001775957.1	predicted protein [Physcomitrella patens]	82.061	0	XM_001775905.1	Physcomitrella patens subsp. patens predicted protein (PHYPADRAFT_220713) mRNA, complete cds	K13606	NOL, NYC1	chlorophyll(ide) b reductase	1.1.1.294	ko00860; Metabolism; Metabolism of cofactors and vitamins; Porphyrin and chlorophyll metabolism	57.3	4.9e-134	sp|Q5N800|NYC1_ORYSJ	Probable chlorophyll(ide) b reductase NYC1, chloroplastic OS=Oryza sativa subsp. japonica GN=NYC1 PE=1 SV=1	--	--	--	--	--	--	--	At4g13250	Reductases with broad range of substrate specificities
transcript_HQ_TX_pn_transcript31535/f2p0/2331	2331	79.9	3.9e-51	XP_001760201.1	predicted protein [Physcomitrella patens]	82.713	1.11e-108	XM_001760149.1	Physcomitrella patens subsp. patens predicted protein (PHYPADRAFT_162318) mRNA, complete cds	-	-	-	-	-	--	--	--	--	--	--	--	--	--	--	--	--	--
transcript_HQ_TX_pn_transcript30661/f8p0/2301	2301	58.5	1.7e-107	XP_001755573.1	predicted protein [Physcomitrella patens]	--	--	--	--	-	-	-	-	-	35.5	1.9e-11	sp|P14198|AAC4_DICDI	AAC-rich mRNA clone AAC4 protein OS=Dictyostelium discoideum GN=AAC4 PE=2 SV=3	--	--	--	--	--	--	--	--	--
transcript_HQ_TX_pn_transcript43419/f8p0/2026	2026	82.4	5.6e-240	XP_001766264.1	predicted protein [Physcomitrella patens]	--	--	--	--	-	-	-	-	-	82.4	5.5e-241	sp|A9SIZ6|D5FAD_PHYPA	Acyl-lipid (8-3)-desaturase OS=Physcomitrella patens subsp. patens GN=DES5 PE=1 SV=1	PF00487:Fatty acid desaturase	GO:0006629	lipid metabolic process	--	--	--	--	Hs4758334	Delta 6-fatty acid desaturase/delta-8 sphingolipid desaturase
transcript_HQ_TX_pn_transcript33225/f6p0/2258	2258	65.6	8.7e-133	XP_001781655.1	predicted protein [Physcomitrella patens]	--	--	--	--	K15102	SLC25A3, PHC, PIC	solute carrier family 25 (mitochondrial phosphate transporter), member 3	-	-	59.2	3.1e-112	sp|Q9M2Z8|MPCP2_ARATH	Mitochondrial phosphate carrier protein 2, mitochondrial OS=Arabidopsis thaliana GN=MPT2 PE=2 SV=1	PF04258:Signal peptide peptidase	--	--	GO:0016021	integral component of membrane	GO:0004190	aspartic-type endopeptidase activity	At3g48850	Mitochondrial phosphate carrier protein
transcript_HQ_TX_pn_transcript4530/f4p0/3771	3771	74.7	2.7e-256	XP_001753625.1	predicted protein [Physcomitrella patens]	83.78	0	XM_001753573.1	Physcomitrella patens subsp. patens predicted protein (PHYPADRAFT_114643) mRNA, complete cds	-	-	-	-	-	37.4	3.2e-101	sp|Q8S2T0|GRIP_ARATH	Protein GRIP OS=Arabidopsis thaliana GN=GRIP PE=1 SV=2	PF01465:GRIP domain;PF02183:Homeobox associated leucine zipper	GO:0006355//GO:0000042	regulation of transcription, DNA-templated//protein targeting to Golgi	--	--	GO:0005515//GO:0043565//GO:0003700	protein binding//sequence-specific DNA binding//transcription factor activity, sequence-specific DNA binding	--	--
transcript_HQ_TX_pn_transcript26004/f2p0/2498	2498	75.4	2.3e-219	XP_001771186.1	predicted protein [Physcomitrella patens]	100	2.3e-06	CP019094.1	Spirodela polyrhiza strain 9509 chromosome 2 sequence	K13508	GPAT	glycerol-3-phosphate acyltransferase	2.3.1.15,2.3.1.198	ko00561; Metabolism; Lipid metabolism; Glycerolipid metabolism | ko00564; Metabolism; Lipid metabolism; Glycerophospholipid metabolism	55	1.7e-159	sp|O80437|GPAT6_ARATH	Glycerol-3-phosphate 2-O-acyltransferase 6 OS=Arabidopsis thaliana GN=GPAT6 PE=1 SV=1	PF01553:Acyltransferase	GO:0008152	metabolic process	--	--	GO:0016746	transferase activity, transferring acyl groups	--	--
transcript_HQ_TX_pn_transcript43350/f2p0/2038	2038	54.2	4.4e-43	XP_001761019.1	predicted protein [Physcomitrella patens]	--	--	--	--	-	-	-	-	-	40	5.8e-25	sp|Q9ZWQ9|FLS_CITUN	Flavonol synthase/flavanone 3-hydroxylase OS=Citrus unshiu GN=FLS PE=1 SV=1	--	--	--	--	--	--	--	At2g38240	Iron/ascorbate family oxidoreductases
transcript_HQ_TX_pn_transcript8433/f2p0/3360	3359	76.7	3.4e-117	XP_001767534.1	predicted protein [Physcomitrella patens]	72.606	1.8e-28	XM_010531317.2	PREDICTED: Tarenaya hassleriana uncharacterized LOC104806420 (LOC104806420), mRNA	-	-	-	-	-	--	--	--	--	PF02434:Fringe-like;PF01762:Galactosyltransferase	GO:0006486	protein glycosylation	GO:0016020	membrane	GO:0008378//GO:0016757	galactosyltransferase activity//transferase activity, transferring glycosyl groups	At1g33250	Galactosyltransferases
transcript_HQ_TX_pn_transcript32533/f2p0/2304	2304	67.9	1.7e-35	XP_001753318.1	predicted protein [Physcomitrella patens]	--	--	--	--	-	-	-	-	-	--	--	--	--	--	--	--	--	--	--	--	--	--
transcript_HQ_TX_pn_transcript234/f2p0/5401	5395	77.9	0	XP_001754894.1	ATP-binding cassette transporter, subfamily G, member 27, group PDR protein PpABCG27 [Physcomitrella patens]	81.411	0	XM_001754842.1	Physcomitrella patens subsp. patens ATP-binding cassette transporter, subfamily G, member 27, group PDR protein PpABCG27 (ppabcg27) mRNA, complete cds	-	-	-	-	-	54.9	0	sp|O24367|TUR2_SPIPO	Pleiotropic drug resistance protein TUR2 OS=Spirodela polyrhiza GN=TUR2 PE=1 SV=1	PF03266:NTPase;PF07728:AAA domain (dynein-related subfamily);PF03796:DnaB-like helicase C terminal domain;PF01061:ABC-2 type transporter;PF06422:CDR ABC transporter;PF03193:Protein of unknown function, DUF258;PF00005:ABC transporter;PF01926:50S ribosome-binding GTPase;PF00004:ATPase family associated with various cellular activities (AAA);PF13304:AAA domain, putative AbiEii toxin, Type IV TA syst…	GO:0006260//GO:0006810	DNA replication//transport	GO:0016020//GO:0016021	membrane//integral component of membrane	GO:0005525//GO:0098519//GO:0005524//GO:0003678//GO:0016887//GO:0042626//GO:0003924	GTP binding//nucleotide phosphatase activity, acting on free nucleotides//ATP binding//DNA helicase activity//ATPase activity//ATPase activity, coupled to transmembrane movement of substances//GTPase activity	At1g59870	Pleiotropic drug resistance proteins (PDR1-15), ABC superfamily
transcript_HQ_TX_pn_transcript10856/f2p0/3160	3160	62.7	2e-167	XP_001757065.1	predicted protein [Physcomitrella patens]	79.809	0	XM_001762627.1	Physcomitrella patens subsp. patens predicted protein (PHYPADRAFT_163492) mRNA, complete cds	-	-	-	-	-	--	--	--	--	--	--	--	--	--	--	--	--	--
transcript_HQ_TX_pn_transcript40911/f2p0/2092	2092	64.3	9.6e-211	XP_001751342.1	predicted protein [Physcomitrella patens]	73.743	2.35e-45	XM_018609783.1	PREDICTED: Raphanus sativus NADP-dependent malic enzyme 3-like (LOC108836651), partial mRNA	K00029	E1.1.1.40, maeB	malate dehydrogenase (oxaloacetate-decarboxylating)(NADP+)	1.1.1.40	ko01200; Metabolism; Global and overview maps; Carbon metabolism | ko00620; Metabolism; Carbohydrate metabolism; Pyruvate metabolism | ko00710; Metabolism; Energy metabolism; Carbon fixation in photosynthetic organisms	59.4	4.5e-198	sp|P51615|MAOX_VITVI	NADP-dependent malic enzyme OS=Vitis vinifera PE=2 SV=1	PF03949:Malic enzyme, NAD binding domain;PF00390:Malic enzyme, N-terminal domain	GO:0055114	oxidation-reduction process	--	--	GO:0004471//GO:0051287	malate dehydrogenase (decarboxylating) (NAD+) activity//NAD binding	At2g19900	NADP+-dependent malic enzyme
transcript_HQ_TX_pn_transcript71786/f2p0/1095	1095	72	9.6e-61	XP_001759526.1	predicted protein [Physcomitrella patens]	--	--	--	--	-	-	-	-	-	43	2.2e-10	sp|O31633|YJCK_BACSU	Putative ribosomal-protein-alanine acetyltransferase OS=Bacillus subtilis (strain 168) GN=yjcK PE=3 SV=1	PF00583:Acetyltransferase (GNAT) family;PF13302:Acetyltransferase (GNAT) domain	--	--	--	--	GO:0008080	N-acetyltransferase activity	--	--
transcript_HQ_TX_pn_transcript48992/f5p0/1895	1895	83.6	2e-170	XP_001772908.1	predicted protein [Physcomitrella patens]	--	--	--	--	K04733	IRAK4	interleukin-1 receptor-associated kinase 4	2.7.11.1	ko04064; Environmental Information Processing; Signal transduction; NF-kappa B signaling pathway | ko04620; Organismal Systems; Immune system; Toll-like receptor signaling pathway | ko04624; Organismal Systems; Immune system; Toll and Imd signaling pathway | ko04621; Organismal Systems; Immune system; NOD-like receptor signaling pathway | ko04722; Organismal Systems; Nervous system; Neurotrophin …	53.1	1.9e-102	sp|Q8VZJ9|CRCK2_ARATH	Calmodulin-binding receptor-like cytoplasmic kinase 2 OS=Arabidopsis thaliana GN=CRCK2 PE=2 SV=1	PF00069:Protein kinase domain;PF07714:Protein tyrosine kinase	GO:0006468	protein phosphorylation	--	--	GO:0004672//GO:0005524	protein kinase activity//ATP binding	At4g00330	Serine/threonine protein kinase
transcript_HQ_TX_pn_transcript18001/f6p0/2676	2676	86.9	0	XP_001755871.1	predicted protein [Physcomitrella patens]	85.507	0	XM_001766513.1	Physcomitrella patens subsp. patens 4-hydroxy-3-methylbut-2-en-1-yl diphosphate synthase (HDS3) mRNA, complete cds	K03526	gcpE, ispG	(E)-4-hydroxy-3-methylbut-2-enyl-diphosphate synthase [EC:1.17.7.1 1.17.7.3]	1.17.7.1,1.17.7.3	ko00900; Metabolism; Metabolism of terpenoids and polyketides; Terpenoid backbone biosynthesis	75.6	3.1e-308	sp|Q6K8J4|ISPG_ORYSJ	4-hydroxy-3-methylbut-2-en-1-yl diphosphate synthase (ferredoxin), chloroplastic OS=Oryza sativa subsp. japonica GN=ISPG PE=2 SV=1	PF04551:GcpE protein	GO:0055114//GO:0016114	oxidation-reduction process//terpenoid biosynthetic process	--	--	GO:0046429	4-hydroxy-3-methylbut-2-en-1-yl diphosphate synthase activity	--	--
transcript_HQ_TX_pn_transcript31461/f2p0/2355	2355	81.3	3.2e-29	XP_001771508.1	predicted protein [Physcomitrella patens]	78.319	9.72e-30	XM_001771456.1	Physcomitrella patens subsp. patens predicted protein (PHYPADRAFT_19743) mRNA, partial cds	-	-	-	-	-	37.4	1.5e-11	sp|Q852U6|RHY1A_ARATH	Probable E3 ubiquitin-protein ligase RHY1A OS=Arabidopsis thaliana GN=RHY1A PE=2 SV=1	PF17123:RING-like zinc finger;PF00097:Zinc finger, C3HC4 type (RING finger);PF09726:Transmembrane protein;PF14634:zinc-RING finger domain;PF12861:Anaphase-promoting complex subunit 11 RING-H2 finger;PF13639:Ring finger domain;PF05472:DNA replication terminus site-binding protein (Ter protein);PF12678:RING-H2 zinc finger domain	GO:0006274	DNA replication termination	GO:0005680//GO:0016021//GO:0005737	anaphase-promoting complex//integral component of membrane//cytoplasm	GO:0003677//GO:0004842//GO:0008270//GO:0005515//GO:0046872	DNA binding//ubiquitin-protein transferase activity//zinc ion binding//protein binding//metal ion binding	At2g15580	FOG: Predicted E3 ubiquitin ligase
transcript_HQ_TX_pn_transcript8272/f3p0/3322	3321	70	1.5e-117	XP_001760787.1	predicted protein [Physcomitrella patens]	83.059	0	XM_001771372.1	Physcomitrella patens subsp. patens predicted protein (PHYPADRAFT_217084) mRNA, complete cds	-	-	-	-	-	34.6	1.6e-27	sp|Q9FN03|UVR8_ARATH	Ultraviolet-B receptor UVR8 OS=Arabidopsis thaliana GN=UVR8 PE=1 SV=1	--	--	--	--	--	--	--	At3g55580	FOG: RCC1 domain
transcript_HQ_TX_pn_transcript12343/f14p0/3048	3048	37.2	5.6e-42	XP_002983016.1	hypothetical protein SELMODRAFT_117674, partial [Selaginella moellendorffii]	--	--	--	--	-	-	-	-	-	35.7	3.4e-37	sp|P25848|PHY1_CERPU	Light-sensor Protein kinase OS=Ceratodon purpureus GN=PHY1 PE=3 SV=3	PF00069:Protein kinase domain;PF07714:Protein tyrosine kinase;PF06293:Lipopolysaccharide kinase (Kdo/WaaP) family;PF01926:50S ribosome-binding GTPase	GO:0006468	protein phosphorylation	GO:0016020	membrane	GO:0005525//GO:0005524//GO:0004672//GO:0016773	GTP binding//ATP binding//protein kinase activity//phosphotransferase activity, alcohol group as acceptor	Hs4507361	Tyrosine kinase specific for activated (GTP-bound) p21cdc42Hs
transcript_HQ_TX_pn_transcript61861/f2p0/1548	1548	37.1	4.9e-10	XP_001766735.1	predicted protein [Physcomitrella patens]	--	--	--	--	--	--	--	--	--	--	--	--	--	--	--	--	--	--	--	--	--	--
transcript_HQ_TX_pn_transcript44067/f3p0/2011	2011	58.3	4.5e-181	XP_001756400.1	predicted protein [Physcomitrella patens]	--	--	--	--	-	-	-	-	-	33.9	2.3e-82	sp|Q9LUC8|C7A13_ARATH	Cytochrome P450 72A13 OS=Arabidopsis thaliana GN=CYP72A13 PE=2 SV=1	PF00067:Cytochrome P450	GO:0055114	oxidation-reduction process	--	--	GO:0005506//GO:0016705//GO:0020037	iron ion binding//oxidoreductase activity, acting on paired donors, with incorporation or reduction of molecular oxygen//heme binding	At3g14660	Cytochrome P450 CYP4/CYP19/CYP26 subfamilies
transcript_HQ_TX_pn_transcript29998/f12p0/2362	2362	72.9	4.1e-101	XP_001761033.1	predicted protein [Physcomitrella patens]	81.89	3.11e-114	XM_001760981.1	Physcomitrella patens subsp. patens predicted protein (PHYPADRAFT_181032) mRNA, partial cds	-	-	-	-	-	69	1.4e-67	sp|Q9FLJ2|NC100_ARATH	NAC domain-containing protein 100 OS=Arabidopsis thaliana GN=NAC100 PE=2 SV=1	PF02365:No apical meristem (NAM) protein	GO:0006355	regulation of transcription, DNA-templated	--	--	GO:0003677	DNA binding	--	--
transcript_HQ_TX_pn_transcript59604/f2p0/1620	1620	54.5	2.7e-83	XP_001781580.1	predicted protein [Physcomitrella patens]	94.34	4.08e-12	XM_004965510.1	PREDICTED: Setaria italica peroxidase P7-like (LOC101783109), mRNA	K00430	E1.11.1.7	peroxidase	1.11.1.7	ko00940; Metabolism; Biosynthesis of other secondary metabolites; Phenylpropanoid biosynthesis	47.7	8.9e-69	sp|P00433|PER1A_ARMRU	Peroxidase C1A OS=Armoracia rusticana GN=PRXC1A PE=1 SV=2	PF00141:Peroxidase	GO:0006979//GO:0055114	response to oxidative stress//oxidation-reduction process	--	--	GO:0004601//GO:0020037	peroxidase activity//heme binding	--	--
transcript_HQ_TX_pn_transcript11536/f2p0/3110	3110	78.3	1.6e-206	XP_001767534.1	predicted protein [Physcomitrella patens]	73.529	1.68e-23	XM_016333990.1	PREDICTED: Arachis ipaensis uncharacterized LOC107630764 (LOC107630764), mRNA	-	-	-	-	-	--	--	--	--	PF01762:Galactosyltransferase;PF02434:Fringe-like	GO:0006486	protein glycosylation	GO:0016020	membrane	GO:0008378//GO:0016757	galactosyltransferase activity//transferase activity, transferring glycosyl groups	At1g33250	Galactosyltransferases
transcript_HQ_TX_pn_transcript22646/f3p0/2521	2521	70.5	4.5e-106	XP_001767767.1	predicted protein [Physcomitrella patens]	--	--	--	--	-	-	-	-	-	--	--	--	--	PF00628:PHD-finger;PF00130:Phorbol esters/diacylglycerol binding domain (C1 domain)	GO:0035556	intracellular signal transduction	--	--	GO:0005515	protein binding	--	--
transcript_HQ_TX_pn_transcript51797/f7p0/1830	1830	64.7	2.9e-118	XP_001777954.1	predicted protein [Physcomitrella patens]	--	--	--	--	-	-	-	-	-	54.8	9.8e-64	sp|Q8VZR0|RIBF2_ARATH	FAD synthetase 2, chloroplastic OS=Arabidopsis thaliana GN=RIBF2 PE=1 SV=1	PF01467:Cytidylyltransferase-like;PF06574:FAD synthetase	GO:0009231//GO:0009058	riboflavin biosynthetic process//biosynthetic process	--	--	GO:0003919//GO:0003824	FMN adenylyltransferase activity//catalytic activity	--	--
transcript_HQ_TX_pn_transcript64333/f5p0/1463	1463	34.4	4.6e-34	OAE34006.1	hypothetical protein AXG93_3891s1190 [Marchantia polymorpha subsp. polymorpha]	--	--	--	--	--	--	--	--	--	--	--	--	--	PF01496:V-type ATPase 116kDa subunit family ;PF04111:Autophagy protein Apg6;PF10186:Vacuolar sorting 38 and autophagy-related subunit 14	GO:0015991//GO:0010508//GO:0006914	ATP hydrolysis coupled proton transport//positive regulation of autophagy//autophagy	GO:0033179	proton-transporting V-type ATPase, V0 domain	GO:0015078	hydrogen ion transmembrane transporter activity	--	--
transcript_HQ_TX_pn_transcript44070/f10p0/1999	1999	96.5	1.7e-273	XP_001782554.1	predicted protein [Physcomitrella patens]	83.516	0	XM_001771149.1	Physcomitrella patens subsp. patens predicted protein (PHYPADRAFT_189559) mRNA, complete cds	K00012	UGDH, ugd	UDPglucose 6-dehydrogenase	1.1.1.22	ko00040; Metabolism; Carbohydrate metabolism; Pentose and glucuronate interconversions | ko00053; Metabolism; Carbohydrate metabolism; Ascorbate and aldarate metabolism | ko00520; Metabolism; Carbohydrate metabolism; Amino sugar and nucleotide sugar metabolism	88.7	2.7e-253	sp|Q9AUV6|UGDH3_ORYSJ	UDP-glucose 6-dehydrogenase 3 OS=Oryza sativa subsp. japonica GN=UGD3 PE=2 SV=1	PF03446:NAD binding domain of 6-phosphogluconate dehydrogenase;PF03721:UDP-glucose/GDP-mannose dehydrogenase family, NAD binding domain;PF03435:Saccharopine dehydrogenase NADP binding domain;PF03720:UDP-glucose/GDP-mannose dehydrogenase family, UDP binding domain;PF00984:UDP-glucose/GDP-mannose dehydrogenase family, central domain	GO:0055114	oxidation-reduction process	--	--	GO:0004616//GO:0016616//GO:0016491//GO:0051287	phosphogluconate dehydrogenase (decarboxylating) activity//oxidoreductase activity, acting on the CH-OH group of donors, NAD or NADP as acceptor//oxidoreductase activity//NAD binding	At3g29360	UDP-glucose/GDP-mannose dehydrogenase
transcript_HQ_TX_pn_transcript15852/f3p0/2883	2883	36.7	1.8e-34	GAQ89216.1	ATMRK serine/threonine protein kinase-like [Klebsormidium flaccidum]	--	--	--	--	-	-	-	-	-	35.2	6.7e-35	sp|P25848|PHY1_CERPU	Light-sensor Protein kinase OS=Ceratodon purpureus GN=PHY1 PE=3 SV=3	PF00069:Protein kinase domain;PF07714:Protein tyrosine kinase;PF06293:Lipopolysaccharide kinase (Kdo/WaaP) family	GO:0006468	protein phosphorylation	GO:0016020	membrane	GO:0005524//GO:0004672//GO:0016773	ATP binding//protein kinase activity//phosphotransferase activity, alcohol group as acceptor	At1g62400	Tyrosine kinase specific for activated (GTP-bound) p21cdc42Hs
transcript_HQ_TX_pn_transcript62393/f3p0/1526	1525	73.5	4.7e-90	XP_001785486.1	predicted protein [Physcomitrella patens]	--	--	--	--	K09875	SIP	aquaporin SIP	-	-	46.1	3.9e-50	sp|Q9ATM2|SIP12_MAIZE	Aquaporin SIP1-2 OS=Zea mays GN=SIP1-2 PE=2 SV=1	PF00230:Major intrinsic protein	GO:0006810	transport	GO:0016020	membrane	GO:0005215	transporter activity	At3g04090	Aquaporin (major intrinsic protein family)
transcript_HQ_TX_pn_transcript66093/f8p0/1393	1393	85.5	1.6e-124	XP_001784977.1	predicted protein [Physcomitrella patens]	84.759	0	XM_001784925.1	Physcomitrella patens subsp. patens predicted protein (PHYPADRAFT_173274) mRNA, complete cds	-	-	-	-	-	39.5	4.1e-38	sp|Q9XBR7|Y1337_ZYMMO	Putative quercetin 2,3-dioxygenase ZMO1337 OS=Zymomonas mobilis subsp. mobilis (strain ATCC 31821 / ZM4 / CP4) GN=ZMO1337 PE=3 SV=1	--	--	--	--	--	--	--	--	--
transcript_HQ_TX_pn_transcript33244/f5p0/2285	2285	46.7	6.4e-51	ADE77597.1	unknown [Picea sitchensis]	86.735	4.23e-53	XM_001777935.1	Physcomitrella patens subsp. patens predicted protein (PHYPADRAFT_60268) mRNA, complete cds	-	-	-	-	-	46.1	1.2e-39	sp|Q9SB61|ZHD2_ARATH	Zinc-finger homeodomain protein 2 OS=Arabidopsis thaliana GN=ZHD1 PE=1 SV=1	PF00046:Homeobox domain;PF01527:Transposase	GO:0006313	transposition, DNA-mediated	--	--	GO:0004803//GO:0003677	transposase activity//DNA binding	--	--
transcript_HQ_TX_pn_transcript1598/f2p0/4428	4428	89.7	0	APU94846.1	leucine-rich repeat receptor-like protein kinase [Pohlia nutans]	98.312	0	KX159242.1	Pohlia nutans leucine-rich repeat receptor-like protein kinase (LRR-RLK18) mRNA, complete cds	-	-	-	-	-	35.3	7.2e-145	sp|Q7G768|BRL2_ORYSJ	Brassinosteroid LRR receptor kinase BRL2 OS=Oryza sativa subsp. japonica GN=BRL2 PE=2 SV=1	PF07714:Protein tyrosine kinase;PF13516:Leucine Rich repeat;PF00069:Protein kinase domain;PF13855:Leucine rich repeat;PF00560:Leucine Rich Repeat	GO:0006468	protein phosphorylation	--	--	GO:0005524//GO:0004672//GO:0005515	ATP binding//protein kinase activity//protein binding	--	--
transcript_HQ_TX_pn_transcript7814/f2p0/3414	3415	73.2	9.9e-189	XP_001757336.1	predicted protein [Physcomitrella patens]	85.237	0	XM_001757284.1	Physcomitrella patens subsp. patens predicted protein (PHYPADRAFT_119139) mRNA, partial cds	K01099	INPP5B_F	inositol polyphosphate 5-phosphatase INPP5B/F	3.1.3.36	ko00562; Metabolism; Carbohydrate metabolism; Inositol phosphate metabolism | ko04070; Environmental Information Processing; Signal transduction; Phosphatidylinositol signaling system	38.6	7.8e-99	sp|Q8GTS0|IP5P4_ARATH	Type I inositol polyphosphate 5-phosphatase 4 OS=Arabidopsis thaliana GN=IP5P4 PE=2 SV=1	--	--	--	--	--	--	--	At3g63240	Inositol polyphosphate 5-phosphatase and related proteins
transcript_HQ_TX_pn_transcript25838/f3p0/2506	2506	72.4	1.3e-243	XP_001774033.1	predicted protein [Physcomitrella patens]	75.951	0	XM_001773981.1	Physcomitrella patens subsp. patens predicted protein (PHYPADRAFT_140823) mRNA, partial cds	K14638	SLC15A3_4, PHT	solute carrier family 15 (peptide/histidine transporter), member 3/4	-	-	48	8.8e-148	sp|P46032|PTR2_ARATH	Protein NRT1/ PTR FAMILY 8.3 OS=Arabidopsis thaliana GN=NPF8.3 PE=1 SV=1	PF00854:POT family	GO:0006810	transport	GO:0016020	membrane	GO:0005215	transporter activity	At2g02040	H+/oligopeptide symporter
transcript_HQ_TX_pn_transcript31374/f7p0/2260	2261	85.3	2.6e-177	XP_001753311.1	predicted protein [Physcomitrella patens]	85.089	0	XM_001753259.1	Physcomitrella patens subsp. patens predicted protein (PHYPADRAFT_158970) mRNA, complete cds	-	-	-	-	-	58.1	1.5e-114	sp|Q9FL12|DEGP9_ARATH	Protease Do-like 9 OS=Arabidopsis thaliana GN=DEGP9 PE=1 SV=1	PF00089:Trypsin;PF10459:Peptidase S46;PF00595:PDZ domain (Also known as DHR or GLGF);PF13180:PDZ domain	GO:0006508	proteolysis	--	--	GO:0070009//GO:0005515//GO:0008239//GO:0004252	serine-type aminopeptidase activity//protein binding//dipeptidyl-peptidase activity//serine-type endopeptidase activity	At5g40200	Serine protease
transcript_HQ_TX_pn_transcript30615/f5p0/2301	2301	64.3	4.1e-146	XP_001775418.1	predicted protein [Physcomitrella patens]	--	--	--	--	K19323	ATXN10	ataxin-10	-	-	35	8.1e-15	sp|Q55EI6|ATX10_DICDI	Ataxin-10 homolog OS=Dictyostelium discoideum GN=atxn10 PE=3 SV=1	--	--	--	--	--	--	--	Hs7106299	Uncharacterized conserved protein
transcript_HQ_TX_pn_transcript45791/f4p0/1962	1962	96.5	1.7e-273	XP_001782554.1	predicted protein [Physcomitrella patens]	83.516	0	XM_001771149.1	Physcomitrella patens subsp. patens predicted protein (PHYPADRAFT_189559) mRNA, complete cds	K00012	UGDH, ugd	UDPglucose 6-dehydrogenase	1.1.1.22	ko00040; Metabolism; Carbohydrate metabolism; Pentose and glucuronate interconversions | ko00053; Metabolism; Carbohydrate metabolism; Ascorbate and aldarate metabolism | ko00520; Metabolism; Carbohydrate metabolism; Amino sugar and nucleotide sugar metabolism	88.7	2.7e-253	sp|Q9AUV6|UGDH3_ORYSJ	UDP-glucose 6-dehydrogenase 3 OS=Oryza sativa subsp. japonica GN=UGD3 PE=2 SV=1	PF03446:NAD binding domain of 6-phosphogluconate dehydrogenase;PF03721:UDP-glucose/GDP-mannose dehydrogenase family, NAD binding domain;PF03435:Saccharopine dehydrogenase NADP binding domain;PF00984:UDP-glucose/GDP-mannose dehydrogenase family, central domain;PF03720:UDP-glucose/GDP-mannose dehydrogenase family, UDP binding domain	GO:0055114	oxidation-reduction process	--	--	GO:0051287//GO:0016491//GO:0016616//GO:0004616	NAD binding//oxidoreductase activity//oxidoreductase activity, acting on the CH-OH group of donors, NAD or NADP as acceptor//phosphogluconate dehydrogenase (decarboxylating) activity	At3g29360	UDP-glucose/GDP-mannose dehydrogenase
transcript_HQ_TX_pn_transcript48419/f6p0/1845	1845	93.3	4.7e-28	XP_001764625.1	predicted protein [Physcomitrella patens]	84.358	2.69e-39	KX197177.1	Eleusine coracana DNA-binding with one finger protein 16 (DOF) mRNA, complete cds	-	-	-	-	-	69.6	7.6e-24	sp|Q93ZL5|CDF2_ARATH	Cyclic dof factor 2 OS=Arabidopsis thaliana GN=CDF2 PE=1 SV=2	PF02701:Dof domain, zinc finger	GO:0006355	regulation of transcription, DNA-templated	--	--	GO:0003677	DNA binding	--	--
transcript_HQ_TX_pn_transcript59824/f2p0/1603	1586	87.7	6.3e-130	XP_001759611.1	predicted protein [Physcomitrella patens]	81.325	1.48e-170	XM_001759559.1	Physcomitrella patens subsp. patens predicted protein (PHYPADRAFT_179885) mRNA, complete cds	-	-	-	-	-	32.8	9.1e-34	sp|Q93VH2|BBD2_ARATH	Bifunctional nuclease 2 OS=Arabidopsis thaliana GN=BBD2 PE=2 SV=1	PF02151:UvrB/uvrC motif;PF02577:Bifunctional nuclease	--	--	--	--	GO:0005515//GO:0004518	protein binding//nuclease activity	--	--
transcript_HQ_TX_pn_transcript16858/f12p0/2809	2809	90.6	2.7e-277	APU94844.1	leucine-rich repeat receptor-like protein kinase [Pohlia nutans]	98.458	0	KX159240.1	Pohlia nutans leucine-rich repeat receptor-like protein kinase (LRR-RLK16) mRNA, complete cds	-	-	-	-	-	42.2	8.2e-70	sp|Q9SKB2|SBIR1_ARATH	Leucine-rich repeat receptor-like serine/threonine/tyrosine-protein kinase SOBIR1 OS=Arabidopsis thaliana GN=SOBIR1 PE=1 SV=1	PF00069:Protein kinase domain;PF07714:Protein tyrosine kinase	GO:0006468	protein phosphorylation	--	--	GO:0005524//GO:0004672	ATP binding//protein kinase activity	--	--
transcript_HQ_TX_pn_transcript28950/f3p0/2408	2408	45.6	1.2e-31	XP_001755641.1	predicted protein [Physcomitrella patens]	--	--	--	--	-	-	-	-	-	23.4	1.5e-08	sp|Q9LF88|Y3304_ARATH	Late embryogenesis abundant protein At3g53040 OS=Arabidopsis thaliana GN=At3g53040 PE=2 SV=1	PF02601:Exonuclease VII, large subunit;PF07464:Apolipophorin-III precursor (apoLp-III);PF01442:Apolipoprotein A1/A4/E domain	GO:0042157//GO:0006869	lipoprotein metabolic process//lipid transport	GO:0005576	extracellular region	GO:0008289//GO:0008855	lipid binding//exodeoxyribonuclease VII activity	CE18875	Uncharacterized conserved protein
transcript_HQ_TX_pn_transcript47846/f3p0/1896	1896	61.8	3.7e-92	XP_001763877.1	predicted protein [Physcomitrella patens]	77.507	4.19e-107	XM_001754624.1	Physcomitrella patens subsp. patens predicted protein (PHYPADRAFT_159652) mRNA, complete cds	-	-	-	-	-	--	--	--	--	PF07716:Basic region leucine zipper	GO:0006355	regulation of transcription, DNA-templated	--	--	GO:0043565//GO:0003700	sequence-specific DNA binding//transcription factor activity, sequence-specific DNA binding	--	--
transcript_HQ_TX_pn_transcript24824/f4p0/2535	2535	49.7	2.1e-34	OAE28077.1	hypothetical protein AXG93_4577s1080 [Marchantia polymorpha subsp. polymorpha]	77.473	4.74e-48	DQ889622.1	Physcomitrella patens WRKY transcription factor 3 (WRKY3) mRNA, partial cds	-	-	-	-	-	70.7	1e-26	sp|Q9C983|WRK57_ARATH	Probable WRKY transcription factor 57 OS=Arabidopsis thaliana GN=WRKY57 PE=2 SV=1	PF03106:WRKY DNA -binding domain	GO:0006355	regulation of transcription, DNA-templated	--	--	GO:0003700//GO:0043565	transcription factor activity, sequence-specific DNA binding//sequence-specific DNA binding	--	--
transcript_HQ_TX_pn_transcript605/f2p0/5032	5032	77.4	0	XP_001754894.1	ATP-binding cassette transporter, subfamily G, member 27, group PDR protein PpABCG27 [Physcomitrella patens]	81.622	0	XM_001754842.1	Physcomitrella patens subsp. patens ATP-binding cassette transporter, subfamily G, member 27, group PDR protein PpABCG27 (ppabcg27) mRNA, complete cds	-	-	-	-	-	54.8	0	sp|O24367|TUR2_SPIPO	Pleiotropic drug resistance protein TUR2 OS=Spirodela polyrhiza GN=TUR2 PE=1 SV=1	PF13304:AAA domain, putative AbiEii toxin, Type IV TA system;PF01926:50S ribosome-binding GTPase;PF00004:ATPase family associated with various cellular activities (AAA);PF00005:ABC transporter;PF03796:DnaB-like helicase C terminal domain;PF03193:Protein of unknown function, DUF258;PF06422:CDR ABC transporter;PF01061:ABC-2 type transporter;PF03266:NTPase;PF07728:AAA domain (dynein-related subfamil…	GO:0006260//GO:0006810	DNA replication//transport	GO:0016020//GO:0016021	membrane//integral component of membrane	GO:0098519//GO:0005525//GO:0005524//GO:0003678//GO:0016887//GO:0042626//GO:0003924	nucleotide phosphatase activity, acting on free nucleotides//GTP binding//ATP binding//DNA helicase activity//ATPase activity//ATPase activity, coupled to transmembrane movement of substances//GTPase activity	At1g59870	Pleiotropic drug resistance proteins (PDR1-15), ABC superfamily
transcript_HQ_TX_pn_transcript14294/f2p0/2961	2961	80.2	5.2e-303	XP_001779282.1	predicted protein [Physcomitrella patens]	--	--	--	--	K07870	RHOT1, ARHT1	Ras homolog gene family, member T1	3.6.5.-	ko04214; Cellular Processes; Cell growth and death; Apoptosis - fly	59.3	9.8e-223	sp|Q8RXF8|MIRO1_ARATH	Mitochondrial Rho GTPase 1 OS=Arabidopsis thaliana GN=MIRO1 PE=1 SV=1	PF00036:EF hand;PF13405:EF-hand domain;PF01580:FtsK/SpoIIIE family;PF03193:Protein of unknown function, DUF258;PF10591:Secreted protein acidic and rich in cysteine Ca binding region;PF08477:Ras of Complex, Roc, domain of DAPkinase;PF13499:EF-hand domain pair;PF00071:Ras family;PF01926:50S ribosome-binding GTPase;PF00493:MCM2/3/5 family;PF13202:EF hand;PF05049:Interferon-inducible GTPase (IIGP);PF…	GO:0006260//GO:0007165//GO:0007264	DNA replication//signal transduction//small GTPase mediated signal transduction	GO:0016020//GO:0005578	membrane//proteinaceous extracellular matrix	GO:0005525//GO:0005509//GO:0005524//GO:0003924//GO:0000166//GO:0003677	GTP binding//calcium ion binding//ATP binding//GTPase activity//nucleotide binding//DNA binding	At5g27540	Predicted Ras related/Rac-GTP binding protein
transcript_HQ_TX_pn_transcript67198/f2p0/1343	1343	52.6	1.2e-60	XP_001757198.1	predicted protein [Physcomitrella patens]	--	--	--	--	K00799	GST, gst	glutathione S-transferase	2.5.1.18	ko00480; Metabolism; Metabolism of other amino acids; Glutathione metabolism | ko00980; Metabolism; Xenobiotics biodegradation and metabolism; Metabolism of xenobiotics by cytochrome P450 | ko00982; Metabolism; Xenobiotics biodegradation and metabolism; Drug metabolism - cytochrome P450 | ko05204; Human Diseases; Cancers: Overview; Chemical carcinogenesis | ko05418; Human Diseases; Cardiovascular…	37.6	3.1e-35	sp|P42761|GSTFA_ARATH	Glutathione S-transferase F10 OS=Arabidopsis thaliana GN=GSTF10 PE=1 SV=3	PF02798:Glutathione S-transferase, N-terminal domain;PF13417:Glutathione S-transferase, N-terminal domain;PF13409:Glutathione S-transferase, N-terminal domain	--	--	--	--	GO:0005515	protein binding	At2g30870	Glutathione S-transferase
transcript_HQ_TX_pn_transcript53032/f2p0/1801	1801	62.5	2.2e-139	XP_001757130.1	predicted protein [Physcomitrella patens]	80.277	1.68e-175	XM_001757078.1	Physcomitrella patens subsp. patens predicted protein (PHYPADRAFT_177819) mRNA, complete cds	-	-	-	-	-	--	--	--	--	PF00071:Ras family;PF01926:50S ribosome-binding GTPase;PF08477:Ras of Complex, Roc, domain of DAPkinase	GO:0007264	small GTPase mediated signal transduction	--	--	GO:0005525	GTP binding	At5g65960	Uncharacterized conserved protein
transcript_HQ_TX_pn_transcript63852/f3p0/1407	1407	26.9	2.5e-13	ABK26261.1	unknown [Picea sitchensis]	96.104	1.61e-25	KX159269.1	Pohlia nutans leucine-rich repeat receptor-like protein kinase (LRR-RLK45) mRNA, complete cds	--	--	--	--	--	--	--	--	--	--	--	--	--	--	--	--	--	--
transcript_HQ_TX_pn_transcript8199/f2p0/3350	3349	76.4	0	XP_001775762.1	predicted protein [Physcomitrella patens]	81.3	0	XM_001775710.1	Physcomitrella patens subsp. patens predicted protein (PHYPADRAFT_168991) mRNA, complete cds	-	-	-	-	-	36.3	7.9e-112	sp|Q8VZD4|DEG15_ARATH	Glyoxysomal processing protease, glyoxysomal OS=Arabidopsis thaliana GN=DEG15 PE=1 SV=2	PF00089:Trypsin;PF10459:Peptidase S46;PF02907:Hepatitis C virus NS3 protease	GO:0006508//GO:0019087	proteolysis//transformation of host cell by virus	--	--	GO:0004252//GO:0070009//GO:0008239//GO:0008236	serine-type endopeptidase activity//serine-type aminopeptidase activity//dipeptidyl-peptidase activity//serine-type peptidase activity	At1g28320	Serine protease
transcript_HQ_TX_pn_transcript11401/f3p0/3135	3136	72.1	0	XP_001779104.1	predicted protein [Physcomitrella patens]	--	--	--	--	K03549	kup	KUP system potassium uptake protein	-	-	53.6	2.9e-241	sp|Q942X8|HAK2_ORYSJ	Probable potassium transporter 2 OS=Oryza sativa subsp. japonica GN=HAK2 PE=2 SV=1	PF02705:K+ potassium transporter	GO:0071805	potassium ion transmembrane transport	GO:0016020	membrane	GO:0015079	potassium ion transmembrane transporter activity	--	--
transcript_HQ_TX_pn_transcript27818/f3p0/2439	2439	84.1	2.7e-156	XP_001757199.1	predicted protein [Physcomitrella patens]	76.25	3.65e-24	XM_015840949.1	PREDICTED: Oryza brachyantha probable receptor-like protein kinase At5g47070 (LOC102712571), mRNA	K04733	IRAK4	interleukin-1 receptor-associated kinase 4	2.7.11.1	ko04064; Environmental Information Processing; Signal transduction; NF-kappa B signaling pathway | ko04620; Organismal Systems; Immune system; Toll-like receptor signaling pathway | ko04624; Organismal Systems; Immune system; Toll and Imd signaling pathway | ko04621; Organismal Systems; Immune system; NOD-like receptor signaling pathway | ko04722; Organismal Systems; Nervous system; Neurotrophin …	51.8	1.2e-93	sp|Q9LFP7|PIX7_ARATH	Probable serine/threonine-protein kinase PIX7 OS=Arabidopsis thaliana GN=PIX7 PE=1 SV=1	PF00069:Protein kinase domain;PF07714:Protein tyrosine kinase	GO:0006468	protein phosphorylation	--	--	GO:0005524//GO:0004672	ATP binding//protein kinase activity	At2g28940	Serine/threonine protein kinase
transcript_HQ_TX_pn_transcript32463/f2p0/2187	2185	39.5	4.6e-22	XP_001782865.1	predicted protein [Physcomitrella patens]	--	--	--	--	--	--	--	--	--	--	--	--	--	--	--	--	--	--	--	--	--	--
transcript_HQ_TX_pn_transcript66317/f6p0/1363	1365	72.4	1.7e-136	XP_001756841.1	predicted protein [Physcomitrella patens]	81.05	0	XM_001756789.1	Physcomitrella patens subsp. patens predicted protein (PHYPADRAFT_24021) mRNA, partial cds	-	-	-	-	-	--	--	--	--	PF09459:Ethylbenzene dehydrogenase	--	--	--	--	GO:0020037	heme binding	--	--
transcript_HQ_TX_pn_transcript39194/f6p0/2109	2109	81.3	3.8e-29	XP_001771508.1	predicted protein [Physcomitrella patens]	77.876	4.04e-28	XM_001771456.1	Physcomitrella patens subsp. patens predicted protein (PHYPADRAFT_19743) mRNA, partial cds	-	-	-	-	-	40.3	1e-11	sp|Q852U6|RHY1A_ARATH	Probable E3 ubiquitin-protein ligase RHY1A OS=Arabidopsis thaliana GN=RHY1A PE=2 SV=1	PF05472:DNA replication terminus site-binding protein (Ter protein);PF12678:RING-H2 zinc finger domain;PF14634:zinc-RING finger domain;PF13639:Ring finger domain;PF09726:Transmembrane protein;PF02535:ZIP Zinc transporter;PF00097:Zinc finger, C3HC4 type (RING finger);PF17123:RING-like zinc finger	GO:0055085//GO:0006274//GO:0030001	transmembrane transport//DNA replication termination//metal ion transport	GO:0016020//GO:0005737//GO:0016021	membrane//cytoplasm//integral component of membrane	GO:0046873//GO:0008270//GO:0046872//GO:0005515//GO:0003677	metal ion transmembrane transporter activity//zinc ion binding//metal ion binding//protein binding//DNA binding	At2g15580	FOG: Predicted E3 ubiquitin ligase
transcript_HQ_TX_pn_transcript59271/f3p0/1626	1626	54.2	4.3e-81	XP_001781580.1	predicted protein [Physcomitrella patens]	92.453	1.91e-10	XM_004965510.1	PREDICTED: Setaria italica peroxidase P7-like (LOC101783109), mRNA	K00430	E1.11.1.7	peroxidase	1.11.1.7	ko00940; Metabolism; Biosynthesis of other secondary metabolites; Phenylpropanoid biosynthesis	45.6	1.1e-66	sp|P17180|PER3_ARMRU	Peroxidase C3 OS=Armoracia rusticana GN=PRXC3 PE=3 SV=1	PF00141:Peroxidase	GO:0055114//GO:0006979	oxidation-reduction process//response to oxidative stress	--	--	GO:0020037//GO:0004601	heme binding//peroxidase activity	--	--
transcript_HQ_TX_pn_transcript59160/f4p0/1615	1616	74.4	1e-167	XP_001770132.1	predicted protein [Physcomitrella patens]	78.505	0	XM_001770080.1	Physcomitrella patens subsp. patens predicted protein (PHYPADRAFT_188612) mRNA, complete cds	-	-	-	-	-	48.1	3.6e-94	sp|Q9SHJ8|HIBC8_ARATH	3-hydroxyisobutyryl-CoA hydrolase-like protein 5 OS=Arabidopsis thaliana GN=At1g06550 PE=1 SV=2	PF16113:Enoyl-CoA hydratase/isomerase;PF00378:Enoyl-CoA hydratase/isomerase	GO:0008152	metabolic process	--	--	GO:0003860//GO:0003824	3-hydroxyisobutyryl-CoA hydrolase activity//catalytic activity	--	--
transcript_HQ_TX_pn_transcript41803/f4p0/2054	2054	88.6	2.5e-155	XP_001774165.1	predicted protein [Physcomitrella patens]	76.237	7.34e-130	XM_001755793.1	Physcomitrella patens subsp. patens predicted protein (PHYPADRAFT_117260) mRNA, complete cds	-	-	-	-	-	52.2	7.5e-89	sp|Q2MHE4|HT1_ARATH	Serine/threonine-protein kinase HT1 OS=Arabidopsis thaliana GN=HT1 PE=1 SV=1	PF00069:Protein kinase domain;PF07714:Protein tyrosine kinase;PF06293:Lipopolysaccharide kinase (Kdo/WaaP) family	GO:0006468	protein phosphorylation	GO:0016020	membrane	GO:0005524//GO:0004672//GO:0016773	ATP binding//protein kinase activity//phosphotransferase activity, alcohol group as acceptor	At1g62400	Tyrosine kinase specific for activated (GTP-bound) p21cdc42Hs
transcript_HQ_TX_pn_transcript67878/f2p0/1313	1313	29.2	5.6e-07	XP_001764942.1	predicted protein [Physcomitrella patens]	93.75	1.18e-16	KX159266.1	Pohlia nutans leucine-rich repeat receptor-like protein kinase (LRR-RLK42) mRNA, complete cds	-	-	-	-	-	--	--	--	--	PF06305:Protein of unknown function (DUF1049)	--	--	GO:0005887	integral component of plasma membrane	--	--	--	--
[truncated: 903 more rows]
